# Supplementary material for: An Information Theoretical Multilayer Network Approach to Breast Cancer Transcriptional Regulation
Source: Front Genet. 2021 Mar 18;12:617512. doi: 10.3389/fgene.2021.617512 (PMC8014033; doi:10.3389/fgene.2021.617512)
Supplement: Supplementary file 1 [file Table_1.XLSX]

## Sheet: supplementary_file_1
submitter_id	primary_diagnosis	progression_or_recurrence	ajcc_pathologic_m	tumor_grade	ajcc_pathologic_t	ajcc_pathologic_stage	site_of_resection_or_biopsy	prior_treatment	prior_malignancy	morphology	icd_10_code	state	synchronous_malignancy	classification_of_tumor	diagnosis_id	tissue_or_organ_of_origin	days_to_last_follow_up	days_to_recurrence	tumor_stage	year_of_diagnosis	age_at_diagnosis	updated_datetime	created_datetime	last_known_disease_status	ajcc_staging_system_edition	ajcc_pathologic_n	days_to_diagnosis	days_to_last_known_disease_status	weight	height	alcohol_intensity	alcohol_history	years_smoked	exposure_id	bmi	cigarettes_per_day	age_at_index	days_to_birth	year_of_birth	year_of_death	demographic_id	vital_status	ethnicity	gender	race	days_to_death	therapeutic_agents	treatment_anatomic_site	treatment_type
TCGA-3C-AAAU	Lobular carcinoma, NOS	not reported	MX	not reported	TX	Stage X	Breast, NOS	No	no	8520/3	C50.9	released	No	not reported	8cfb8afb-b915-5255-865b-a5923f47b351	Breast, NOS	4047	NA	stage x	2004	20211	2019-08-08T16:19:58.650144-05:00	NA	not reported	6th	NX	0	NA	NA	NA	NA	Not Reported	NA	72f0be98-dffa-5d35-88fe-f9ca774d6db0	NA	NA	55	-20211	1949	NA	cee0a94c-1d9e-5650-a500-a6b021fe138d	Alive	not hispanic or latino	female	white	NA	NA	NA	Radiation Therapy, NOS
TCGA-3C-AALI	Infiltrating duct carcinoma, NOS	not reported	M0	not reported	T2	Stage IIB	Breast, NOS	No	no	8500/3	C50.9	released	No	not reported	8cafc022-585f-54a1-a7d4-cfa632b3991e	Breast, NOS	4005	NA	stage iib	2003	18538	2019-08-08T16:19:58.650144-05:00	NA	not reported	6th	N1a	0	NA	NA	NA	NA	Not Reported	NA	63b59ac3-ccc2-5590-bff7-673f15713369	NA	NA	50	-18538	1953	NA	583a1ee5-3175-523e-ba1f-75a30a3e1e41	Alive	not hispanic or latino	female	black or african american	NA	NA	NA	Radiation Therapy, NOS
TCGA-3C-AALJ	Infiltrating duct carcinoma, NOS	not reported	M0	not reported	T2	Stage IIB	Breast, NOS	No	no	8500/3	C50.9	released	No	not reported	63d85b81-8eba-5f17-8552-92babf137c00	Breast, NOS	1474	NA	stage iib	2011	22848	2019-08-08T16:19:58.650144-05:00	NA	not reported	7th	N1a	0	NA	NA	NA	NA	Not Reported	NA	05defab8-b347-540a-8950-8a180faeb67e	NA	NA	62	-22848	1949	NA	9619a908-1684-547f-a407-6adf93e15b8d	Alive	not hispanic or latino	female	black or african american	NA	NA	NA	Radiation Therapy, NOS
TCGA-3C-AALK	Infiltrating duct carcinoma, NOS	not reported	M0	not reported	T1c	Stage IA	Breast, NOS	No	no	8500/3	C50.9	released	No	not reported	8c90b19d-54f7-5788-a5eb-49abe239ef0b	Breast, NOS	1448	NA	stage ia	2011	19074	2019-08-08T16:19:58.650144-05:00	NA	not reported	7th	N0 (i+)	0	NA	NA	NA	NA	Not Reported	NA	a97db788-0772-5d32-878c-d2080d979c37	NA	NA	52	-19074	1959	NA	e54b1469-fffc-5291-a8e3-df2092ab5f34	Alive	not hispanic or latino	female	black or african american	NA	NA	NA	Radiation Therapy, NOS
TCGA-4H-AAAK	Lobular carcinoma, NOS	not reported	M0	not reported	T2	Stage IIIA	Breast, NOS	No	no	8520/3	C50.9	released	No	not reported	81c406cd-ad2d-552f-b543-8b2b03044686	Breast, NOS	348	NA	stage iiia	2013	18371	2019-08-08T16:19:58.650144-05:00	NA	not reported	7th	N2a	0	NA	NA	NA	NA	Not Reported	NA	e80a24a3-d0fc-5067-a47d-83ac937af2f0	NA	NA	50	-18371	1963	NA	64a204f0-b380-5962-a927-84af1841b6d6	Alive	not hispanic or latino	female	white	NA	NA	NA	Radiation Therapy, NOS
TCGA-5L-AAT0	Lobular carcinoma, NOS	not reported	M0	not reported	T2	Stage IIA	Breast, NOS	No	yes	8520/3	C50.9	released	Not Reported	not reported	ebff6a7b-3b6c-5f71-86b0-1bdd3b78edd4	Breast, NOS	1477	NA	stage iia	2010	15393	2019-08-08T16:19:58.650144-05:00	NA	not reported	7th	N0	0	NA	NA	NA	NA	Not Reported	NA	47c9213f-b2b8-5297-a0b6-21bce2cfa3f8	NA	NA	42	-15393	1968	NA	776bb6f9-f5c8-57b6-bf4d-4014b8025a06	Alive	hispanic or latino	female	white	NA	NA	NA	Radiation Therapy, NOS
TCGA-5L-AAT1	Lobular carcinoma, NOS	not reported	M1	not reported	T2	Stage IV	Breast, NOS	No	yes	8520/3	C50.9	released	Not Reported	not reported	b213c52a-983e-5907-80c9-b30320eee559	Breast, NOS	1471	NA	stage iv	2010	23225	2019-08-08T16:19:58.650144-05:00	NA	not reported	7th	N0	0	NA	NA	NA	NA	Not Reported	NA	760f5e90-3d54-53d0-bd5c-f9e4e36c86b8	NA	NA	63	-23225	1947	NA	8c9b63e8-9c76-5eaa-9acd-04f2b8e2449d	Alive	hispanic or latino	female	white	NA	NA	NA	Radiation Therapy, NOS
TCGA-5T-A9QA	Infiltrating duct mixed with other types of carcinoma	not reported	MX	not reported	T2	Stage IIA	Breast, NOS	No	no	8523/3	C50.9	released	No	not reported	66697713-4fa5-5cbf-bc61-8924ff59636e	Breast, NOS	303	NA	stage iia	2013	19031	2019-08-08T16:19:58.650144-05:00	NA	not reported	7th	NX	0	NA	NA	NA	NA	Not Reported	NA	6d804782-fbb3-5568-96a7-69293478be61	NA	NA	52	-19031	1961	NA	b0b06fb0-7be5-5fe2-93be-4f83e57ea55a	Alive	not hispanic or latino	female	black or african american	NA	NA	NA	Radiation Therapy, NOS
TCGA-A1-A0SE	Infiltrating duct and lobular carcinoma	not reported	M0	not reported	T1c	Stage I	Breast, NOS	No	no	8522/3	C50.9	released	No	not reported	003f1965-f1c7-5613-87cd-c286b6a9eec5	Breast, NOS	1321	NA	stage i	2005	20717	2019-08-08T16:19:58.650144-05:00	NA	not reported	6th	N0 (i-)	0	NA	NA	NA	NA	Not Reported	NA	3bc5fdfe-9a63-5f7e-888e-71d4724a7f4b	NA	NA	56	-20717	1949	NA	875022cb-fd30-5660-97b1-f85db82461c2	Alive	not hispanic or latino	female	white	NA	NA	NA	Radiation Therapy, NOS
TCGA-A1-A0SF	Infiltrating duct carcinoma, NOS	not reported	M0	not reported	T2	Stage IIA	Breast, NOS	No	no	8500/3	C50.9	released	No	not reported	f1d27fff-a484-5492-8db3-1786f51f5167	Breast, NOS	1463	NA	stage iia	2006	19731	2019-08-08T16:19:58.650144-05:00	NA	not reported	6th	N0	0	NA	NA	NA	NA	Not Reported	NA	ecd14029-6fe2-5cb5-a0ea-92ec4bb3bee4	NA	NA	54	-19731	1952	NA	ff4839e9-fa21-5c39-bda8-06ec59b9cc13	Alive	not hispanic or latino	female	white	NA	NA	NA	Radiation Therapy, NOS
TCGA-A1-A0SG	Intraductal micropapillary carcinoma	not reported	M0	not reported	T2	Stage IIB	Breast, NOS	No	no	8507/3	C50.9	released	No	not reported	53f4445e-8f57-577d-b1ce-d0a90cb88b23	Breast, NOS	434	NA	stage iib	2006	22380	2019-08-08T16:19:58.650144-05:00	NA	not reported	6th	N1a	0	NA	NA	NA	NA	Not Reported	NA	c072cf1e-6609-5779-9234-44580502a8dc	NA	NA	61	-22380	1945	NA	4b05cd26-c69a-5d37-bc05-5f02e8d35c6e	Alive	not hispanic or latino	female	white	NA	NA	NA	Radiation Therapy, NOS
TCGA-A1-A0SH	Infiltrating duct carcinoma, NOS	not reported	M0	not reported	T2	Stage IIA	Breast, NOS	No	no	8500/3	C50.9	released	No	not reported	d2a8b3e6-c0e0-56d6-8aea-6431522b570b	Breast, NOS	1437	NA	stage iia	2006	14595	2019-08-08T16:19:58.650144-05:00	NA	not reported	6th	N0 (i-)	0	NA	NA	NA	NA	Not Reported	NA	61106b66-7f0e-5d76-9617-803998d62385	NA	NA	39	-14595	1967	NA	8860271f-713d-548d-8bce-71d9b2d5a89f	Alive	not hispanic or latino	female	white	NA	NA	NA	Radiation Therapy, NOS
TCGA-A1-A0SI	Infiltrating duct carcinoma, NOS	not reported	M0	not reported	T2	Stage IIB	Breast, NOS	No	no	8500/3	C50.9	released	No	not reported	ce2b4bc1-d626-51df-92ee-96bc823134e0	Breast, NOS	635	NA	stage iib	2007	19250	2019-08-08T16:19:58.650144-05:00	NA	not reported	6th	N1a	0	NA	NA	NA	NA	Not Reported	NA	c579dcd1-acba-5235-8004-a4ae1c285231	NA	NA	52	-19250	1955	NA	ba9e0d8a-b060-5988-815a-43e28464ad3f	Alive	not hispanic or latino	female	white	NA	NA	NA	Radiation Therapy, NOS
TCGA-A1-A0SJ	Infiltrating duct carcinoma, NOS	not reported	M0	not reported	T3	Stage IIIA	Breast, NOS	No	no	8500/3	C50.9	released	No	not reported	7ac18780-104a-59e0-84c5-d6f90272135a	Breast, NOS	416	NA	stage iiia	2006	14383	2019-08-08T16:19:58.650144-05:00	NA	not reported	6th	N1a	0	NA	NA	NA	NA	Not Reported	NA	c7dd5c8c-97b1-5ca8-b5a4-2e12bff420e6	NA	NA	39	-14383	1967	NA	f0a1bc0f-b9d6-5bae-8fe5-360d42b225f5	Alive	not hispanic or latino	female	black or african american	NA	NA	NA	Radiation Therapy, NOS
TCGA-A1-A0SK	Large cell neuroendocrine carcinoma	not reported	M0	not reported	T2	Stage IIA	Breast, NOS	No	no	8013/3	C50.9	released	No	not reported	02279494-0bc9-57fd-8b68-43ad9d2662ba	Breast, NOS	NA	NA	stage iia	2007	20048	2019-08-08T16:19:58.650144-05:00	NA	not reported	6th	N0 (i-)	0	NA	NA	NA	NA	Not Reported	NA	cd145362-1cd2-5fc9-a260-63f1e42764ce	NA	NA	54	-20048	1953	2009	41ca571a-b9a5-5864-b246-d178be46891e	Dead	not hispanic or latino	female	asian	967	NA	NA	Radiation Therapy, NOS
TCGA-A1-A0SN	Infiltrating duct carcinoma, NOS	not reported	MX	not reported	T1c	Stage IIA	Breast, NOS	No	no	8500/3	C50.9	released	No	not reported	871ff888-8bf8-5b09-819c-df834f802044	Breast, NOS	1196	NA	stage iia	2007	18401	2019-08-08T16:19:58.650144-05:00	NA	not reported	6th	N1	0	NA	NA	NA	NA	Not Reported	NA	26dc1346-6830-5c83-9ce3-49a05b1eb0dd	NA	NA	50	-18401	1957	NA	e08dce13-813f-54a9-821d-c27c758d3432	Alive	not hispanic or latino	female	white	NA	NA	NA	Radiation Therapy, NOS
TCGA-A1-A0SO	Infiltrating duct carcinoma, NOS	not reported	M0	not reported	T2	Stage IIB	Breast, NOS	No	no	8500/3	C50.9	released	No	not reported	d17947f2-132e-560c-954e-b742ed6ae98a	Breast, NOS	852	NA	stage iib	2007	24826	2019-08-08T16:19:58.650144-05:00	NA	not reported	6th	N1	0	NA	NA	NA	NA	Not Reported	NA	ae8d629d-fea0-5d27-b94f-101eff5e9342	NA	NA	67	-24826	1940	NA	9d851ce6-34b6-510b-b9da-48ed16d0c03f	Alive	not hispanic or latino	female	white	NA	NA	NA	Radiation Therapy, NOS
TCGA-A1-A0SP	Infiltrating duct carcinoma, NOS	not reported	M0	not reported	T2	Stage IIA	Breast, NOS	Not Reported	yes	8500/3	C50.9	released	Not Reported	not reported	db034f67-b06d-5ef6-81ac-1fea90c01849	Breast, NOS	584	NA	stage iia	2007	14954	2019-08-08T16:19:58.650144-05:00	NA	not reported	6th	N0 (i-)	0	NA	NA	NA	NA	Not Reported	NA	5d3eae4a-9362-5b20-95b7-71d316159659	NA	NA	40	-14954	1967	NA	f7ed8691-ed3d-54bf-94c5-7fb853c3e02c	Alive	not hispanic or latino	female	not reported	NA	NA	NA	Radiation Therapy, NOS
TCGA-A1-A0SQ	Infiltrating duct carcinoma, NOS	not reported	MX	not reported	T2	Stage IIB	Breast, NOS	No	no	8500/3	C50.9	released	No	not reported	bb41df9b-9b84-5f7c-a046-f405784ac631	Breast, NOS	554	NA	stage iib	2007	16458	2019-08-08T16:19:58.650144-05:00	NA	not reported	6th	N1	0	NA	NA	NA	NA	Not Reported	NA	a0a88576-d73f-58a3-bed1-115e1e86c362	NA	NA	45	-16458	1962	NA	595b4d1c-1f86-52c9-a01e-58f43c9fa560	Alive	not hispanic or latino	female	white	NA	NA	NA	Radiation Therapy, NOS
TCGA-A2-A04R	Infiltrating duct carcinoma, NOS	not reported	M0	not reported	T1	Stage IA	Breast, NOS	No	no	8500/3	C50.9	released	No	not reported	f513566f-b450-5b74-adf6-d94500114a8c	Breast, NOS	3709	NA	stage ia	2004	13483	2019-08-08T16:19:58.650144-05:00	NA	not reported	6th	N0 (i-)	0	NA	NA	NA	NA	Not Reported	NA	ac54fcdf-4bc9-549b-ac36-9e12c55e7407	NA	NA	36	-13483	1968	NA	d1f2e405-cdb7-55e7-8af4-9dc226e314aa	Alive	not hispanic or latino	female	black or african american	NA	NA	NA	Radiation Therapy, NOS
TCGA-A2-A0CK	Lobular carcinoma, NOS	not reported	M0	not reported	T3	Stage IIIA	Breast, NOS	No	no	8520/3	C50.9	released	No	not reported	10bf984a-c40c-5fc7-8a9b-8c7952b0b6b1	Breast, NOS	4159	NA	stage iiia	2001	22094	2019-08-08T16:19:58.650144-05:00	NA	not reported	5th	N2a	0	NA	NA	NA	NA	Not Reported	NA	24eabdec-cc24-53db-90b2-13ad95ca7336	NA	NA	60	-22094	1941	NA	b950212d-45fa-5813-bfdb-dcae9b934d06	Alive	not hispanic or latino	female	white	NA	NA	NA	Radiation Therapy, NOS
TCGA-A2-A0CO	Lobular carcinoma, NOS	not reported	M0	not reported	T3	Stage IIB	Breast, NOS	No	no	8520/3	C50.9	released	No	not reported	47716aa9-56ea-5830-b45b-1241dbf5b480	Breast, NOS	1468	NA	stage iib	2002	31404	2019-08-08T16:19:58.650144-05:00	NA	not reported	7th	N0	0	NA	NA	NA	NA	Not Reported	NA	7a11d341-238c-5c57-b74e-a6ce71170158	NA	NA	85	-31404	1917	NA	574d7b03-e1f6-5e64-84dd-88fb7a72fba1	Dead	not hispanic or latino	female	white	1468	NA	NA	Radiation Therapy, NOS
TCGA-A2-A0CR	Lobular carcinoma, NOS	not reported	M0	not reported	T3	Stage IIB	Breast, NOS	No	no	8520/3	C50.9	released	No	not reported	0d0bce6c-3ebe-5954-820c-f14119c7d07b	Breast, NOS	3283	NA	stage iib	2004	20075	2019-08-08T16:19:58.650144-05:00	NA	not reported	7th	N0	0	NA	NA	NA	NA	Not Reported	NA	b2f616be-e9bc-5fcb-a0a7-33f6d1101ba6	NA	NA	54	-20075	1950	NA	8c33407c-0163-5861-bb67-ccb7aa8611e9	Alive	not hispanic or latino	female	asian	NA	NA	NA	Radiation Therapy, NOS
TCGA-A2-A0CT	Infiltrating duct carcinoma, NOS	not reported	M0	not reported	T2	Stage IIA	Breast, NOS	No	no	8500/3	C50.9	released	No	not reported	275a6eea-86d4-531f-9569-120cee0e577c	Breast, NOS	2289	NA	stage iia	2005	25959	2019-08-08T16:19:58.650144-05:00	NA	not reported	6th	N0 (i-)	0	NA	NA	NA	NA	Not Reported	NA	b9b7a308-3eb7-5462-8c19-6e5486f5236e	NA	NA	71	-25959	1934	NA	c294ac8b-3473-5f66-a5c9-460c46b53266	Alive	not hispanic or latino	female	white	NA	NA	NA	Radiation Therapy, NOS
TCGA-A2-A0EN	Lobular carcinoma, NOS	not reported	M0	not reported	T2	Stage IIA	Breast, NOS	No	no	8520/3	C50.9	released	No	not reported	c0e17050-4d53-5fbd-90d4-c1149b6ad715	Breast, NOS	4088	NA	stage iia	2003	25771	2019-08-08T16:20:36.231004-05:00	NA	not reported	6th	N0 (i+)	0	NA	NA	NA	NA	Not Reported	NA	e424b149-01db-5781-b816-54a8c5bc14ba	NA	NA	70	-25771	1933	NA	437548f2-118e-5cce-b2f2-6465928aef60	Alive	not hispanic or latino	female	white	NA	NA	NA	Radiation Therapy, NOS
TCGA-A2-A0EP	Lobular carcinoma, NOS	not reported	M0	not reported	T1	Stage I	Breast, NOS	No	no	8520/3	C50.9	released	No	not reported	e287f3c3-87f6-53a3-b428-0888404ee542	Breast, NOS	3603	NA	stage i	2004	20585	2019-08-08T16:20:36.231004-05:00	NA	not reported	6th	N0 (i+)	0	NA	NA	NA	NA	Not Reported	NA	9ba6ca0f-fdf4-5ff6-90d5-6f7a7a3a89bc	NA	NA	56	-20585	1948	NA	a4f85d9d-fc42-5b52-894c-a164c1078c95	Alive	not hispanic or latino	female	white	NA	NA	NA	Radiation Therapy, NOS
TCGA-A2-A0EU	Infiltrating duct carcinoma, NOS	not reported	M0	not reported	T1c	Stage IA	Breast, NOS	No	no	8500/3	C50.9	released	No	not reported	6027646c-1c48-5e47-b1ea-6d8938aec5a0	Breast, NOS	1043	NA	stage ia	2008	29144	2019-08-08T16:20:36.231004-05:00	NA	not reported	6th	N0 (i-)	0	NA	NA	NA	NA	Not Reported	NA	24699767-213f-5b7d-b829-4138c57ab9f0	NA	NA	79	-29144	1929	NA	46a906a5-1a6a-59bb-86c8-40b519cff78a	Alive	not hispanic or latino	female	white	NA	NA	NA	Radiation Therapy, NOS
TCGA-A2-A0ST	Infiltrating duct carcinoma, NOS	not reported	M0	not reported	T1c	Stage IIA	Breast, NOS	No	no	8500/3	C50.9	released	No	not reported	453aaf1c-8ba8-5867-8bd4-884f896ae036	Breast, NOS	3017	NA	stage iia	2003	22922	2019-08-08T16:20:36.231004-05:00	NA	not reported	6th	N1a	0	NA	NA	NA	NA	Not Reported	NA	a9793c13-15f4-5a41-b5ca-9b55bffde65d	NA	NA	62	-22922	1941	NA	8e1277b5-6aad-5371-b041-b8d2819f81aa	Alive	not hispanic or latino	female	white	NA	NA	NA	Radiation Therapy, NOS
TCGA-A2-A0SU	Infiltrating duct carcinoma, NOS	not reported	M0	not reported	T2	Stage IIA	Breast, NOS	No	no	8500/3	C50.9	released	No	not reported	23bafe39-f12a-5631-82ec-70325a9ea4e2	Breast, NOS	1662	NA	stage iia	2006	24219	2019-08-08T16:20:36.231004-05:00	NA	not reported	NA	N0 (i+)	0	NA	NA	NA	NA	Not Reported	NA	86c9a334-c7bc-5a77-a177-038735b95e77	NA	NA	66	-24219	1940	NA	86fe3199-3b3f-5c76-ac66-06d0ca7e33e0	Alive	not hispanic or latino	female	white	NA	NA	NA	Radiation Therapy, NOS
TCGA-A2-A0SV	Infiltrating duct carcinoma, NOS	not reported	M1	not reported	T2	Stage IV	Breast, NOS	No	no	8500/3	C50.9	released	No	not reported	e64ec0a8-0078-57ec-b6e6-2826019c0f0e	Breast, NOS	NA	NA	stage iv	2006	23126	2019-08-08T16:20:36.231004-05:00	NA	not reported	6th	N2a	0	NA	NA	NA	NA	Not Reported	NA	23778f9f-1262-5b80-b8ae-e980d816ccbb	NA	NA	63	-23126	1943	2008	9067408a-21c5-5a58-928e-1b1b7ceed2d8	Dead	not hispanic or latino	female	white	825	NA	NA	Radiation Therapy, NOS
TCGA-A2-A0SW	Infiltrating duct carcinoma, NOS	not reported	M1	not reported	T2	Stage IV	Breast, NOS	No	no	8500/3	C50.9	released	No	not reported	3a85bfbb-6e71-5d06-bc54-6e7510abaeb9	Breast, NOS	NA	NA	stage iv	2006	30085	2019-08-08T16:20:36.231004-05:00	NA	not reported	NA	N2	0	NA	NA	NA	NA	Not Reported	NA	324b8973-d2e3-5009-8db9-6fed8e7a138b	NA	NA	82	-30085	1924	2009	21d1fea6-c2f4-56e7-9403-5317dae6de4c	Dead	not hispanic or latino	female	white	1365	NA	NA	Radiation Therapy, NOS
TCGA-A2-A0SX	Infiltrating duct carcinoma, NOS	not reported	M0	not reported	T1c	Stage IA	Breast, NOS	No	no	8500/3	C50.9	released	No	not reported	4a08398d-fe29-53a5-be3f-efdb92daba7c	Breast, NOS	1534	NA	stage ia	2007	17774	2019-08-08T16:20:36.231004-05:00	NA	not reported	6th	N0 (i-)	0	NA	NA	NA	NA	Not Reported	NA	1a85f9be-2196-5c5b-bccd-47ba0ddd993c	NA	NA	48	-17774	1959	NA	b281bb39-7828-55e6-a1b7-a8cfad321e3f	Alive	not hispanic or latino	female	white	NA	NA	NA	Radiation Therapy, NOS
TCGA-A2-A0SY	Lobular carcinoma, NOS	not reported	M0	not reported	T3	Stage IIIA	Breast, NOS	No	no	8520/3	C50.9	released	No	not reported	dfc568f2-5848-5517-b725-2d973539a801	Breast, NOS	1347	NA	stage iiia	2007	22928	2019-08-08T16:20:36.231004-05:00	NA	not reported	NA	N1	0	NA	NA	NA	NA	Not Reported	NA	dd35bb0d-544d-5f38-8d4a-686328081305	NA	NA	62	-22928	1945	NA	b013f724-bb63-5a75-9645-3c04c63712dc	Alive	not hispanic or latino	female	white	NA	NA	NA	Radiation Therapy, NOS
TCGA-A2-A0T0	Infiltrating duct carcinoma, NOS	not reported	M0	not reported	T2	Stage IIB	Breast, NOS	No	no	8500/3	C50.9	released	No	not reported	c6fdb823-317a-50ef-b5ae-60971ec595f3	Breast, NOS	533	NA	stage iib	2009	21575	2019-08-08T16:20:36.231004-05:00	NA	not reported	6th	N1	0	NA	NA	NA	NA	Not Reported	NA	47427d77-0f6c-57e9-b606-8a22cb709544	NA	NA	59	-21575	1950	NA	eb0c67a6-8152-558b-afc2-a0df0ffe606b	Alive	not hispanic or latino	female	white	NA	NA	NA	Radiation Therapy, NOS
TCGA-A2-A0T1	Infiltrating duct carcinoma, NOS	not reported	M0	not reported	T3	Stage IIIC	Breast, NOS	No	no	8500/3	C50.9	released	No	not reported	25505c8a-3a48-58ec-8315-acfc08908760	Breast, NOS	521	NA	stage iiic	2009	20227	2019-08-08T16:20:36.231004-05:00	NA	not reported	NA	N3	0	NA	NA	NA	NA	Not Reported	NA	cb0ddd9e-5b3e-5d61-83b2-280ce26953d0	NA	NA	55	-20227	1954	NA	f7da2574-2ab2-5aa5-b6bc-3604aea98986	Alive	not hispanic or latino	female	american indian or alaska native	NA	NA	NA	Radiation Therapy, NOS
TCGA-A2-A0T2	Infiltrating duct carcinoma, NOS	not reported	M1	not reported	T3	Stage IV	Breast, NOS	No	no	8500/3	C50.9	released	No	not reported	bd625494-cb6c-586a-a077-408918992bd6	Breast, NOS	NA	NA	stage iv	2009	24235	2019-08-08T16:20:36.231004-05:00	NA	not reported	NA	N3	0	NA	NA	NA	NA	Not Reported	NA	f36c6765-ef74-5e5a-8925-d3ea656d33b5	NA	NA	66	-24235	1943	2009	b356beeb-0241-56e8-9631-eb2b082d670b	Dead	not hispanic or latino	female	white	255	NA	NA	Radiation Therapy, NOS
TCGA-A2-A0T4	Lobular carcinoma, NOS	not reported	M0	not reported	T2	Stage IIA	Breast, NOS	No	no	8520/3	C50.9	released	No	not reported	b6eec82a-92ad-57ce-8dba-78e15be85f78	Breast, NOS	624	NA	stage iia	2009	22849	2019-08-08T16:20:36.231004-05:00	NA	not reported	NA	N0 (i-)	0	NA	NA	NA	NA	Not Reported	NA	3f05eae4-5ab8-5078-9536-bcfeadecc74d	NA	NA	62	-22849	1947	NA	25a3085b-1f0d-5766-b928-dc12e768f7f5	Alive	not hispanic or latino	female	white	NA	NA	NA	Radiation Therapy, NOS
TCGA-A2-A0T5	Infiltrating duct carcinoma, NOS	not reported	M0	not reported	T2	Stage IIA	Breast, NOS	No	no	8500/3	C50.9	released	No	not reported	70fc0c83-3d4a-553c-a8f9-30560282e1e2	Breast, NOS	531	NA	stage iia	2009	14503	2019-08-08T16:20:36.231004-05:00	NA	not reported	NA	N0 (i-)	0	NA	NA	NA	NA	Not Reported	NA	1de0f659-1d4c-5902-bc39-6806c512d631	NA	NA	39	-14503	1970	NA	fb332493-04a9-5b0c-95bc-75d686b6793f	Alive	not hispanic or latino	female	white	NA	NA	NA	Radiation Therapy, NOS
TCGA-A2-A0T6	Lobular carcinoma, NOS	not reported	M0	not reported	T3	Stage IIB	Breast, NOS	No	no	8520/3	C50.9	released	No	not reported	0a45af50-0452-5c32-b692-007a5f7559ec	Breast, NOS	575	NA	stage iib	2009	18334	2019-08-08T16:20:36.231004-05:00	NA	not reported	NA	N0 (i-)	0	NA	NA	NA	NA	Not Reported	NA	c756ea9c-1a0f-549c-9a19-2cd935b56974	NA	NA	50	-18334	1959	NA	972ef540-9777-5811-80d3-7447cea64c90	Alive	not hispanic or latino	female	white	NA	NA	NA	Radiation Therapy, NOS
TCGA-A2-A0YD	Lobular carcinoma, NOS	not reported	M0	not reported	T3	Stage IIB	Breast, NOS	No	no	8520/3	C50.9	released	No	not reported	a4d26fd9-7097-586c-b918-76ab86a2b7ef	Breast, NOS	769	NA	stage iib	2009	23021	2019-08-08T16:20:36.231004-05:00	NA	not reported	NA	N0 (i+)	0	NA	NA	NA	NA	Not Reported	NA	a00a3d7c-2289-5d4e-a42b-bad89275ae46	NA	NA	63	-23021	1946	NA	5cac060c-7d50-55df-8be8-430080c7a1d4	Alive	not hispanic or latino	female	white	NA	NA	NA	Radiation Therapy, NOS
TCGA-A2-A0YF	Infiltrating duct carcinoma, NOS	not reported	M0	not reported	T1b	Stage I	Breast, NOS	No	no	8500/3	C50.9	released	No	not reported	d87f8067-4941-5a6c-bcdc-194d7a0962a5	Breast, NOS	1535	NA	stage i	2009	24660	2019-08-08T16:20:36.231004-05:00	NA	not reported	6th	N0 (i+)	0	NA	NA	NA	NA	Not Reported	NA	b1b5a7c3-0ddf-56e7-a125-0953417dfd5b	NA	NA	67	-24660	1942	NA	a21d41bc-786f-5fbe-967c-21ebdb0fb887	Alive	not hispanic or latino	female	black or african american	NA	NA	NA	Radiation Therapy, NOS
TCGA-A2-A0YG	Infiltrating duct carcinoma, NOS	not reported	M0	not reported	T2	Stage IIIC	Breast, NOS	No	no	8500/3	C50.9	released	No	not reported	85b02c08-ddbd-592c-adf0-dbb770dbd102	Breast, NOS	666	NA	stage iiic	2009	23058	2019-08-08T16:20:36.231004-05:00	NA	not reported	NA	N3a	0	NA	NA	NA	NA	Not Reported	NA	5bfd8186-0974-5ef9-8703-c1e81c1e8138	NA	NA	63	-23058	1946	NA	bde81a64-013e-519b-a7ae-cbd254ccc911	Alive	not hispanic or latino	female	white	NA	NA	NA	Radiation Therapy, NOS
TCGA-A2-A0YH	Infiltrating duct carcinoma, NOS	not reported	M0	not reported	T2	Stage IIIA	Breast, NOS	No	no	8500/3	C50.9	released	No	not reported	8f5f01da-2808-5e24-9443-6931b6f7ddfa	Breast, NOS	659	NA	stage iiia	2009	19596	2019-08-08T16:20:36.231004-05:00	NA	not reported	NA	N2a	0	NA	NA	NA	NA	Not Reported	NA	5569b581-a47e-56cf-9a12-9bc165dfed24	NA	NA	53	-19596	1956	NA	f633a69e-f17f-563f-bd87-e026e80fcd54	Alive	not hispanic or latino	female	white	NA	NA	NA	Radiation Therapy, NOS
TCGA-A2-A0YI	Infiltrating duct and lobular carcinoma	not reported	M0	not reported	T1c	Stage I	Breast, NOS	No	no	8522/3	C50.9	released	No	not reported	06e9cb5f-e8a7-5e59-b2cb-a010a1dfc91a	Breast, NOS	1505	NA	stage i	2009	22961	2019-08-08T16:20:36.231004-05:00	NA	not reported	6th	N0 (i+)	0	NA	NA	NA	NA	Not Reported	NA	9ea780b6-4349-56d1-9092-d9c1338473b9	NA	NA	62	-22961	1947	NA	b30d0ea3-bbee-575b-b1d9-3ee659c71287	Alive	not hispanic or latino	female	white	NA	NA	NA	Radiation Therapy, NOS
TCGA-A2-A0YL	Lobular carcinoma, NOS	not reported	M0	not reported	T3	Stage IIIA	Breast, NOS	No	no	8520/3	C50.9	released	No	not reported	08e67af7-3bdb-56c2-bd26-8aeac62c2135	Breast, NOS	1474	NA	stage iiia	2010	17702	2019-08-08T16:20:36.231004-05:00	NA	not reported	NA	N2a	0	NA	NA	NA	NA	Not Reported	NA	23b6a296-e149-5801-aa20-e144ef683abe	NA	NA	48	-17702	1962	NA	55ae5a3b-e509-5fcd-98c9-c5007b448890	Alive	not hispanic or latino	female	white	NA	NA	NA	Radiation Therapy, NOS
TCGA-A2-A0YM	Infiltrating duct carcinoma, NOS	not reported	M0	not reported	T2	Stage IIA	Breast, NOS	No	no	8500/3	C50.9	released	No	not reported	80f1a217-cd47-59cf-b97b-5da7b589f059	Breast, NOS	965	NA	stage iia	2008	24831	2019-08-08T16:20:36.231004-05:00	NA	not reported	NA	N0 (i-)	0	NA	NA	NA	NA	Not Reported	NA	e3fae0e9-dfa2-53d8-8ab7-2805009f0555	NA	NA	67	-24831	1941	NA	88bcdd63-e259-5cee-978a-e71a177be8ca	Alive	not hispanic or latino	female	white	NA	NA	NA	Radiation Therapy, NOS
TCGA-A2-A0YT	Infiltrating duct carcinoma, NOS	not reported	M0	not reported	T4b	Stage IIIB	Breast, NOS	Yes	no	8500/3	C50.9	released	No	not reported	54ed2b5c-ab45-5b72-9b91-3e1b28e43d03	Breast, NOS	NA	NA	stage iiib	2008	20482	2019-08-08T16:20:36.231004-05:00	NA	not reported	NA	N2a	0	NA	NA	NA	NA	Not Reported	NA	469e082c-0368-52fa-8a42-2e1e899dda6d	NA	NA	56	-20482	1952	2009	480bf154-d75c-5646-a72c-85052b238480	Dead	not hispanic or latino	female	white	723	NA	NA	Radiation Therapy, NOS
TCGA-A2-A1FV	Lobular carcinoma, NOS	not reported	M0	not reported	T3	Stage IIB	Breast, NOS	No	no	8520/3	C50.9	released	No	not reported	f0334d7d-50a2-5437-b4fc-cbbf74f2fa48	Breast, NOS	714	NA	stage iib	2010	27287	2019-08-08T16:20:36.231004-05:00	NA	not reported	7th	N0 (i+)	0	NA	NA	NA	NA	Not Reported	NA	461cb5c2-3df7-56ae-8dee-c1b1eea1c0ab	NA	NA	74	-27287	1936	NA	3c5d758d-b7f5-56b6-94b8-b5b62eeb1077	Alive	not hispanic or latino	female	white	NA	NA	NA	Radiation Therapy, NOS
TCGA-A2-A1FW	Infiltrating duct carcinoma, NOS	not reported	M0	not reported	T3	Stage IIIA	Breast, NOS	No	no	8500/3	C50.9	released	No	not reported	13dc2e45-4c2f-5a39-9aab-16c0bb6318a4	Breast, NOS	528	NA	stage iiia	2010	22779	2019-08-08T16:20:36.231004-05:00	NA	not reported	7th	N2a	0	NA	NA	NA	NA	Not Reported	NA	f353ecf3-c5e5-571f-bae5-31fecbf0e79e	NA	NA	62	-22779	1948	NA	8ee173c0-3648-598e-8102-f47660f4232f	Alive	not hispanic or latino	female	white	NA	NA	NA	Radiation Therapy, NOS
TCGA-A2-A1FX	Infiltrating duct carcinoma, NOS	not reported	M0	not reported	T3	Stage IIIA	Breast, NOS	No	no	8500/3	C50.9	released	No	not reported	cbed4859-2d7f-5ab9-8907-49790d4c3ecf	Breast, NOS	1847	NA	stage iiia	2008	22344	2019-08-08T16:20:36.231004-05:00	NA	not reported	6th	N2a	0	NA	NA	NA	NA	Not Reported	NA	4c5dcdd8-2a09-5818-8d73-4435ae7fc1c1	NA	NA	61	-22344	1947	NA	8562ae2f-cac6-56d0-98d5-ec9125bd197a	Alive	not hispanic or latino	female	white	NA	NA	NA	Radiation Therapy, NOS
TCGA-A2-A1FZ	Infiltrating duct carcinoma, NOS	not reported	M0	not reported	T2	Stage IIA	Breast, NOS	No	no	8500/3	C50.9	released	No	not reported	0713f268-7738-54ed-8dc1-3e8fca07ecfb	Breast, NOS	683	NA	stage iia	2010	23055	2019-08-08T16:20:36.231004-05:00	NA	not reported	7th	N0 (i-)	0	NA	NA	NA	NA	Not Reported	NA	b900830a-510b-52ca-b5d0-edb986257f8c	NA	NA	63	-23055	1947	NA	941af4b4-81be-5dec-bc06-88449215ed79	Alive	not hispanic or latino	female	white	NA	NA	NA	Radiation Therapy, NOS
TCGA-A2-A1G0	Infiltrating duct carcinoma, NOS	not reported	M0	not reported	T2	Stage IIB	Breast, NOS	No	no	8500/3	C50.9	released	No	not reported	d914d6e2-9648-56cd-a5d0-83891db89fe3	Breast, NOS	616	NA	stage iib	2010	18002	2019-08-08T16:20:36.231004-05:00	NA	not reported	7th	N1a	0	NA	NA	NA	NA	Not Reported	NA	7292cc09-79d2-5f68-8877-285a66121996	NA	NA	49	-18002	1961	NA	8275e270-5cfb-552f-9ed4-1bd3f7653ec2	Alive	not hispanic or latino	female	white	NA	NA	NA	Radiation Therapy, NOS
TCGA-A2-A1G1	Infiltrating duct carcinoma, NOS	not reported	M0	not reported	T2	Stage IIB	Breast, NOS	No	no	8500/3	C50.9	released	No	not reported	a6877f4c-4d8c-5224-88c0-0dac5ecd7ac6	Breast, NOS	584	NA	stage iib	2010	31223	2019-08-08T16:20:36.231004-05:00	NA	not reported	7th	N1	0	NA	NA	NA	NA	Not Reported	NA	17c14c49-671a-5546-a5b3-655e76f6c765	NA	NA	85	-31223	1925	NA	61eece07-eea1-5e56-9c54-572db975077a	Alive	not hispanic or latino	female	white	NA	NA	NA	Radiation Therapy, NOS
TCGA-A2-A1G4	Infiltrating duct carcinoma, NOS	not reported	M0	not reported	T3	Stage IIIA	Breast, NOS	No	yes	8500/3	C50.9	released	Not Reported	not reported	45ee48b9-1dac-54d7-aed5-ce0606ba252e	Breast, NOS	595	NA	stage iiia	2010	25966	2019-08-08T16:20:36.231004-05:00	NA	not reported	7th	N1a	0	NA	NA	NA	NA	Not Reported	NA	62667205-2f00-57ed-98f7-740e58f8d34d	NA	NA	71	-25966	1939	NA	a14e794f-900e-5d31-bf1a-342cf600920d	Alive	not hispanic or latino	female	white	NA	NA	NA	Radiation Therapy, NOS
TCGA-A2-A259	Infiltrating duct carcinoma, NOS	not reported	M0	not reported	T1c	Stage I	Breast, NOS	No	no	8500/3	C50.9	released	No	not reported	efaf5840-53b3-5627-9cf5-2b95a1541489	Breast, NOS	1596	NA	stage i	2007	25666	2019-08-08T16:20:36.231004-05:00	NA	not reported	6th	N0 (i-)	0	NA	NA	NA	NA	Not Reported	NA	c7f1e847-06a9-59aa-9007-5b7760498bc3	NA	NA	70	-25666	1937	NA	59beeb2a-2ebb-55ef-a978-231ae7fa7b22	Alive	not hispanic or latino	female	black or african american	NA	NA	NA	Radiation Therapy, NOS
TCGA-A2-A25B	Infiltrating duct carcinoma, NOS	not reported	M0	not reported	T2	Stage IIB	Breast, NOS	No	no	8500/3	C50.9	released	No	not reported	ec682fa1-7758-5e06-a0ed-a62f3586b9af	Breast, NOS	1291	NA	stage iib	2010	14454	2019-08-08T16:21:06.649374-05:00	NA	not reported	7th	N1	0	NA	NA	NA	NA	Not Reported	NA	cbf01d2e-4e29-587a-90a3-3af2a8b00aa7	NA	NA	39	-14454	1971	NA	9cf9312c-6ae6-53f4-9c38-5aa85492e67a	Alive	not hispanic or latino	female	black or african american	NA	NA	NA	Radiation Therapy, NOS
TCGA-A2-A25C	Infiltrating duct carcinoma, NOS	not reported	M0	not reported	T2	Stage IIB	Breast, NOS	No	no	8500/3	C50.9	released	No	not reported	2bd418bb-9997-57a5-808c-af10df43ec0f	Breast, NOS	523	NA	stage iib	2010	18508	2019-08-08T16:21:06.649374-05:00	NA	not reported	7th	N1a	0	NA	NA	NA	NA	Not Reported	NA	8fd7c9e8-5065-5ab9-a931-c21f228fd235	NA	NA	50	-18508	1960	NA	62289a96-2a9b-5b40-96c6-7b36b1004b2b	Alive	not hispanic or latino	female	white	NA	NA	NA	Radiation Therapy, NOS
TCGA-A2-A25D	Lobular carcinoma, NOS	not reported	M0	not reported	T2	Stage IIIC	Breast, NOS	No	no	8520/3	C50.9	released	No	not reported	8d1f339f-5a28-56b4-b26c-557b605cf8cb	Breast, NOS	0	NA	stage iiic	2010	32872	2019-08-08T16:21:06.649374-05:00	NA	not reported	7th	N3a	0	NA	NA	NA	NA	Not Reported	NA	d5ca83c6-cfb7-54b4-ba9c-31ae58b4816e	NA	NA	90	-32872	1920	NA	7556b5ea-85b2-5183-87c2-65cbe43b9ed5	Alive	not hispanic or latino	female	white	NA	NA	NA	Radiation Therapy, NOS
TCGA-A2-A25E	Infiltrating duct carcinoma, NOS	not reported	M0	not reported	T2	Stage IIIA	Breast, NOS	No	no	8500/3	C50.9	released	No	not reported	b452dfc8-4942-5dcb-b376-5d9ff60036a7	Breast, NOS	3204	NA	stage iiia	2004	12601	2019-08-08T16:21:06.649374-05:00	NA	not reported	6th	N2a	0	NA	NA	NA	NA	Not Reported	NA	cc56b93c-6707-5970-abab-1dc06bdeee3f	NA	NA	34	-12601	1970	NA	f784d072-158a-5b75-91d9-a346d90fc067	Alive	not hispanic or latino	female	black or african american	NA	NA	NA	Radiation Therapy, NOS
TCGA-A2-A25F	Infiltrating duct carcinoma, NOS	not reported	M0	not reported	T2	Stage IIA	Breast, NOS	No	no	8500/3	C50.9	released	No	not reported	93288d03-001b-52f1-82c3-c46616dba7fa	Breast, NOS	322	NA	stage iia	2011	24319	2019-08-08T16:21:06.649374-05:00	NA	not reported	7th	N0 (i-)	0	NA	NA	NA	NA	Not Reported	NA	8bdec131-f815-5797-8363-aaaa21bc0184	NA	NA	66	-24319	1945	NA	ecd45d14-afea-5d69-b3b1-c0c21e1505c9	Alive	not hispanic or latino	female	white	NA	NA	NA	Radiation Therapy, NOS
TCGA-A2-A3KC	Lobular carcinoma, NOS	not reported	M0	not reported	T2	Stage IIB	Breast, NOS	No	no	8520/3	C50.9	released	No	not reported	2ac4538c-acd3-5977-b183-cb92b9262962	Breast, NOS	1102	NA	stage iib	2011	20401	2019-08-08T16:21:06.649374-05:00	NA	not reported	7th	N1a	0	NA	NA	NA	NA	Not Reported	NA	9cb8a424-6014-5fdd-baa2-172bc0ced961	NA	NA	55	-20401	1956	NA	f9684ce9-388d-5a4c-a26f-525e4566f818	Alive	not hispanic or latino	female	black or african american	NA	NA	NA	Radiation Therapy, NOS
TCGA-A2-A3KD	Mucinous adenocarcinoma	not reported	M0	not reported	T3	Stage IIIA	Breast, NOS	No	no	8480/3	C50.9	released	No	not reported	dab35b94-b3ee-5999-8d07-df439ac55900	Breast, NOS	1206	NA	stage iiia	2010	17372	2019-08-08T16:21:06.649374-05:00	NA	not reported	7th	N1mi	0	NA	NA	NA	NA	Not Reported	NA	db608e50-6a2a-569d-b415-c86a676b6230	NA	NA	47	-17372	1963	NA	dc5cd4cd-bd69-533d-9e81-9d9619e63dd0	Alive	not hispanic or latino	female	white	NA	NA	NA	Radiation Therapy, NOS
TCGA-A2-A3XS	Infiltrating duct carcinoma, NOS	not reported	M0	not reported	T1	Stage IIIA	Breast, NOS	No	no	8500/3	C50.9	released	No	not reported	0f0c5855-9f1d-5250-a755-c494d7ffbbfc	Breast, NOS	NA	NA	stage iiia	2003	23000	2019-08-08T16:21:06.649374-05:00	NA	not reported	6th	N2a	0	NA	NA	NA	NA	Not Reported	NA	f2be4f3a-65e4-5dab-8aef-eae31d7352c8	NA	NA	62	-23000	1941	2005	600a7af0-38e4-54a3-be53-ca07c90d2e8d	Dead	not hispanic or latino	female	black or african american	1032	NA	NA	Radiation Therapy, NOS
TCGA-A2-A3XT	Infiltrating duct carcinoma, NOS	not reported	M0	not reported	T2	Stage IIB	Breast, NOS	No	no	8500/3	C50.9	released	No	not reported	7ba99e9a-1644-5d31-addf-3d1186a86f48	Breast, NOS	2770	NA	stage iib	2006	16649	2019-08-08T16:21:06.649374-05:00	NA	not reported	6th	N1a	0	NA	NA	NA	NA	Not Reported	NA	ebf45a48-7ef9-5fe1-8fb5-3558014231f9	NA	NA	45	-16649	1961	NA	aa3cf547-bd9b-5583-bb1f-6a76acb61298	Alive	not hispanic or latino	female	black or african american	NA	NA	NA	Radiation Therapy, NOS
TCGA-A2-A3XU	Infiltrating duct carcinoma, NOS	not reported	M0	not reported	T2	Stage IIB	Breast, NOS	No	no	8500/3	C50.9	released	No	not reported	83397081-2951-5779-ac99-244b865edf7e	Breast, NOS	NA	NA	stage iib	2006	13046	2019-08-08T16:21:06.649374-05:00	NA	not reported	6th	N1mi	0	NA	NA	NA	NA	Not Reported	NA	a1a9085a-1cae-58d0-9478-af872803b3d9	NA	NA	35	-13046	1971	2008	f2c2139b-72f4-5677-9b0c-624e13830ccf	Dead	not hispanic or latino	female	black or african american	912	NA	NA	Radiation Therapy, NOS
TCGA-A2-A3XV	Infiltrating duct carcinoma, NOS	not reported	M0	not reported	T2	Stage IIA	Breast, NOS	No	no	8500/3	C50.9	released	No	not reported	0d8ef45d-7d93-581c-9b73-f26a67673795	Breast, NOS	996	NA	stage iia	2011	16971	2019-08-08T16:21:06.649374-05:00	NA	not reported	7th	N0	0	NA	NA	NA	NA	Not Reported	NA	9f00ea9d-722f-5007-9197-1373d28a7973	NA	NA	46	-16971	1965	NA	ae6f05d9-eb0b-5ae8-aa14-ea17cc3f198c	Alive	not hispanic or latino	female	black or african american	NA	NA	NA	Radiation Therapy, NOS
TCGA-A2-A3XX	Infiltrating duct carcinoma, NOS	not reported	M0	not reported	T2	Stage IIA	Breast, NOS	No	no	8500/3	C50.9	released	No	not reported	b08195c5-0ead-5621-b8bd-273604844ebd	Breast, NOS	1168	NA	stage iia	2009	17981	2019-08-08T16:21:06.649374-05:00	NA	not reported	7th	N0	0	NA	NA	NA	NA	Not Reported	NA	67ee4fc7-7d2f-5ec5-a177-cb555f2b659b	NA	NA	49	-17981	1960	NA	e54b6e0e-f16f-59b1-b81c-6ca4385d86c0	Dead	not hispanic or latino	female	black or african american	1439	NA	NA	Radiation Therapy, NOS
TCGA-A2-A3XY	Infiltrating duct carcinoma, NOS	not reported	M0	not reported	T2	Stage IIB	Breast, NOS	No	no	8500/3	C50.9	released	No	not reported	1f0912d3-4899-5871-bc2b-007f9bf8ca10	Breast, NOS	1064	NA	stage iib	2010	18059	2019-08-08T16:21:06.649374-05:00	NA	not reported	7th	N1a	0	NA	NA	NA	NA	Not Reported	NA	9aa5cc63-cea8-546c-bedd-7548af5490b6	NA	NA	49	-18059	1961	NA	ac6eba06-6e54-5be8-a51b-29d8bdce3718	Dead	not hispanic or latino	female	black or african american	1093	NA	NA	Radiation Therapy, NOS
TCGA-A2-A3XZ	Infiltrating duct carcinoma, NOS	not reported	M0	not reported	T1c	Stage I	Breast, NOS	No	no	8500/3	C50.9	released	No	not reported	1662da6d-5eb6-5892-80d5-b391d489f17d	Breast, NOS	1532	NA	stage i	2009	16978	2019-08-08T16:21:06.649374-05:00	NA	not reported	6th	N0	0	NA	NA	NA	NA	Not Reported	NA	4222a617-4e41-5c5b-bb17-448e71eebd42	NA	NA	46	-16978	1963	NA	950c1911-2466-5e9c-9953-768bd9b6d840	Alive	not hispanic or latino	female	black or african american	NA	NA	NA	Radiation Therapy, NOS
TCGA-A2-A3Y0	Infiltrating duct carcinoma, NOS	not reported	M0	not reported	T2	Stage IIB	Breast, NOS	No	no	8500/3	C50.9	released	No	not reported	e018901a-1caa-5fc1-b228-37e678702551	Breast, NOS	1546	NA	stage iib	2010	21024	2019-08-08T16:21:06.649374-05:00	NA	not reported	7th	N1a	0	NA	NA	NA	NA	Not Reported	NA	0591e0c7-1c51-58b1-bffa-9ab8ebe278b2	NA	NA	57	-21024	1953	NA	7b1829e5-7c8e-5740-8737-089b2ac559b8	Alive	not hispanic or latino	female	black or african american	NA	NA	NA	Radiation Therapy, NOS
TCGA-A2-A4RW	Lobular carcinoma, NOS	not reported	M0	not reported	T2	Stage IIIC	Breast, NOS	No	no	8520/3	C50.9	released	No	not reported	f39995a9-04eb-5a43-be52-ac5248446363	Breast, NOS	222	NA	stage iiic	2011	18060	2019-08-08T16:21:06.649374-05:00	NA	not reported	7th	N3a	0	NA	NA	NA	NA	Not Reported	NA	532679eb-429c-58c7-9ca3-03c738a417e2	NA	NA	49	-18060	1962	NA	d71f08e2-cc65-5700-98dd-de279b7bc69f	Alive	not hispanic or latino	female	white	NA	NA	NA	Radiation Therapy, NOS
TCGA-A2-A4RX	Metaplastic carcinoma, NOS	not reported	M0	not reported	T2	Stage IIA	Breast, NOS	No	no	8575/3	C50.9	released	No	not reported	f2ca83f1-5803-5925-8e57-47af81c3f837	Breast, NOS	742	NA	stage iia	2012	24779	2019-08-08T16:21:06.649374-05:00	NA	not reported	7th	N0	0	NA	NA	NA	NA	Not Reported	NA	e9051880-801e-52ca-a3cb-730b266f8ef1	NA	NA	67	-24779	1945	NA	007a0c84-b279-57bb-b5b2-c9f84372ef9f	Alive	not hispanic or latino	female	black or african american	NA	NA	NA	Radiation Therapy, NOS
TCGA-A2-A4S0	Mucinous adenocarcinoma	not reported	M0	not reported	T2	Stage IIA	Breast, NOS	No	no	8480/3	C50.9	released	No	not reported	f311535d-a771-514a-95b2-710d610a456c	Breast, NOS	706	NA	stage iia	2012	28416	2019-08-08T16:21:06.649374-05:00	NA	not reported	7th	N0	0	NA	NA	NA	NA	Not Reported	NA	58e195b4-e5d0-5ba0-bee6-767a8063638c	NA	NA	77	-28416	1935	NA	98e008d6-535e-54ea-9336-48f7bf40ae75	Alive	not hispanic or latino	female	white	NA	NA	NA	Radiation Therapy, NOS
TCGA-A2-A4S1	Metaplastic carcinoma, NOS	not reported	M0	not reported	T2	Stage IIA	Breast, NOS	No	no	8575/3	C50.9	released	No	not reported	40e47fe9-2307-5efc-a5a8-43fdc86e612a	Breast, NOS	820	NA	stage iia	2012	24353	2019-08-08T16:21:06.649374-05:00	NA	not reported	7th	N0	0	NA	NA	NA	NA	Not Reported	NA	a22f1a6f-8179-5412-9f4c-a56196e247c0	NA	NA	66	-24353	1946	NA	6b6a9495-1341-5890-a42d-d966b148c7db	Alive	not hispanic or latino	female	white	NA	NA	NA	Radiation Therapy, NOS
TCGA-A2-A4S2	Infiltrating lobular mixed with other types of carcinoma	not reported	M0	not reported	T3	Stage IIIA	Breast, NOS	No	no	8524/3	C50.9	released	No	not reported	6c6c6a12-dfc3-523a-8a0d-28fa728e4385	Breast, NOS	643	NA	stage iiia	2012	22936	2019-08-08T16:21:06.649374-05:00	NA	not reported	7th	N2	0	NA	NA	NA	NA	Not Reported	NA	904047e7-5618-5f6a-ad36-6fa478d201c0	NA	NA	62	-22936	1950	NA	2f85cd8d-55e8-59f8-a1ed-e6d046d5449c	Alive	not hispanic or latino	female	white	NA	NA	NA	Radiation Therapy, NOS
TCGA-A2-A4S3	Infiltrating duct carcinoma, NOS	not reported	M0	not reported	T2	Stage IIB	Breast, NOS	No	no	8500/3	C50.9	released	No	not reported	5923a5f8-1267-535b-8707-4380714ea034	Breast, NOS	666	NA	stage iib	2012	21762	2019-08-08T16:21:06.649374-05:00	NA	not reported	7th	N1a	0	NA	NA	NA	NA	Not Reported	NA	7f30a16c-a243-5888-8491-c20f9bb2765d	NA	NA	59	-21762	1953	NA	a39d723b-df16-5dc5-8c0b-9d40ca9028a9	Alive	not hispanic or latino	female	black or african american	NA	NA	NA	Radiation Therapy, NOS
TCGA-A7-A0CE	Infiltrating duct carcinoma, NOS	not reported	M0	not reported	T2	Stage IIA	Breast, NOS	No	no	8500/3	C50.9	released	No	not reported	31cd9b9e-e5c2-5799-a53a-ca7793c5bed3	Breast, NOS	1074	NA	stage iia	2009	20863	2019-08-08T16:21:06.649374-05:00	NA	not reported	NA	N0 (i-)	0	NA	NA	NA	NA	Not Reported	NA	d48a5ecd-12fe-5934-af8f-723fd5bef21d	NA	NA	57	-20863	1952	NA	67e5d3f8-1398-54cd-8dd7-b9537b5fc108	Alive	not hispanic or latino	female	white	NA	NA	NA	Radiation Therapy, NOS
TCGA-A7-A0D9	Infiltrating duct carcinoma, NOS	not reported	M0	not reported	T2	Stage IIA	Breast, NOS	No	no	8500/3	C50.9	released	No	not reported	7b616216-b32a-535b-b981-319cc70d0962	Breast, NOS	1139	NA	stage iia	2009	13836	2019-08-08T16:21:06.649374-05:00	NA	not reported	NA	N0 (i-)	0	NA	NA	NA	NA	Not Reported	NA	b127ffdc-1e64-52cf-ae8a-0f29581346ac	NA	NA	37	-13836	1972	NA	1f90ebab-6c3e-5aa9-9cfa-ee596b4f71ff	Alive	not hispanic or latino	female	white	NA	NA	NA	Radiation Therapy, NOS
TCGA-A7-A0DB	Infiltrating duct carcinoma, NOS	not reported	M0	not reported	T2	Stage IIA	Breast, NOS	No	no	8500/3	C50.9	released	No	not reported	0b4e8000-6329-58fc-aa9d-14732e7636ca	Breast, NOS	1007	NA	stage iia	2009	20570	2019-08-08T16:21:06.649374-05:00	NA	not reported	NA	N0 (i-)	0	NA	NA	NA	NA	Not Reported	NA	48dce2cd-9537-5bf6-958c-5bfbd331fb82	NA	NA	56	-20570	1953	NA	5f43be5d-f1b5-5df5-a708-83ece49814e2	Alive	not hispanic or latino	female	white	NA	NA	NA	Radiation Therapy, NOS
TCGA-A7-A13D	Infiltrating duct carcinoma, NOS	not reported	M0	not reported	T2	Stage IIA	Breast, NOS	No	no	8500/3	C50.9	released	No	not reported	c1c9d637-73fb-53a3-a529-8597fd532db2	Breast, NOS	965	NA	stage iia	2010	17070	2019-08-08T16:21:06.649374-05:00	NA	not reported	NA	N0 (i-)	0	NA	NA	NA	NA	Not Reported	NA	55c789e6-7c2f-5341-b55e-ea2bd97344a2	NA	NA	46	-17070	1964	NA	89b768dc-7db6-56df-a9a9-1dd1832e3a8b	Alive	not hispanic or latino	female	black or african american	NA	NA	NA	Radiation Therapy, NOS
TCGA-A7-A13E	Infiltrating duct carcinoma, NOS	not reported	MX	not reported	T2	Stage IIB	Breast, NOS	No	no	8500/3	C50.9	released	No	not reported	9b9bc72f-6c73-51ad-a4d4-cbb62d5313bf	Breast, NOS	326	NA	stage iib	2010	22690	2019-08-08T16:21:06.649374-05:00	NA	not reported	NA	N1	0	NA	NA	NA	NA	Not Reported	NA	7b28dd80-25f8-59fe-b7e3-bf0f056db530	NA	NA	62	-22690	1948	NA	d492d639-2439-50c4-adf8-ea022e39a530	Dead	not hispanic or latino	female	white	614	NA	NA	Radiation Therapy, NOS
TCGA-A7-A13F	Infiltrating duct carcinoma, NOS	not reported	M0	not reported	T3	Stage IIIA	Breast, NOS	No	no	8500/3	C50.9	released	No	not reported	750f17ca-a068-5b78-a8ca-60bb156751b4	Breast, NOS	765	NA	stage iiia	2010	16363	2019-08-08T16:21:06.649374-05:00	NA	not reported	NA	N1a	0	NA	NA	NA	NA	Not Reported	NA	30fa5864-f1c9-5d3e-96f8-855b63f5c753	NA	NA	44	-16363	1966	NA	e4ded02b-0976-501a-aa4d-df15fd7c387a	Alive	not hispanic or latino	female	white	NA	NA	NA	Radiation Therapy, NOS
TCGA-A7-A13G	Infiltrating duct carcinoma, NOS	not reported	MX	not reported	T2	Stage IIA	Breast, NOS	No	yes	8500/3	C50.9	released	Not Reported	not reported	9d634a95-7e29-5de2-9534-741258169ab6	Breast, NOS	718	NA	stage iia	2010	28969	2019-08-08T16:21:06.649374-05:00	NA	not reported	7th	N0	0	NA	NA	NA	NA	Not Reported	NA	03d5f20a-864e-5585-8044-a467c7d5d1e9	NA	NA	79	-28969	1931	NA	0887b084-fdcc-50ea-b50e-75246954a6d3	Alive	not hispanic or latino	female	white	NA	NA	NA	Radiation Therapy, NOS
TCGA-A7-A13H	Lobular carcinoma, NOS	not reported	MX	not reported	T2	Stage IIB	Breast, NOS	No	no	8520/3	C50.9	released	No	not reported	03d50a8e-3f4a-5362-aa26-8de2256d2ea5	Breast, NOS	899	NA	stage iib	2010	22643	2019-08-08T16:21:06.649374-05:00	NA	not reported	7th	N1a	0	NA	NA	NA	NA	Not Reported	NA	c5cc7e73-27ac-5f92-a2fa-c58315e05bf3	NA	NA	61	-22643	1949	NA	ae6b5810-0e72-589e-9899-7b29d60cf111	Alive	not hispanic or latino	female	white	NA	NA	NA	Radiation Therapy, NOS
TCGA-A7-A26G	Metaplastic carcinoma, NOS	not reported	M0	not reported	T2	Stage IIA	Breast, NOS	No	no	8575/3	C50.9	released	No	not reported	92a4584a-7129-5096-9291-1ec68d3c26a3	Breast, NOS	722	NA	stage iia	2010	18362	2019-08-08T16:21:06.649374-05:00	NA	not reported	7th	N0 (i+)	0	NA	NA	NA	NA	Not Reported	NA	15c75d63-f18e-5013-86e9-d03bef656533	NA	NA	50	-18362	1960	NA	3fa3e508-a2b7-520a-997a-9fae3ffa0301	Alive	not hispanic or latino	female	black or african american	NA	NA	NA	Radiation Therapy, NOS
TCGA-A7-A26H	Infiltrating duct carcinoma, NOS	not reported	M0	not reported	T1	Stage IIA	Breast, NOS	No	yes	8500/3	C50.9	released	Not Reported	not reported	eba7a3e6-819f-58cf-886b-dc8e1d14d5a1	Breast, NOS	724	NA	stage iia	2011	26423	2019-08-08T16:21:06.649374-05:00	NA	not reported	7th	N1a	0	NA	NA	NA	NA	Not Reported	NA	5e46a41a-dd57-59e0-89f8-c8dd97f23f43	NA	NA	72	-26423	1939	NA	b411daf8-7c4c-58c7-8e5c-00f97fe18db4	Alive	not hispanic or latino	female	white	NA	NA	NA	Radiation Therapy, NOS
TCGA-A7-A3IY	Mucinous adenocarcinoma	not reported	M0	not reported	T1c	Stage I	Breast, NOS	No	no	8480/3	C50.9	released	No	not reported	06575088-9d96-50c4-afd3-66bc0800b798	Breast, NOS	345	NA	stage i	2011	26042	2019-08-08T16:21:06.649374-05:00	NA	not reported	7th	N0	0	NA	NA	NA	NA	Not Reported	NA	686f32e7-f982-55ee-868a-50c6a998ea4c	NA	NA	71	-26042	1940	NA	8c483a49-be0b-59e6-b275-a54d3a982f27	Alive	not hispanic or latino	female	white	NA	NA	NA	Radiation Therapy, NOS
TCGA-A7-A3IZ	Lobular carcinoma, NOS	not reported	M0	not reported	T2	Stage IIA	Breast, NOS	No	no	8520/3	C50.9	released	No	not reported	12d205f4-4a52-59b8-a397-86bd28deed7c	Breast, NOS	322	NA	stage iia	2011	22997	2019-08-08T16:21:06.649374-05:00	NA	not reported	7th	N0 (i+)	0	NA	NA	NA	NA	Not Reported	NA	6ad82908-a7ab-59fc-9076-33e0bbec59e3	NA	NA	62	-22997	1949	NA	70eb31ef-cc25-5f36-b4d6-08a3aeb5b40f	Alive	not hispanic or latino	female	white	NA	NA	NA	Radiation Therapy, NOS
TCGA-A7-A3J0	Mucinous adenocarcinoma	not reported	M0	not reported	T2	Stage IIA	Breast, NOS	No	no	8480/3	C50.9	released	No	not reported	c21fb1a4-e4c4-5d3a-82a1-fa21d07665fb	Breast, NOS	313	NA	stage iia	2011	22672	2019-08-08T16:21:06.649374-05:00	NA	not reported	7th	N0	0	NA	NA	NA	NA	Not Reported	NA	e3505f88-2643-5f2c-a325-0ecb12ec0ead	NA	NA	62	-22672	1949	NA	867de906-9957-57a0-90b8-6df15027c060	Alive	not hispanic or latino	female	white	NA	NA	NA	Radiation Therapy, NOS
TCGA-A7-A3J1	Lobular carcinoma, NOS	not reported	MX	not reported	T1c	Stage IA	Breast, NOS	No	yes	8520/3	C50.9	released	Not Reported	not reported	88a37fee-72f0-5271-ab80-03744c6bed88	Breast, NOS	343	NA	stage ia	2011	23209	2019-08-08T16:21:06.649374-05:00	NA	not reported	7th	N0	0	NA	NA	NA	NA	Not Reported	NA	738d4dc3-e3ca-5f72-bd12-26214acd0cf0	NA	NA	63	-23209	1948	NA	a0208447-14ca-5bea-8fda-b0b1f88ef48e	Alive	not hispanic or latino	female	white	NA	NA	NA	Radiation Therapy, NOS
TCGA-A7-A3RF	Mucinous adenocarcinoma	not reported	M0	not reported	T2	Stage IIA	Breast, NOS	No	no	8480/3	C50.9	released	No	not reported	a6abfb6e-2a7d-5a9b-9667-dcb82529376c	Breast, NOS	408	NA	stage iia	2012	29184	2019-08-08T16:21:06.649374-05:00	NA	not reported	7th	N0	0	NA	NA	NA	NA	Not Reported	NA	202a89ba-8f9d-50bc-882d-66a98efbe64c	NA	NA	79	-29184	1933	NA	b0ada515-3508-5254-9ab6-02448c654b83	Alive	not hispanic or latino	female	white	NA	NA	NA	Radiation Therapy, NOS
TCGA-A7-A425	Lobular carcinoma, NOS	not reported	MX	not reported	T3	Stage IIIC	Breast, NOS	No	no	8520/3	C50.9	released	No	not reported	b6634037-55dd-5ecc-b74a-009069ca3f68	Breast, NOS	447	NA	stage iiic	2012	25678	2019-08-08T16:21:32.660138-05:00	NA	not reported	7th	N3a	0	NA	NA	NA	NA	Not Reported	NA	b0ba0939-e72b-50a4-9a9b-ce1a1f2f1cec	NA	NA	70	-25678	1942	NA	d86f6968-aaea-5cb5-b928-067f6ae4c4a8	Alive	not hispanic or latino	female	white	NA	NA	NA	Radiation Therapy, NOS
TCGA-A7-A426	Lobular carcinoma, NOS	not reported	MX	not reported	T3	Stage IIIC	Breast, NOS	No	yes	8520/3	C50.9	released	Not Reported	not reported	68080695-84d9-51ce-a2a2-9491d373c7e4	Breast, NOS	364	NA	stage iiic	2012	18296	2019-08-08T16:21:32.660138-05:00	NA	not reported	7th	N3a	0	NA	NA	NA	NA	Not Reported	NA	a021a9a9-93a7-5189-8f3e-2502400d2914	NA	NA	50	-18296	1962	NA	4dc9818e-03a9-521a-ba56-c64e675bb934	Alive	not hispanic or latino	female	white	NA	NA	NA	Radiation Therapy, NOS
TCGA-A7-A4SA	Lobular carcinoma, NOS	not reported	M0	not reported	T2	Stage IIB	Breast, NOS	No	no	8520/3	C50.9	released	No	not reported	5073fe93-2bd3-5bbe-bd8a-25550a91a5e3	Breast, NOS	454	NA	stage iib	2012	14906	2019-08-08T16:21:32.660138-05:00	NA	not reported	7th	N1a	0	NA	NA	NA	NA	Not Reported	NA	e2de0ad0-090f-5431-bf98-b09d50d954f2	NA	NA	40	-14906	1972	NA	7a0ddc52-1c24-5eef-9534-1ac4d6b1a17d	Alive	not hispanic or latino	female	white	NA	NA	NA	Radiation Therapy, NOS
TCGA-A7-A4SB	Lobular carcinoma, NOS	not reported	M0	not reported	T3	Stage IIIA	Breast, NOS	No	no	8520/3	C50.9	released	No	not reported	85cab610-73df-56b4-9b55-6b76f4136d30	Breast, NOS	418	NA	stage iiia	2012	20539	2019-08-08T16:21:32.660138-05:00	NA	not reported	7th	N1mi	0	NA	NA	NA	NA	Not Reported	NA	08edc95c-e095-59fc-aca1-9adf099d0d8a	NA	NA	56	-20539	1956	NA	6d6bd78c-eab2-5a68-9558-dc17bfa6b887	Alive	not hispanic or latino	female	white	NA	NA	NA	Radiation Therapy, NOS
TCGA-A7-A4SC	Lobular carcinoma, NOS	not reported	MX	not reported	T3	Stage IIB	Breast, NOS	No	no	8520/3	C50.9	released	No	not reported	ff2a6285-db9a-5dfe-88a7-0d4cd54b6854	Breast, NOS	446	NA	stage iib	2012	23008	2019-08-08T16:21:32.660138-05:00	NA	not reported	7th	N0	0	NA	NA	NA	NA	Not Reported	NA	ba264cb4-10e0-5a5d-a10d-6955a20063c5	NA	NA	62	-23008	1950	NA	847e8b6f-52f1-5d46-b607-c17d29804cee	Alive	not hispanic or latino	female	white	NA	NA	NA	Radiation Therapy, NOS
TCGA-A7-A4SD	Infiltrating duct carcinoma, NOS	not reported	M0	not reported	T2	Stage IIA	Breast, NOS	No	no	8500/3	C50.9	released	No	not reported	472813c1-d092-5aad-b28a-a61679929f38	Breast, NOS	441	NA	stage iia	2012	19131	2019-08-08T16:21:32.660138-05:00	NA	not reported	7th	N0	0	NA	NA	NA	NA	Not Reported	NA	057077d0-b0fc-5336-b154-2110418786db	NA	NA	52	-19131	1960	NA	914bf5b8-34d2-5f41-a02a-79ff3492905e	Alive	not hispanic or latino	female	black or african american	NA	NA	NA	Radiation Therapy, NOS
TCGA-A7-A4SE	Infiltrating duct carcinoma, NOS	not reported	M0	not reported	T2	Stage IIA	Breast, NOS	No	no	8500/3	C50.9	released	No	not reported	3736076a-bd3b-5d9d-bd7f-74d4c9e84310	Breast, NOS	644	NA	stage iia	2011	20080	2019-08-08T16:21:32.660138-05:00	NA	not reported	7th	N0	0	NA	NA	NA	NA	Not Reported	NA	6b1d62a2-fef6-56a0-8f6c-e32d6238087b	NA	NA	54	-20080	1957	NA	bec8295a-826f-5037-812d-a1787073e86c	Alive	not hispanic or latino	female	black or african american	NA	NA	NA	Radiation Therapy, NOS
TCGA-A7-A4SF	Infiltrating duct carcinoma, NOS	not reported	M0	not reported	T2	Stage IIA	Breast, NOS	No	no	8500/3	C50.9	released	No	not reported	0c03df8f-1136-53ba-93c0-a01996a17623	Breast, NOS	545	NA	stage iia	2012	19985	2019-08-08T16:21:32.660138-05:00	NA	not reported	7th	N0	0	NA	NA	NA	NA	Not Reported	NA	2baa78bc-c7b0-5aa5-a7b8-736ef05d5b2a	NA	NA	54	-19985	1958	NA	535868e2-d228-5345-bf98-c8f99f953465	Alive	not hispanic or latino	female	black or african american	NA	NA	NA	Radiation Therapy, NOS
TCGA-A7-A56D	Infiltrating duct carcinoma, NOS	not reported	M0	not reported	T2	Stage IIA	Breast, NOS	No	no	8500/3	C50.9	released	No	not reported	bdaa1461-31b3-5b7e-b21f-2b7557a1e34e	Breast, NOS	448	NA	stage iia	2012	30783	2019-08-08T16:21:32.660138-05:00	NA	not reported	7th	N0	0	NA	NA	NA	NA	Not Reported	NA	5151601a-980d-5ba1-9316-261d85a37322	NA	NA	84	-30783	1928	NA	6ae291aa-b9c4-5f87-880b-8246ef811cec	Alive	not hispanic or latino	female	black or african american	NA	NA	NA	Radiation Therapy, NOS
TCGA-A7-A5ZV	Carcinoma, NOS	not reported	M0	not reported	T2	Stage IIA	Breast, NOS	No	no	8010/3	C50.9	released	No	not reported	38b90558-e498-5cd6-a83a-18cfd7dbcb0b	Breast, NOS	368	NA	stage iia	2012	22966	2019-08-08T16:21:32.660138-05:00	NA	not reported	7th	N0	0	NA	NA	NA	NA	Not Reported	NA	31374d68-56a3-5fc3-83dc-d97707ea070f	NA	NA	62	-22966	1950	NA	1b170bd5-55e1-54ea-b3d9-3396c617e366	Alive	not hispanic or latino	female	black or african american	NA	NA	NA	Radiation Therapy, NOS
TCGA-A7-A5ZW	Infiltrating duct carcinoma, NOS	not reported	M0	not reported	T1c	Stage IIA	Breast, NOS	No	no	8500/3	C50.9	released	No	not reported	a444e7e1-aa88-580b-a681-102b6e7ae086	Breast, NOS	326	NA	stage iia	2012	17529	2019-08-08T16:21:32.660138-05:00	NA	not reported	7th	N1a	0	NA	NA	NA	NA	Not Reported	NA	3a93a5be-394d-5f1a-8f9a-6cdbf7fe1e30	NA	NA	47	-17529	1965	NA	91cca0ff-6d07-5b98-9d06-2e63468be117	Alive	not hispanic or latino	female	black or african american	NA	NA	NA	Radiation Therapy, NOS
TCGA-A7-A5ZX	Lobular carcinoma, NOS	not reported	M0	not reported	T2	Stage IIIC	Breast, NOS	No	yes	8520/3	C50.9	released	Not Reported	not reported	cd464e2a-20b7-5361-acfa-edece41b8a5d	Breast, NOS	336	NA	stage iiic	2012	17683	2019-08-08T16:21:32.660138-05:00	NA	not reported	7th	N3a	0	NA	NA	NA	NA	Not Reported	NA	1869e944-909b-5472-a645-f570f9203f72	NA	NA	48	-17683	1964	NA	39b3b758-23cc-566a-b95c-29b39d64e402	Alive	not hispanic or latino	female	white	NA	NA	NA	Radiation Therapy, NOS
TCGA-A7-A6VV	Infiltrating duct carcinoma, NOS	not reported	M0	not reported	T2	Stage IIA	Breast, NOS	No	no	8500/3	C50.9	released	No	not reported	7f6cb966-49fb-53ae-a68c-db06b3544a4c	Breast, NOS	313	NA	stage iia	2013	18695	2019-08-08T16:21:32.660138-05:00	NA	not reported	7th	N0	0	NA	NA	NA	NA	Not Reported	NA	a67202fb-d609-5884-aa62-19af8a4a7192	NA	NA	51	-18695	1962	NA	668da5ee-8339-510f-a495-ae4f0ff55bdd	Alive	not hispanic or latino	female	black or african american	NA	NA	NA	Radiation Therapy, NOS
TCGA-A7-A6VW	Infiltrating duct carcinoma, NOS	not reported	M0	not reported	T2	Stage IIA	Breast, NOS	No	no	8500/3	C50.9	released	No	not reported	6c01830c-6c34-5e7d-b20d-2ff46ef7b832	Breast, NOS	285	NA	stage iia	2013	17539	2019-08-08T16:21:32.660138-05:00	NA	not reported	7th	N0	0	NA	NA	NA	NA	Not Reported	NA	d3779134-b168-5122-be33-f06e4ea5d17a	NA	NA	48	-17539	1965	NA	ea0933b7-11d7-54ca-8867-57ada3685701	Alive	not hispanic or latino	female	black or african american	NA	NA	NA	Radiation Therapy, NOS
TCGA-A7-A6VX	Infiltrating duct carcinoma, NOS	not reported	M0	not reported	T2	Stage IIA	Breast, NOS	No	no	8500/3	C50.9	released	No	not reported	1189745e-6a2a-5868-ba2c-a02b34e6a721	Breast, NOS	317	NA	stage iia	2013	25066	2019-08-08T16:21:32.660138-05:00	NA	not reported	7th	N0	0	NA	NA	NA	NA	Not Reported	NA	a6f9eb0a-33ab-5d54-b89a-0b2851ed27f3	NA	NA	68	-25066	1945	NA	f2f833a9-1f41-5c53-b2e5-96aeca576646	Alive	not hispanic or latino	female	black or african american	NA	NA	NA	Radiation Therapy, NOS
TCGA-A7-A6VY	Infiltrating duct carcinoma, NOS	not reported	M0	not reported	T2	Stage IIB	Breast, NOS	No	no	8500/3	C50.9	released	No	not reported	887e60a3-abe4-54de-ac97-1a63360a7840	Breast, NOS	266	NA	stage iib	2013	17640	2019-08-08T16:21:32.660138-05:00	NA	not reported	7th	N1	0	NA	NA	NA	NA	Not Reported	NA	8844ce70-3608-52f9-9714-7efff6be22c7	NA	NA	48	-17640	1965	NA	929b4c07-008d-595e-95e5-9a01efd93cda	Alive	not hispanic or latino	female	black or african american	NA	NA	NA	Radiation Therapy, NOS
TCGA-A8-A075	Infiltrating duct carcinoma, NOS	not reported	M0	not reported	T2	Stage IIB	Breast, NOS	No	no	8500/3	C50.9	released	No	not reported	c10f49ee-1f1c-56b9-84ff-d5ab7d0726ce	Breast, NOS	518	NA	stage iib	2009	15369	2019-08-08T16:21:32.660138-05:00	NA	not reported	6th	N1a	0	NA	NA	NA	NA	Not Reported	NA	d4496bee-e4b9-5906-bd34-3b823bd213e1	NA	NA	42	-15369	1967	NA	57ac482a-24fe-5979-983d-0642b5ff164c	Alive	not reported	female	not reported	NA	NA	NA	Radiation Therapy, NOS
TCGA-A8-A08O	Infiltrating duct carcinoma, NOS	not reported	M1	not reported	T2	Stage IV	Breast, NOS	No	no	8500/3	C50.9	released	No	not reported	5da011f6-f1ba-5d45-bcd8-84294424b522	Breast, NOS	943	NA	stage iv	2008	16681	2019-08-08T16:22:07.499730-05:00	NA	not reported	6th	N3a	0	NA	NA	NA	NA	Not Reported	NA	5d41e098-5672-5928-ab12-ec53a141a23a	NA	NA	45	-16681	1963	NA	0bc6dd2d-8e53-5aa5-917f-76c19193e80e	Alive	not reported	female	not reported	NA	NA	NA	Radiation Therapy, NOS
TCGA-A8-A0A6	Lobular carcinoma, NOS	not reported	M0	not reported	T2	Stage IIIC	Breast, NOS	No	no	8520/3	C50.9	released	No	not reported	253d7515-7cf5-5304-b38c-ba95e67fe2da	Breast, NOS	640	NA	stage iiic	2009	23404	2019-08-08T16:22:07.499730-05:00	NA	not reported	6th	N3a	0	NA	NA	NA	NA	Not Reported	NA	ac9d6451-d785-5c25-b66c-ab64a54d9612	NA	NA	64	-23404	1945	NA	96912ba4-ceea-52a0-93e5-fc755fb02ee3	Alive	not reported	female	not reported	NA	NA	NA	Radiation Therapy, NOS
TCGA-A8-A0AD	Infiltrating duct and lobular carcinoma	not reported	M0	not reported	T1c	Stage I	Breast, NOS	No	no	8522/3	C50.9	released	No	not reported	d1a42efd-d024-53fd-a35f-8db60def2ba6	Breast, NOS	1157	NA	stage i	2007	30407	2019-08-08T16:22:07.499730-05:00	NA	not reported	6th	N0	0	NA	NA	NA	NA	Not Reported	NA	4c528ffa-5c41-552d-9fba-fc07a8c68490	NA	NA	83	-30407	1924	NA	4dc16bc1-f554-5ec7-b059-6a0c1d7d3ac1	Alive	not reported	female	not reported	NA	NA	NA	Radiation Therapy, NOS
TCGA-AC-A23C	Infiltrating duct carcinoma, NOS	not reported	MX	not reported	T2	Stage IIB	Breast, NOS	No	no	8500/3	C50.9	released	No	not reported	7bf3a6b2-a2c8-5606-94bb-ead09cf6629b	Breast, NOS	585	NA	stage iib	2010	22751	2019-08-08T16:22:33.988811-05:00	NA	not reported	7th	N1	0	NA	NA	NA	NA	Not Reported	NA	456a904b-34a9-50b2-9081-f15c14ce4368	NA	NA	62	-22751	1948	NA	101066d0-ba7f-5fd9-b7ae-c7bb0febaa13	Alive	not reported	female	white	NA	NA	NA	Radiation Therapy, NOS
TCGA-AC-A23E	Infiltrating duct carcinoma, NOS	not reported	MX	not reported	T2	Stage IIB	Breast, NOS	No	no	8500/3	C50.9	released	No	not reported	7ab0a7f6-3e16-5470-9f55-fcdda07a39d4	Breast, NOS	698	NA	stage iib	2010	18500	2019-08-08T16:22:33.988811-05:00	NA	not reported	7th	N1	0	NA	NA	NA	NA	Not Reported	NA	89e34a55-3b41-5a55-b1d1-ae3a23ef3137	NA	NA	50	-18500	1960	NA	658c344d-b664-555b-813e-666906a220a8	Alive	not reported	female	white	NA	NA	NA	Radiation Therapy, NOS
TCGA-AC-A23G	Lobular carcinoma, NOS	not reported	MX	not reported	T1c	Stage IIA	Breast, NOS	No	no	8520/3	C50.9	released	No	not reported	7b6e1148-2104-564f-bdd6-3b01a758fa17	Breast, NOS	2248	NA	stage iia	2006	27934	2019-08-08T16:22:33.988811-05:00	NA	not reported	6th	N1	0	NA	NA	NA	NA	Not Reported	NA	f1cf3275-c0f8-53f7-b33e-750b22936cfa	NA	NA	76	-27934	1930	NA	b45b3b11-2ab6-5f22-ba64-8c008fc3c401	Alive	not reported	female	white	NA	NA	NA	Radiation Therapy, NOS
TCGA-AC-A23H	Infiltrating duct carcinoma, NOS	not reported	M0	not reported	T2	Stage IIA	Breast, NOS	No	no	8500/3	C50.9	released	No	not reported	36b29ff0-2019-5346-b65d-c425ebdb09e5	Breast, NOS	0	NA	stage iia	2009	32872	2019-08-08T16:22:33.988811-05:00	NA	not reported	7th	NX	0	NA	NA	NA	NA	Not Reported	NA	250c31ef-1358-5568-b464-b5e052d15f5d	NA	NA	90	-32872	1919	NA	d40005ad-6bb7-5b32-9f2d-2ab2394dd0ba	Dead	not hispanic or latino	female	white	0	NA	NA	Radiation Therapy, NOS
TCGA-AC-A2B8	Lobular carcinoma, NOS	not reported	M0	not reported	T3	Stage IIB	Breast, NOS	No	no	8520/3	C50.9	released	No	not reported	9a63aeae-349b-517b-b41b-8f4f6c348536	Breast, NOS	677	NA	stage iib	2011	31003	2019-08-08T16:22:33.988811-05:00	NA	not reported	7th	N0 (i-)	0	NA	NA	NA	NA	Not Reported	NA	2c151d20-25ba-5513-958b-1afac171cc08	NA	NA	84	-31003	1927	NA	caad7c7a-5964-55fa-ab73-23ed45cf53aa	Alive	not hispanic or latino	female	white	NA	NA	NA	Radiation Therapy, NOS
TCGA-AC-A2BK	Infiltrating duct carcinoma, NOS	not reported	MX	not reported	T2	Stage IIIA	Breast, NOS	No	no	8500/3	C50.9	released	No	not reported	e5fe4a40-36dc-51d2-95a2-ded030dc9711	Breast, NOS	2222	NA	stage iiia	2006	28625	2019-08-08T16:22:33.988811-05:00	NA	not reported	6th	N2a	0	NA	NA	NA	NA	Not Reported	NA	18a3024a-c141-5a1f-88f0-40f9554385a4	NA	NA	78	-28625	1928	NA	7049bb79-f570-5d76-8d81-5a18caf7d004	Alive	not reported	female	black or african american	NA	NA	NA	Radiation Therapy, NOS
TCGA-AC-A2FB	Lobular carcinoma, NOS	not reported	MX	not reported	T2	Stage IIA	Breast, NOS	No	no	8520/3	C50.9	released	No	not reported	5c671ad1-bb95-5934-9a98-e82dad5ee54e	Breast, NOS	1234	NA	stage iia	2009	23851	2019-08-08T16:22:33.988811-05:00	NA	not reported	6th	N0	0	NA	NA	NA	NA	Not Reported	NA	4980ce41-4bd9-5152-9536-bd4ee9565329	NA	NA	65	-23851	1944	NA	24a3ecf3-3ba2-5064-8bd4-34b092e09d06	Alive	not hispanic or latino	female	white	NA	NA	NA	Radiation Therapy, NOS
TCGA-AC-A2FE	Lobular carcinoma, NOS	not reported	MX	not reported	T3	Stage IIIC	Breast, NOS	No	no	8520/3	C50.9	released	No	not reported	daf95e20-1cb7-5e78-9486-48839a969263	Breast, NOS	2240	NA	stage iiic	2005	22746	2019-08-08T16:22:33.988811-05:00	NA	not reported	6th	N3a	0	NA	NA	NA	NA	Not Reported	NA	ff7e5ba4-dbc0-5dda-a50c-f57119e3b0ab	NA	NA	62	-22746	1943	NA	1dc9f695-9b1b-5aba-a0ec-665d6f9f8764	Dead	not hispanic or latino	female	white	2636	NA	NA	Radiation Therapy, NOS
TCGA-AC-A2FF	Lobular carcinoma, NOS	not reported	MX	not reported	T2	Stage IIB	Breast, NOS	No	no	8520/3	C50.9	released	No	not reported	9f4fc7c8-5f6a-5783-94c7-142179bd90f7	Breast, NOS	2759	NA	stage iib	2006	NA	2019-08-08T16:22:33.988811-05:00	NA	not reported	6th	N1	0	NA	NA	NA	NA	Not Reported	NA	f6a84bf5-8912-5f55-882f-86c4593a2bf2	NA	NA	40	NA	1966	NA	e0a31b8b-703d-5307-8b68-250c0899dd51	Alive	not hispanic or latino	female	asian	NA	NA	NA	Radiation Therapy, NOS
TCGA-AC-A2FG	Lobular carcinoma, NOS	not reported	MX	not reported	T2	Stage IIB	Breast, NOS	No	no	8520/3	C50.9	released	No	not reported	1e21017d-7cd5-5890-b94c-f38e792c4a8f	Breast, NOS	1853	NA	stage iib	2007	29211	2019-08-08T16:22:33.988811-05:00	NA	not reported	6th	N1a	0	NA	NA	NA	NA	Not Reported	NA	9a5dcc23-dade-50d5-bb74-5cb24b7266aa	NA	NA	79	-29211	1928	NA	08e1a0e0-a3ed-5c40-babe-18516d3c27d4	Alive	not reported	female	white	NA	NA	NA	Radiation Therapy, NOS
TCGA-AC-A2FM	Lobular carcinoma, NOS	not reported	M0	not reported	T2	Stage IIB	Breast, NOS	No	no	8520/3	C50.9	released	No	not reported	589b6257-1230-5d67-bf2a-7cfe3a00fd05	Breast, NOS	NA	NA	stage iib	2004	31805	2019-08-08T16:22:33.988811-05:00	NA	not reported	6th	N1mi	0	NA	NA	NA	NA	Not Reported	NA	83c958e5-ec89-5257-b469-6320932b474d	NA	NA	87	-31805	1917	2006	78da5fb8-73d6-5966-be41-109fb625bf18	Dead	not hispanic or latino	female	white	792	NA	NA	Radiation Therapy, NOS
TCGA-AC-A2FO	Lobular carcinoma, NOS	not reported	MX	not reported	T2	Stage IIB	Breast, NOS	No	no	8520/3	C50.9	released	No	not reported	80707652-627d-50f8-ba53-81adb45f712e	Breast, NOS	2255	NA	stage iib	2005	23928	2019-08-08T16:22:33.988811-05:00	NA	not reported	6th	N1	0	NA	NA	NA	NA	Not Reported	NA	aaa30581-c9f9-5f67-af95-27412b991066	NA	NA	65	-23928	1940	NA	7a34ea89-1805-584e-8076-78f9b54d2895	Alive	not hispanic or latino	female	white	NA	NA	NA	Radiation Therapy, NOS
TCGA-AC-A2QI	Lobular carcinoma, NOS	not reported	MX	not reported	T3	Stage IIIA	Breast, NOS	No	no	8520/3	C50.9	released	No	not reported	0b952469-20d9-5831-b719-8d55fd60d25b	Breast, NOS	588	NA	stage iiia	2011	27865	2019-08-08T16:22:33.988811-05:00	NA	not reported	7th	N1a	0	NA	NA	NA	NA	Not Reported	NA	2bf1f3b7-8dd4-5b2b-9dd2-b0a14a3fe02f	NA	NA	76	-27865	1935	NA	de88ff20-a93a-572e-9060-34f64f281360	Alive	not hispanic or latino	female	white	NA	NA	NA	Radiation Therapy, NOS
TCGA-AC-A2QJ	Metaplastic carcinoma, NOS	not reported	M0	not reported	T4b	Stage IIIB	Breast, NOS	No	no	8575/3	C50.9	released	No	not reported	64e01752-98b1-5e5c-8214-e0c19d44a660	Breast, NOS	69	NA	stage iiib	2011	17569	2019-08-08T16:22:33.988811-05:00	NA	not reported	7th	N0	0	NA	NA	NA	NA	Not Reported	NA	1e3cebde-4644-5cc8-9cb6-70b65e90d969	NA	NA	48	-17569	1963	NA	8e42272c-55f9-5322-8779-d5adf0237ad9	Dead	hispanic or latino	female	white	446	NA	NA	Radiation Therapy, NOS
TCGA-AC-A3BB	Lobular carcinoma, NOS	not reported	MX	not reported	T3	Stage IIIA	Breast, NOS	No	no	8520/3	C50.9	released	No	not reported	5e58abb6-c6bb-564e-bf51-311f67d6aa08	Breast, NOS	987	NA	stage iiia	2011	16983	2019-08-08T16:22:33.988811-05:00	NA	not reported	7th	N2a	0	NA	NA	NA	NA	Not Reported	NA	15bdf49c-c942-5a0d-ba89-9b27d640214f	NA	NA	46	-16983	1965	NA	72594956-89fa-577e-a69f-73d58971ee28	Alive	not hispanic or latino	female	black or african american	NA	NA	NA	Radiation Therapy, NOS
TCGA-AC-A3EH	Pleomorphic carcinoma	not reported	M0	not reported	T3	Stage IIIC	Breast, NOS	No	no	8022/3	C50.9	released	No	not reported	900a60e5-53a8-564e-b0bf-b2655a5e2b79	Breast, NOS	17	NA	stage iiic	2011	29014	2019-08-08T16:22:33.988811-05:00	NA	not reported	7th	N3	0	NA	NA	NA	NA	Not Reported	NA	c4a48308-09e8-5697-abb6-e4f5dc38ac52	NA	NA	79	-29014	1932	NA	751deccb-02d6-5184-92db-21e9a03df5de	Dead	not hispanic or latino	female	white	197	NA	NA	Radiation Therapy, NOS
TCGA-AC-A3HN	Lobular carcinoma, NOS	not reported	MX	not reported	T2	Stage IIB	Breast, NOS	No	no	8520/3	C50.9	released	No	not reported	bfe897ed-a146-56c4-94d3-8388c5446359	Breast, NOS	496	NA	stage iib	2011	32061	2019-08-08T16:22:33.988811-05:00	NA	not reported	7th	N1a	0	NA	NA	NA	NA	Not Reported	NA	06f9c2aa-7098-5f35-a0e0-f2d6d3a57c69	NA	NA	87	-32061	1924	NA	72d61db7-1a02-5167-a485-11a30f45cb92	Alive	not hispanic or latino	female	white	NA	NA	NA	Radiation Therapy, NOS
TCGA-AC-A3QP	Lobular carcinoma, NOS	not reported	MX	not reported	T2	Stage IIB	Breast, NOS	No	no	8520/3	C50.9	released	No	not reported	85fd387e-9027-5cf8-a5d4-337bc93b683d	Breast, NOS	675	NA	stage iib	2011	29113	2019-08-08T16:22:33.988811-05:00	NA	not reported	7th	N1mi	0	NA	NA	NA	NA	Not Reported	NA	96d81b77-0e39-53a2-8a90-32ab843a70a5	NA	NA	79	-29113	1932	NA	e1227a22-3a13-57a9-a195-370abc42f0ac	Alive	not hispanic or latino	female	white	NA	NA	NA	Radiation Therapy, NOS
TCGA-AC-A3TM	Lobular carcinoma, NOS	not reported	M0	not reported	T3	Stage IIIA	Breast, NOS	No	no	8520/3	C50.9	released	No	not reported	cfb959c1-e75f-5cab-a0ef-21b60d8ea476	Breast, NOS	762	NA	stage iiia	2011	18535	2019-08-08T16:22:33.988811-05:00	NA	not reported	7th	N1mi	0	NA	NA	NA	NA	Not Reported	NA	b6c1a395-e7e2-52b6-bd4a-8897347e40f1	NA	NA	50	-18535	1961	NA	befab931-b448-5116-bfa6-d87041eecd87	Alive	not hispanic or latino	female	white	NA	NA	NA	Radiation Therapy, NOS
TCGA-AC-A3TN	Lobular carcinoma, NOS	not reported	MX	not reported	T3	Stage IIB	Breast, NOS	No	no	8520/3	C50.9	released	No	not reported	3af31ac3-db44-5d4b-93ad-5d056dba549e	Breast, NOS	456	NA	stage iib	2012	27421	2019-08-08T16:22:33.988811-05:00	NA	not reported	7th	N0	0	NA	NA	NA	NA	Not Reported	NA	da12b35b-45f6-5cc0-a074-ad10b0497d25	NA	NA	75	-27421	1937	NA	6545e244-a52e-5ee2-bc23-76f6b9992c8a	Alive	not hispanic or latino	female	white	NA	NA	NA	Radiation Therapy, NOS
TCGA-AC-A3W5	Lobular carcinoma, NOS	not reported	MX	not reported	T2	Stage IIA	Breast, NOS	No	yes	8520/3	C50.9	released	Not Reported	not reported	6575210b-1758-58dd-9ed5-186215b07886	Breast, NOS	504	NA	stage iia	2011	24029	2019-08-08T16:22:33.988811-05:00	NA	not reported	7th	N0	0	NA	NA	NA	NA	Not Reported	NA	22a869c7-1975-5bd3-a953-23e8dd4ba040	NA	NA	65	-24029	1946	NA	d610c635-9db9-5675-9512-3a3a62c5cfa8	Alive	not hispanic or latino	female	black or african american	NA	NA	NA	Radiation Therapy, NOS
TCGA-AC-A3W6	Lobular carcinoma, NOS	not reported	MX	not reported	T3	Stage IIIA	Breast, NOS	No	yes	8520/3	C50.9	released	Not Reported	not reported	1f7ab1c9-21b3-54b1-b946-f49d46677135	Breast, NOS	0	NA	stage iiia	2012	32872	2019-08-08T16:22:33.988811-05:00	NA	not reported	7th	N1	0	NA	NA	NA	NA	Not Reported	NA	62d59766-8f0b-59b2-924a-26f55e923431	NA	NA	90	-32872	1922	NA	8ff31ac4-cc48-5ce9-ae05-eea1586a7a2f	Alive	not hispanic or latino	female	white	NA	NA	NA	Radiation Therapy, NOS
TCGA-AC-A3W7	Lobular carcinoma, NOS	not reported	MX	not reported	T2	Stage IIB	Breast, NOS	No	no	8520/3	C50.9	released	No	not reported	3fae4489-be29-5914-a41f-f2b1ff4f6c7c	Breast, NOS	471	NA	stage iib	2012	24327	2019-08-08T16:22:33.988811-05:00	NA	not reported	7th	N1a	0	NA	NA	NA	NA	Not Reported	NA	678390a6-61dc-5fdf-82f0-007ec4de91e1	NA	NA	66	-24327	1946	NA	64f6186f-e283-5fd7-9cc9-aa0344d36e87	Alive	not hispanic or latino	female	white	NA	NA	NA	Radiation Therapy, NOS
TCGA-AC-A3YJ	Papillary carcinoma, NOS	not reported	MX	not reported	T2	Stage IIA	Breast, NOS	No	no	8050/3	C50.9	released	No	not reported	dba00b32-0c8c-5077-8c6e-61d794b0f15c	Breast, NOS	754	NA	stage iia	2012	24439	2019-08-08T16:22:33.988811-05:00	NA	not reported	7th	N0 (i-)	0	NA	NA	NA	NA	Not Reported	NA	f54497b9-cd22-5fe0-8f13-cd87eb208f31	NA	NA	66	-24439	1946	NA	af206732-0f38-592d-b5bb-eed2ff2ed635	Alive	not hispanic or latino	female	white	NA	NA	NA	Radiation Therapy, NOS
TCGA-AC-A4ZE	Lobular carcinoma, NOS	not reported	M0	not reported	T3	Stage IIB	Breast, NOS	No	no	8520/3	C50.9	released	No	not reported	20cd5425-e669-5dff-80eb-b7065c5ca2fe	Breast, NOS	890	NA	stage iib	2012	23284	2019-08-08T16:22:33.988811-05:00	NA	not reported	7th	N0	0	NA	NA	NA	NA	Not Reported	NA	22f4ac8a-b4d2-50f7-bc25-e46c8b08e89b	NA	NA	63	-23284	1949	NA	e8ea4f90-5bb5-5796-a342-8188bde8002b	Alive	not hispanic or latino	female	white	NA	NA	NA	Radiation Therapy, NOS
TCGA-AC-A5EH	Infiltrating duct carcinoma, NOS	not reported	MX	not reported	T2	Stage IIB	Breast, NOS	No	no	8500/3	C50.9	released	No	not reported	1ce814be-ebaf-53ba-97ee-ed5208f9a8d9	Breast, NOS	511	NA	stage iib	2012	27964	2019-08-08T16:22:33.988811-05:00	NA	not reported	7th	N1mi	0	NA	NA	NA	NA	Not Reported	NA	dafa820a-3d55-5463-9de6-070e1aab41d3	NA	NA	76	-27964	1936	NA	a72214e9-a11b-54ef-8bd0-2bfa5d091ae9	Alive	not hispanic or latino	female	black or african american	NA	NA	NA	Radiation Therapy, NOS
TCGA-AC-A5XS	Lobular carcinoma, NOS	not reported	MX	not reported	T2	Stage IIA	Breast, NOS	No	yes	8520/3	C50.9	released	Not Reported	not reported	a5365717-07f9-55d7-a1e0-62f5d7fd4d14	Breast, NOS	588	NA	stage iia	2012	27160	2019-08-08T16:22:33.988811-05:00	NA	not reported	7th	N0	0	NA	NA	NA	NA	Not Reported	NA	1477373a-6ab5-5961-8f67-46e8a46036fc	NA	NA	74	-27160	1938	NA	d5ec6bed-446e-5a69-9f2f-da0266805b72	Alive	not hispanic or latino	female	white	NA	NA	NA	Radiation Therapy, NOS
TCGA-AC-A5XU	Infiltrating duct carcinoma, NOS	not reported	MX	not reported	T3	Stage IIB	Breast, NOS	No	no	8500/3	C50.9	released	No	not reported	797fb1b5-1719-541d-8561-39117706e1b7	Breast, NOS	455	NA	stage iib	2013	27191	2019-08-08T16:22:33.988811-05:00	NA	not reported	7th	N0 (i-)	0	NA	NA	NA	NA	Not Reported	NA	aac6ab72-ec18-5d86-90da-30e187fc5687	NA	NA	74	-27191	1939	NA	a5181749-71b5-5600-9ea6-9d019fede17a	Alive	not hispanic or latino	female	black or african american	NA	NA	NA	Radiation Therapy, NOS
TCGA-AC-A62X	Infiltrating duct carcinoma, NOS	not reported	MX	not reported	T2	Stage IIA	Breast, NOS	No	yes	8500/3	C50.9	released	Not Reported	not reported	1ef67b21-9228-56c1-b7c9-9327fa038490	Breast, NOS	417	NA	stage iia	2013	26627	2019-08-08T16:22:33.988811-05:00	NA	not reported	7th	N0	0	NA	NA	NA	NA	Not Reported	NA	df844da9-d674-5ddc-9e46-73fed54b2327	NA	NA	72	-26627	1941	NA	71332371-ae18-5170-bb99-6a1cb598039e	Alive	not hispanic or latino	female	black or african american	NA	NA	NA	Radiation Therapy, NOS
TCGA-AC-A62Y	Lobular carcinoma, NOS	not reported	MX	not reported	T2	Stage IIB	Breast, NOS	No	no	8520/3	C50.9	released	No	not reported	8670e69e-aa01-5399-9813-4b3838b82b07	Breast, NOS	530	NA	stage iib	2012	28876	2019-08-08T16:22:33.988811-05:00	NA	not reported	7th	N1	0	NA	NA	NA	NA	Not Reported	NA	b3346d0e-5ef5-5d22-ae05-2f2326d88361	NA	NA	79	-28876	1933	NA	ce239b47-87e0-5471-a71a-a1da884520ac	Alive	not hispanic or latino	female	white	NA	NA	NA	Radiation Therapy, NOS
TCGA-AC-A6IV	Infiltrating lobular mixed with other types of carcinoma	not reported	MX	not reported	T2	Stage IIB	Breast, NOS	No	no	8524/3	C50.9	released	No	not reported	b243a11e-1517-54aa-bd6c-aa360675ee51	Breast, NOS	568	NA	stage iib	2012	17521	2019-08-08T16:22:33.988811-05:00	NA	not reported	7th	N1	0	NA	NA	NA	NA	Not Reported	NA	d30e7281-b574-5851-bc26-778a213e2a43	NA	NA	47	-17521	1965	NA	6f19f9aa-a732-5606-96f8-9a3ec3a2f734	Alive	not hispanic or latino	female	white	NA	NA	NA	Radiation Therapy, NOS
TCGA-AC-A6IW	Infiltrating duct carcinoma, NOS	not reported	MX	not reported	T2	Stage IIA	Breast, NOS	No	no	8500/3	C50.9	released	No	not reported	bce629a0-9579-53fc-ad64-43cacdd32cf3	Breast, NOS	413	NA	stage iia	2013	26896	2019-08-08T16:22:33.988811-05:00	NA	not reported	7th	N0 (i-)	0	NA	NA	NA	NA	Not Reported	NA	d5a5a092-696a-5f79-818b-e3cccf779c40	NA	NA	73	-26896	1940	NA	d1a0b962-e28d-596e-9e0f-514f85c7f551	Alive	not hispanic or latino	female	black or african american	NA	NA	NA	Radiation Therapy, NOS
TCGA-AC-A6NO	Infiltrating duct carcinoma, NOS	not reported	MX	not reported	T2	Stage IIB	Breast, NOS	No	no	8500/3	C50.9	released	No	not reported	3be281bc-4d58-5af3-8cdb-435a5d928408	Breast, NOS	51	NA	stage iib	2011	15996	2019-08-08T16:22:33.988811-05:00	NA	not reported	7th	N1a	0	NA	NA	NA	NA	Not Reported	NA	16a03aba-267c-5142-823e-bbda50652682	NA	NA	43	-15996	1968	NA	137de904-6e9f-53e5-bc02-c6c2e10e600f	Alive	not hispanic or latino	female	black or african american	NA	NA	NA	Radiation Therapy, NOS
TCGA-AC-A7VB	Infiltrating duct carcinoma, NOS	not reported	MX	not reported	T1c	Stage IIA	Breast, NOS	No	no	8500/3	C50.9	released	No	not reported	991ac3c6-11c5-5d90-89dd-61d23be0653c	Breast, NOS	250	NA	stage iia	2013	18806	2019-08-08T16:22:33.988811-05:00	NA	not reported	7th	N1a	0	NA	NA	NA	NA	Not Reported	NA	3f6e9641-b05d-5bad-ba25-16941fd7dcef	NA	NA	51	-18806	1962	NA	58aeff51-572d-56b9-a0c0-ddf2368b4eda	Alive	not hispanic or latino	female	black or african american	NA	NA	NA	Radiation Therapy, NOS
TCGA-AC-A7VC	Metaplastic carcinoma, NOS	not reported	MX	not reported	T3	Stage IIB	Breast, NOS	No	no	8575/3	C50.9	released	No	not reported	17834a6c-47a1-54d5-b23f-fae923273971	Breast, NOS	1	NA	stage iib	2013	20479	2019-08-08T16:22:33.988811-05:00	NA	not reported	7th	N0	0	NA	NA	NA	NA	Not Reported	NA	700adb18-a541-5613-a4ee-141729f7aaf5	NA	NA	56	-20479	1957	NA	d742ddd8-bc53-553a-bb30-88f92b217eb5	Alive	not hispanic or latino	female	white	NA	NA	NA	Radiation Therapy, NOS
TCGA-AC-A8OP	Infiltrating duct carcinoma, NOS	not reported	MX	not reported	T1c	Stage IA	Breast, NOS	No	no	8500/3	C50.9	released	No	not reported	7cfc3db9-9892-5ba9-b0d5-0394b929a821	Breast, NOS	614	NA	stage ia	2011	26550	2019-08-08T16:22:33.988811-05:00	NA	not reported	7th	N0 (i-)	0	NA	NA	NA	NA	Not Reported	NA	8829454d-9ece-5771-a5d7-7acf2b677633	NA	NA	72	-26550	1939	NA	e93f6e03-699d-51ff-8963-110526f66a91	Alive	not hispanic or latino	female	black or african american	NA	NA	NA	Radiation Therapy, NOS
TCGA-AC-A8OQ	Infiltrating duct carcinoma, NOS	not reported	MX	not reported	T2	Stage IIB	Breast, NOS	No	no	8500/3	C50.9	released	No	not reported	0df22b89-d612-5f71-88d4-bd24c6ef1f7b	Breast, NOS	34	NA	stage iib	2011	26535	2019-08-08T16:22:33.988811-05:00	NA	not reported	7th	N1a	0	NA	NA	NA	NA	Not Reported	NA	27cec89c-ce7f-556d-bb71-414e86cf0940	NA	NA	72	-26535	1939	NA	f7898136-39d2-58de-aaa9-01027eaa5d8f	Alive	not hispanic or latino	female	black or african american	NA	NA	NA	Radiation Therapy, NOS
TCGA-AC-A8OR	Mucinous adenocarcinoma	not reported	MX	not reported	T1c	Stage IA	Breast, NOS	No	no	8480/3	C50.9	released	No	not reported	9ccf79cf-ca7b-57ed-9599-b75441789f96	Breast, NOS	40	NA	stage ia	2013	27605	2019-08-08T16:22:33.988811-05:00	NA	not reported	7th	N0 (i-)	0	NA	NA	NA	NA	Not Reported	NA	d7fec022-d2f6-5bb8-9742-8a0b0788f8cd	NA	NA	75	-27605	1938	NA	cf373a2c-aa7a-5bf6-a623-0d4ea14bf011	Alive	not hispanic or latino	female	white	NA	NA	NA	Radiation Therapy, NOS
TCGA-AC-A8OS	Lobular carcinoma, NOS	not reported	MX	not reported	T2	Stage IIA	Breast, NOS	No	no	8520/3	C50.9	released	No	not reported	a3ac3ea4-45f0-5d08-8cd4-be1f0df03eda	Breast, NOS	70	NA	stage iia	2013	26248	2019-08-08T16:22:33.988811-05:00	NA	not reported	7th	N0 (i-)	0	NA	NA	NA	NA	Not Reported	NA	9a1d8703-84ae-50c0-a69a-8edb32f66963	NA	NA	71	-26248	1942	NA	9b0df3d7-04cd-519c-be15-7506a22648e5	Alive	not hispanic or latino	female	white	NA	NA	NA	Radiation Therapy, NOS
TCGA-AN-A0XL	Infiltrating duct carcinoma, NOS	not reported	M0	not reported	T2	Stage IIA	Breast, NOS	No	no	8500/3	C50.9	released	No	not reported	2e9ad0a6-778a-53a5-a055-d5bec04d3e1e	Breast, NOS	163	NA	stage iia	2010	22341	2019-08-08T16:23:06.992266-05:00	NA	not reported	7th	N0	0	NA	NA	NA	NA	Not Reported	NA	e6c3800f-92cd-5377-ae29-53509a5e195f	NA	NA	61	-22341	1949	NA	40925442-5667-55a3-8d74-338a5c1c0de8	Alive	not hispanic or latino	female	white	NA	NA	NA	Radiation Therapy, NOS
TCGA-AN-A0XN	Infiltrating duct carcinoma, NOS	not reported	M0	not reported	T2	Stage IIIA	Breast, NOS	No	no	8500/3	C50.9	released	No	not reported	a79e76fd-e867-5521-97f9-7118cab59dea	Breast, NOS	10	NA	stage iiia	2010	25029	2019-08-08T16:23:06.992266-05:00	NA	not reported	7th	N2	0	NA	NA	NA	NA	Not Reported	NA	6dd50add-feeb-5427-90e3-fce062e96157	NA	NA	68	-25029	1942	NA	6e25283b-1106-572f-9edf-98f86b55c01b	Alive	not hispanic or latino	female	white	NA	NA	NA	Radiation Therapy, NOS
TCGA-AN-A0XO	Infiltrating duct carcinoma, NOS	not reported	M0	not reported	T2	Stage IIIA	Breast, NOS	No	no	8500/3	C50.9	released	No	not reported	e2f11c94-39b9-597e-9cbb-0df76724e022	Breast, NOS	375	NA	stage iiia	2010	21640	2019-08-08T16:23:06.992266-05:00	NA	not reported	7th	N2	0	NA	NA	NA	NA	Not Reported	NA	2e6eb51a-eaac-5a80-b0df-3d6c91c26fba	NA	NA	59	-21640	1951	NA	f383a786-4638-529e-aa99-ddc65efe9ccf	Alive	not hispanic or latino	female	white	NA	NA	NA	Radiation Therapy, NOS
TCGA-AN-A0XP	Infiltrating duct carcinoma, NOS	not reported	M0	not reported	T2	Stage IIIA	Breast, NOS	No	no	8500/3	C50.9	released	No	not reported	89df6618-1c06-5cdb-be95-330c88574622	Breast, NOS	9	NA	stage iiia	2010	25305	2019-08-08T16:23:06.992266-05:00	NA	not reported	7th	N2	0	NA	NA	NA	NA	Not Reported	NA	94f2c25f-b734-54f0-9e09-14dee4715a21	NA	NA	69	-25305	1941	NA	f15cd3f2-daa6-538b-8bd2-c820706176cc	Alive	not hispanic or latino	female	white	NA	NA	NA	Radiation Therapy, NOS
TCGA-AN-A0XR	Infiltrating duct carcinoma, NOS	not reported	M0	not reported	T2	Stage IIIA	Breast, NOS	No	no	8500/3	C50.9	released	No	not reported	2a80bad2-7b01-59c9-b236-ac7d6c7bc905	Breast, NOS	10	NA	stage iiia	2010	20381	2019-08-08T16:23:06.992266-05:00	NA	not reported	7th	N2	0	NA	NA	NA	NA	Not Reported	NA	c53f0ec7-1d5e-5905-b527-c1d42235b24b	NA	NA	55	-20381	1955	NA	68da555d-beec-5a46-b982-7e27240cfd1b	Alive	not hispanic or latino	female	white	NA	NA	NA	Radiation Therapy, NOS
TCGA-AN-A0XS	Infiltrating duct carcinoma, NOS	not reported	M0	not reported	T2	Stage IIIA	Breast, NOS	No	no	8500/3	C50.9	released	No	not reported	9f1a06e6-5877-54ea-9abe-d8472f16dece	Breast, NOS	10	NA	stage iiia	2010	23358	2019-08-08T16:23:06.992266-05:00	NA	not reported	7th	N2	0	NA	NA	NA	NA	Not Reported	NA	31c4feff-8356-5dcd-baae-37cd334ebf69	NA	NA	63	-23358	1947	NA	6ef79323-8c2b-5353-ae3b-aa36c95436dc	Alive	not hispanic or latino	female	white	NA	NA	NA	Radiation Therapy, NOS
TCGA-AN-A0XT	Infiltrating duct carcinoma, NOS	not reported	M0	not reported	T2	Stage IIIA	Breast, NOS	No	no	8500/3	C50.9	released	No	not reported	5b46ca18-443d-5f42-942c-29d6e16aa17b	Breast, NOS	10	NA	stage iiia	2010	19794	2019-08-08T16:23:06.992266-05:00	NA	not reported	7th	N2	0	NA	NA	NA	NA	Not Reported	NA	f72e162f-4685-5778-b247-48ebd4f042f3	NA	NA	54	-19794	1956	NA	b33beaea-4bdb-5c59-bc8b-17dd8acbed31	Alive	not hispanic or latino	female	white	NA	NA	NA	Radiation Therapy, NOS
TCGA-AN-A0XU	Infiltrating duct carcinoma, NOS	not reported	M0	not reported	T2	Stage IIA	Breast, NOS	No	no	8500/3	C50.9	released	No	not reported	274cf91f-ccfe-5323-a570-791c1f67a9a3	Breast, NOS	10	NA	stage iia	2010	20052	2019-08-08T16:23:06.992266-05:00	NA	not reported	7th	N0	0	NA	NA	NA	NA	Not Reported	NA	9e5f994a-5c8b-5df9-9c45-5cb54cc813ac	NA	NA	54	-20052	1956	NA	b1060ab2-7333-5640-b393-4e2fe7ff6108	Alive	not hispanic or latino	female	white	NA	NA	NA	Radiation Therapy, NOS
TCGA-AN-A0XV	Infiltrating duct carcinoma, NOS	not reported	M0	not reported	T2	Stage IIIA	Breast, NOS	No	no	8500/3	C50.9	released	No	not reported	a617cedc-a5c8-5c70-82a2-8a88bb6f0544	Breast, NOS	162	NA	stage iiia	2010	24779	2019-08-08T16:23:06.992266-05:00	NA	not reported	7th	N2	0	NA	NA	NA	NA	Not Reported	NA	f4e32fc2-8f8f-5a8f-89a9-df19bf6ac4e7	NA	NA	67	-24779	1943	NA	6b881573-61c6-5713-b409-6aac687d9b9b	Alive	not hispanic or latino	female	white	NA	NA	NA	Radiation Therapy, NOS
TCGA-AN-A0XW	Infiltrating duct carcinoma, NOS	not reported	M0	not reported	T2	Stage IIIA	Breast, NOS	No	no	8500/3	C50.9	released	No	not reported	261e3ffe-c9cb-5ba6-8f04-44327bee9f60	Breast, NOS	170	NA	stage iiia	2010	13208	2019-08-08T16:23:06.992266-05:00	NA	not reported	7th	N2	0	NA	NA	NA	NA	Not Reported	NA	62b48d14-a992-5d6e-9910-ce31634ea579	NA	NA	36	-13208	1974	NA	aa13d18a-c2bd-5600-b435-3823c172645e	Alive	not hispanic or latino	female	white	NA	NA	NA	Radiation Therapy, NOS
TCGA-AO-A03L	Infiltrating duct carcinoma, NOS	not reported	M0	not reported	T3	Stage IIIA	Breast, NOS	No	no	8500/3	C50.9	released	No	not reported	1cc3db14-c9f6-5a41-a0f3-56216749e7af	Breast, NOS	2442	NA	stage iiia	2003	12443	2019-08-08T16:23:06.992266-05:00	NA	not reported	6th	N2	0	NA	NA	NA	NA	Not Reported	NA	425d82ab-2d0b-5fed-ad69-fd81f407e326	NA	NA	34	-12443	1969	NA	804c9b7e-9e8e-5e70-802f-938e2292022d	Alive	not hispanic or latino	female	asian	NA	NA	NA	Radiation Therapy, NOS
TCGA-AO-A03M	Infiltrating duct carcinoma, NOS	not reported	M0	not reported	T1c	Stage I	Breast, NOS	No	no	8500/3	C50.9	released	No	not reported	abb2d8f1-3417-5e52-ae67-935313b09215	Breast, NOS	1866	NA	stage i	2006	10616	2019-08-08T16:23:06.992266-05:00	NA	not reported	6th	N0 (i-)	0	NA	NA	NA	NA	Not Reported	NA	1936fa75-039b-57e7-a948-a5f725a96a86	NA	NA	29	-10616	1977	NA	4cf90822-4e90-57ea-942f-e2264bd4b9f8	Alive	not hispanic or latino	female	white	NA	NA	NA	Radiation Therapy, NOS
TCGA-AO-A03N	Infiltrating duct carcinoma, NOS	not reported	M0	not reported	T2	Stage IIB	Breast, NOS	No	no	8500/3	C50.9	released	No	not reported	32d8ece5-35e8-572b-84bf-b2559a77a3cf	Breast, NOS	2031	NA	stage iib	2006	21816	2019-08-08T16:23:06.992266-05:00	NA	not reported	6th	N1a	0	NA	NA	NA	NA	Not Reported	NA	852184a8-106b-5f7e-be37-5db69cfd1e26	NA	NA	59	-21816	1947	NA	6cf1c428-599b-5184-950b-daf0810fa4ba	Alive	not hispanic or latino	female	white	NA	NA	NA	Radiation Therapy, NOS
TCGA-AO-A0JA	Infiltrating duct carcinoma, NOS	not reported	M0	not reported	T2	Stage IIIC	Breast, NOS	No	no	8500/3	C50.9	released	No	not reported	3d746a7a-4977-5116-872e-8442f4b622bd	Breast, NOS	655	NA	stage iiic	2009	13307	2019-08-08T16:23:34.429413-05:00	NA	not reported	NA	N3	0	NA	NA	NA	NA	Not Reported	NA	b0f9fd0d-26bf-5e18-9d1e-71a52f5ec545	NA	NA	36	-13307	1973	NA	00fd72b0-9e9f-54cb-a0fb-936a146ef152	Alive	not hispanic or latino	female	black or african american	NA	NA	NA	Radiation Therapy, NOS
TCGA-AO-A0JC	Infiltrating duct carcinoma, NOS	not reported	M0	not reported	T2	Stage IIA	Breast, NOS	No	no	8500/3	C50.9	released	No	not reported	359a7719-caa5-5bd5-8e3c-debfff0bc934	Breast, NOS	1547	NA	stage iia	2006	23404	2019-08-08T16:23:34.429413-05:00	NA	not reported	NA	N0 (i-)	0	NA	NA	NA	NA	Not Reported	NA	0c1edfb3-7c12-5d8f-9eb5-efe3b16d4321	NA	NA	64	-23404	1942	NA	0357d081-428b-5792-b884-0b580d598f74	Alive	not hispanic or latino	female	white	NA	NA	NA	Radiation Therapy, NOS
TCGA-AO-A0JD	Infiltrating duct carcinoma, NOS	not reported	M0	not reported	T3	Stage IIIA	Breast, NOS	No	no	8500/3	C50.9	released	No	not reported	afcec2c8-2cad-5f3e-82bd-285f84e24f6f	Breast, NOS	2190	NA	stage iiia	2005	21831	2019-08-08T16:23:34.429413-05:00	NA	not reported	NA	N1a	0	NA	NA	NA	NA	Not Reported	NA	89e4f7fb-de72-5231-b415-be080039e56f	NA	NA	59	-21831	1946	NA	693f11f4-928d-55dd-8bb0-d9c8a042f500	Alive	not hispanic or latino	female	white	NA	NA	NA	Radiation Therapy, NOS
TCGA-AO-A0JE	Infiltrating duct carcinoma, NOS	not reported	M0	not reported	T2	Stage IIIA	Breast, NOS	No	no	8500/3	C50.9	released	No	not reported	e97f47dc-a380-563a-952c-10b0f4511f7b	Breast, NOS	2335	NA	stage iiia	2005	19516	2019-08-08T16:23:34.429413-05:00	NA	not reported	NA	N2a	0	NA	NA	NA	NA	Not Reported	NA	96a34a77-a5f3-5dc9-9334-55bbee0c5f9b	NA	NA	53	-19516	1952	NA	4e5e5012-defc-5d4f-8efd-913fcda41544	Alive	not hispanic or latino	female	black or african american	NA	NA	NA	Radiation Therapy, NOS
TCGA-AO-A0JF	Infiltrating duct carcinoma, NOS	not reported	M0	not reported	T1c	Stage IIA	Breast, NOS	No	no	8500/3	C50.9	released	No	not reported	73acaf20-67f8-5b87-adfd-c2541211b848	Breast, NOS	1980	NA	stage iia	2009	24923	2019-08-08T16:23:34.429413-05:00	NA	not reported	NA	N1a	0	NA	NA	NA	NA	Not Reported	NA	71e9dcaf-8228-5d8c-9bed-a8f8eb7687bd	NA	NA	68	-24923	1941	NA	e4804bd9-90da-5822-a468-18cb1f871174	Alive	not hispanic or latino	female	white	NA	NA	NA	Radiation Therapy, NOS
TCGA-AO-A0JG	Infiltrating duct mixed with other types of carcinoma	not reported	M0	not reported	T2	Stage IIIA	Breast, NOS	No	no	8523/3	C50.9	released	No	not reported	d1352a4b-7d54-5352-92cf-8b81196b5e66	Breast, NOS	798	NA	stage iiia	2009	18021	2019-08-08T16:23:34.429413-05:00	NA	not reported	NA	N2a	0	NA	NA	NA	NA	Not Reported	NA	025a62c6-a573-5955-9e58-526349e3722f	NA	NA	49	-18021	1960	NA	314fe6d1-ee42-5b92-beb6-8d1688180e3d	Alive	not hispanic or latino	female	white	NA	NA	NA	Radiation Therapy, NOS
TCGA-AO-A0JI	Infiltrating duct carcinoma, NOS	not reported	M0	not reported	T1c	Stage IIA	Breast, NOS	No	no	8500/3	C50.9	released	No	not reported	55f24ee5-2989-5fbc-8c50-80f9b5d82e2b	Breast, NOS	1528	NA	stage iia	2007	20694	2019-08-08T16:23:34.429413-05:00	NA	not reported	NA	N1	0	NA	NA	NA	NA	Not Reported	NA	cec3e881-63f0-50a8-948a-e36174f47ba9	NA	NA	56	-20694	1951	NA	b8e6ef3b-70dd-51a2-b782-e70bcedeed95	Alive	not hispanic or latino	female	white	NA	NA	NA	Radiation Therapy, NOS
TCGA-AO-A0JJ	Lobular carcinoma, NOS	not reported	M0	not reported	T2	Stage IIB	Breast, NOS	No	no	8520/3	C50.9	released	No	not reported	37741dc0-0109-5818-8dc3-bdd581c2f866	Breast, NOS	1887	NA	stage iib	2006	19758	2019-08-08T16:23:34.429413-05:00	NA	not reported	NA	N1a	0	NA	NA	NA	NA	Not Reported	NA	b2f7c7a7-8614-598c-a34b-6e42f68b7811	NA	NA	54	-19758	1952	NA	b91af275-dda1-55f0-b973-73bf41c402ce	Alive	not hispanic or latino	female	white	NA	NA	NA	Radiation Therapy, NOS
TCGA-AO-A0JL	Infiltrating duct carcinoma, NOS	not reported	M0	not reported	T2	Stage IIIA	Breast, NOS	No	no	8500/3	C50.9	released	No	not reported	bec3ac72-abaa-5bda-ba4d-458fd2d99075	Breast, NOS	1683	NA	stage iiia	2006	21895	2019-08-08T16:23:34.429413-05:00	NA	not reported	NA	N2a	0	NA	NA	NA	NA	Not Reported	NA	ed6e89e7-d2e3-5245-b11e-9cb9677b0152	NA	NA	59	-21895	1947	NA	0343eabf-0fe4-5c24-b505-0c0635ee9b79	Alive	not hispanic or latino	female	white	NA	NA	NA	Radiation Therapy, NOS
TCGA-AO-A0JM	Infiltrating duct carcinoma, NOS	not reported	M0	not reported	T2	Stage IIB	Breast, NOS	No	no	8500/3	C50.9	released	No	not reported	ffeac965-8a89-507e-a252-5f28cf606cd1	Breast, NOS	2184	NA	stage iib	2005	14653	2019-08-08T16:23:34.429413-05:00	NA	not reported	NA	N1	0	NA	NA	NA	NA	Not Reported	NA	db4f6786-c685-5f25-8ea9-7e55d93fe7ba	NA	NA	40	-14653	1965	NA	0b8808f4-3200-51f6-84b8-8baf22ea047f	Alive	hispanic or latino	female	not reported	NA	NA	NA	Radiation Therapy, NOS
TCGA-AO-A124	Infiltrating duct mixed with other types of carcinoma	not reported	M0	not reported	T2	Stage IIA	Breast, NOS	No	no	8523/3	C50.9	released	No	not reported	e84ee4b7-ae47-5488-8831-946c64ebf44f	Breast, NOS	3506	NA	stage iia	2002	14174	2019-08-08T16:23:34.429413-05:00	NA	not reported	5th	N0 (i-)	0	NA	NA	NA	NA	Not Reported	NA	ec853748-ef86-5691-86cc-24b4d16041d6	NA	NA	38	-14174	1964	NA	09146466-8840-5466-bfba-203aeae34003	Alive	not hispanic or latino	female	white	NA	NA	NA	Radiation Therapy, NOS
TCGA-AO-A125	Papillary carcinoma, NOS	not reported	M0	not reported	T2	Stage IIA	Breast, NOS	No	no	8050/3	C50.9	released	No	not reported	180a1601-357c-55a5-95cf-ee18ad756e63	Breast, NOS	3456	NA	stage iia	2002	26466	2019-08-08T16:23:34.429413-05:00	NA	not reported	5th	N0 (i-)	0	NA	NA	NA	NA	Not Reported	NA	9ebe42aa-9f2e-54bc-a546-aace3e1248e3	NA	NA	72	-26466	1930	NA	35761f10-d90f-56ea-b298-32fd05524e39	Alive	not hispanic or latino	female	black or african american	NA	NA	NA	Radiation Therapy, NOS
TCGA-AO-A126	Infiltrating duct carcinoma, NOS	not reported	M0	not reported	T2	Stage IIA	Breast, NOS	No	no	8500/3	C50.9	released	No	not reported	343d2a69-3f75-5f9a-a755-a67aea0424c2	Breast, NOS	3307	NA	stage iia	2002	14264	2019-08-08T16:23:34.429413-05:00	NA	not reported	NA	N0 (i-)	0	NA	NA	NA	NA	Not Reported	NA	bc83461d-ab77-5fd9-8e8d-e4d3c4a93086	NA	NA	39	-14264	1963	NA	7b747012-f444-5448-8a5e-60eeea16d556	Alive	not hispanic or latino	female	asian	NA	NA	NA	Radiation Therapy, NOS
TCGA-AO-A128	Infiltrating duct carcinoma, NOS	not reported	M0	not reported	T2	Stage IIA	Breast, NOS	No	no	8500/3	C50.9	released	No	not reported	e662f8ff-0f85-5d87-a632-0856c8cead1c	Breast, NOS	3248	NA	stage iia	2002	22340	2019-08-08T16:23:34.429413-05:00	NA	not reported	NA	N0 (i-)	0	NA	NA	NA	NA	Not Reported	NA	804e4552-cfb4-56bc-a3ca-3b2ced6140b9	NA	NA	61	-22340	1941	NA	c2b3e34b-be8a-56d0-9e64-d0e454a8195f	Alive	not hispanic or latino	female	white	NA	NA	NA	Radiation Therapy, NOS
TCGA-AO-A129	Infiltrating duct carcinoma, NOS	not reported	M0	not reported	T2	Stage IIB	Breast, NOS	No	no	8500/3	C50.9	released	No	not reported	5507f971-9412-5c65-9b09-29ca03b168b2	Breast, NOS	3286	NA	stage iib	2002	10898	2019-08-08T16:23:34.429413-05:00	NA	not reported	5th	N1a	0	NA	NA	NA	NA	Not Reported	NA	8a261ec7-b4af-55f1-be08-6ce9f63ab746	NA	NA	29	-10898	1973	NA	5eb68907-5062-5c38-9cac-f302dc9e40b6	Alive	not hispanic or latino	female	white	NA	NA	NA	Radiation Therapy, NOS
TCGA-AO-A12B	Infiltrating duct carcinoma, NOS	not reported	M0	not reported	T2	Stage IIA	Breast, NOS	No	no	8500/3	C50.9	released	No	not reported	3c606dbc-5398-5a81-9ed5-675db8b28da3	Breast, NOS	2989	NA	stage iia	2004	23150	2019-08-08T16:23:34.429413-05:00	NA	not reported	6th	N0 (i-)	0	NA	NA	NA	NA	Not Reported	NA	b7c44fae-40ac-53ad-b6c4-71e12d98eb71	NA	NA	63	-23150	1941	NA	1a86b4cb-85b2-587a-b16a-65d18b5ba268	Alive	hispanic or latino	female	white	NA	NA	NA	Radiation Therapy, NOS
TCGA-AO-A12C	Infiltrating duct carcinoma, NOS	not reported	M0	not reported	T2	Stage IIB	Breast, NOS	No	no	8500/3	C50.9	released	No	not reported	452282d0-7ecc-5284-a771-84f2a90c120e	Breast, NOS	2372	NA	stage iib	2005	15469	2019-08-08T16:23:34.429413-05:00	NA	not reported	6th	N1a	0	NA	NA	NA	NA	Not Reported	NA	b8a7bf1c-2cbd-5e3f-843a-fb27b9caed14	NA	NA	42	-15469	1963	NA	30d0057d-fa42-5512-87eb-bb658244b37d	Alive	not hispanic or latino	female	white	NA	NA	NA	Radiation Therapy, NOS
TCGA-AO-A12E	Lobular carcinoma, NOS	not reported	M0	not reported	T3	Stage IIB	Breast, NOS	No	no	8520/3	C50.9	released	No	not reported	98eab45e-40c4-5bb4-afc3-d0e4a9f1ce39	Breast, NOS	2142	NA	stage iib	2005	18721	2019-08-08T16:23:34.429413-05:00	NA	not reported	6th	N0 (i+)	0	NA	NA	NA	NA	Not Reported	NA	6dd71b10-a861-5d65-aa7c-0ce640035bf6	NA	NA	51	-18721	1954	NA	9a834793-dbc2-599d-8cb4-d6ec874f1ec8	Alive	not hispanic or latino	female	white	NA	NA	NA	Radiation Therapy, NOS
TCGA-AO-A12G	Pleomorphic carcinoma	not reported	M0	not reported	T2	Stage IIA	Breast, NOS	No	no	8022/3	C50.9	released	No	not reported	30e85765-0b8a-5b22-9366-4e07b1b10121	Breast, NOS	1639	NA	stage iia	2006	27705	2019-08-08T16:23:34.429413-05:00	NA	not reported	6th	N0 (i+)	0	NA	NA	NA	NA	Not Reported	NA	9bcad4e4-3bce-5a61-a169-d864b7378c3c	NA	NA	75	-27705	1931	NA	6ed791e7-7e2d-5270-a749-99e47e7ddee4	Alive	not hispanic or latino	female	white	NA	NA	NA	Radiation Therapy, NOS
TCGA-AO-A1KP	Infiltrating duct carcinoma, NOS	not reported	M0	not reported	T1	Stage IIA	Breast, NOS	No	no	8500/3	C50.9	released	No	not reported	a558ee2f-3ef8-59c7-b514-70449b44ba41	Breast, NOS	2953	NA	stage iia	2003	28247	2019-08-08T16:23:34.429413-05:00	NA	not reported	6th	N1	0	NA	NA	NA	NA	Not Reported	NA	859063ab-4971-5a0a-a58a-a64b888b4d50	NA	NA	77	-28247	1926	NA	c460b4d8-7722-5917-87ee-1bab852cd875	Alive	not hispanic or latino	female	white	NA	NA	NA	Radiation Therapy, NOS
TCGA-AO-A1KR	Infiltrating duct carcinoma, NOS	not reported	M0	not reported	T2	Stage IIA	Breast, NOS	No	no	8500/3	C50.9	released	No	not reported	7652a21e-8d5c-5ae2-94b3-728047ac4729	Breast, NOS	2513	NA	stage iia	2005	18900	2019-08-08T16:23:34.429413-05:00	NA	not reported	6th	N0	0	NA	NA	NA	NA	Not Reported	NA	464bb9b2-1ebf-510f-8f95-eac7e8750d1a	NA	NA	51	-18900	1954	NA	3f99d96f-5065-5cfa-aba4-2a581b784fb7	Alive	not hispanic or latino	female	white	NA	NA	NA	Radiation Therapy, NOS
TCGA-AO-A1KS	Lobular carcinoma, NOS	not reported	M0	not reported	T2	Stage IIA	Breast, NOS	No	no	8520/3	C50.9	released	No	not reported	7189e483-1907-5abe-a713-29e81cf9ae32	Breast, NOS	350	NA	stage iia	2010	25230	2019-08-08T16:23:34.429413-05:00	NA	not reported	7th	N0 (i-)	0	NA	NA	NA	NA	Not Reported	NA	9543b2f1-c629-530f-a639-720d6eca159f	NA	NA	69	-25230	1941	NA	c803709b-9418-5aac-91ff-670d96050eca	Alive	not hispanic or latino	female	white	NA	NA	NA	Radiation Therapy, NOS
TCGA-AO-A1KT	Infiltrating duct carcinoma, NOS	not reported	M0	not reported	T1	Stage IIA	Breast, NOS	No	not reported	8500/3	C50.9	released	Not Reported	not reported	732940d5-fff2-516d-919a-846e3d6f2e5b	Breast, NOS	541	NA	stage iia	2009	28660	2019-08-08T16:23:34.429413-05:00	NA	not reported	6th	N1	0	NA	NA	NA	NA	Not Reported	NA	42e772b1-ea77-5a62-8d45-125af5e1cdd0	NA	NA	78	-28660	1931	NA	e9ee6db9-952d-54ee-b031-16a8449777f4	Alive	not hispanic or latino	female	white	NA	NA	NA	Radiation Therapy, NOS
TCGA-AQ-A04H	Infiltrating duct carcinoma, NOS	not reported	MX	not reported	T2	Stage IIIA	Breast, NOS	No	no	8500/3	C50.9	released	No	not reported	298c6e72-48e9-5452-bcfe-d7e5de1a854e	Breast, NOS	754	NA	stage iiia	2009	22539	2019-08-08T16:23:34.429413-05:00	NA	not reported	6th	N2a	0	NA	NA	NA	NA	Not Reported	NA	dbc1cfc5-da7e-5091-b304-43014ad9c698	NA	NA	61	-22539	1948	NA	43096a03-c73d-53ae-b806-5de99c61e2b0	Alive	not hispanic or latino	female	white	NA	NA	NA	Radiation Therapy, NOS
TCGA-AQ-A04L	Infiltrating duct carcinoma, NOS	not reported	MX	not reported	T2	Stage IIA	Breast, NOS	No	no	8500/3	C50.9	released	No	not reported	67ef8596-69a5-5052-89db-1c9bfbfc1ac5	Breast, NOS	3957	NA	stage iia	2001	17759	2019-08-08T16:23:34.429413-05:00	NA	not reported	5th	N0 (i-)	0	NA	NA	NA	NA	Not Reported	NA	6345eb97-4ef4-58d2-bd84-44665aedf871	NA	NA	48	-17759	1953	NA	09ef1a30-99da-5b30-b433-522334e5b60f	Alive	not hispanic or latino	female	white	NA	NA	NA	Radiation Therapy, NOS
TCGA-AQ-A0Y5	Infiltrating duct carcinoma, NOS	not reported	MX	not reported	T2	Stage IIIA	Breast, NOS	Yes	yes	8500/3	C50.9	released	Not Reported	not reported	d7f82255-fb83-558c-87ca-5b6e4cb87da4	Breast, NOS	NA	NA	stage iiia	2010	25793	2019-08-08T16:23:34.429413-05:00	NA	not reported	7th	N2a	0	NA	NA	NA	NA	Not Reported	NA	78c6812a-8bd4-54a2-a4ac-29c651bc9e72	NA	NA	70	-25793	1940	2010	5e32b4be-3202-540d-ba66-60892a37917e	Dead	not hispanic or latino	female	white	172	NA	NA	Radiation Therapy, NOS
TCGA-AQ-A1H2	Infiltrating duct carcinoma, NOS	not reported	MX	not reported	T2	Stage IIIA	Breast, NOS	No	no	8500/3	C50.9	released	No	not reported	2c562470-3b66-57cf-a1a7-8509f44c8d8f	Breast, NOS	475	NA	stage iiia	2010	30958	2019-08-08T16:23:34.429413-05:00	NA	not reported	7th	N2a	0	NA	NA	NA	NA	Not Reported	NA	d58294d5-a7c4-5f89-989e-314ab61e62c7	NA	NA	84	-30958	1926	NA	9af3aaf7-8cd1-54e2-9592-cbf2cc65e62b	Alive	not hispanic or latino	female	white	NA	NA	NA	Radiation Therapy, NOS
TCGA-AQ-A1H3	Infiltrating duct carcinoma, NOS	not reported	MX	not reported	T2	Stage IIIC	Breast, NOS	No	no	8500/3	C50.9	released	No	not reported	05208c22-ce72-54d0-891c-a46b511df45d	Breast, NOS	989	NA	stage iiic	2010	18177	2019-08-08T16:23:34.429413-05:00	NA	not reported	7th	N3a	0	NA	NA	NA	NA	Not Reported	NA	8af33c0e-f1fa-5704-8d05-c59e2bae0501	NA	NA	49	-18177	1961	NA	81933452-58fd-5c78-98f5-4eff4587dbe9	Alive	not hispanic or latino	female	white	NA	NA	NA	Radiation Therapy, NOS
TCGA-AQ-A54N	Infiltrating duct carcinoma, NOS	not reported	M0	not reported	T2	Stage IIA	Breast, NOS	No	yes	8500/3	C50.9	released	Not Reported	not reported	7e0aa1f1-c451-52b1-989d-f0ed48fd6cae	Breast, NOS	78	NA	stage iia	2011	18741	2019-08-08T16:23:34.429413-05:00	NA	not reported	7th	N0	0	NA	NA	NA	NA	Not Reported	NA	748dedfb-f874-5d70-a762-bc81d19a4ebc	NA	NA	51	-18741	1960	NA	e113bf07-54c9-534f-bfa1-c600f93f04a0	Alive	hispanic or latino	female	black or african american	NA	NA	NA	Radiation Therapy, NOS
TCGA-AQ-A7U7	Lobular carcinoma, NOS	not reported	M0	not reported	T2	Stage IIIA	Breast, NOS	No	yes	8520/3	C50.9	released	Not Reported	not reported	1c60ad51-6c85-51a8-9c43-2f682474830b	Breast, NOS	304	NA	stage iiia	2013	20239	2019-08-08T16:23:34.429413-05:00	NA	not reported	7th	N2a	0	NA	NA	NA	NA	Not Reported	NA	e0652757-0fda-5035-bb02-1efb084ca857	NA	NA	55	-20239	1958	NA	00bd3937-6d32-59a5-b25e-91c44fa6cdf3	Dead	not hispanic or latino	female	white	584	NA	NA	Radiation Therapy, NOS
TCGA-AR-A0TP	Infiltrating duct carcinoma, NOS	not reported	M0	not reported	T2	Stage IIA	Breast, NOS	No	no	8500/3	C50.9	released	No	not reported	f94691cb-f34a-503e-b0ad-4fcd7d0272c3	Breast, NOS	4275	NA	stage iia	2003	15812	2019-08-08T16:23:34.429413-05:00	NA	not reported	6th	N0	0	NA	NA	NA	NA	Not Reported	NA	2ae4cb75-fe04-5acb-bad4-2a1a2af763c0	NA	NA	43	-15812	1960	NA	4ec84ecf-2b79-5efb-98d4-211d08ab1dcc	Alive	not hispanic or latino	female	white	NA	NA	NA	Radiation Therapy, NOS
TCGA-AR-A0TQ	Infiltrating duct carcinoma, NOS	not reported	M0	not reported	T3	Stage IIIA	Breast, NOS	No	no	8500/3	C50.9	released	No	not reported	e8a51397-1bfd-5295-a6e9-ccd8deb91b94	Breast, NOS	2991	NA	stage iiia	2006	9873	2019-08-08T16:23:34.429413-05:00	NA	not reported	6th	N1	0	NA	NA	NA	NA	Not Reported	NA	3f2555de-5981-5d9a-97b9-849986edbcbc	NA	NA	27	-9873	1979	NA	9319b175-711e-55b5-b0f0-1325e76bdb07	Alive	not hispanic or latino	female	white	NA	NA	NA	Radiation Therapy, NOS
TCGA-AR-A0TR	Infiltrating duct carcinoma, NOS	not reported	M0	not reported	T2	Stage IIB	Breast, NOS	No	no	8500/3	C50.9	released	No	not reported	c5429e02-d38e-577e-bedd-869163e5812a	Breast, NOS	NA	NA	stage iib	2006	25190	2019-08-08T16:23:34.429413-05:00	NA	not reported	NA	N1	0	NA	NA	NA	NA	Not Reported	NA	b87ac7af-e650-5882-9310-016d859c2cfe	NA	NA	68	-25190	1938	2006	2a1ca07d-94f0-553d-8b22-5e8d8db1467b	Dead	not hispanic or latino	female	white	160	NA	NA	Radiation Therapy, NOS
TCGA-AR-A0TV	Infiltrating duct carcinoma, NOS	not reported	M0	not reported	T2	Stage IIA	Breast, NOS	No	no	8500/3	C50.9	released	No	not reported	904207a2-e2b3-579c-bc24-32b78de94111	Breast, NOS	2288	NA	stage iia	2005	24279	2019-08-08T16:23:34.429413-05:00	NA	not reported	6th	N0	0	NA	NA	NA	NA	Not Reported	NA	2329d06c-ebb6-53f5-b905-afdb5dbb5901	NA	NA	66	-24279	1939	NA	3514d0ff-7d27-57b2-984b-5988e3399bf8	Alive	not reported	female	not reported	NA	NA	NA	Radiation Therapy, NOS
TCGA-AR-A0TX	Infiltrating duct carcinoma, NOS	not reported	M0	not reported	T1	Stage IIA	Breast, NOS	No	no	8500/3	C50.9	released	No	not reported	efb7905c-3b1b-503c-a629-713552e5b104	Breast, NOS	1972	NA	stage iia	2005	23653	2019-08-08T16:24:14.720963-05:00	NA	not reported	NA	N1	0	NA	NA	NA	NA	Not Reported	NA	706b6605-d87b-57ac-8284-9455e5289ed5	NA	NA	64	-23653	1941	NA	bbe487e2-5644-541c-a84b-4872e3c0df4b	Alive	not reported	female	not reported	NA	NA	NA	Radiation Therapy, NOS
TCGA-AR-A0U2	Infiltrating duct carcinoma, NOS	not reported	M0	not reported	T2	Stage IIIA	Breast, NOS	No	no	8500/3	C50.9	released	No	not reported	fbd9f6da-7052-5728-bde1-7764ec7cb3ed	Breast, NOS	NA	NA	stage iiia	2004	17390	2019-08-08T16:24:14.720963-05:00	NA	not reported	NA	N2	0	NA	NA	NA	NA	Not Reported	NA	c1a5a2c5-ca00-5866-a260-f4985a6b03bc	NA	NA	47	-17390	1957	2010	65cb2fc1-9421-5dc2-8311-3b7f1e986e56	Dead	not hispanic or latino	female	white	2551	NA	NA	Radiation Therapy, NOS
TCGA-AR-A0U4	Infiltrating duct carcinoma, NOS	not reported	M0	not reported	T2	Stage IIA	Breast, NOS	No	no	8500/3	C50.9	released	No	not reported	cbc21144-d2b1-540c-8ea6-f960a665bc05	Breast, NOS	3261	NA	stage iia	2006	19729	2019-08-08T16:24:14.720963-05:00	NA	not reported	6th	N0	0	NA	NA	NA	NA	Not Reported	NA	06b4863d-6dc2-553d-be41-43e86c67728b	NA	NA	54	-19729	1952	NA	768de56a-e993-5163-a1df-426ccf0bf72e	Alive	not hispanic or latino	female	white	NA	NA	NA	Radiation Therapy, NOS
TCGA-AR-A1AI	Medullary carcinoma, NOS	not reported	M0	not reported	T2	Stage IIA	Breast, NOS	No	no	8510/3	C50.9	released	No	not reported	8862624c-62fe-5e17-b659-688398a352bf	Breast, NOS	3296	NA	stage iia	2005	17229	2019-08-08T16:24:14.720963-05:00	NA	not reported	6th	N0	0	NA	NA	NA	NA	Not Reported	NA	9b850796-1623-591b-84c7-20edee0b2297	NA	NA	47	-17229	1958	NA	7b9db392-e69b-53a3-9162-751662df3c0d	Alive	not hispanic or latino	female	white	NA	NA	NA	Radiation Therapy, NOS
TCGA-AR-A1AJ	Infiltrating duct carcinoma, NOS	not reported	M0	not reported	T1	Stage I	Breast, NOS	No	no	8500/3	C50.9	released	No	not reported	b1d6895c-e0a3-5fab-9b0a-3882b4c163f6	Breast, NOS	2383	NA	stage i	2005	30489	2019-08-08T16:24:14.720963-05:00	NA	not reported	6th	N0	0	NA	NA	NA	NA	Not Reported	NA	ea2da446-2b84-5def-9261-49137db64de6	NA	NA	83	-30489	1922	NA	b62692b7-78e5-505c-a803-b2dc9badc531	Alive	not hispanic or latino	female	white	NA	NA	NA	Radiation Therapy, NOS
TCGA-AR-A1AK	Lobular carcinoma, NOS	not reported	M0	not reported	T1	Stage I	Breast, NOS	No	no	8520/3	C50.9	released	No	not reported	803fb5ac-5697-54a3-a7c0-f6bd26f30b26	Breast, NOS	3159	NA	stage i	2006	25825	2019-08-08T16:24:14.720963-05:00	NA	not reported	6th	N0	0	NA	NA	NA	NA	Not Reported	NA	08cbc367-0e9d-5bd9-82ca-38a493715f87	NA	NA	70	-25825	1936	NA	8b9ec2a7-3689-5621-a12e-36f46f366ee0	Alive	not hispanic or latino	female	white	NA	NA	NA	Radiation Therapy, NOS
TCGA-AR-A1AL	Lobular carcinoma, NOS	not reported	M0	not reported	T3	Stage IIIA	Breast, NOS	No	no	8520/3	C50.9	released	No	not reported	4f0eb3ec-a340-569e-bd65-1b5c4b8696dc	Breast, NOS	2971	NA	stage iiia	2006	22023	2019-08-08T16:24:14.720963-05:00	NA	not reported	6th	N1	0	NA	NA	NA	NA	Not Reported	NA	c7cec896-a536-55dd-9261-629630dd30ec	NA	NA	60	-22023	1946	NA	87374c8d-036b-5450-9862-6cd31b283a28	Alive	not hispanic or latino	female	white	NA	NA	NA	Radiation Therapy, NOS
TCGA-AR-A1AM	Lobular carcinoma, NOS	not reported	M0	not reported	T3	Stage IIIA	Breast, NOS	No	no	8520/3	C50.9	released	No	not reported	96f7da01-6727-5cbb-8df3-95fc9c9faf3c	Breast, NOS	2991	NA	stage iiia	2006	19123	2019-08-08T16:24:14.720963-05:00	NA	not reported	6th	N1	0	NA	NA	NA	NA	Not Reported	NA	ff9500dc-23d9-5771-ac60-500db849b799	NA	NA	52	-19123	1954	NA	c31d0cac-ebf2-51ef-a369-ad3b2bf64a73	Alive	not hispanic or latino	female	white	NA	NA	NA	Radiation Therapy, NOS
TCGA-AR-A1AN	Infiltrating duct carcinoma, NOS	not reported	M0	not reported	T2	Stage IIA	Breast, NOS	No	no	8500/3	C50.9	released	No	not reported	483562bb-bf0c-596e-b503-30fbbf50d1c2	Breast, NOS	2920	NA	stage iia	2006	16974	2019-08-08T16:24:14.720963-05:00	NA	not reported	6th	N0	0	NA	NA	NA	NA	Not Reported	NA	7bad1d7e-db64-53f8-b096-31f1dcf65fa3	NA	NA	46	-16974	1960	NA	020786e1-0e8c-5f54-87f4-748441c8f9e3	Alive	hispanic or latino	female	white	NA	NA	NA	Radiation Therapy, NOS
TCGA-AR-A1AP	Infiltrating duct carcinoma, NOS	not reported	M0	not reported	T1	Stage I	Breast, NOS	No	no	8500/3	C50.9	released	No	not reported	d396c478-8380-531d-865a-27acbfb688aa	Breast, NOS	2856	NA	stage i	2007	29406	2019-08-08T16:24:14.720963-05:00	NA	not reported	6th	N0	0	NA	NA	NA	NA	Not Reported	NA	32061af4-abc6-5344-84e6-66de1460338d	NA	NA	80	-29406	1927	NA	0f769921-d493-58a7-92a0-a595080b72ee	Alive	not hispanic or latino	female	white	NA	NA	NA	Radiation Therapy, NOS
TCGA-AR-A1AQ	Infiltrating duct carcinoma, NOS	not reported	M0	not reported	T2	Stage IIA	Breast, NOS	No	no	8500/3	C50.9	released	No	not reported	75fa4493-019a-5b50-8b17-72dd7b03b599	Breast, NOS	3021	NA	stage iia	2007	18109	2019-08-08T16:24:14.720963-05:00	NA	not reported	6th	N0	0	NA	NA	NA	NA	Not Reported	NA	3dfed2d3-fd6a-57aa-a879-b25b087be752	NA	NA	49	-18109	1958	NA	cd89d30b-fd59-5882-af2e-6955627f6504	Alive	not hispanic or latino	female	white	NA	NA	NA	Radiation Therapy, NOS
TCGA-AR-A1AR	Infiltrating duct carcinoma, NOS	not reported	M0	not reported	T1	Stage IIIA	Breast, NOS	No	yes	8500/3	C50.9	released	Not Reported	not reported	05714139-06b4-5b46-9d6b-a40b8e3ba7eb	Breast, NOS	NA	NA	stage iiia	2007	18482	2019-08-08T16:24:14.720963-05:00	NA	not reported	6th	N2	0	NA	NA	NA	NA	Not Reported	NA	aac8d160-c12d-5fed-b394-2779156b3427	NA	NA	50	-18482	1957	2008	95e8a5f2-722e-51e0-abbf-7f43cdbf608b	Dead	not hispanic or latino	female	white	524	NA	NA	Radiation Therapy, NOS
TCGA-AR-A1AS	Infiltrating duct carcinoma, NOS	not reported	M0	not reported	T2	Stage IIB	Breast, NOS	No	no	8500/3	C50.9	released	No	not reported	8737c011-3e1c-5721-920d-ef7e7248413c	Breast, NOS	1150	NA	stage iib	2007	20028	2019-08-08T16:24:14.720963-05:00	NA	not reported	6th	N1	0	NA	NA	NA	NA	Not Reported	NA	fb31fcfd-a147-59be-add4-6a570d042281	NA	NA	54	-20028	1953	NA	efea0c67-7448-59f7-8e0d-bd90b0e0f32e	Alive	not reported	female	asian	NA	NA	NA	Radiation Therapy, NOS
TCGA-AR-A1AT	Lobular carcinoma, NOS	not reported	M0	not reported	T2	Stage IIA	Breast, NOS	No	no	8520/3	C50.9	released	No	not reported	7cbfa00e-461b-59f1-9944-e6c051d83812	Breast, NOS	NA	NA	stage iia	2007	22942	2019-08-08T16:24:14.720963-05:00	NA	not reported	6th	N0	0	NA	NA	NA	NA	Not Reported	NA	1f6e6cb8-fd6b-5ddf-9da0-64d0e296157b	NA	NA	62	-22942	1945	2010	f85fb816-ea3f-57e5-8b72-d2969732fe55	Dead	not hispanic or latino	female	white	1272	NA	NA	Radiation Therapy, NOS
TCGA-AR-A1AU	Infiltrating duct carcinoma, NOS	not reported	M0	not reported	T2	Stage IIIA	Breast, NOS	No	no	8500/3	C50.9	released	No	not reported	a646ad61-e2f8-5bbf-8f51-2c32ba820071	Breast, NOS	2868	NA	stage iiia	2007	14564	2019-08-08T16:24:14.720963-05:00	NA	not reported	6th	N2	0	NA	NA	NA	NA	Not Reported	NA	dbb39230-01a0-5e6b-b6c2-2b83d0b8d24a	NA	NA	39	-14564	1968	NA	d8697fe1-65d1-58ff-aad1-7e51cfb94947	Alive	not hispanic or latino	female	white	NA	NA	NA	Radiation Therapy, NOS
TCGA-AR-A1AW	Infiltrating duct carcinoma, NOS	not reported	M0	not reported	T2	Stage IIA	Breast, NOS	No	no	8500/3	C50.9	released	No	not reported	69d87fa5-dd50-5502-9363-7081de73ddcd	Breast, NOS	2632	NA	stage iia	2007	23855	2019-08-08T16:24:14.720963-05:00	NA	not reported	6th	N0	0	NA	NA	NA	NA	Not Reported	NA	ee23ebad-fe15-5b70-8471-9cfe2e2f60c1	NA	NA	65	-23855	1942	NA	a6ca61cb-bb36-58d8-98d9-fe5fd8841afc	Alive	not hispanic or latino	female	white	NA	NA	NA	Radiation Therapy, NOS
TCGA-AR-A1AX	Infiltrating duct carcinoma, NOS	not reported	M0	not reported	T1	Stage I	Breast, NOS	No	no	8500/3	C50.9	released	No	not reported	e9841d3b-f344-5f71-813a-2e59166dd850	Breast, NOS	2629	NA	stage i	2007	23507	2019-08-08T16:24:14.720963-05:00	NA	not reported	6th	N0	0	NA	NA	NA	NA	Not Reported	NA	67d79aab-2691-5712-b5a2-f1adbecca797	NA	NA	64	-23507	1943	NA	df6a4380-1e1c-595e-afed-a5190dfce072	Alive	not hispanic or latino	female	white	NA	NA	NA	Radiation Therapy, NOS
TCGA-AR-A1AY	Infiltrating duct carcinoma, NOS	not reported	M0	not reported	T1	Stage I	Breast, NOS	No	no	8500/3	C50.9	released	No	not reported	2df6ab5f-7b18-5133-bc5d-998d209083a0	Breast, NOS	1026	NA	stage i	2008	23927	2019-08-08T16:24:14.720963-05:00	NA	not reported	6th	N0	0	NA	NA	NA	NA	Not Reported	NA	1f6731ca-7ead-5590-b42a-7f5ba05d3c5e	NA	NA	65	-23927	1943	NA	171e0f13-61ef-51ea-b3cc-d5ca69c995e2	Alive	not hispanic or latino	female	white	NA	NA	NA	Radiation Therapy, NOS
TCGA-AR-A24K	Infiltrating duct carcinoma, NOS	not reported	M0	not reported	T2	Stage IIA	Breast, NOS	No	no	8500/3	C50.9	released	No	not reported	12d2e280-95d9-5baa-a72d-f80317de2692	Breast, NOS	1548	NA	stage iia	2004	16961	2019-08-08T16:24:14.720963-05:00	NA	not reported	6th	N0	0	NA	NA	NA	NA	Not Reported	NA	57fac8d8-0fa7-5de6-a297-3863ab2681fd	NA	NA	46	-16961	1958	NA	fe49f852-a07c-5b64-8f7c-f4689fd13b40	Alive	not reported	female	white	NA	NA	NA	Radiation Therapy, NOS
TCGA-AR-A24L	Infiltrating duct carcinoma, NOS	not reported	M0	not reported	T2	Stage IIB	Breast, NOS	No	no	8500/3	C50.9	released	No	not reported	b830854d-64aa-5bb9-b9d7-634ff2c20619	Breast, NOS	2221	NA	stage iib	2005	9706	2019-08-08T16:24:14.720963-05:00	NA	not reported	6th	N1	0	NA	NA	NA	NA	Not Reported	NA	05355bbb-e6ac-50c9-b9c4-b9dba3dc0124	NA	NA	26	-9706	1979	NA	c593d618-e5a4-54b8-bc9b-8c4b88c0d2b1	Dead	not hispanic or latino	female	white	2866	NA	NA	Radiation Therapy, NOS
TCGA-AR-A24M	Infiltrating duct and lobular carcinoma	not reported	M0	not reported	T2	Stage IIIA	Breast, NOS	No	no	8522/3	C50.9	released	No	not reported	ebafc5e3-0ddd-5825-8cb3-f4dbe1f563d3	Breast, NOS	3660	NA	stage iiia	2005	14119	2019-08-08T16:24:14.720963-05:00	NA	not reported	6th	N2	0	NA	NA	NA	NA	Not Reported	NA	38b31a9b-7ca2-56f7-8eb1-4274f0551aa1	NA	NA	38	-14119	1967	NA	5e71229c-9b18-5aba-a066-6f5d037f1c39	Alive	not hispanic or latino	female	white	NA	NA	NA	Radiation Therapy, NOS
TCGA-AR-A24N	Infiltrating duct carcinoma, NOS	not reported	M0	not reported	T1	Stage I	Breast, NOS	No	no	8500/3	C50.9	released	No	not reported	f9630094-86ba-5a9e-9e86-556b19c2b338	Breast, NOS	3035	NA	stage i	2005	19989	2019-08-08T16:24:14.720963-05:00	NA	not reported	6th	N0	0	NA	NA	NA	NA	Not Reported	NA	58d2d44f-8bd5-5728-9b59-cc7b85ec8f03	NA	NA	54	-19989	1951	NA	2ed6a99f-7873-5c07-b14c-f5db4727de41	Alive	not hispanic or latino	female	white	NA	NA	NA	Radiation Therapy, NOS
TCGA-AR-A24O	Infiltrating duct and lobular carcinoma	not reported	M0	not reported	T3	Stage IIIA	Breast, NOS	No	no	8522/3	C50.9	released	No	not reported	c2d98942-0823-5cf4-859b-85dbeaf3568f	Breast, NOS	3607	NA	stage iiia	2005	15977	2019-08-08T16:24:14.720963-05:00	NA	not reported	6th	N2	0	NA	NA	NA	NA	Not Reported	NA	60825691-a5a3-53fb-84ee-79d364d4d78a	NA	NA	43	-15977	1962	NA	cc38291b-19a6-5657-a56f-4df2161cc321	Alive	not hispanic or latino	female	white	NA	NA	NA	Radiation Therapy, NOS
TCGA-AR-A24P	Infiltrating duct carcinoma, NOS	not reported	M0	not reported	T1	Stage I	Breast, NOS	No	no	8500/3	C50.9	released	No	not reported	5f671dba-612d-5cf1-9749-7ba3d57f3ed5	Breast, NOS	84	NA	stage i	2005	17490	2019-08-08T16:24:14.720963-05:00	NA	not reported	6th	N0	0	NA	NA	NA	NA	Not Reported	NA	ddaf34a9-8048-5dc5-9f03-a624a5fe4e75	NA	NA	47	-17490	1958	NA	aa01f299-bece-5fe4-872b-67ba72fbd994	Alive	not hispanic or latino	female	white	NA	NA	NA	Radiation Therapy, NOS
TCGA-AR-A24Q	Infiltrating duct carcinoma, NOS	not reported	M0	not reported	T3	Stage IIB	Breast, NOS	No	no	8500/3	C50.9	released	No	not reported	2597601a-f994-5801-a0f6-37c38e30485e	Breast, NOS	3172	NA	stage iib	2006	18084	2019-08-08T16:24:14.720963-05:00	NA	not reported	6th	N0	0	NA	NA	NA	NA	Not Reported	NA	9fbfceb7-d785-50da-a258-1a1268d5b12d	NA	NA	49	-18084	1957	NA	6dcfcb4b-49d6-5c2d-b897-1e12204a7d98	Alive	not reported	female	white	NA	NA	NA	Radiation Therapy, NOS
TCGA-AR-A24R	Infiltrating duct carcinoma, NOS	not reported	M0	not reported	T1	Stage IIIA	Breast, NOS	No	no	8500/3	C50.9	released	No	not reported	02588c42-b8bf-52cb-ac54-964c49a18838	Breast, NOS	3430	NA	stage iiia	2006	16642	2019-08-08T16:24:14.720963-05:00	NA	not reported	6th	N2	0	NA	NA	NA	NA	Not Reported	NA	8ec97068-a032-5063-ae6e-6e9ffec686e4	NA	NA	45	-16642	1961	NA	97269975-c741-50c3-b870-c75d6af17fb2	Alive	not hispanic or latino	female	white	NA	NA	NA	Radiation Therapy, NOS
TCGA-AR-A24S	Infiltrating duct carcinoma, NOS	not reported	M0	not reported	T1	Stage I	Breast, NOS	No	no	8500/3	C50.9	released	No	not reported	92e6754f-95a2-58c9-abf9-ba22839114dd	Breast, NOS	2976	NA	stage i	2006	22587	2019-08-08T16:24:14.720963-05:00	NA	not reported	6th	N0	0	NA	NA	NA	NA	Not Reported	NA	38ac6bcc-2b73-593d-914a-bc48c9310418	NA	NA	61	-22587	1945	NA	856f4e13-a8ea-5ee3-8633-b292834e9489	Alive	not hispanic or latino	female	white	NA	NA	NA	Radiation Therapy, NOS
TCGA-AR-A24T	Lobular carcinoma, NOS	not reported	M0	not reported	T3	Stage IIIC	Breast, NOS	No	no	8520/3	C50.9	released	No	not reported	d8ffc448-d1ba-5e9c-afab-7c2051824911	Breast, NOS	3202	NA	stage iiic	2006	17135	2019-08-08T16:24:14.720963-05:00	NA	not reported	6th	N3	0	NA	NA	NA	NA	Not Reported	NA	56a30508-011a-58d7-b1b6-7bce2faf74f8	NA	NA	46	-17135	1960	NA	d63bf4a4-1c52-540d-b6e0-95b2503890fb	Alive	not hispanic or latino	female	white	NA	NA	NA	Radiation Therapy, NOS
TCGA-AR-A24U	Infiltrating duct carcinoma, NOS	not reported	M0	not reported	T1	Stage IIA	Breast, NOS	No	no	8500/3	C50.9	released	No	not reported	d88e46f8-8daa-5eb9-821f-d2f2ef792565	Breast, NOS	3128	NA	stage iia	2006	17523	2019-08-08T16:24:14.720963-05:00	NA	not reported	6th	N1	0	NA	NA	NA	NA	Not Reported	NA	f4f92c90-00ba-5ab4-b8d8-bb876f271569	NA	NA	47	-17523	1959	NA	300471a6-2be5-596a-b83e-e2046c6a2ee2	Alive	not hispanic or latino	female	white	NA	NA	NA	Radiation Therapy, NOS
TCGA-AR-A24V	Infiltrating duct carcinoma, NOS	not reported	M0	not reported	T2	Stage IIB	Breast, NOS	No	no	8500/3	C50.9	released	No	not reported	5d192014-2bef-583f-8fcc-f649deafd070	Breast, NOS	3203	NA	stage iib	2006	19027	2019-08-08T16:24:14.720963-05:00	NA	not reported	6th	N1	0	NA	NA	NA	NA	Not Reported	NA	d6e97093-1759-59a2-b200-604cb8c618f3	NA	NA	52	-19027	1954	NA	d40738be-7e94-53eb-ad1c-213964c6eafd	Alive	not hispanic or latino	female	white	NA	NA	NA	Radiation Therapy, NOS
TCGA-AR-A24W	Infiltrating duct carcinoma, NOS	not reported	M0	not reported	T2	Stage IIB	Breast, NOS	No	no	8500/3	C50.9	released	No	not reported	0143b634-d731-5d48-8475-7c73b7000e7a	Breast, NOS	1550	NA	stage iib	2006	20123	2019-08-08T16:24:14.720963-05:00	NA	not reported	6th	N1	0	NA	NA	NA	NA	Not Reported	NA	462f7142-a3f9-5ab5-aad5-e8d5db97d0fd	NA	NA	55	-20123	1951	NA	f238cd2d-70c7-5022-ac7a-7f57edb6f663	Alive	not reported	female	white	NA	NA	NA	Radiation Therapy, NOS
TCGA-AR-A24X	Infiltrating duct and lobular carcinoma	not reported	M0	not reported	T2	Stage IIA	Breast, NOS	No	no	8522/3	C50.9	released	No	not reported	34b28421-0e20-5698-a6bf-52c6de930943	Breast, NOS	3004	NA	stage iia	2006	19030	2019-08-08T16:24:14.720963-05:00	NA	not reported	6th	N0	0	NA	NA	NA	NA	Not Reported	NA	0f4bacad-009f-5150-b8f7-8ccec17ec6b6	NA	NA	52	-19030	1954	NA	7c36a0ee-b556-551a-84eb-74b79ac43dab	Alive	not reported	female	white	NA	NA	NA	Radiation Therapy, NOS
TCGA-AR-A24Z	Infiltrating duct carcinoma, NOS	not reported	M0	not reported	T2	Stage IIA	Breast, NOS	No	no	8500/3	C50.9	released	No	not reported	fd928ef0-7e92-57be-833c-d976d6e5dc80	Breast, NOS	3001	NA	stage iia	2006	20900	2019-08-08T16:24:14.720963-05:00	NA	not reported	6th	N0	0	NA	NA	NA	NA	Not Reported	NA	fd758015-34f9-550e-bb59-4e7ab8e17def	NA	NA	57	-20900	1949	NA	b35c765c-9dd6-5ae2-b06c-42d05a5d1b29	Alive	not reported	female	white	NA	NA	NA	Radiation Therapy, NOS
TCGA-AR-A250	Infiltrating duct carcinoma, NOS	not reported	M0	not reported	T2	Stage IIA	Breast, NOS	No	no	8500/3	C50.9	released	No	not reported	5c591d54-c01c-5377-b305-57cd5de6720e	Breast, NOS	2707	NA	stage iia	2006	21309	2019-08-08T16:24:14.720963-05:00	NA	not reported	6th	N0	0	NA	NA	NA	NA	Not Reported	NA	fab5c4d5-d7cf-58a4-ac25-13f73a868978	NA	NA	58	-21309	1948	NA	2b7f482a-8193-5bfb-bead-f9274f6a137b	Alive	not hispanic or latino	female	white	NA	NA	NA	Radiation Therapy, NOS
TCGA-AR-A251	Infiltrating duct carcinoma, NOS	not reported	M0	not reported	T2	Stage IIIA	Breast, NOS	No	no	8500/3	C50.9	released	No	not reported	591c58d8-d324-528a-985d-c80124dae2e8	Breast, NOS	3030	NA	stage iiia	2006	18771	2019-08-08T16:24:14.720963-05:00	NA	not reported	6th	N2	0	NA	NA	NA	NA	Not Reported	NA	017eef2e-5c00-5dd7-bc61-f490b7724631	NA	NA	51	-18771	1955	NA	9b1440be-8ed5-5c5e-bae8-920d1b9c19e9	Alive	not hispanic or latino	female	white	NA	NA	NA	Radiation Therapy, NOS
TCGA-AR-A252	Infiltrating duct carcinoma, NOS	not reported	M0	not reported	T1	Stage I	Breast, NOS	No	no	8500/3	C50.9	released	No	not reported	ee91ada6-093d-51e9-95a4-c199fb6848c3	Breast, NOS	2838	NA	stage i	2007	18611	2019-08-08T16:24:14.720963-05:00	NA	not reported	6th	N0	0	NA	NA	NA	NA	Not Reported	NA	f6e4e643-657e-57a3-9c66-4c8560d10395	NA	NA	50	-18611	1957	NA	0ad1ddb1-4193-5380-876c-1f7de47c97d8	Alive	not hispanic or latino	female	white	NA	NA	NA	Radiation Therapy, NOS
TCGA-AR-A254	Infiltrating duct carcinoma, NOS	not reported	M0	not reported	T2	Stage IIIA	Breast, NOS	No	no	8500/3	C50.9	released	No	not reported	f1986164-265b-5492-9d12-a3b15e55d29e	Breast, NOS	2605	NA	stage iiia	2007	18270	2019-08-08T16:24:14.720963-05:00	NA	not reported	6th	N2	0	NA	NA	NA	NA	Not Reported	NA	42f84059-5349-5345-802f-168150ea2d5e	NA	NA	50	-18270	1957	NA	84a0c597-4af2-5d24-ab40-c13c35aa0c75	Alive	not hispanic or latino	female	white	NA	NA	NA	Radiation Therapy, NOS
TCGA-AR-A255	Infiltrating duct carcinoma, NOS	not reported	M0	not reported	T1	Stage I	Breast, NOS	No	no	8500/3	C50.9	released	No	not reported	d8db8d89-7795-5ca2-ad31-87af88adadf3	Breast, NOS	2161	NA	stage i	2007	22809	2019-08-08T16:24:14.720963-05:00	NA	not reported	6th	N0	0	NA	NA	NA	NA	Not Reported	NA	d92bc49d-1ec1-5c71-a36c-1808d90bf964	NA	NA	62	-22809	1945	NA	48ddcca5-2351-580c-b412-e4a0bba27ac0	Alive	not hispanic or latino	female	white	NA	NA	NA	Radiation Therapy, NOS
TCGA-AR-A256	Infiltrating duct carcinoma, NOS	not reported	M0	not reported	T2	Stage IIA	Breast, NOS	No	no	8500/3	C50.9	released	No	not reported	d309a0fd-7a46-5bd9-babc-880e96c2167f	Breast, NOS	NA	NA	stage iia	2001	16642	2019-08-08T16:24:14.720963-05:00	NA	not reported	5th	N0	0	NA	NA	NA	NA	Not Reported	NA	2fe7ec9e-b56b-5448-93d8-ca3c7c4190e5	NA	NA	45	-16642	1956	2008	4b57f09c-3beb-55bb-a446-60272ecc2b83	Dead	not reported	female	white	2854	NA	NA	Radiation Therapy, NOS
TCGA-AR-A2LE	Lobular carcinoma, NOS	not reported	M0	not reported	T1	Stage I	Breast, NOS	No	no	8520/3	C50.9	released	No	not reported	b4952c75-aac6-5906-908a-753f7d872caf	Breast, NOS	5062	NA	stage i	2001	25499	2019-08-08T16:24:14.720963-05:00	NA	not reported	5th	N0	0	NA	NA	NA	NA	Not Reported	NA	c095399b-dfd8-5f45-bb86-649b662a84e3	NA	NA	69	-25499	1932	NA	7e37f853-ef4b-58fc-818c-f25b46c0cf54	Alive	not hispanic or latino	female	white	NA	NA	NA	Radiation Therapy, NOS
TCGA-AR-A2LJ	Lobular carcinoma, NOS	not reported	MX	not reported	T3	Stage IIIA	Breast, NOS	No	no	8520/3	C50.9	released	No	not reported	1540326d-f7ac-5fc2-a072-1ceb1710deae	Breast, NOS	2632	NA	stage iiia	2007	14723	2019-08-08T16:24:46.807013-05:00	NA	not reported	6th	N1	0	NA	NA	NA	NA	Not Reported	NA	19015ad9-a615-57ad-befa-1d34238dea20	NA	NA	40	-14723	1967	NA	9abdb2a6-256b-5407-87ba-47e4d6251ff0	Alive	not hispanic or latino	female	white	NA	NA	NA	Radiation Therapy, NOS
TCGA-AR-A2LK	Lobular carcinoma, NOS	not reported	M0	not reported	T3	Stage III	Breast, NOS	No	no	8520/3	C50.9	released	No	not reported	1f41548f-081a-5bc8-937e-58e6205f3794	Breast, NOS	1304	NA	stage iii	2007	22800	2019-08-08T16:24:46.807013-05:00	NA	not reported	6th	N2	0	NA	NA	NA	NA	Not Reported	NA	a9a5de8e-6b85-52c7-8758-2b57aba42e96	NA	NA	62	-22800	1945	NA	87c1e29e-58be-5256-ae29-1fcb3d920cc3	Dead	not hispanic or latino	female	white	1649	NA	NA	Radiation Therapy, NOS
TCGA-AR-A2LL	Lobular carcinoma, NOS	not reported	M0	not reported	T3	Stage IIB	Breast, NOS	No	yes	8520/3	C50.9	released	Not Reported	not reported	8b380c16-e9a4-5170-930a-b8108ac09ddb	Breast, NOS	2012	NA	stage iib	2007	25747	2019-08-08T16:24:46.807013-05:00	NA	not reported	6th	N0	0	NA	NA	NA	NA	Not Reported	NA	bb939463-d1c5-5e34-be89-6446a5a35886	NA	NA	70	-25747	1937	NA	a085d9d0-1e31-5f49-88d3-8de167762ee8	Alive	not hispanic or latino	female	white	NA	NA	NA	Radiation Therapy, NOS
TCGA-AR-A2LM	Lobular carcinoma, NOS	not reported	M0	not reported	T1	Stage II	Breast, NOS	No	no	8520/3	C50.9	released	No	not reported	b9e59d61-7da3-5c1f-9c1d-e9db9a9d4689	Breast, NOS	1935	NA	stage ii	2007	18053	2019-08-08T16:24:46.807013-05:00	NA	not reported	6th	N1	0	NA	NA	NA	NA	Not Reported	NA	edb00d73-7b59-5f01-b8fc-17c241cc1ab5	NA	NA	49	-18053	1958	NA	33f8f7e7-a3d6-5e29-90bb-42613833e29e	Alive	not hispanic or latino	female	white	NA	NA	NA	Radiation Therapy, NOS
TCGA-AR-A2LO	Lobular carcinoma, NOS	not reported	M0	not reported	T2	Stage IIB	Breast, NOS	No	no	8520/3	C50.9	released	No	not reported	7eb89dc5-57c8-5506-95d7-d6d1a58506b6	Breast, NOS	1198	NA	stage iib	2010	17080	2019-08-08T16:24:46.807013-05:00	NA	not reported	7th	N1	0	NA	NA	NA	NA	Not Reported	NA	04d38cfd-9089-50bf-ac57-26ee91d63bdc	NA	NA	46	-17080	1964	NA	aea90f0e-fef5-565b-b043-2acece64e16d	Alive	not hispanic or latino	female	white	NA	NA	NA	Radiation Therapy, NOS
TCGA-AR-A2LR	Metaplastic carcinoma, NOS	not reported	M0	not reported	T1	Stage I	Breast, NOS	No	yes	8575/3	C50.9	released	Not Reported	not reported	8829d1ac-5dbd-5cab-93ba-c644149e32cf	Breast, NOS	1742	NA	stage i	2010	18214	2019-08-08T16:24:46.807013-05:00	NA	not reported	7th	N0	0	NA	NA	NA	NA	Not Reported	NA	bb012f3c-5d96-51db-be4f-2946adeaf0e6	NA	NA	49	-18214	1961	NA	c5cfe049-bcfb-5a42-ac86-52cedc51dad2	Alive	not hispanic or latino	female	white	NA	NA	NA	Radiation Therapy, NOS
TCGA-AR-A5QM	Lobular carcinoma, NOS	not reported	M0	not reported	T2	Stage IIA	Breast, NOS	No	yes	8520/3	C50.9	released	Not Reported	not reported	31279560-6b67-545f-ae10-500288f1890d	Breast, NOS	2231	NA	stage iia	2008	22780	2019-08-08T16:24:46.807013-05:00	NA	not reported	6th	N0	0	NA	NA	NA	NA	Not Reported	NA	6ecf0d44-72c7-5875-b4c9-86161970ad47	NA	NA	62	-22780	1946	NA	fbbafe8b-23ac-5682-9199-076115998a31	Alive	not hispanic or latino	female	white	NA	NA	NA	Radiation Therapy, NOS
TCGA-AR-A5QN	Lobular carcinoma, NOS	not reported	M0	not reported	T2	Stage IIIC	Breast, NOS	No	no	8520/3	C50.9	released	No	not reported	feaf53fc-ec47-5f8d-b29c-9136e0e80387	Breast, NOS	1013	NA	stage iiic	2012	25089	2019-08-08T16:24:46.807013-05:00	NA	not reported	7th	N3	0	NA	NA	NA	NA	Not Reported	NA	9b8e218b-127e-5e97-b913-ccae3f72d67a	NA	NA	68	-25089	1944	NA	f635d380-991a-52bd-ba21-bb120b45ce44	Alive	not hispanic or latino	female	white	NA	NA	NA	Radiation Therapy, NOS
TCGA-AR-A5QP	Lobular carcinoma, NOS	not reported	M0	not reported	T2	Stage IIB	Breast, NOS	No	no	8520/3	C50.9	released	No	not reported	de664f09-7cbf-55a2-bb5b-4205600ca1d3	Breast, NOS	1185	NA	stage iib	2011	19805	2019-08-08T16:24:46.807013-05:00	NA	not reported	7th	N1	0	NA	NA	NA	NA	Not Reported	NA	3d4a967e-4b53-5a53-95c0-4f8dfe29b285	NA	NA	54	-19805	1957	NA	22649530-3ab5-5d6d-8935-97126585aab2	Alive	not hispanic or latino	female	white	NA	NA	NA	Radiation Therapy, NOS
TCGA-AR-A5QQ	Metaplastic carcinoma, NOS	not reported	M0	not reported	T3	Stage IIIA	Breast, NOS	No	no	8575/3	C50.9	released	No	not reported	a47133d4-78a6-526e-b166-97f7cb7154e4	Breast, NOS	NA	NA	stage iiia	2011	24841	2019-08-08T16:24:46.807013-05:00	NA	not reported	7th	N1	0	NA	NA	NA	NA	Not Reported	NA	531e358c-fdaf-50d1-a24b-0cbaf3e293c3	NA	NA	68	-24841	1943	2011	b425089b-af90-5245-8d49-8df28ba1e569	Dead	not hispanic or latino	female	white	322	NA	NA	Radiation Therapy, NOS
TCGA-B6-A0I1	Infiltrating duct carcinoma, NOS	not reported	M0	not reported	T2	Stage IIA	Breast, NOS	No	no	8500/3	C50.9	released	No	not reported	b5d064de-7697-57e5-af4a-b8e867ef1b57	Breast, NOS	NA	NA	stage iia	1998	26902	2019-08-08T16:24:46.807013-05:00	NA	not reported	5th	N0	0	NA	NA	NA	NA	Not Reported	NA	652b7ab6-af74-57e0-8b5b-e93e21e36ac4	NA	NA	73	-26902	1925	2004	9f1d5c3f-f926-5594-aa24-c12d170a8fd2	Dead	not hispanic or latino	female	black or african american	2361	NA	NA	Radiation Therapy, NOS
TCGA-B6-A0IK	Infiltrating duct carcinoma, NOS	not reported	M0	not reported	T4	Stage IIIB	Breast, NOS	No	no	8500/3	C50.9	released	No	not reported	f12376bc-6e8a-5ac0-aedf-538ef70e1407	Breast, NOS	NA	NA	stage iiib	1994	23150	2019-08-08T16:24:46.807013-05:00	NA	not reported	4th	N1	0	NA	NA	NA	NA	Not Reported	NA	d5ef80f3-8ae3-5574-ae62-91b452f6db5a	NA	NA	63	-23150	1931	1995	9a206ac3-aff1-50c1-bef7-af77267e1afd	Dead	not hispanic or latino	female	white	571	NA	NA	Radiation Therapy, NOS
TCGA-B6-A0RE	Infiltrating duct carcinoma, NOS	not reported	M0	not reported	TX	Stage X	Breast, NOS	No	no	8500/3	C50.9	released	No	not reported	bd1910ec-4316-5dfa-b8a3-615a4ea5b944	Breast, NOS	7777	NA	stage x	1989	22449	2019-08-08T16:24:46.807013-05:00	NA	not reported	NA	N0 (i-)	0	NA	NA	NA	NA	Not Reported	NA	dda74c27-8918-5614-9526-e339693e74a3	NA	NA	61	-22449	1928	NA	c23ea384-a6c0-59e8-9156-861ee004bb44	Alive	not hispanic or latino	female	black or african american	NA	NA	NA	Radiation Therapy, NOS
TCGA-B6-A0RG	Infiltrating duct carcinoma, NOS	not reported	M0	not reported	T3	Stage IIB	Breast, NOS	No	no	8500/3	C50.9	released	No	not reported	977a56cf-41d8-57d1-934d-23d289d7c3a7	Breast, NOS	2082	NA	stage iib	1991	9840	2019-08-08T16:24:46.807013-05:00	NA	not reported	4th	N0 (i-)	0	NA	NA	NA	NA	Not Reported	NA	b007d5c0-ca82-51b0-8d14-14561524149d	NA	NA	26	-9840	1965	NA	0964cff6-33e5-56fd-9cd6-e583801feb71	Alive	not hispanic or latino	female	white	NA	NA	NA	Radiation Therapy, NOS
TCGA-B6-A0RI	Infiltrating duct carcinoma, NOS	not reported	M0	not reported	T4b	Stage IIIB	Breast, NOS	No	no	8500/3	C50.9	released	No	not reported	ac8bfa55-cb65-577f-971b-45251a8f475c	Breast, NOS	7126	NA	stage iiib	1992	16138	2019-08-08T16:24:46.807013-05:00	NA	not reported	3rd	N1b	0	NA	NA	NA	NA	Not Reported	NA	7c0339f6-cb4d-5f8c-b5d7-157326d73d38	NA	NA	44	-16138	1948	NA	d04e47db-86a9-5265-ae86-b4954f2bea35	Alive	not hispanic or latino	female	white	NA	NA	NA	Radiation Therapy, NOS
TCGA-B6-A0RL	Infiltrating duct carcinoma, NOS	not reported	M0	not reported	T2	Stage IIA	Breast, NOS	No	no	8500/3	C50.9	released	No	not reported	2d80ee08-d10e-52eb-9bc5-f1677f5d99ca	Breast, NOS	NA	NA	stage iia	1993	22238	2019-08-08T16:24:46.807013-05:00	NA	not reported	4th	N0 (i-)	0	NA	NA	NA	NA	Not Reported	NA	3a7b90b3-7b94-5d2f-b3b7-f21df1de9eca	NA	NA	60	-22238	1933	1999	85ed77a3-b038-58f9-ba2c-ed383ae8f4cd	Dead	not hispanic or latino	female	black or african american	2469	NA	NA	Radiation Therapy, NOS
TCGA-B6-A0RM	Infiltrating duct carcinoma, NOS	not reported	MX	not reported	TX	Stage X	Breast, NOS	No	no	8500/3	C50.9	released	No	not reported	2e6f3c3f-a1c8-52e8-b787-d91827502e1c	Breast, NOS	NA	NA	stage x	1993	21047	2019-08-08T16:24:46.807013-05:00	NA	not reported	4th	NX	0	NA	NA	NA	NA	Not Reported	NA	4922d609-8c94-51fe-ac2b-7c32706ce8b9	NA	NA	57	-21047	1936	1999	41581b05-576c-5402-9265-24049fe99408	Dead	not hispanic or latino	female	black or african american	2373	NA	NA	Radiation Therapy, NOS
TCGA-B6-A0RN	Infiltrating duct carcinoma, NOS	not reported	M0	not reported	T1c	Stage IA	Breast, NOS	No	no	8500/3	C50.9	released	No	not reported	6474a260-78d7-542f-ad94-41eb1f91bd3e	Breast, NOS	8008	NA	stage ia	1993	22077	2019-08-08T16:24:46.807013-05:00	NA	not reported	NA	N0 (i-)	0	NA	NA	NA	NA	Not Reported	NA	c8412728-0313-53f4-8093-a0999c4086e5	NA	NA	60	-22077	1933	NA	e16dace8-2031-53dc-bb29-32755388c104	Alive	not hispanic or latino	female	white	NA	NA	NA	Radiation Therapy, NOS
TCGA-B6-A0RO	Infiltrating duct carcinoma, NOS	not reported	M0	not reported	T4	Stage IIIB	Breast, NOS	No	no	8500/3	C50.9	released	No	not reported	ea7584f3-14e3-56d1-aaa0-1196f83f73a0	Breast, NOS	4929	NA	stage iiib	1993	26269	2019-08-08T16:24:46.807013-05:00	NA	not reported	4th	N1a	0	NA	NA	NA	NA	Not Reported	NA	7cbe88f9-fb4c-5940-a023-a59fafefc35c	NA	NA	71	-26269	1922	NA	2777d501-b5e4-5e74-8f5a-1ee9ba93211a	Alive	not hispanic or latino	female	white	NA	NA	NA	Radiation Therapy, NOS
TCGA-B6-A0RP	Infiltrating duct and lobular carcinoma	not reported	M0	not reported	T2	NA	Breast, NOS	No	no	8522/3	C50.9	released	No	not reported	b8e057dc-aedb-5203-a5ed-ec0d18e9d142	Breast, NOS	NA	NA	not reported	1994	26941	2019-08-08T16:24:46.807013-05:00	NA	not reported	4th	N1b	0	NA	NA	NA	NA	Not Reported	NA	80d88a13-2338-5602-a74a-f4feba2d59c4	NA	NA	73	-26941	1921	2002	7495a0e1-3fe5-5203-a164-d09e7b25f1a0	Dead	not hispanic or latino	female	white	3126	NA	NA	Radiation Therapy, NOS
TCGA-B6-A0RS	Infiltrating duct carcinoma, NOS	not reported	M0	not reported	T2	Stage IIA	Breast, NOS	No	no	8500/3	C50.9	released	No	not reported	11c5a2e5-5a80-558d-847f-838f7129de82	Breast, NOS	NA	NA	stage iia	1988	14134	2019-08-08T16:24:46.807013-05:00	NA	not reported	3rd	N0 (i-)	0	NA	NA	NA	NA	Not Reported	NA	f154d420-c949-59cb-9069-d790a8a9685c	NA	NA	38	-14134	1950	1996	5349e1be-e8dc-521c-85a9-2d9048b533e2	Dead	not hispanic or latino	female	white	3063	NA	NA	Radiation Therapy, NOS
TCGA-B6-A0RT	Infiltrating duct carcinoma, NOS	not reported	M0	not reported	T3	Stage IIIA	Breast, NOS	No	no	8500/3	C50.9	released	No	not reported	a6c42e7b-a8f3-5f71-baec-9bf4610988e3	Breast, NOS	2721	NA	stage iiia	1996	14374	2019-08-08T16:24:46.807013-05:00	NA	not reported	4th	N1	0	NA	NA	NA	NA	Not Reported	NA	a3330596-80a8-5911-89bd-1b0e912bce2e	NA	NA	39	-14374	1957	NA	af045d7f-2402-5ca3-b8c3-168c0730b127	Alive	not hispanic or latino	female	white	NA	NA	NA	Radiation Therapy, NOS
TCGA-B6-A0RU	Infiltrating duct mixed with other types of carcinoma	not reported	M0	not reported	T1c	Stage IA	Breast, NOS	No	no	8523/3	C50.9	released	No	not reported	9e45a4b3-3b5a-559a-9fb3-eab4a7789517	Breast, NOS	8605	NA	stage ia	1990	14920	2019-08-08T16:24:46.807013-05:00	NA	not reported	3rd	N0 (i-)	0	NA	NA	NA	NA	Not Reported	NA	cdb5a03b-fadd-57f3-b7e7-43857a5bf355	NA	NA	40	-14920	1950	NA	4eb47669-8017-5208-a278-ca28e40aaa59	Alive	not hispanic or latino	female	white	NA	NA	NA	Radiation Therapy, NOS
TCGA-B6-A0RV	Infiltrating duct and lobular carcinoma	not reported	M0	not reported	T3	Stage IIIA	Breast, NOS	No	no	8522/3	C50.9	released	No	not reported	94a108a8-c204-53c7-afe7-cdd59c1a6dc0	Breast, NOS	5156	NA	stage iiia	1996	15507	2019-08-08T16:24:46.807013-05:00	NA	not reported	4th	N2	0	NA	NA	NA	NA	Not Reported	NA	f943aff8-89a9-568f-99fa-60e6679ecf8e	NA	NA	42	-15507	1954	NA	88e5447e-a2f1-504d-9199-285ee635fbb0	Alive	not hispanic or latino	female	white	NA	NA	NA	Radiation Therapy, NOS
TCGA-B6-A0WT	Infiltrating duct carcinoma, NOS	not reported	M0	not reported	T2	Stage IIB	Breast, NOS	No	no	8500/3	C50.9	released	No	not reported	7f7fb66a-523f-51e6-a86b-5b713d281e85	Breast, NOS	5739	NA	stage iib	1995	22362	2019-08-08T16:24:46.807013-05:00	NA	not reported	4th	N1	0	NA	NA	NA	NA	Not Reported	NA	7df12940-5ede-5327-9e01-e47f18e460c9	NA	NA	61	-22362	1934	NA	01881c3c-823c-53f5-89cb-0bcbc67603a6	Alive	not hispanic or latino	female	white	NA	NA	NA	Radiation Therapy, NOS
TCGA-B6-A0WV	Infiltrating duct carcinoma, NOS	not reported	M0	not reported	T2	Stage IIB	Breast, NOS	No	no	8500/3	C50.9	released	No	not reported	569aaa89-cee5-5413-81b7-380912a279ee	Breast, NOS	NA	NA	stage iib	1995	24803	2019-08-08T16:24:46.807013-05:00	NA	not reported	4th	N1b	0	NA	NA	NA	NA	Not Reported	NA	8958f050-5669-5020-9396-e7a4038f9535	NA	NA	67	-24803	1928	2001	2feb4405-5ecb-560c-88fc-ac8f9efa8f41	Dead	not hispanic or latino	female	white	2417	NA	NA	Radiation Therapy, NOS
TCGA-B6-A0WW	Infiltrating duct carcinoma, NOS	not reported	MX	not reported	T2	Stage X	Breast, NOS	No	no	8500/3	C50.9	released	No	not reported	9e8222ae-6c5b-5d76-99df-af644e4656e9	Breast, NOS	NA	NA	stage x	1997	21479	2019-08-08T16:24:46.807013-05:00	NA	not reported	4th	N1b	0	NA	NA	NA	NA	Not Reported	NA	d07bf71a-996b-556b-8d39-3a54e7de7137	NA	NA	58	-21479	1939	1998	5815ab99-6483-5522-8581-740b434a3216	Dead	not hispanic or latino	female	black or african american	558	NA	NA	Radiation Therapy, NOS
TCGA-B6-A0WX	Lobular carcinoma, NOS	not reported	M0	not reported	T3	Stage IIIA	Breast, NOS	No	no	8520/3	C50.9	released	No	not reported	2865127f-4f67-57f6-8411-ce52cac61b34	Breast, NOS	NA	NA	stage iiia	1998	14784	2019-08-08T16:25:16.087760-05:00	NA	not reported	5th	N1b	0	NA	NA	NA	NA	Not Reported	NA	f0fcd7a4-7337-589c-a694-fe2cc4579dc9	NA	NA	40	-14784	1958	1999	1c9c4ff6-e380-5e37-9cee-d2369fcb1e93	Dead	not hispanic or latino	female	black or african american	639	NA	NA	Radiation Therapy, NOS
TCGA-B6-A0WY	Infiltrating duct carcinoma, NOS	not reported	M0	not reported	T3	Stage IIIA	Breast, NOS	No	no	8500/3	C50.9	released	No	not reported	0bfec736-f736-5736-b25b-6fea5243eca3	Breast, NOS	NA	NA	stage iiia	1996	14778	2019-08-08T16:25:16.087760-05:00	NA	not reported	4th	N1b	0	NA	NA	NA	NA	Not Reported	NA	c7311ec2-55ba-5c69-b4c6-1ec5ccc65ab9	NA	NA	40	-14778	1956	2005	405f2d29-c90b-510b-bc41-4e7d07121fd0	Dead	not hispanic or latino	female	white	3461	NA	NA	Radiation Therapy, NOS
TCGA-B6-A0WZ	Infiltrating duct carcinoma, NOS	not reported	M0	not reported	T2	Stage II	Breast, NOS	No	no	8500/3	C50.9	released	No	not reported	bcdad594-cc3a-59c8-9a30-2f5218b72960	Breast, NOS	6292	NA	stage ii	1996	18584	2019-08-08T16:25:16.087760-05:00	NA	not reported	4th	N1b	0	NA	NA	NA	NA	Not Reported	NA	9965f5cc-a110-5232-a5fd-23593dfc8413	NA	NA	50	-18584	1946	NA	2c199b50-4a79-5409-8233-cae7ae80913f	Alive	not hispanic or latino	female	black or african american	NA	NA	NA	Radiation Therapy, NOS
TCGA-B6-A0X4	Infiltrating duct carcinoma, NOS	not reported	M0	not reported	T2	Stage IIB	Breast, NOS	No	no	8500/3	C50.9	released	No	not reported	c8cc0595-036f-5f8f-966f-846259258b1d	Breast, NOS	NA	NA	stage iib	1996	22688	2019-08-08T16:25:16.087760-05:00	NA	not reported	4th	N1b	0	NA	NA	NA	NA	Not Reported	NA	315259b9-002e-57f9-bd7c-10d8284f3488	NA	NA	62	-22688	1934	1998	4de206c3-95a6-505f-8e31-f85668da86d2	Dead	not hispanic or latino	female	white	860	NA	NA	Radiation Therapy, NOS
TCGA-B6-A0X5	Infiltrating duct carcinoma, NOS	not reported	M0	not reported	T2	Stage IIB	Breast, NOS	No	no	8500/3	C50.9	released	No	not reported	9abdebb1-184f-5a19-9fd8-8b821821a9ac	Breast, NOS	NA	NA	stage iib	1995	22380	2019-08-08T16:25:16.087760-05:00	NA	not reported	4th	N1b	0	NA	NA	NA	NA	Not Reported	NA	917a03d6-56f8-5d3d-9cc2-2abd8142187a	NA	NA	61	-22380	1934	2000	da1d3c15-3498-56be-bb51-fa31384e118d	Dead	not hispanic or latino	female	black or african american	2097	NA	NA	Radiation Therapy, NOS
TCGA-B6-A0X7	Infiltrating duct carcinoma, NOS	not reported	MX	not reported	T1c	Stage X	Breast, NOS	No	no	8500/3	C50.9	released	No	not reported	c1b808f5-3a16-5a45-854f-52ad5a35e649	Breast, NOS	NA	NA	stage x	1994	22723	2019-08-08T16:25:16.087760-05:00	NA	not reported	4th	NX	0	NA	NA	NA	NA	Not Reported	NA	9af7f805-2b1c-5d24-bc94-86d0f796a376	NA	NA	62	-22723	1932	1998	b08c1f76-30a5-5a74-acdf-c41e09e72918	Dead	not hispanic or latino	female	white	1781	NA	NA	Radiation Therapy, NOS
TCGA-B6-A1KF	Infiltrating duct carcinoma, NOS	not reported	M0	not reported	T2	Stage IIB	Breast, NOS	No	no	8500/3	C50.9	released	No	not reported	886eae4a-ea85-579c-b1ac-52c55304f502	Breast, NOS	3088	NA	stage iib	1998	24891	2019-08-08T16:25:16.087760-05:00	NA	not reported	5th	N1	0	NA	NA	NA	NA	Not Reported	NA	3275c2d6-e68d-5b59-bbcf-7c3daed9a8c8	NA	NA	68	-24891	1930	NA	da42095a-0643-5e99-9e7e-2d5b6e8e1d8d	Alive	not hispanic or latino	female	white	NA	NA	NA	Radiation Therapy, NOS
TCGA-B6-A1KI	Infiltrating duct carcinoma, NOS	not reported	M0	not reported	T1c	Stage I	Breast, NOS	No	no	8500/3	C50.9	released	No	not reported	449986bb-06f3-56ad-ba88-52761783fbe9	Breast, NOS	2236	NA	stage i	2003	23031	2019-08-08T16:25:16.087760-05:00	NA	not reported	6th	N0	0	NA	NA	NA	NA	Not Reported	NA	8d730039-2838-5995-8802-1b7438108afe	NA	NA	63	-23031	1940	NA	ba6c4b42-85c9-508e-8a14-ca7a55b8952a	Alive	not hispanic or latino	female	white	NA	NA	NA	Radiation Therapy, NOS
TCGA-B6-A1KN	Infiltrating duct carcinoma, NOS	not reported	M0	not reported	T4b	Stage IIIB	Breast, NOS	No	no	8500/3	C50.9	released	No	not reported	b34adc77-edce-51fb-9e80-5ed59043c9d4	Breast, NOS	4233	NA	stage iiib	1998	21183	2019-08-08T16:25:16.087760-05:00	NA	not reported	5th	N1	0	NA	NA	NA	NA	Not Reported	NA	d80ca147-89b2-5919-83e7-e2b99ff1ba32	NA	NA	57	-21183	1941	NA	ee24a49d-207e-5c30-a196-2cd44428f85d	Alive	not hispanic or latino	female	white	NA	NA	NA	Radiation Therapy, NOS
TCGA-B6-A2IU	Lobular carcinoma, NOS	not reported	M0	not reported	T2	Stage IIA	Breast, NOS	No	no	8520/3	C50.9	released	No	not reported	413a4fe1-12b0-55a8-9247-4dfb11c259d8	Breast, NOS	5176	NA	stage iia	1998	22905	2019-08-08T16:25:16.087760-05:00	NA	not reported	5th	N0	0	NA	NA	NA	NA	Not Reported	NA	8dfe59f5-7b2f-5606-b8b9-e814c616237f	NA	NA	62	-22905	1936	NA	313c5f25-c882-59c2-af66-c73d03662e6e	Alive	hispanic or latino	female	white	NA	NA	NA	Radiation Therapy, NOS
TCGA-B6-A3ZX	Infiltrating duct and lobular carcinoma	not reported	M1	not reported	T3	Stage IV	Breast, NOS	No	no	8522/3	C50.9	released	No	not reported	1cc80f4c-de80-56b9-9415-233812f863ca	Breast, NOS	1132	NA	stage iv	2007	18434	2019-08-08T16:25:16.087760-05:00	NA	not reported	6th	N1	0	NA	NA	NA	NA	Not Reported	NA	c5da8cd3-e70a-5ea0-873b-c85151b1c1b9	NA	NA	50	-18434	1957	NA	0f0db1a7-4960-5afc-9a99-7d7f799b712e	Dead	not hispanic or latino	female	black or african american	1152	NA	NA	Radiation Therapy, NOS
TCGA-B6-A400	Infiltrating duct carcinoma, NOS	not reported	M0	not reported	T2	Stage IIIA	Breast, NOS	No	no	8500/3	C50.9	released	No	not reported	69830641-5a08-5ae0-bd97-8cf449babf87	Breast, NOS	215	NA	stage iiia	2008	16022	2019-08-08T16:25:16.087760-05:00	NA	not reported	6th	N2a	0	NA	NA	NA	NA	Not Reported	NA	110fcd7a-1c84-5253-b32a-0b9cbf77636c	NA	NA	43	-16022	1965	NA	af910ab2-d6fd-594b-bc28-f0e5822f80f1	Alive	not hispanic or latino	female	black or african american	NA	NA	NA	Radiation Therapy, NOS
TCGA-B6-A401	Infiltrating duct carcinoma, NOS	not reported	M0	not reported	T1c	Stage IIA	Breast, NOS	No	no	8500/3	C50.9	released	No	not reported	a8ecc57f-8116-54af-a9c2-6b919f2eb052	Breast, NOS	2596	NA	stage iia	2007	17438	2019-08-08T16:25:16.087760-05:00	NA	not reported	6th	N1a	0	NA	NA	NA	NA	Not Reported	NA	3f70c31e-d7f1-58ec-9b1f-aa5ed72eb36d	NA	NA	47	-17438	1960	NA	4ace1836-2ed7-5f33-84f9-9b5149c18118	Alive	not hispanic or latino	female	black or african american	NA	NA	NA	Radiation Therapy, NOS
TCGA-B6-A402	Infiltrating duct carcinoma, NOS	not reported	M0	not reported	T1c	Stage I	Breast, NOS	No	no	8500/3	C50.9	released	No	not reported	235801a2-15e7-542c-b5d2-336e46d1da73	Breast, NOS	2281	NA	stage i	2008	17314	2019-08-08T16:25:16.087760-05:00	NA	not reported	6th	N0 (i-)	0	NA	NA	NA	NA	Not Reported	NA	b2262827-74cf-5980-a338-46cda7ca99b1	NA	NA	47	-17314	1961	NA	d5996ea0-6e87-50dc-a144-c876591ef84b	Alive	not hispanic or latino	female	black or african american	NA	NA	NA	Radiation Therapy, NOS
TCGA-B6-A408	Infiltrating duct and lobular carcinoma	not reported	M0	not reported	T2	Stage IIIC	Breast, NOS	No	no	8522/3	C50.9	released	No	not reported	fa916d60-669b-550d-9e6d-177ef81be865	Breast, NOS	2072	NA	stage iiic	2008	20102	2019-08-08T16:25:16.087760-05:00	NA	not reported	6th	N3a	0	NA	NA	NA	NA	Not Reported	NA	fac9bc80-8f9d-57ee-b88a-ad7fe5816039	NA	NA	55	-20102	1953	NA	bbd5d0ab-1067-55c1-8463-1ddd6352b9c5	Alive	not hispanic or latino	female	black or african american	NA	NA	NA	Radiation Therapy, NOS
TCGA-B6-A409	Infiltrating duct carcinoma, NOS	not reported	M0	not reported	T1c	Stage IIIA	Breast, NOS	No	no	8500/3	C50.9	released	No	not reported	5e50aa40-a4f7-53fd-b369-a85372b37dfe	Breast, NOS	NA	NA	stage iiia	2008	16178	2019-08-08T16:25:16.087760-05:00	NA	not reported	6th	N2a	0	NA	NA	NA	NA	Not Reported	NA	97d2f2c6-3ab7-5fd1-bebc-d7748c10040b	NA	NA	44	-16178	1964	2009	fdce666e-9714-5e91-8f4e-878cac19e9b0	Dead	not hispanic or latino	female	black or african american	573	NA	NA	Radiation Therapy, NOS
TCGA-B6-A40B	Lobular carcinoma, NOS	not reported	M0	not reported	T1b	Stage I	Breast, NOS	No	no	8520/3	C50.9	released	No	not reported	3334f88e-71a4-5fd2-be6e-57db6db7c233	Breast, NOS	3152	NA	stage i	2005	27811	2019-08-08T16:25:16.087760-05:00	NA	not reported	6th	N0 (i-)	0	NA	NA	NA	NA	Not Reported	NA	9ce9c539-9e6c-59ab-814d-cc1c1d51b7b2	NA	NA	76	-27811	1929	NA	44dbbb6e-8b07-5682-954b-b17d7753f1b1	Alive	not hispanic or latino	female	white	NA	NA	NA	Radiation Therapy, NOS
TCGA-B6-A40C	Lobular carcinoma, NOS	not reported	M0	not reported	T3	Stage IIB	Breast, NOS	No	no	8520/3	C50.9	released	No	not reported	208260a3-e4e9-565e-b95e-ba6250c8557c	Breast, NOS	2164	NA	stage iib	2005	18852	2019-08-08T16:25:16.087760-05:00	NA	not reported	6th	N0 (i-)	0	NA	NA	NA	NA	Not Reported	NA	8bc5b0c5-ee3a-5ce5-8000-451ae731d4a4	NA	NA	51	-18852	1954	NA	457b9fc9-e08f-5823-aacc-04b82c2afd45	Alive	not hispanic or latino	female	white	NA	NA	NA	Radiation Therapy, NOS
TCGA-BH-A0AU	Infiltrating duct carcinoma, NOS	not reported	M0	not reported	T2	Stage IIA	Breast, NOS	No	no	8500/3	C50.9	released	No	not reported	ee2b5bc8-ab38-54d7-b864-3217ce45dd3f	Breast, NOS	1914	NA	stage iia	2008	16688	2019-08-08T16:25:16.087760-05:00	NA	not reported	6th	N0	0	NA	NA	NA	NA	Not Reported	NA	e8afd9d6-8aa1-5e45-9c31-375bb37ef716	NA	NA	45	-16688	1963	NA	d7b903df-6ad5-59be-828f-85bbc3fb8f5a	Alive	not hispanic or latino	female	white	NA	NA	NA	Radiation Therapy, NOS
TCGA-BH-A0AW	Infiltrating duct carcinoma, NOS	not reported	M0	not reported	T1c	Stage IIA	Breast, NOS	No	no	8500/3	C50.9	released	No	not reported	d4e3cbbe-279c-5d50-abc2-d306947f407f	Breast, NOS	622	NA	stage iia	2008	20468	2019-08-08T16:25:16.087760-05:00	NA	not reported	NA	N1a	0	NA	NA	NA	NA	Not Reported	NA	93042c26-50ef-5142-8c99-0e1f23e4448e	NA	NA	56	-20468	1952	NA	d38342b7-bc07-5d0a-9393-2f7dcf83703a	Alive	not reported	female	white	NA	NA	NA	Radiation Therapy, NOS
TCGA-BH-A0AY	Infiltrating duct carcinoma, NOS	not reported	M0	not reported	T2	Stage IIA	Breast, NOS	No	no	8500/3	C50.9	released	No	not reported	61771525-d04f-5b8b-9427-b63450d114e1	Breast, NOS	777	NA	stage iia	2008	22703	2019-08-08T16:25:16.087760-05:00	NA	not reported	NA	N0 (i-)	0	NA	NA	NA	NA	Not Reported	NA	22867fa9-82b4-53e7-9bcf-73d7b3aabf9c	NA	NA	62	-22703	1946	NA	3e79957a-f4a7-582b-938d-cf3e2e0d8714	Alive	not reported	female	white	NA	NA	NA	Radiation Therapy, NOS
TCGA-BH-A0AZ	Infiltrating duct carcinoma, NOS	not reported	cM0 (i+)	not reported	T3	Stage IIIA	Breast, NOS	No	no	8500/3	C50.9	released	No	not reported	e088b174-9b35-5459-a412-4be36438bf25	Breast, NOS	1919	NA	stage iiia	2008	17465	2019-08-08T16:25:16.087760-05:00	NA	not reported	6th	N1a	0	NA	NA	NA	NA	Not Reported	NA	e961354c-8b94-540f-8eb0-540a776817d6	NA	NA	47	-17465	1961	NA	2141000c-35a1-5544-bf79-3623c6ca8e66	Alive	not hispanic or latino	female	white	NA	NA	NA	Radiation Therapy, NOS
TCGA-BH-A0B3	Infiltrating duct carcinoma, NOS	not reported	M0	not reported	T2	Stage IIB	Breast, NOS	No	no	8500/3	C50.9	released	No	not reported	7010dad3-66c7-55a8-a998-635323a23807	Breast, NOS	1203	NA	stage iib	2007	19479	2019-08-08T16:25:16.087760-05:00	NA	not reported	NA	N1a	0	NA	NA	NA	NA	Not Reported	NA	8225d7a6-72cc-585f-b097-dec90a40b394	NA	NA	53	-19479	1954	NA	0901ae95-23df-59e4-a986-efdd397724bc	Alive	not reported	female	white	NA	NA	NA	Radiation Therapy, NOS
TCGA-BH-A0B5	Lobular carcinoma, NOS	not reported	M0	not reported	T2	Stage IIIA	Breast, NOS	No	no	8520/3	C50.9	released	No	not reported	90369e00-386e-52b9-9cfa-bb55a0e57bc5	Breast, NOS	2136	NA	stage iiia	2007	14920	2019-08-08T16:25:16.087760-05:00	NA	not reported	6th	N2a	0	NA	NA	NA	NA	Not Reported	NA	5189386e-d80f-55c7-a5ea-f3ed5d25e678	NA	NA	40	-14920	1967	NA	755411cf-6e80-5046-9a81-3803550d1478	Alive	not hispanic or latino	female	white	NA	NA	NA	Radiation Therapy, NOS
TCGA-BH-A0B6	Infiltrating duct carcinoma, NOS	not reported	M0	not reported	T1c	Stage I	Breast, NOS	Yes	yes	8500/3	C50.9	released	Not Reported	not reported	aedb96c5-99f0-5db2-8223-6a71050e9d9a	Breast, NOS	2483	NA	stage i	2006	17346	2019-08-08T16:25:16.087760-05:00	NA	not reported	6th	N0	0	NA	NA	NA	NA	Not Reported	NA	315616b0-45fd-5248-b06f-8ada577c0f25	NA	NA	47	-17346	1959	NA	99b69752-1c5f-52bc-9b23-7c28f87374be	Alive	not hispanic or latino	female	white	NA	NA	NA	Radiation Therapy, NOS
TCGA-BH-A0B8	Infiltrating duct carcinoma, NOS	not reported	M0	not reported	T1b	Stage I	Breast, NOS	No	no	8500/3	C50.9	released	No	not reported	7b2692b8-f4ba-551a-b800-52e265e5a176	Breast, NOS	1569	NA	stage i	2006	23380	2019-08-08T16:25:16.087760-05:00	NA	not reported	NA	N0 (i-)	0	NA	NA	NA	NA	Not Reported	NA	52c23b50-fe45-5265-8faf-6fa401311ae8	NA	NA	64	-23380	1942	NA	e9aa7e5e-b3a4-5b1f-9fae-a3c046be77fa	Alive	not reported	female	white	NA	NA	NA	Radiation Therapy, NOS
TCGA-BH-A0B9	Infiltrating duct carcinoma, NOS	not reported	M0	not reported	T1c	Stage IA	Breast, NOS	No	no	8500/3	C50.9	released	No	not reported	c84ca520-665f-590e-b1c1-739efb93dc4d	Breast, NOS	1572	NA	stage ia	2006	16310	2019-08-08T16:25:16.087760-05:00	NA	not reported	NA	N0 (i-)	0	NA	NA	NA	NA	Not Reported	NA	c563295f-6aa4-5268-8bbf-f9e81f65a979	NA	NA	44	-16310	1962	NA	736e9e4c-178e-5e66-a3f6-4cc7b59004a6	Alive	not reported	female	white	NA	NA	NA	Radiation Therapy, NOS
TCGA-BH-A0BA	Infiltrating duct and lobular carcinoma	not reported	M0	not reported	T3	Stage IIIC	Breast, NOS	No	no	8522/3	C50.9	released	No	not reported	cc6496ea-4e47-5c81-9cd9-a7d25a5b0027	Breast, NOS	1132	NA	stage iiic	2006	18839	2019-08-08T16:25:16.087760-05:00	NA	not reported	NA	N3a	0	NA	NA	NA	NA	Not Reported	NA	e8e2ad8c-4057-505c-bc88-33160815120f	NA	NA	51	-18839	1955	NA	5b2d7624-6fac-513c-a1f6-9a1c27e67222	Alive	not reported	female	white	NA	NA	NA	Radiation Therapy, NOS
TCGA-BH-A0BC	Infiltrating duct carcinoma, NOS	not reported	M0	not reported	T2	Stage IIIC	Breast, NOS	No	no	8500/3	C50.9	released	No	not reported	cc5ea724-b912-5e6a-bbce-fc8fd844f267	Breast, NOS	974	NA	stage iiic	2007	21949	2019-08-08T16:25:16.087760-05:00	NA	not reported	NA	N3	0	NA	NA	NA	NA	Not Reported	NA	68ea79cb-6d78-546f-a4bb-fbd5073b189a	NA	NA	60	-21949	1947	NA	e2d9dc69-f884-5240-a7ed-03e85e877ab9	Alive	not reported	female	white	NA	NA	NA	Radiation Therapy, NOS
TCGA-BH-A0BF	Infiltrating duct carcinoma, NOS	not reported	M0	not reported	T2	Stage IIB	Breast, NOS	No	no	8500/3	C50.9	released	No	not reported	b6689e16-f73a-501c-8598-c39a578ee4bf	Breast, NOS	782	NA	stage iib	2009	20691	2019-08-08T16:25:16.087760-05:00	NA	not reported	6th	N1mi	0	NA	NA	NA	NA	Not Reported	NA	1989b464-8db3-59c9-9e70-5a1565aec830	NA	NA	56	-20691	1953	NA	e5f152fe-5e0a-5c57-b7a2-a0ef4f2734d4	Dead	not hispanic or latino	female	white	1324	NA	NA	Radiation Therapy, NOS
TCGA-BH-A0BJ	Infiltrating duct carcinoma, NOS	not reported	M0	not reported	T2	Stage IIB	Breast, NOS	No	no	8500/3	C50.9	released	No	not reported	63c75078-4e0e-5994-bd34-95d788a68291	Breast, NOS	660	NA	stage iib	2008	15027	2019-08-08T16:25:16.087760-05:00	NA	not reported	NA	N1a	0	NA	NA	NA	NA	Not Reported	NA	3c53cf44-20d9-5c7f-a571-4d8b1fed80ae	NA	NA	41	-15027	1967	NA	0fff60fe-e15e-537f-aed4-b585cc784415	Alive	not reported	female	white	NA	NA	NA	Radiation Therapy, NOS
TCGA-BH-A0BM	Infiltrating duct carcinoma, NOS	not reported	M0	not reported	T2	Stage IIB	Breast, NOS	No	no	8500/3	C50.9	released	No	not reported	456b7bd5-0f58-59a4-af32-070cf6f9a9a6	Breast, NOS	1876	NA	stage iib	2007	20049	2019-08-08T16:25:16.087760-05:00	NA	not reported	6th	N1a	0	NA	NA	NA	NA	Not Reported	NA	16f9b76c-3b89-517a-82ed-b576f15227b7	NA	NA	54	-20049	1953	NA	68d257ca-99e8-5ab9-acd2-1d77cf5ce96c	Alive	not reported	female	white	NA	NA	NA	Radiation Therapy, NOS
TCGA-BH-A0BS	Infiltrating duct carcinoma, NOS	not reported	M0	not reported	T3	Stage IIIA	Breast, NOS	No	no	8500/3	C50.9	released	No	not reported	1733e8ee-a96b-5aad-bd3c-4375edf35f99	Breast, NOS	2612	NA	stage iiia	2007	20374	2019-08-08T16:25:16.087760-05:00	NA	not reported	6th	N1c	0	NA	NA	NA	NA	Not Reported	NA	e4ade5c4-fbda-5164-8184-cc96bd6e351b	NA	NA	55	-20374	1952	NA	7b24587e-3438-5920-98af-ca56897fc1c9	Alive	not hispanic or latino	female	white	NA	NA	NA	Radiation Therapy, NOS
TCGA-BH-A0BT	Infiltrating duct carcinoma, NOS	not reported	M0	not reported	T1c	Stage IIA	Breast, NOS	No	no	8500/3	C50.9	released	No	not reported	2c8bafef-5814-5186-8a7f-698389cfc479	Breast, NOS	2365	NA	stage iia	2007	20625	2019-08-08T16:25:16.087760-05:00	NA	not reported	6th	N1mi	0	NA	NA	NA	NA	Not Reported	NA	bd3f9c81-edf5-5a34-ad77-d48cb12ce846	NA	NA	56	-20625	1951	NA	748d254e-f8c6-5e92-9738-c8d0b11c3731	Alive	not hispanic or latino	female	white	NA	NA	NA	Radiation Therapy, NOS
TCGA-BH-A0BV	Infiltrating duct carcinoma, NOS	not reported	M0	not reported	T2	Stage IIB	Breast, NOS	No	no	8500/3	C50.9	released	No	not reported	cab34593-55fc-55b7-ae2c-c96190706ede	Breast, NOS	1519	NA	stage iib	2006	28699	2019-08-08T16:25:16.087760-05:00	NA	not reported	NA	N1a	0	NA	NA	NA	NA	Not Reported	NA	3339b4a5-51d0-5c6e-8129-820d293c2020	NA	NA	78	-28699	1928	NA	807bd45e-d010-5e34-a3fc-c53dbc99fa45	Alive	not reported	female	white	NA	NA	NA	Radiation Therapy, NOS
TCGA-BH-A0BZ	Infiltrating duct carcinoma, NOS	not reported	M0	not reported	T3	Stage IIIA	Breast, NOS	No	no	8500/3	C50.9	released	No	not reported	95927fcf-d840-565d-a15f-53091a437aa8	Breast, NOS	2255	NA	stage iiia	2007	21856	2019-08-08T16:25:42.215495-05:00	NA	not reported	6th	N1a	0	NA	NA	NA	NA	Not Reported	NA	81ed3a3e-65c8-5ce5-b4ee-e0ca57135aae	NA	NA	59	-21856	1948	NA	9b72ebd1-f3f4-5723-9000-bcb77e3fba6e	Alive	not hispanic or latino	female	white	NA	NA	NA	Radiation Therapy, NOS
TCGA-BH-A0C0	Infiltrating duct carcinoma, NOS	not reported	M0	not reported	T1c	Stage IIA	Breast, NOS	No	no	8500/3	C50.9	released	No	not reported	e32bb0cb-4bf9-5070-bb12-2062d182bae3	Breast, NOS	1270	NA	stage iia	2007	23006	2019-08-08T16:25:42.215495-05:00	NA	not reported	NA	N1a	0	NA	NA	NA	NA	Not Reported	NA	59e40509-5823-5aa4-a7b0-622f177f3862	NA	NA	62	-23006	1945	NA	a0d33347-9901-5a63-8784-40303e43c74c	Alive	not reported	female	white	NA	NA	NA	Radiation Therapy, NOS
TCGA-BH-A0C3	Infiltrating duct and lobular carcinoma	not reported	M0	not reported	T1c	Stage I	Breast, NOS	No	no	8522/3	C50.9	released	No	not reported	6929c1cc-33fb-593b-a155-bb1d80459480	Breast, NOS	2709	NA	stage i	2006	17221	2019-08-08T16:25:42.215495-05:00	NA	not reported	6th	N0	0	NA	NA	NA	NA	Not Reported	NA	4d65cf39-bb55-54d5-beca-1c27e3df419a	NA	NA	47	-17221	1959	NA	f702bc6a-c082-52de-b42c-e5c0d277118e	Alive	not reported	female	white	NA	NA	NA	Radiation Therapy, NOS
TCGA-BH-A0DG	Infiltrating duct carcinoma, NOS	not reported	M0	not reported	T2	Stage IIA	Breast, NOS	No	no	8500/3	C50.9	released	No	not reported	72b9aecf-0848-5e03-b4a8-1092a2714137	Breast, NOS	2041	NA	stage iia	2007	11204	2019-08-08T16:25:42.215495-05:00	NA	not reported	6th	N0	0	NA	NA	NA	NA	Not Reported	NA	736a6346-23e1-55fa-aedc-94c0d162ed71	NA	NA	30	-11204	1977	NA	9f2e430b-d6bb-5154-9ede-2ae3442f7fd8	Alive	not hispanic or latino	female	black or african american	NA	NA	NA	Radiation Therapy, NOS
TCGA-BH-A0DH	Infiltrating duct carcinoma, NOS	not reported	M0	not reported	T2	Stage IIB	Breast, NOS	No	no	8500/3	C50.9	released	No	not reported	7b9f41ce-92e9-5d15-81ee-8505cbd0739c	Breast, NOS	1156	NA	stage iib	2007	23366	2019-08-08T16:25:42.215495-05:00	NA	not reported	NA	N1a	0	NA	NA	NA	NA	Not Reported	NA	1648051e-fa74-5bfb-98bc-34aa1cd22958	NA	NA	63	-23366	1944	NA	466ba23f-edcb-599b-8113-2c21597d762b	Alive	not reported	female	white	NA	NA	NA	Radiation Therapy, NOS
TCGA-BH-A0DI	Infiltrating duct carcinoma, NOS	not reported	M0	not reported	T2	Stage IIB	Breast, NOS	No	no	8500/3	C50.9	released	No	not reported	17120920-a9aa-5655-95f3-6715ae148bb1	Breast, NOS	912	NA	stage iib	2009	23327	2019-08-08T16:25:42.215495-05:00	NA	not reported	6th	N1a	0	NA	NA	NA	NA	Not Reported	NA	d89bd01b-b332-5b00-945e-1d3c583b59c7	NA	NA	63	-23327	1946	NA	7910fa56-3f90-5a57-bb55-e450ac1a3813	Alive	not hispanic or latino	female	white	NA	NA	NA	Radiation Therapy, NOS
TCGA-BH-A0DK	Infiltrating duct carcinoma, NOS	not reported	M0	not reported	T2	Stage IIA	Breast, NOS	No	no	8500/3	C50.9	released	No	not reported	1d660016-9860-5ed7-a8ef-c628cb40b16a	Breast, NOS	423	NA	stage iia	2009	18237	2019-08-08T16:25:42.215495-05:00	NA	not reported	NA	N0 (i-)	0	NA	NA	NA	NA	Not Reported	NA	410e0109-8bb9-5e07-b2e6-5a7db888bcf7	NA	NA	49	-18237	1960	NA	66370c05-2b26-5840-9586-b553250c87c2	Alive	not reported	female	white	NA	NA	NA	Radiation Therapy, NOS
TCGA-BH-A0DP	Lobular carcinoma, NOS	not reported	M0	not reported	T3	Stage IIB	Breast, NOS	No	no	8520/3	C50.9	released	No	not reported	5c4e94ad-b8fe-5cad-a29f-6bd0ab265b71	Breast, NOS	476	NA	stage iib	2009	22199	2019-08-08T16:25:42.215495-05:00	NA	not reported	NA	N0 (i-)	0	NA	NA	NA	NA	Not Reported	NA	a0206bf9-ad0e-54c8-bb8b-4a27227fad71	NA	NA	60	-22199	1949	NA	613d7289-fe6b-518d-a970-69ce3ecf1871	Alive	not reported	female	white	NA	NA	NA	Radiation Therapy, NOS
TCGA-BH-A0DQ	Infiltrating duct carcinoma, NOS	not reported	M0	not reported	T2	Stage IIB	Breast, NOS	No	no	8500/3	C50.9	released	No	not reported	3c19edfc-579f-5091-8fab-5ffd0ab13625	Breast, NOS	98	NA	stage iib	2009	15533	2019-08-08T16:25:42.215495-05:00	NA	not reported	NA	N1	0	NA	NA	NA	NA	Not Reported	NA	3696c028-13b8-56a4-822a-b3dbae23cdfc	NA	NA	42	-15533	1967	NA	1d62706b-b506-5af5-b275-07125cb3ca13	Alive	not reported	female	white	NA	NA	NA	Radiation Therapy, NOS
TCGA-BH-A0DS	Infiltrating duct carcinoma, NOS	not reported	M0	not reported	T2	Stage IIIA	Breast, NOS	No	no	8500/3	C50.9	released	No	not reported	217788fc-5aff-59f7-9a38-cbb48d7e6a35	Breast, NOS	78	NA	stage iiia	2010	25944	2019-08-08T16:25:42.215495-05:00	NA	not reported	7th	N2a	0	NA	NA	NA	NA	Not Reported	NA	4f175630-ed81-5e38-b088-811ee5f09c07	NA	NA	71	-25944	1939	NA	b497172f-a134-5155-a3a2-24c73ce90cb4	Alive	not reported	female	white	NA	NA	NA	Radiation Therapy, NOS
TCGA-BH-A0DV	Infiltrating duct carcinoma, NOS	not reported	M0	not reported	T2	Stage IIIA	Breast, NOS	No	no	8500/3	C50.9	released	No	not reported	70d52b69-d85f-52f1-bf57-619c729cbdd7	Breast, NOS	2064	NA	stage iiia	2007	19781	2019-08-08T16:25:42.215495-05:00	NA	not reported	6th	N2a	0	NA	NA	NA	NA	Not Reported	NA	c7189d9e-cee1-520b-b4da-cf5638552326	NA	NA	54	-19781	1953	NA	de445450-59ab-5234-a46d-ee4468dddbe4	Alive	not reported	female	white	NA	NA	NA	Radiation Therapy, NOS
TCGA-BH-A0DZ	Infiltrating duct carcinoma, NOS	not reported	M0	not reported	T2	Stage IIB	Breast, NOS	No	no	8500/3	C50.9	released	No	not reported	6bad7565-3ccb-580d-bf14-d4420d2e5780	Breast, NOS	495	NA	stage iib	2009	15980	2019-08-08T16:25:42.215495-05:00	NA	not reported	NA	N1a	0	NA	NA	NA	NA	Not Reported	NA	b732bb5e-5439-5819-898a-0abb707914dc	NA	NA	43	-15980	1966	NA	9456760c-e151-5ee7-b9fa-c174fc4ad079	Alive	not reported	female	white	NA	NA	NA	Radiation Therapy, NOS
TCGA-BH-A0E0	Infiltrating duct carcinoma, NOS	not reported	M0	not reported	T3	Stage IIIC	Breast, NOS	No	no	8500/3	C50.9	released	No	not reported	542461a4-9582-5ed1-865c-38019eab6836	Breast, NOS	134	NA	stage iiic	2009	14175	2019-08-08T16:25:42.215495-05:00	NA	not reported	NA	N3a	0	NA	NA	NA	NA	Not Reported	NA	2635b94b-0296-5d83-84e2-42460556ffff	NA	NA	38	-14175	1971	NA	ce698ace-6f48-5272-90f0-989d7d3dff80	Alive	not reported	female	white	NA	NA	NA	Radiation Therapy, NOS
TCGA-BH-A0E1	Infiltrating duct carcinoma, NOS	not reported	M0	not reported	T2	Stage IIB	Breast, NOS	No	no	8500/3	C50.9	released	No	not reported	812fbfaf-47c1-58d3-865d-248c253e373e	Breast, NOS	477	NA	stage iib	2009	19192	2019-08-08T16:25:42.215495-05:00	NA	not reported	NA	N1	0	NA	NA	NA	NA	Not Reported	NA	1d844394-425f-59fa-b88c-c2aba3d43da4	NA	NA	52	-19192	1957	NA	7c593975-bc80-5c2b-8923-f0ab61dec4dc	Alive	not reported	female	white	NA	NA	NA	Radiation Therapy, NOS
TCGA-BH-A0E2	Infiltrating duct carcinoma, NOS	not reported	M0	not reported	T2	Stage IIIA	Breast, NOS	No	no	8500/3	C50.9	released	No	not reported	710cd2f9-ca07-5774-9a76-23a3508b693c	Breast, NOS	435	NA	stage iiia	2009	18152	2019-08-08T16:25:42.215495-05:00	NA	not reported	NA	N2a	0	NA	NA	NA	NA	Not Reported	NA	310c21bd-6f35-5f35-957b-7fda8e285f97	NA	NA	49	-18152	1960	NA	39a27c37-e0a6-52c1-94a7-97ebd87412b5	Alive	not reported	female	black or african american	NA	NA	NA	Radiation Therapy, NOS
TCGA-BH-A0GY	Infiltrating duct carcinoma, NOS	not reported	M0	not reported	T2	Stage IIA	Breast, NOS	No	no	8500/3	C50.9	released	No	not reported	afea15a5-109a-5943-a7f0-5c46550636fb	Breast, NOS	923	NA	stage iia	2008	24493	2019-08-08T16:25:42.215495-05:00	NA	not reported	NA	N1	0	NA	NA	NA	NA	Not Reported	NA	dd626132-df75-5f5a-a2f0-5fdb5da8db05	NA	NA	67	-24493	1941	NA	58c2af88-7ebb-59a8-9676-bc5331bf7e77	Alive	not reported	female	white	NA	NA	NA	Radiation Therapy, NOS
TCGA-BH-A0GZ	Infiltrating duct carcinoma, NOS	not reported	M0	not reported	T1c	Stage IIA	Breast, NOS	No	no	8500/3	C50.9	released	No	not reported	22c0c31d-4b98-555e-9d22-8c75ab1b0b5e	Breast, NOS	328	NA	stage iia	2009	22714	2019-08-08T16:25:42.215495-05:00	NA	not reported	NA	N1a	0	NA	NA	NA	NA	Not Reported	NA	a82f52e2-6a12-5ac6-9248-03fa13b5a6ec	NA	NA	62	-22714	1947	NA	1aa97a16-a47a-59a9-a313-2af0dbfbcaff	Alive	not reported	female	white	NA	NA	NA	Radiation Therapy, NOS
TCGA-BH-A0H0	Infiltrating duct carcinoma, NOS	not reported	M0	not reported	T1c	Stage IA	Breast, NOS	No	no	8500/3	C50.9	released	No	not reported	67934f15-276f-5631-ab46-5dde9f5e6039	Breast, NOS	461	NA	stage ia	2009	25223	2019-08-08T16:25:42.215495-05:00	NA	not reported	NA	N0 (i-)	0	NA	NA	NA	NA	Not Reported	NA	a2bc272a-e1a5-5882-9200-303151619356	NA	NA	69	-25223	1940	NA	c03d6396-8689-5bb1-9579-59a42cf681d9	Alive	not reported	female	white	NA	NA	NA	Radiation Therapy, NOS
TCGA-BH-A0H3	Infiltrating duct carcinoma, NOS	not reported	M0	not reported	T1c	Stage I	Breast, NOS	No	no	8500/3	C50.9	released	No	not reported	8998da97-cee9-53ad-86c4-1a0d1fbe60a9	Breast, NOS	1928	NA	stage i	2008	17152	2019-08-08T16:25:42.215495-05:00	NA	not reported	6th	N0	0	NA	NA	NA	NA	Not Reported	NA	7cab4221-c161-5e92-99b8-5ff9e67a02a6	NA	NA	46	-17152	1962	NA	e6a452b2-7641-557c-a635-40cbfb6b3a49	Alive	not hispanic or latino	female	white	NA	NA	NA	Radiation Therapy, NOS
TCGA-BH-A0H6	Infiltrating duct carcinoma, NOS	not reported	M0	not reported	T1b	Stage I	Breast, NOS	No	no	8500/3	C50.9	released	No	not reported	8bc21167-2003-5371-af51-1033283979aa	Breast, NOS	747	NA	stage i	2008	30125	2019-08-08T16:25:42.215495-05:00	NA	not reported	NA	NX	0	NA	NA	NA	NA	Not Reported	NA	f777d3d8-8a84-5fcb-918d-9de0711c912f	NA	NA	82	-30125	1926	NA	375d23f8-3845-59cd-a050-995f13ca33e4	Alive	not reported	female	white	NA	NA	NA	Radiation Therapy, NOS
TCGA-BH-A0H7	Infiltrating duct carcinoma, NOS	not reported	M0	not reported	T1c	Stage IIIA	Breast, NOS	No	no	8500/3	C50.9	released	No	not reported	46781cc5-c605-51c1-9344-94d7bc12c458	Breast, NOS	702	NA	stage iiia	2008	23972	2019-08-08T16:25:42.215495-05:00	NA	not reported	NA	N2a	0	NA	NA	NA	NA	Not Reported	NA	e2b7e603-9d0b-5a18-9dc0-533a0731304d	NA	NA	65	-23972	1943	NA	d26a3206-f03c-5f04-9d9e-5c85f4e2344c	Alive	not reported	female	white	NA	NA	NA	Radiation Therapy, NOS
TCGA-BH-A0H9	Infiltrating duct carcinoma, NOS	not reported	M0	not reported	T2	Stage IIA	Breast, NOS	No	no	8500/3	C50.9	released	No	not reported	06e52562-2ec1-5b5d-aedf-36556324d026	Breast, NOS	1247	NA	stage iia	2007	25289	2019-08-08T16:25:42.215495-05:00	NA	not reported	NA	N0 (i-)	0	NA	NA	NA	NA	Not Reported	NA	446a58ea-af08-5010-80cf-292af51aec83	NA	NA	69	-25289	1938	NA	7e328baa-bf8b-557d-95fb-ca78e806b20a	Alive	not reported	female	white	NA	NA	NA	Radiation Therapy, NOS
TCGA-BH-A0HA	Infiltrating duct carcinoma, NOS	not reported	M0	not reported	T1c	Stage I	Breast, NOS	No	no	8500/3	C50.9	released	No	not reported	e244e935-decc-5d09-a943-7bd57ffb4911	Breast, NOS	1611	NA	stage i	2008	11379	2019-08-08T16:25:42.215495-05:00	NA	not reported	6th	N0 (i-)	0	NA	NA	NA	NA	Not Reported	NA	8d488a30-419d-579f-875d-97adfa88b438	NA	NA	31	-11379	1977	NA	6ffa8398-4025-5b44-ba4d-08d736d56842	Alive	not hispanic or latino	female	white	NA	NA	NA	Radiation Therapy, NOS
TCGA-BH-A0HB	Infiltrating duct carcinoma, NOS	not reported	M0	not reported	T1c	Stage IA	Breast, NOS	No	no	8500/3	C50.9	released	No	not reported	4ce678c7-08f0-55c9-bc55-817d8d6f8401	Breast, NOS	806	NA	stage ia	2008	20448	2019-08-08T16:25:42.215495-05:00	NA	not reported	NA	N0 (i-)	0	NA	NA	NA	NA	Not Reported	NA	e95ab5fa-4a27-5810-9c16-192b0d6ded68	NA	NA	55	-20448	1953	NA	98cc2ffa-caa1-5327-80e7-d67a004e7a73	Alive	not reported	female	white	NA	NA	NA	Radiation Therapy, NOS
TCGA-BH-A0HF	Infiltrating duct carcinoma, NOS	not reported	M0	not reported	T1c	Stage IA	Breast, NOS	No	no	8500/3	C50.9	released	No	not reported	14047651-e3d9-5a6a-b989-19b0548d8193	Breast, NOS	727	NA	stage ia	2008	28233	2019-08-08T16:25:42.215495-05:00	NA	not reported	NA	N0 (i-)	0	NA	NA	NA	NA	Not Reported	NA	5b4ae203-d940-5581-a358-d1c28757dd2e	NA	NA	77	-28233	1931	NA	0998f15e-63c1-52ed-88c4-6df5a1a58cd3	Alive	not reported	female	white	NA	NA	NA	Radiation Therapy, NOS
TCGA-BH-A0HI	Infiltrating duct carcinoma, NOS	not reported	M0	not reported	T1c	Stage IA	Breast, NOS	No	no	8500/3	C50.9	released	No	not reported	432339da-781b-5e38-9bfc-b8ee0b65bb2b	Breast, NOS	620	NA	stage ia	2008	28644	2019-08-08T16:25:42.215495-05:00	NA	not reported	NA	N0 (i-)	0	NA	NA	NA	NA	Not Reported	NA	4affd117-415e-5ac2-bb84-9a79b5459886	NA	NA	78	-28644	1930	NA	ee536b08-5db8-5ece-87d2-6f8ec242e7a2	Alive	not reported	female	white	NA	NA	NA	Radiation Therapy, NOS
TCGA-BH-A0HK	Infiltrating duct carcinoma, NOS	not reported	M0	not reported	T2	Stage IIB	Breast, NOS	No	no	8500/3	C50.9	released	No	not reported	ce9333cf-6e27-5998-9765-b6cff86a2ece	Breast, NOS	178	NA	stage iib	2010	29751	2019-08-08T16:25:42.215495-05:00	NA	not reported	NA	N1	0	NA	NA	NA	NA	Not Reported	NA	7be2d9aa-e037-52b7-af09-76cfa40eb5fc	NA	NA	81	-29751	1929	NA	617e967f-a9ef-58af-aa77-a005618ce857	Alive	not reported	female	white	NA	NA	NA	Radiation Therapy, NOS
TCGA-BH-A0HN	Infiltrating duct carcinoma, NOS	not reported	M0	not reported	T1c	Stage IA	Breast, NOS	No	no	8500/3	C50.9	released	No	not reported	9530a838-3124-5479-8b41-e71794eaf739	Breast, NOS	516	NA	stage ia	2009	24731	2019-08-08T16:25:42.215495-05:00	NA	not reported	NA	N0 (i-)	0	NA	NA	NA	NA	Not Reported	NA	e7e56489-9b9e-537c-80fd-1e3d4c3cceec	NA	NA	67	-24731	1942	NA	08586dd2-b678-5a16-a126-53f7d8013779	Alive	not reported	female	white	NA	NA	NA	Radiation Therapy, NOS
TCGA-BH-A0HP	Lobular carcinoma, NOS	not reported	M0	not reported	T3	Stage IIIA	Breast, NOS	No	no	8520/3	C50.9	released	No	not reported	7279136c-1a5b-58be-8e63-082f6aa896c0	Breast, NOS	414	NA	stage iiia	2009	23883	2019-08-08T16:25:42.215495-05:00	NA	not reported	NA	N2a	0	NA	NA	NA	NA	Not Reported	NA	ff54c3e3-6deb-5f2c-90e9-0d4da48cda54	NA	NA	65	-23883	1944	NA	48960dca-6bd5-5394-8d74-f8fd9dbdf045	Alive	not reported	female	white	NA	NA	NA	Radiation Therapy, NOS
TCGA-BH-A0HX	Infiltrating duct carcinoma, NOS	not reported	M0	not reported	T2	Stage IIB	Breast, NOS	No	no	8500/3	C50.9	released	No	not reported	fa80d2d2-54ba-5b10-9268-673345b1e362	Breast, NOS	829	NA	stage iib	2008	19900	2019-08-08T16:26:10.413151-05:00	NA	not reported	NA	N1a	0	NA	NA	NA	NA	Not Reported	NA	d8f3a741-5281-587b-8db3-d10861fab5ac	NA	NA	54	-19900	1954	NA	16f1c3fd-be46-5087-a330-c1cde70ffe36	Alive	not reported	female	white	NA	NA	NA	Radiation Therapy, NOS
TCGA-BH-A0HY	Infiltrating duct carcinoma, NOS	not reported	M0	not reported	T1c	Stage I	Breast, NOS	No	no	8500/3	C50.9	released	No	not reported	ed7dec60-bf9a-5987-bbf5-e9fd8a608bd7	Breast, NOS	1545	NA	stage i	2009	22179	2019-08-08T16:26:10.413151-05:00	NA	not reported	6th	N0	0	NA	NA	NA	NA	Not Reported	NA	d7d8de40-32f4-517f-9f35-71a414e77f47	NA	NA	60	-22179	1949	NA	158a9f60-f853-500e-b5d5-8c01c0c9bb50	Alive	not hispanic or latino	female	white	NA	NA	NA	Radiation Therapy, NOS
TCGA-BH-A0RX	Infiltrating duct carcinoma, NOS	not reported	M0	not reported	T2	Stage IIA	Breast, NOS	No	no	8500/3	C50.9	released	No	not reported	891cab00-5919-566f-a2c9-9d0a8bfd031b	Breast, NOS	170	NA	stage iia	2010	21857	2019-08-08T16:26:10.413151-05:00	NA	not reported	NA	N0 (i-)	0	NA	NA	NA	NA	Not Reported	NA	6385fdec-4e27-5b11-a2fe-3a9f2c8d3e57	NA	NA	59	-21857	1951	NA	3bfe1ea8-551b-5bc5-ab35-2376d88a4db5	Alive	not reported	female	white	NA	NA	NA	Radiation Therapy, NOS
TCGA-BH-A0W3	Infiltrating duct carcinoma, NOS	not reported	M0	not reported	T1c	Stage IIA	Breast, NOS	No	no	8500/3	C50.9	released	No	not reported	f16789e6-6ae2-5409-abf2-db06652d5ca0	Breast, NOS	728	NA	stage iia	2010	21369	2019-08-08T16:26:10.413151-05:00	NA	not reported	7th	N1a	0	NA	NA	NA	NA	Not Reported	NA	39491cea-7bc1-5d21-b61c-7b1119dbe77c	NA	NA	58	-21369	1952	NA	cab4193f-91d4-5a37-b9c0-a2af51c64274	Alive	not hispanic or latino	female	white	NA	NA	NA	Radiation Therapy, NOS
TCGA-BH-A0W4	Infiltrating duct carcinoma, NOS	not reported	M0	not reported	T2	Stage IIA	Breast, NOS	No	no	8500/3	C50.9	released	No	not reported	137d89a7-55f4-5cff-bf41-85dbdcc4e384	Breast, NOS	759	NA	stage iia	2010	16911	2019-08-08T16:26:10.413151-05:00	NA	not reported	7th	N0 (i-)	0	NA	NA	NA	NA	Not Reported	NA	405255ed-dcf3-55cc-9e31-793d8bb9afbb	NA	NA	46	-16911	1964	NA	6d3642e0-2d36-5375-bc11-f2089415f7d5	Alive	not hispanic or latino	female	white	NA	NA	NA	Radiation Therapy, NOS
TCGA-BH-A0W5	Infiltrating duct carcinoma, NOS	not reported	M0	not reported	T1c	Stage IIA	Breast, NOS	No	no	8500/3	C50.9	released	No	not reported	3696864a-3731-597f-ba24-763c18fd03ae	Breast, NOS	1288	NA	stage iia	2008	28304	2019-08-08T16:26:10.413151-05:00	NA	not reported	6th	N1a	0	NA	NA	NA	NA	Not Reported	NA	21b6c84c-7052-54d5-a410-df69f9de98b5	NA	NA	77	-28304	1931	NA	b253b885-42f9-5804-9e3b-2a51bc64956b	Alive	not hispanic or latino	female	white	NA	NA	NA	Radiation Therapy, NOS
TCGA-BH-A0WA	Metaplastic carcinoma, NOS	not reported	M0	not reported	T1c	Stage I	Breast, NOS	No	no	8575/3	C50.9	released	No	not reported	fd41ba4b-6da4-5e09-b21e-81f059716c99	Breast, NOS	701	NA	stage i	2008	30025	2019-08-08T16:26:10.413151-05:00	NA	not reported	6th	N0 (i-)	0	NA	NA	NA	NA	Not Reported	NA	f4f59ed0-70ec-5b71-842e-3c7f2da502b2	NA	NA	82	-30025	1926	NA	1b0af59a-4140-5052-a054-24929b80091d	Alive	not hispanic or latino	female	white	NA	NA	NA	Radiation Therapy, NOS
TCGA-BH-A1EN	Infiltrating duct carcinoma, NOS	not reported	M0	not reported	T2	Stage IIA	Breast, NOS	No	no	8500/3	C50.9	released	No	not reported	a11d8828-9092-5172-873d-7941e6db25ed	Breast, NOS	NA	NA	stage iia	1999	28724	2019-08-08T16:26:10.413151-05:00	NA	not reported	5th	NX	0	NA	NA	NA	NA	Not Reported	NA	ccdb7a4d-93e8-5c4c-94b2-8d250b6192a0	NA	NA	78	-28724	1921	2004	a7ecb559-ed27-515f-bfe2-5dc8bb1e755b	Dead	not hispanic or latino	female	white	2127	NA	NA	Radiation Therapy, NOS
TCGA-BH-A1EO	Infiltrating duct and lobular carcinoma	not reported	M0	not reported	T1c	Stage IIA	Breast, NOS	No	no	8522/3	C50.9	released	No	not reported	a0253719-0651-5d59-a91e-9bd98889f6ee	Breast, NOS	NA	NA	stage iia	1999	25136	2019-08-08T16:26:10.413151-05:00	NA	not reported	5th	N1	0	NA	NA	NA	NA	Not Reported	NA	83e201ed-2d59-5dd3-9231-8eeeca1345b6	NA	NA	68	-25136	1931	2006	36e1901f-0fa5-5fb4-abb1-694bfb96cea6	Dead	not hispanic or latino	female	white	2798	NA	NA	Radiation Therapy, NOS
TCGA-BH-A1ET	Infiltrating duct carcinoma, NOS	not reported	M0	not reported	T1	Stage I	Breast, NOS	No	no	8500/3	C50.9	released	No	not reported	1bdc1a36-c315-5279-8747-537c5b0a63c3	Breast, NOS	NA	NA	stage i	1999	20425	2019-08-08T16:26:10.413151-05:00	NA	not reported	5th	N0	0	NA	NA	NA	NA	Not Reported	NA	e72e6b02-58be-539a-af7f-f2714f14899a	NA	NA	55	-20425	1944	2005	8faa57d4-1199-53ce-a0ce-24d358841153	Dead	not hispanic or latino	female	white	2520	NA	NA	Radiation Therapy, NOS
TCGA-BH-A1EU	Infiltrating duct carcinoma, NOS	not reported	M0	not reported	T1	Stage I	Breast, NOS	No	no	8500/3	C50.9	released	No	not reported	728ce1a9-2d29-5f30-a341-35dbb2da52c5	Breast, NOS	NA	NA	stage i	1999	30339	2019-08-08T16:26:10.413151-05:00	NA	not reported	5th	N0	0	NA	NA	NA	NA	Not Reported	NA	c02c0323-7222-5722-a534-75ae71ae0bab	NA	NA	83	-30339	1916	2002	6488e550-f540-5674-a771-fa6764a76cca	Dead	not hispanic or latino	female	white	1286	NA	NA	Radiation Therapy, NOS
TCGA-BH-A1EV	Infiltrating duct carcinoma, NOS	not reported	M0	not reported	T3	Stage IIIA	Breast, NOS	No	no	8500/3	C50.9	released	No	not reported	fc710170-c417-5525-9a45-70c60ed9f5ca	Breast, NOS	NA	NA	stage iiia	1999	16504	2019-08-08T16:26:10.413151-05:00	NA	not reported	5th	N1b	0	NA	NA	NA	NA	Not Reported	NA	90432954-0c8a-55a3-9768-6df159b262bf	NA	NA	45	-16504	1954	2000	01c374ae-9556-57e8-84cc-6cb8b501f31c	Dead	not hispanic or latino	female	white	365	NA	NA	Radiation Therapy, NOS
TCGA-BH-A1EW	Infiltrating duct carcinoma, NOS	not reported	M0	not reported	T2	Stage IIA	Breast, NOS	No	no	8500/3	C50.9	released	No	not reported	b9eef91b-2458-5caa-9e6c-11cf41a363c7	Breast, NOS	NA	NA	stage iia	1999	14090	2019-08-08T16:26:10.413151-05:00	NA	not reported	5th	N1b	0	NA	NA	NA	NA	Not Reported	NA	7475e1bb-59e9-5aa7-bc05-1596c21d1498	NA	NA	38	-14090	1961	2003	6b1509e2-06cf-502b-a881-bc65a3cc9d79	Dead	not hispanic or latino	female	white	1694	NA	NA	Radiation Therapy, NOS
TCGA-BH-A1EX	Infiltrating duct carcinoma, NOS	not reported	M0	not reported	T2	Stage IIB	Breast, NOS	No	no	8500/3	C50.9	released	No	not reported	a4efd4cf-5f48-5763-b967-90ec07912682	Breast, NOS	NA	NA	stage iib	2000	24544	2019-08-08T16:26:10.413151-05:00	NA	not reported	5th	N1b	0	NA	NA	NA	NA	Not Reported	NA	ac664af2-6ab4-5b57-a6e8-ad612ccedff4	NA	NA	67	-24544	1933	2004	2b3701ad-5716-579c-82bd-829c51273bba	Dead	not hispanic or latino	female	white	1508	NA	NA	Radiation Therapy, NOS
TCGA-BH-A1EY	Infiltrating duct carcinoma, NOS	not reported	M0	not reported	T2	Stage IIA	Breast, NOS	No	no	8500/3	C50.9	released	No	not reported	edabb127-0721-523d-be86-21587a5a5c5f	Breast, NOS	NA	NA	stage iia	2000	28940	2019-08-08T16:26:10.413151-05:00	NA	not reported	5th	N0	0	NA	NA	NA	NA	Not Reported	NA	79b72e76-9b90-5265-a29e-b4675cb6f820	NA	NA	79	-28940	1921	2001	834bd331-0584-573b-bc68-14b56004140f	Dead	not hispanic or latino	female	white	538	NA	NA	Radiation Therapy, NOS
TCGA-BH-A1F0	Infiltrating duct carcinoma, NOS	not reported	M0	not reported	T1a	Stage IIA	Breast, NOS	No	no	8500/3	C50.9	released	No	not reported	e28a41f0-17e0-5ee3-af9b-f4b8dc1f48ea	Breast, NOS	NA	NA	stage iia	2000	29335	2019-08-08T16:26:10.413151-05:00	NA	not reported	5th	N1c	0	NA	NA	NA	NA	Not Reported	NA	deecceb3-6e78-5d8c-80cc-6cff321b2668	NA	NA	80	-29335	1920	2002	f6713932-0e52-5260-8b7e-7a6893632830	Dead	not hispanic or latino	female	white	785	NA	NA	Radiation Therapy, NOS
TCGA-BH-A1F2	Paget disease and infiltrating duct carcinoma of breast	not reported	M0	not reported	T4b	Stage IIIB	Breast, NOS	No	no	8541/3	C50.9	released	No	not reported	92d8aecd-b220-5e2b-bae0-30857b24a231	Breast, NOS	NA	NA	stage iiib	1999	19701	2019-08-08T16:26:10.413151-05:00	NA	not reported	5th	N1b	0	NA	NA	NA	NA	Not Reported	NA	cf6833af-0ca7-5da0-be4a-2500fd7a8872	NA	NA	53	-19701	1946	2001	7be4c200-1a36-5e88-921b-f9b2c8269887	Dead	not hispanic or latino	female	white	959	NA	NA	Radiation Therapy, NOS
TCGA-BH-A1F5	Infiltrating duct carcinoma, NOS	not reported	M0	not reported	T1c	Stage IIA	Breast, NOS	No	yes	8500/3	C50.9	released	Not Reported	not reported	066489fe-03cb-5f80-968c-55b89c453e30	Breast, NOS	NA	NA	stage iia	2002	22842	2019-08-08T16:26:10.413151-05:00	NA	not reported	5th	N1a	0	NA	NA	NA	NA	Not Reported	NA	e55ddb59-dd32-5842-993b-87e6294c4180	NA	NA	62	-22842	1940	2009	e7090c21-d3bb-57df-9763-7b1017d0ccf3	Dead	not hispanic or latino	female	white	2712	NA	NA	Radiation Therapy, NOS
TCGA-BH-A1F6	Infiltrating duct carcinoma, NOS	not reported	MX	not reported	T4d	NA	Breast, NOS	No	no	8500/3	C50.9	released	No	not reported	0336bd05-fa44-5118-9e13-b7f00f8b4c55	Breast, NOS	NA	NA	not reported	1996	18691	2019-08-08T16:26:10.413151-05:00	NA	not reported	NA	N2a	0	NA	NA	NA	NA	Not Reported	NA	9498ea0a-8a1d-5eb7-b40a-1fea340ede36	NA	NA	51	-18691	1945	2004	db754ad4-df44-5873-b5ae-6c7731bf0ff0	Dead	not hispanic or latino	female	white	2965	NA	NA	Radiation Therapy, NOS
TCGA-BH-A1F8	Infiltrating duct carcinoma, NOS	not reported	M0	not reported	T4b	Stage IIIB	Breast, NOS	No	no	8500/3	C50.9	released	No	not reported	3da317c9-cd3d-5c70-8647-5ddec6ce8c9f	Breast, NOS	NA	NA	stage iiib	1999	32871	2019-08-08T16:26:10.413151-05:00	NA	not reported	5th	N2	0	NA	NA	NA	NA	Not Reported	NA	bd428274-3438-51dd-9a8d-26d1ac3424b3	NA	NA	90	-32871	1909	2001	1d0c746f-04c4-5751-bc6f-ced96c17d8d2	Dead	not hispanic or latino	female	white	1	NA	NA	Radiation Therapy, NOS
TCGA-BH-A1FB	Infiltrating duct carcinoma, NOS	not reported	M0	not reported	T2	Stage IIB	Breast, NOS	No	no	8500/3	C50.9	released	No	not reported	ed54950d-d03e-5513-b9ef-86f498523567	Breast, NOS	NA	NA	stage iib	2000	21933	2019-08-08T16:26:10.413151-05:00	NA	not reported	5th	N1b	0	NA	NA	NA	NA	Not Reported	NA	57f12511-283c-59eb-b887-20f59d0fc7dd	NA	NA	60	-21933	1940	2010	0f4c5fbd-bf51-5d51-9e33-1174bb6325f2	Dead	not hispanic or latino	female	white	3669	NA	NA	Radiation Therapy, NOS
TCGA-BH-A1FC	Medullary carcinoma, NOS	not reported	M0	not reported	T1c	Stage IIA	Breast, NOS	No	no	8510/3	C50.9	released	No	not reported	6dc2bc5b-66b4-5de3-baf9-a1dc0dc5ab1c	Breast, NOS	NA	NA	stage iia	1998	28706	2019-08-08T16:26:10.413151-05:00	NA	not reported	5th	N1b	0	NA	NA	NA	NA	Not Reported	NA	d5e4175f-4dd3-5d95-892e-87a66832cb01	NA	NA	78	-28706	1920	2007	4b727ed6-25ce-53c3-99dd-b9fa7da7825d	Dead	not hispanic or latino	female	black or african american	3472	NA	NA	Radiation Therapy, NOS
TCGA-BH-A1FD	Infiltrating duct carcinoma, NOS	not reported	M0	not reported	T1c	Stage I	Breast, NOS	No	no	8500/3	C50.9	released	No	not reported	f6c07d3d-e63c-5ea7-a16c-dd964944ca6e	Breast, NOS	NA	NA	stage i	1998	24940	2019-08-08T16:26:10.413151-05:00	NA	not reported	5th	N0	0	NA	NA	NA	NA	Not Reported	NA	c67d00be-5be2-586b-985b-28bec4491bd5	NA	NA	68	-24940	1930	2000	d76ebaaf-ccbd-5bf6-8079-89272145cf23	Dead	not hispanic or latino	female	white	1009	NA	NA	Radiation Therapy, NOS
TCGA-BH-A1FE	Infiltrating duct carcinoma, NOS	not reported	M0	not reported	T2	Stage IIB	Breast, NOS	No	no	8500/3	C50.9	released	No	not reported	78cb88db-9944-5fa7-b43c-e2a270c478c0	Breast, NOS	NA	NA	stage iib	1998	11650	2019-08-08T16:26:10.413151-05:00	NA	not reported	5th	N1	0	NA	NA	NA	NA	Not Reported	NA	d4f393c5-fdfb-5185-aa1d-f8fa87fa05f3	NA	NA	31	-11650	1967	2004	f6f7d922-79dc-570b-ae8c-8f02fcaa92bb	Dead	not hispanic or latino	female	white	2273	NA	NA	Radiation Therapy, NOS
TCGA-BH-A1FG	Infiltrating duct carcinoma, NOS	not reported	M0	not reported	T1c	Stage I	Breast, NOS	No	no	8500/3	C50.9	released	No	not reported	30f17e7b-041c-5f31-b42d-a53d2e5c4d2e	Breast, NOS	NA	NA	stage i	1998	32295	2019-08-08T16:26:10.413151-05:00	NA	not reported	5th	NX	0	NA	NA	NA	NA	Not Reported	NA	eac7786d-cb69-56b5-a611-de2d626b7956	NA	NA	88	-32295	1910	2008	090e1541-a6f8-5a51-a16c-e879b09c9fac	Dead	not hispanic or latino	female	white	577	NA	NA	Radiation Therapy, NOS
TCGA-BH-A1FH	Infiltrating duct carcinoma, NOS	not reported	M1	not reported	T2	Stage IV	Breast, NOS	No	no	8500/3	C50.9	released	No	not reported	3e637267-601f-5531-a9d2-00c836f71b7d	Breast, NOS	NA	NA	stage iv	1998	17172	2019-08-08T16:26:10.413151-05:00	NA	not reported	5th	N1b	0	NA	NA	NA	NA	Not Reported	NA	c2b0d002-bf54-5881-8279-522284db8b71	NA	NA	47	-17172	1951	2000	6d3ff51f-1431-5fe7-8a04-e3dd2e8b0390	Dead	not hispanic or latino	female	white	1034	NA	NA	Radiation Therapy, NOS
TCGA-BH-A1FJ	Infiltrating duct carcinoma, NOS	not reported	M0	not reported	T3	Stage IIIA	Breast, NOS	No	no	8500/3	C50.9	released	No	not reported	460fd561-3ea4-5af3-a702-11cf7032238a	Breast, NOS	NA	NA	stage iiia	1998	24262	2019-08-08T16:26:10.413151-05:00	NA	not reported	5th	N1b	0	NA	NA	NA	NA	Not Reported	NA	2d4e9fb5-1b2a-5283-986a-01b115d432b2	NA	NA	66	-24262	1932	2003	ebb99418-d9c0-5030-a587-43f562947190	Dead	not hispanic or latino	female	white	1927	NA	NA	Radiation Therapy, NOS
TCGA-BH-A1FL	Infiltrating duct carcinoma, NOS	not reported	M0	not reported	T2	Stage IIB	Breast, NOS	No	no	8500/3	C50.9	released	No	not reported	12daff90-df16-5927-a8ac-8623a1d0b093	Breast, NOS	NA	NA	stage iib	1998	25558	2019-08-08T16:26:10.413151-05:00	NA	not reported	5th	N1b	0	NA	NA	NA	NA	Not Reported	NA	5b9b719d-ed7e-5c9e-9014-d1b76f2c1262	NA	NA	69	-25558	1929	2002	2e87f306-8d49-5b1b-a177-ec82b80b4ce1	Dead	not hispanic or latino	female	white	1673	NA	NA	Radiation Therapy, NOS
TCGA-BH-A1FM	Infiltrating duct carcinoma, NOS	not reported	M0	not reported	T2	Stage IIIA	Breast, NOS	No	no	8500/3	C50.9	released	No	not reported	b66e825a-df47-5a1e-9d80-b58b0b37afd5	Breast, NOS	NA	NA	stage iiia	1998	16289	2019-08-08T16:26:10.413151-05:00	NA	not reported	5th	N2	0	NA	NA	NA	NA	Not Reported	NA	eb4a987f-e847-55a2-8850-5a08e0c26ec0	NA	NA	44	-16289	1954	2001	d0162b52-1310-5ff8-a3ac-998c27a51d33	Dead	not hispanic or latino	female	white	1388	NA	NA	Radiation Therapy, NOS
TCGA-BH-A1FN	Infiltrating duct carcinoma, NOS	not reported	M0	not reported	T2	Stage IIA	Breast, NOS	No	no	8500/3	C50.9	released	No	not reported	3cae8785-d20f-5df7-ba7d-64a322a9cbae	Breast, NOS	NA	NA	stage iia	1997	12525	2019-08-08T16:26:10.413151-05:00	NA	not reported	5th	N0	0	NA	NA	NA	NA	Not Reported	NA	ef04ed39-de93-5067-adb8-697711dbd64c	NA	NA	34	-12525	1963	2003	d39c120a-d267-5b1b-acd2-03ddda9d04f1	Dead	not hispanic or latino	female	white	2192	NA	NA	Radiation Therapy, NOS
TCGA-BH-A1FR	Infiltrating duct mixed with other types of carcinoma	not reported	M0	not reported	T4b	Stage IIIB	Breast, NOS	No	no	8523/3	C50.9	released	No	not reported	457d0484-70b2-5c44-8bb3-5bda11d86c81	Breast, NOS	NA	NA	stage iiib	1997	26684	2019-08-08T16:26:10.413151-05:00	NA	not reported	5th	N1a	0	NA	NA	NA	NA	Not Reported	NA	7d5ee033-6300-58e8-8222-5b3e471de8cc	NA	NA	73	-26684	1924	2001	cecfe44e-d20f-5f58-a703-77b39e9ef7af	Dead	not hispanic or latino	female	white	1642	NA	NA	Radiation Therapy, NOS
TCGA-BH-A202	Infiltrating duct carcinoma, NOS	not reported	M0	not reported	T2	Stage II	Breast, NOS	No	no	8500/3	C50.9	released	No	not reported	f077fc93-9da9-5d47-8e41-b7905d7e854c	Breast, NOS	795	NA	stage ii	2011	22052	2019-08-08T16:26:35.695100-05:00	NA	not reported	6th	N0	0	NA	NA	NA	NA	Not Reported	NA	d9b05572-f142-54f7-95cc-c6fa8024cf64	NA	NA	60	-22052	1951	NA	7f013fcc-f3b5-5d81-94cc-05ca282e22a2	Alive	not hispanic or latino	female	white	NA	NA	NA	Radiation Therapy, NOS
TCGA-BH-A203	Infiltrating duct carcinoma, NOS	not reported	M0	not reported	T2	Stage IIB	Breast, NOS	No	no	8500/3	C50.9	released	No	not reported	8e7cc474-6fbe-56eb-acaa-14998574ea5f	Breast, NOS	NA	NA	stage iib	1996	28609	2019-08-08T16:26:35.695100-05:00	NA	not reported	5th	N1b	0	NA	NA	NA	NA	Not Reported	NA	6eaac709-15f2-58fc-9525-ba1d904e7346	NA	NA	78	-28609	1918	1999	b7973e03-f89e-5d86-a85f-8e9d9c30a51c	Dead	not hispanic or latino	female	white	1174	NA	NA	Radiation Therapy, NOS
TCGA-BH-A204	Infiltrating duct carcinoma, NOS	not reported	M0	not reported	T2	Stage IIB	Breast, NOS	No	no	8500/3	C50.9	released	No	not reported	059b1be9-4658-53be-8740-b89c522ca642	Breast, NOS	NA	NA	stage iib	1996	29529	2019-08-08T16:26:35.695100-05:00	NA	not reported	5th	N1b	0	NA	NA	NA	NA	Not Reported	NA	54b1c0b8-5771-5726-a0d8-f78f91514a88	NA	NA	80	-29529	1916	2002	290ec5a9-1509-5899-a7c7-ae4cb05e7435	Dead	not hispanic or latino	female	white	2534	NA	NA	Radiation Therapy, NOS
TCGA-BH-A208	Infiltrating duct carcinoma, NOS	not reported	M0	not reported	T2	Stage IIB	Breast, NOS	No	no	8500/3	C50.9	released	No	not reported	4abc3322-6d01-5349-bb00-380784d86a9b	Breast, NOS	NA	NA	stage iib	1995	17715	2019-08-08T16:26:35.695100-05:00	NA	not reported	5th	N1b	0	NA	NA	NA	NA	Not Reported	NA	8098a274-3333-5e8a-b7b4-1fb18136fa2c	NA	NA	48	-17715	1947	1999	5040ad16-7687-5baf-aaab-2f5880f45e67	Dead	not hispanic or latino	female	white	1759	NA	NA	Radiation Therapy, NOS
TCGA-BH-A209	Medullary carcinoma, NOS	not reported	M0	not reported	T1c	Stage I	Breast, NOS	No	no	8510/3	C50.9	released	No	not reported	df32c820-08be-516e-a3bc-76077b44844d	Breast, NOS	NA	NA	stage i	1996	28403	2019-08-08T16:26:35.695100-05:00	NA	not reported	5th	N0	0	NA	NA	NA	NA	Not Reported	NA	c1fd899c-93f2-5ec6-8e0f-9c22faf1f341	NA	NA	77	-28403	1919	2006	ebd4d143-914d-5ca3-bf86-fb658320ca9d	Dead	not hispanic or latino	female	black or african american	3959	NA	NA	Radiation Therapy, NOS
TCGA-BH-A28Q	Lobular carcinoma, NOS	not reported	M0	not reported	T2	Stage IIB	Breast, NOS	No	no	8520/3	C50.9	released	No	not reported	e75ff919-593d-5427-86f1-e73a00ead324	Breast, NOS	1119	NA	stage iib	2010	16882	2019-08-08T16:26:35.695100-05:00	NA	not reported	7th	N1a	0	NA	NA	NA	NA	Not Reported	NA	30a8ffa6-083c-5f07-8b22-22d7a5cadbb5	NA	NA	46	-16882	1964	NA	e54975ba-b1ee-5f9d-976f-31ea114ae7f7	Alive	not hispanic or latino	female	white	NA	NA	NA	Radiation Therapy, NOS
TCGA-BH-A2L8	Lobular carcinoma, NOS	not reported	M0	not reported	T2	Stage IIA	Breast, NOS	No	no	8520/3	C50.9	released	No	not reported	e9d6d3d5-0bd0-55d6-8035-f44aabd43cf3	Breast, NOS	612	NA	stage iia	2011	16658	2019-08-08T16:26:35.695100-05:00	NA	not reported	7th	N0 (i-)	0	NA	NA	NA	NA	Not Reported	NA	bcfcafd1-4ad0-5bce-8493-1aee2ba3f3f5	NA	NA	45	-16658	1966	NA	6f701972-29e1-5291-bc79-7f30afd3ced8	Alive	not hispanic or latino	female	white	NA	NA	NA	Radiation Therapy, NOS
TCGA-BH-A42T	Lobular carcinoma, NOS	not reported	M0	not reported	T2	Stage IIA	Breast, NOS	No	no	8520/3	C50.9	released	No	not reported	c6bea9fa-ecd1-5e5b-9207-5f26bc928e0e	Breast, NOS	30	NA	stage iia	2012	27731	2019-08-08T16:26:35.695100-05:00	NA	not reported	7th	N0 (i+)	0	NA	NA	NA	NA	Not Reported	NA	1db8207b-2175-5786-9908-319e9feeeef4	NA	NA	75	-27731	1937	NA	acb5e789-899c-5754-9006-0fd659e91196	Dead	not hispanic or latino	female	black or african american	320	NA	NA	Radiation Therapy, NOS
TCGA-BH-A42V	Infiltrating duct carcinoma, NOS	not reported	M0	not reported	T1c	Stage IB	Breast, NOS	No	no	8500/3	C50.9	released	No	not reported	7eb6a599-2ee2-5137-9bae-888799e94e23	Breast, NOS	635	NA	stage ib	2012	15158	2019-08-08T16:26:35.695100-05:00	NA	not reported	7th	N1mi	0	NA	NA	NA	NA	Not Reported	NA	5d950ae3-9d04-570f-bc3c-ef03738a1e0a	NA	NA	41	-15158	1971	NA	f3b2aad9-add6-5d43-aea2-4784e70bb8d8	Alive	not hispanic or latino	female	black or african american	NA	NA	NA	Radiation Therapy, NOS
TCGA-BH-A5IZ	Infiltrating duct carcinoma, NOS	not reported	cM0 (i+)	not reported	T2	Stage IIB	Breast, NOS	No	no	8500/3	C50.9	released	No	not reported	3f14c24b-fe47-5d5f-b707-e22547fb9b13	Breast, NOS	567	NA	stage iib	2012	18927	2019-08-08T16:26:35.695100-05:00	NA	not reported	7th	N1a	0	NA	NA	NA	NA	Not Reported	NA	7ec449f0-96a3-5a5b-bbcc-ff9ac5e2e785	NA	NA	51	-18927	1961	NA	55df0779-735f-58fe-bf46-c12d7e8112f7	Alive	not hispanic or latino	female	black or african american	NA	NA	NA	Radiation Therapy, NOS
TCGA-BH-A5J0	Infiltrating duct carcinoma, NOS	not reported	M0	not reported	T1c	Stage IA	Breast, NOS	No	no	8500/3	C50.9	released	No	not reported	0c102a46-69f5-57c5-861e-09295f6a26ef	Breast, NOS	715	NA	stage ia	2012	23072	2019-08-08T16:26:35.695100-05:00	NA	not reported	7th	N0	0	NA	NA	NA	NA	Not Reported	NA	c52727d4-f1fa-5838-8a9b-acab1ac1d2b7	NA	NA	63	-23072	1949	NA	04393c73-6b0c-50dd-90ff-a68dc03849e4	Alive	not hispanic or latino	female	black or african american	NA	NA	NA	Radiation Therapy, NOS
TCGA-BH-A6R8	Infiltrating duct carcinoma, NOS	not reported	M0	not reported	T2	Stage IIA	Breast, NOS	No	no	8500/3	C50.9	released	No	not reported	78b5d1b9-dc82-5206-bf49-f005a94778e8	Breast, NOS	293	NA	stage iia	2012	16829	2019-08-08T16:26:35.695100-05:00	NA	not reported	7th	N0	0	NA	NA	NA	NA	Not Reported	NA	6a469a78-08f7-5939-9692-b0f5491777ae	NA	NA	46	-16829	1966	NA	485384ff-cf07-58eb-a8ce-7ec4d7f86e6e	Alive	not hispanic or latino	female	black or african american	NA	NA	NA	Radiation Therapy, NOS
TCGA-BH-A8FY	Lobular carcinoma, NOS	not reported	M0	not reported	T1c	Stage IA	Breast, NOS	No	yes	8520/3	C50.9	released	Not Reported	not reported	75f3e422-eb7e-59d1-bf36-a24eb881fb94	Breast, NOS	NA	NA	stage ia	2012	31932	2019-08-08T16:26:35.695100-05:00	NA	not reported	7th	N0 (i+)	0	NA	NA	NA	NA	Not Reported	NA	71703175-5cc9-589f-9466-3e7c4c3d7f93	NA	NA	87	-31932	1925	2012	c9251bb4-c557-525d-ac05-ca63d81b2fce	Dead	not hispanic or latino	female	white	295	NA	NA	Radiation Therapy, NOS
TCGA-BH-A8G0	Lobular carcinoma, NOS	not reported	M0	not reported	T2	Stage IIB	Breast, NOS	No	no	8520/3	C50.9	released	No	not reported	a3829f4d-6727-5c15-b1a7-eb6d7d547588	Breast, NOS	662	NA	stage iib	2012	19975	2019-08-08T16:26:35.695100-05:00	NA	not reported	7th	N1a	0	NA	NA	NA	NA	Not Reported	NA	1a3f1d4e-3e44-5a46-a42e-9c3112ec510d	NA	NA	54	-19975	1958	NA	cbd3a482-64a0-533d-a767-d9f0202074c2	Alive	not hispanic or latino	female	white	NA	NA	NA	Radiation Therapy, NOS
TCGA-BH-AB28	Lobular carcinoma, NOS	not reported	M0	not reported	T3	Stage IIIA	Breast, NOS	No	no	8520/3	C50.9	released	No	not reported	046c2db8-33b4-5c68-8ac0-711c8ac87706	Breast, NOS	287	NA	stage iiia	2013	19570	2019-08-08T16:26:35.695100-05:00	NA	not reported	7th	N1a	0	NA	NA	NA	NA	Not Reported	NA	02797db3-0f50-5e7f-865b-6f6e0a46f540	NA	NA	53	-19570	1960	NA	dcf9348b-bcac-5ba7-bccb-d21ef1460231	Alive	not hispanic or latino	female	white	NA	NA	NA	Radiation Therapy, NOS
TCGA-C8-A1HE	Infiltrating duct carcinoma, NOS	not reported	M0	not reported	T2	Stage IIA	Breast, NOS	No	no	8500/3	C50.9	released	No	not reported	65407607-8c12-53b8-81a2-6f84945a847a	Breast, NOS	375	NA	stage iia	2010	NA	2019-08-08T16:26:35.695100-05:00	NA	not reported	6th	N0	0	NA	NA	NA	NA	Not Reported	NA	6b8feb62-138e-5e2b-a082-97876eb10afc	NA	NA	59	NA	1951	NA	58f39567-33fc-52c5-b323-a98a553425e7	Alive	not hispanic or latino	female	asian	NA	NA	NA	Radiation Therapy, NOS
TCGA-C8-A1HF	Infiltrating duct carcinoma, NOS	not reported	M0	not reported	T2	Stage IIA	Breast, NOS	No	no	8500/3	C50.9	released	No	not reported	7f3b1aa4-63d0-52ca-a269-a0891e010bc4	Breast, NOS	332	NA	stage iia	2010	NA	2019-08-08T16:26:35.695100-05:00	NA	not reported	6th	N0	0	NA	NA	NA	NA	Not Reported	NA	e7df58c9-d1ef-5178-8d02-a3e6e39e36f1	NA	NA	48	NA	1962	NA	ed7d585b-24c5-5203-a0c9-4c4a10fbec6d	Alive	not hispanic or latino	female	asian	NA	NA	NA	Radiation Therapy, NOS
TCGA-C8-A1HG	Infiltrating duct carcinoma, NOS	not reported	M0	not reported	T2	Stage IIA	Breast, NOS	No	no	8500/3	C50.9	released	No	not reported	536caf89-b766-58af-a5f3-8edcd10085ea	Breast, NOS	345	NA	stage iia	2010	NA	2019-08-08T16:26:35.695100-05:00	NA	not reported	6th	N0	0	NA	NA	NA	NA	Not Reported	NA	a34a519a-b030-56a6-95c3-af4276faea5f	NA	NA	50	NA	1960	NA	08c3ae4b-9db0-58e8-82da-8a3dec41df79	Alive	not hispanic or latino	female	asian	NA	NA	NA	Radiation Therapy, NOS
TCGA-C8-A1HI	Infiltrating duct carcinoma, NOS	not reported	M0	not reported	T2	Stage IIIA	Breast, NOS	Yes	no	8500/3	C50.9	released	No	not reported	f0358f25-5b5c-58bd-bed7-7e56c7d72c1f	Breast, NOS	343	NA	stage iiia	2010	NA	2019-08-08T16:26:35.695100-05:00	NA	not reported	6th	N2	0	NA	NA	NA	NA	Not Reported	NA	6e9332fc-5bdd-5303-a412-3bcbeee6072c	NA	NA	40	NA	1970	NA	26d05a3d-f047-5a5f-b69c-528910ab1c0b	Alive	not hispanic or latino	female	asian	NA	NA	NA	Radiation Therapy, NOS
TCGA-C8-A1HJ	Infiltrating duct carcinoma, NOS	not reported	M0	not reported	T2	Stage IIA	Breast, NOS	No	no	8500/3	C50.9	released	No	not reported	8c99b99e-dcea-5ca1-8158-6065f6914b69	Breast, NOS	5	NA	stage iia	2010	19629	2019-08-08T16:26:35.695100-05:00	NA	not reported	6th	N0	0	NA	NA	NA	NA	Not Reported	NA	916fdd52-1845-54e8-97b2-5a5a636623c9	NA	NA	53	-19629	1957	NA	42df9944-2f91-56d7-837e-40fb33459908	Alive	not hispanic or latino	female	asian	NA	NA	NA	Radiation Therapy, NOS
TCGA-C8-A1HK	Infiltrating duct carcinoma, NOS	not reported	M0	not reported	T2	Stage IIB	Breast, NOS	No	no	8500/3	C50.9	released	No	not reported	96d1a05b-c25e-5e6d-aa2f-3accca42cec7	Breast, NOS	366	NA	stage iib	2010	NA	2019-08-08T16:26:35.695100-05:00	NA	not reported	6th	N1	0	NA	NA	NA	NA	Not Reported	NA	aac12d50-0fdb-523e-b1b9-a8ef48fbf713	NA	NA	53	NA	1957	NA	724acf64-711e-566c-a3bf-0e03bd193f94	Alive	not hispanic or latino	female	asian	NA	NA	NA	Radiation Therapy, NOS
TCGA-C8-A1HL	Mucinous adenocarcinoma	not reported	M0	not reported	T3	Stage IIIA	Breast, NOS	No	yes	8480/3	C50.9	released	Not Reported	not reported	ab7cdf59-0d25-587c-a059-51c5f8cbdf71	Breast, NOS	317	NA	stage iiia	2010	NA	2019-08-08T16:26:35.695100-05:00	NA	not reported	6th	N1	0	NA	NA	NA	NA	Not Reported	NA	2c3734f6-b9f1-5ce2-9db2-b5112fea5236	NA	NA	38	NA	1972	NA	cfa10096-f8f7-5582-86e6-4e1573f64fa6	Alive	not hispanic or latino	female	asian	NA	NA	NA	Radiation Therapy, NOS
TCGA-C8-A1HM	Infiltrating duct carcinoma, NOS	not reported	M0	not reported	T2	Stage IIA	Breast, NOS	No	no	8500/3	C50.9	released	No	not reported	818816a6-fabd-5cb8-98ed-94ed7b155b08	Breast, NOS	375	NA	stage iia	2010	27063	2019-08-08T16:27:01.852201-05:00	NA	not reported	6th	N0	0	NA	NA	NA	NA	Not Reported	NA	3d658c22-0aec-5a69-b324-935f3a901060	NA	NA	74	-27063	1936	NA	7a6c95c3-338e-5ca3-a967-f42d32f2f501	Alive	not hispanic or latino	female	asian	NA	NA	NA	Radiation Therapy, NOS
TCGA-C8-A1HN	Infiltrating duct carcinoma, NOS	not reported	M0	not reported	T2	Stage IIA	Breast, NOS	No	no	8500/3	C50.9	released	No	not reported	5030e23b-8273-5e3a-94f3-c113ca3110d6	Breast, NOS	394	NA	stage iia	2010	20712	2019-08-08T16:27:01.852201-05:00	NA	not reported	6th	N0	0	NA	NA	NA	NA	Not Reported	NA	b1880988-ec34-5190-bca0-a03714a563ae	NA	NA	56	-20712	1954	NA	826fe703-fcaf-5f57-8064-5d4374ac9a00	Alive	not hispanic or latino	female	asian	NA	NA	NA	Radiation Therapy, NOS
TCGA-C8-A1HO	Infiltrating duct carcinoma, NOS	not reported	M0	not reported	T3	Stage IIIC	Breast, NOS	No	no	8500/3	C50.9	released	No	not reported	f61182bb-81e1-5cdc-b6a4-76ed7c59f7e7	Breast, NOS	375	NA	stage iiic	2010	12715	2019-08-08T16:27:01.852201-05:00	NA	not reported	6th	N3	0	NA	NA	NA	NA	Not Reported	NA	cb560483-e78a-5873-81f8-739e9ae8fc34	NA	NA	34	-12715	1976	NA	843b2726-a23a-596d-887b-7850bf49201f	Alive	not hispanic or latino	female	asian	NA	NA	NA	Radiation Therapy, NOS
TCGA-C8-A26V	Infiltrating duct carcinoma, NOS	not reported	M0	not reported	T3	Stage IIIA	Breast, NOS	No	no	8500/3	C50.9	released	No	not reported	9cca2abd-3f4f-5aad-ae58-2e0a48c6aac9	Breast, NOS	616	NA	stage iiia	2010	17468	2019-08-08T16:27:01.852201-05:00	NA	not reported	6th	N2	0	NA	NA	NA	NA	Not Reported	NA	97ad530b-0c0c-5d87-b1fb-278c3fcd0ffe	NA	NA	47	-17468	1963	NA	5b4334e4-9111-5afa-8336-865253352084	Alive	not hispanic or latino	female	asian	NA	NA	NA	Radiation Therapy, NOS
TCGA-C8-A26W	Infiltrating duct carcinoma, NOS	not reported	M0	not reported	T2	Stage IIB	Breast, NOS	No	no	8500/3	C50.9	released	No	not reported	422ccfc4-4eab-5f41-99b0-ee74dcea0c87	Breast, NOS	381	NA	stage iib	2010	21391	2019-08-08T16:27:01.852201-05:00	NA	not reported	6th	N1	0	NA	NA	NA	NA	Not Reported	NA	8a5d83ff-b566-52ae-b784-92cd7775bccf	NA	NA	58	-21391	1952	NA	887e4eb3-2340-515b-b5b6-7242a16cbd51	Alive	not hispanic or latino	female	asian	NA	NA	NA	Radiation Therapy, NOS
TCGA-C8-A26X	Infiltrating duct carcinoma, NOS	not reported	M0	not reported	T1	Stage IIA	Breast, NOS	No	no	8500/3	C50.9	released	No	not reported	6888f83f-f606-5b2c-bdca-23f409aca765	Breast, NOS	376	NA	stage iia	2010	21463	2019-08-08T16:27:01.852201-05:00	NA	not reported	6th	N1	0	NA	NA	NA	NA	Not Reported	NA	be700eca-a45a-56a9-a5d7-aa7a1ad9f749	NA	NA	58	-21463	1952	NA	95e9aeca-4480-51c6-9dda-33343530082b	Alive	not hispanic or latino	female	asian	NA	NA	NA	Radiation Therapy, NOS
TCGA-C8-A26Y	Infiltrating duct carcinoma, NOS	not reported	M0	not reported	T2	Stage IIA	Breast, NOS	No	no	8500/3	C50.9	released	No	not reported	6553fcb6-886f-5835-ace7-82c16e7a7932	Breast, NOS	0	NA	stage iia	2010	32872	2019-08-08T16:27:01.852201-05:00	NA	not reported	6th	N0	0	NA	NA	NA	NA	Not Reported	NA	ea2cec7f-7a86-5168-8cf3-e034c27ea216	NA	NA	90	-32872	1920	NA	34633ac6-628e-5ad8-af25-cce56a8f2ddf	Alive	not hispanic or latino	female	asian	NA	NA	NA	Radiation Therapy, NOS
TCGA-C8-A26Z	Infiltrating duct carcinoma, NOS	not reported	M0	not reported	T2	Stage IIA	Breast, NOS	No	no	8500/3	C50.9	released	No	not reported	45ccb39e-12c4-5e87-8fac-73fc4b932e98	Breast, NOS	470	NA	stage iia	2010	NA	2019-08-08T16:27:01.852201-05:00	NA	not reported	6th	N0	0	NA	NA	NA	NA	Not Reported	NA	015ad0e3-a5f4-5fa2-b782-c96186606df9	NA	NA	59	NA	1951	NA	67d497b4-4bde-525c-9ad3-cc44db98ac85	Alive	not hispanic or latino	female	asian	NA	NA	NA	Radiation Therapy, NOS
TCGA-C8-A273	Infiltrating duct carcinoma, NOS	not reported	M0	not reported	T2	Stage IIB	Breast, NOS	No	no	8500/3	C50.9	released	No	not reported	1da73695-02b9-5cd5-ad45-6b176a2d5935	Breast, NOS	513	NA	stage iib	2010	NA	2019-08-08T16:27:01.852201-05:00	NA	not reported	6th	N1	0	NA	NA	NA	NA	Not Reported	NA	e0873c7b-c042-5a42-b20e-0d06ce9ccc07	NA	NA	29	NA	1981	NA	79b96140-5e74-5c8c-9dfb-d186b6109115	Alive	not hispanic or latino	female	asian	NA	NA	NA	Radiation Therapy, NOS
TCGA-C8-A274	Infiltrating duct carcinoma, NOS	not reported	M0	not reported	T2	Stage IIA	Breast, NOS	No	no	8500/3	C50.9	released	No	not reported	d0002c91-77df-5936-a80f-f369ec24ca30	Breast, NOS	508	NA	stage iia	2010	23337	2019-08-08T16:27:01.852201-05:00	NA	not reported	6th	N0	0	NA	NA	NA	NA	Not Reported	NA	23cde622-02b4-525b-9a46-a4e0ff6bb1b2	NA	NA	63	-23337	1947	NA	132c66e0-9d82-5fcd-b413-35cf11fa1f55	Alive	not hispanic or latino	female	asian	NA	NA	NA	Radiation Therapy, NOS
TCGA-C8-A275	Infiltrating duct carcinoma, NOS	not reported	M0	not reported	T1	Stage IIA	Breast, NOS	No	no	8500/3	C50.9	released	No	not reported	615ac72d-4ca9-5a84-b9de-0dfc308a34ca	Breast, NOS	1	NA	stage iia	2010	20774	2019-08-08T16:27:01.852201-05:00	NA	not reported	6th	N1	0	NA	NA	NA	NA	Not Reported	NA	fbe68fed-531d-5359-81cc-7e7b13a361d2	NA	NA	56	-20774	1954	NA	8882a418-dce9-5bb3-af50-b0dc2305d8ab	Alive	not hispanic or latino	female	asian	NA	NA	NA	Radiation Therapy, NOS
TCGA-C8-A278	Infiltrating duct carcinoma, NOS	not reported	M0	not reported	T2	Stage IIIA	Breast, NOS	No	no	8500/3	C50.9	released	No	not reported	931d65b6-e2d3-52c0-a2c1-7564de179573	Breast, NOS	297	NA	stage iiia	2010	22598	2019-08-08T16:27:01.852201-05:00	NA	not reported	6th	N2	0	NA	NA	NA	NA	Not Reported	NA	4b8a3687-e971-514d-ba0d-05831835b1af	NA	NA	61	-22598	1949	NA	87ba5fa9-bf2b-5d23-80d0-537a4cb50ba8	Alive	not hispanic or latino	female	asian	NA	NA	NA	Radiation Therapy, NOS
TCGA-C8-A27B	Infiltrating duct carcinoma, NOS	not reported	M0	not reported	T3	Stage IIB	Breast, NOS	No	no	8500/3	C50.9	released	No	not reported	27209e58-f960-5066-a9a2-47f4dc3b8662	Breast, NOS	439	NA	stage iib	2011	17763	2019-08-08T16:27:01.852201-05:00	NA	not reported	6th	N0	0	NA	NA	NA	NA	Not Reported	NA	443cc8e1-d41c-5933-8cc0-d91ff09c2f4f	NA	NA	48	-17763	1963	NA	3cf503ff-6c25-509a-9f3e-10446142d5db	Alive	not hispanic or latino	female	asian	NA	NA	NA	Radiation Therapy, NOS
TCGA-C8-A3M7	Lobular carcinoma, NOS	not reported	M0	not reported	T4b	Stage IIIB	Breast, NOS	No	no	8520/3	C50.9	released	No	not reported	47c4a1e6-97aa-597e-93fd-a8fcd223ed67	Breast, NOS	1	NA	stage iiib	2010	22096	2019-08-08T16:27:01.852201-05:00	NA	not reported	7th	N0	0	NA	NA	NA	NA	Not Reported	NA	e26b3d63-9390-52a4-9f79-a5f2d919de43	NA	NA	60	-22096	1950	NA	cfa08fca-c0dc-5a2c-a58a-483eb7bda86c	Dead	not hispanic or latino	female	asian	1034	NA	NA	Radiation Therapy, NOS
TCGA-C8-A3M8	Lobular carcinoma, NOS	not reported	M0	not reported	T1c	Stage IA	Breast, NOS	No	no	8520/3	C50.9	released	No	not reported	0d4f9079-36be-5934-8448-13aa1d6cce0f	Breast, NOS	394	NA	stage ia	2011	24877	2019-08-08T16:27:01.852201-05:00	NA	not reported	7th	N0	0	NA	NA	NA	NA	Not Reported	NA	bc0e03e1-6590-5450-a65c-b661d38f8c72	NA	NA	68	-24877	1943	NA	1ca0758a-cc27-58c0-a2a6-b631e035be87	Alive	not hispanic or latino	female	asian	NA	NA	NA	Radiation Therapy, NOS
TCGA-C8-A8HP	Metaplastic carcinoma, NOS	not reported	M0	not reported	T2	Stage IIIA	Breast, NOS	No	no	8575/3	C50.9	released	No	not reported	abad33e3-9625-5c68-9927-f5dbcaddf36f	Breast, NOS	396	NA	stage iiia	2013	21613	2019-08-08T16:27:01.852201-05:00	NA	not reported	7th	N2	0	NA	NA	NA	NA	Not Reported	NA	31d881b1-3bbc-5a09-aad6-7b97890e2958	NA	NA	59	-21613	1954	NA	29ae85ee-5ddf-57fd-a02b-0ae6601c8115	Alive	not hispanic or latino	female	asian	NA	NA	NA	Radiation Therapy, NOS
TCGA-D8-A1J8	Infiltrating duct carcinoma, NOS	not reported	M0	not reported	T2	Stage IIB	Breast, NOS	No	no	8500/3	C50.9	released	No	not reported	b5b690aa-7a72-5eb8-9d8a-080912d6f6b5	Breast, NOS	431	NA	stage iib	2010	28444	2019-08-08T16:27:01.852201-05:00	NA	not reported	7th	N1a	0	NA	NA	NA	NA	Not Reported	NA	99826574-bed5-59f8-8809-0dafe392449c	NA	NA	77	-28444	1933	NA	f2b707e6-27f6-5ad3-bfd4-9b25424449d3	Alive	not hispanic or latino	female	white	NA	NA	NA	Radiation Therapy, NOS
TCGA-D8-A1J9	Infiltrating duct carcinoma, NOS	not reported	M0	not reported	T1c	Stage IA	Breast, NOS	No	no	8500/3	C50.9	released	No	not reported	fd8a3853-28e2-5134-9f8f-a285c4205e35	Breast, NOS	532	NA	stage ia	2010	17879	2019-08-08T16:27:01.852201-05:00	NA	not reported	7th	N0	0	NA	NA	NA	NA	Not Reported	NA	ac5cb7a1-a6a5-52bc-b289-23eb05b1ea72	NA	NA	48	-17879	1962	NA	afe8c236-5d48-5183-9547-8a58a6f0459d	Alive	not hispanic or latino	female	white	NA	NA	NA	Radiation Therapy, NOS
TCGA-D8-A1JA	Infiltrating duct carcinoma, NOS	not reported	M0	not reported	T4b	NA	Breast, NOS	No	no	8500/3	C50.9	released	No	not reported	3bb5dd4f-16b3-5471-95f5-aa53d1fc9f31	Breast, NOS	502	NA	not reported	2010	21918	2019-08-08T16:27:01.852201-05:00	NA	not reported	7th	NX	0	NA	NA	NA	NA	Not Reported	NA	b3a1cbed-7209-519a-b9a2-19ec5e6222dd	NA	NA	60	-21918	1950	NA	6739f40e-2596-5501-9ca0-3735c1ed20ca	Alive	not hispanic or latino	female	white	NA	NA	NA	Radiation Therapy, NOS
TCGA-D8-A1JB	Infiltrating duct carcinoma, NOS	not reported	M0	not reported	T2	Stage IIB	Breast, NOS	No	no	8500/3	C50.9	released	No	not reported	653a0d6b-1f46-559a-b7cf-ac46e6627048	Breast, NOS	1688	NA	stage iib	2010	19822	2019-08-08T16:27:01.852201-05:00	NA	not reported	7th	N1a	0	NA	NA	NA	NA	Not Reported	NA	7b540d88-61fe-57f9-9ef7-3a6f7cf16b03	NA	NA	54	-19822	1956	NA	1c2dd34d-fac3-5550-b371-a5b88b1b6350	Alive	not hispanic or latino	female	white	NA	NA	NA	Radiation Therapy, NOS
TCGA-D8-A1JC	Infiltrating duct carcinoma, NOS	not reported	M0	not reported	T2	Stage IIIA	Breast, NOS	No	no	8500/3	C50.9	released	No	not reported	fbdfe18b-924f-585f-aa1b-84e7fa0d4634	Breast, NOS	480	NA	stage iiia	2010	21898	2019-08-08T16:27:01.852201-05:00	NA	not reported	7th	N2a	0	NA	NA	NA	NA	Not Reported	NA	8aba131b-cf3a-5439-84a2-64450c7f5bb7	NA	NA	59	-21898	1951	NA	d2345126-eae3-5f64-9ac5-2f83d1ab319e	Alive	not hispanic or latino	female	white	NA	NA	NA	Radiation Therapy, NOS
TCGA-D8-A1JD	Infiltrating duct carcinoma, NOS	not reported	M0	not reported	T2	Stage IIB	Breast, NOS	No	no	8500/3	C50.9	released	No	not reported	04a2c55a-c6e4-50da-ba6a-c3af6373be9d	Breast, NOS	552	NA	stage iib	2010	15166	2019-08-08T16:27:01.852201-05:00	NA	not reported	7th	N1a	0	NA	NA	NA	NA	Not Reported	NA	b11c753b-f942-5dd4-b96e-c90261045218	NA	NA	41	-15166	1969	NA	a6aa2ef7-c377-583e-a402-06c7b99836b5	Alive	not hispanic or latino	female	white	NA	NA	NA	Radiation Therapy, NOS
TCGA-D8-A1JE	Infiltrating duct carcinoma, NOS	not reported	M0	not reported	T1c	Stage IIA	Breast, NOS	No	no	8500/3	C50.9	released	No	not reported	38115d32-d765-5290-921e-c974cbcc217d	Breast, NOS	575	NA	stage iia	2010	22683	2019-08-08T16:27:01.852201-05:00	NA	not reported	7th	N1a	0	NA	NA	NA	NA	Not Reported	NA	19083288-164b-559b-b706-b3bc26bbe6ea	NA	NA	62	-22683	1948	NA	40129e15-77c1-50f6-8cfc-56a5daa0419d	Alive	not hispanic or latino	female	white	NA	NA	NA	Radiation Therapy, NOS
TCGA-D8-A1JF	Infiltrating duct carcinoma, NOS	not reported	M0	not reported	T1c	Stage IIIA	Breast, NOS	No	no	8500/3	C50.9	released	No	not reported	6251c33d-4c29-5c80-b4f2-2505d2e4bc80	Breast, NOS	366	NA	stage iiia	2010	29199	2019-08-08T16:27:01.852201-05:00	NA	not reported	7th	N2a	0	NA	NA	NA	NA	Not Reported	NA	62e07073-c44f-5650-9d86-cdd237f2681d	NA	NA	79	-29199	1931	NA	cd45c0c5-f31e-5eef-96fb-f00228cce9b1	Alive	not hispanic or latino	female	white	NA	NA	NA	Radiation Therapy, NOS
TCGA-D8-A1JG	Infiltrating duct carcinoma, NOS	not reported	M0	not reported	T2	Stage IIA	Breast, NOS	No	no	8500/3	C50.9	released	No	not reported	236cd04a-9c42-5813-ac80-9a4a89105010	Breast, NOS	1612	NA	stage iia	2010	22878	2019-08-08T16:27:01.852201-05:00	NA	not reported	7th	N0	0	NA	NA	NA	NA	Not Reported	NA	995c596f-edcd-5abb-a6c0-61da96c1460e	NA	NA	62	-22878	1948	NA	a988006f-1dd0-565c-a5b8-d44fd6c2fe09	Alive	not hispanic or latino	female	white	NA	NA	NA	Radiation Therapy, NOS
TCGA-D8-A1JH	Infiltrating duct carcinoma, NOS	not reported	M0	not reported	T1c	Stage IA	Breast, NOS	No	no	8500/3	C50.9	released	No	not reported	7c95352e-1c13-5932-a1c1-7b1886e8fef7	Breast, NOS	426	NA	stage ia	2010	20497	2019-08-08T16:27:01.852201-05:00	NA	not reported	7th	N0	0	NA	NA	NA	NA	Not Reported	NA	32a1dd86-0e50-538b-bfc2-2098ac13be82	NA	NA	56	-20497	1954	NA	00b10079-1d5b-581b-ae71-871981070298	Alive	not hispanic or latino	female	white	NA	NA	NA	Radiation Therapy, NOS
TCGA-D8-A1JI	Infiltrating duct carcinoma, NOS	not reported	MX	not reported	T1c	Stage IIA	Breast, NOS	No	no	8500/3	C50.9	released	No	not reported	4c28ae39-3a36-5d40-a796-3085f79349ed	Breast, NOS	577	NA	stage iia	2010	20072	2019-08-08T16:27:01.852201-05:00	NA	not reported	7th	N1a	0	NA	NA	NA	NA	Not Reported	NA	8f04c200-75e6-5a55-a517-81dc6b0869ad	NA	NA	54	-20072	1956	NA	30d7b913-9bfb-5af4-9ab2-e08b72b36f4b	Alive	not hispanic or latino	female	white	NA	NA	NA	Radiation Therapy, NOS
TCGA-D8-A1JJ	Infiltrating duct carcinoma, NOS	not reported	M0	not reported	T2	Stage IIA	Breast, NOS	No	no	8500/3	C50.9	released	No	not reported	52fb0b49-e1c0-5a05-9f14-e4da28ab2331	Breast, NOS	611	NA	stage iia	2010	19966	2019-08-08T16:27:01.852201-05:00	NA	not reported	7th	N0	0	NA	NA	NA	NA	Not Reported	NA	ae276d9d-fcb9-5fbe-86b3-16d050afb822	NA	NA	54	-19966	1956	NA	8c710960-b80c-5255-867a-dea878187925	Alive	not hispanic or latino	female	white	NA	NA	NA	Radiation Therapy, NOS
TCGA-D8-A1JK	Infiltrating duct carcinoma, NOS	not reported	M0	not reported	T2	Stage IIA	Breast, NOS	No	no	8500/3	C50.9	released	No	not reported	5d25c773-caa4-5fdc-8d40-9337b2cc62fb	Breast, NOS	0	NA	stage iia	2010	32872	2019-08-08T16:27:01.852201-05:00	NA	not reported	7th	N0	0	NA	NA	NA	NA	Not Reported	NA	ae4ac120-737d-552a-aea5-a042e4a1d970	NA	NA	90	-32872	1920	NA	a8eb8c4d-bd71-570b-9511-62b85ba05652	Alive	not hispanic or latino	female	white	NA	NA	NA	Radiation Therapy, NOS
TCGA-D8-A1JL	Infiltrating duct carcinoma, NOS	not reported	M0	not reported	T2	Stage IIA	Breast, NOS	No	no	8500/3	C50.9	released	No	not reported	3e663b62-4bf1-5913-b599-ef0363207557	Breast, NOS	611	NA	stage iia	2010	26484	2019-08-08T16:27:01.852201-05:00	NA	not reported	7th	N0	0	NA	NA	NA	NA	Not Reported	NA	c69667d4-f694-5600-a176-56e8a8808805	NA	NA	72	-26484	1938	NA	64c4236f-8dd1-572d-bf8e-7a250fe53e28	Alive	not hispanic or latino	female	white	NA	NA	NA	Radiation Therapy, NOS
TCGA-D8-A1JN	Lobular carcinoma, NOS	not reported	MX	not reported	T3	Stage IIIC	Breast, NOS	No	no	8520/3	C50.9	released	No	not reported	21dc8dec-77b0-5f4c-bbed-7b2a1b6af9e9	Breast, NOS	620	NA	stage iiic	2010	29331	2019-08-08T16:27:01.852201-05:00	NA	not reported	7th	N3a	0	NA	NA	NA	NA	Not Reported	NA	47785274-4454-5591-8f5c-c9c99468adaa	NA	NA	80	-29331	1930	NA	1d534405-b0b2-5287-9eec-772863c9a546	Alive	not hispanic or latino	female	white	NA	NA	NA	Radiation Therapy, NOS
TCGA-D8-A1JP	Infiltrating duct carcinoma, NOS	not reported	M0	not reported	T1c	Stage IA	Breast, NOS	No	no	8500/3	C50.9	released	No	not reported	a2cbb74a-83d8-5a0b-bd37-42d241fe9387	Breast, NOS	639	NA	stage ia	2010	26862	2019-08-08T16:27:01.852201-05:00	NA	not reported	7th	N0	0	NA	NA	NA	NA	Not Reported	NA	5d6317ec-5944-5ea7-9a27-361381604ed6	NA	NA	73	-26862	1937	NA	abf45158-5a19-5d37-8249-af72aa78016c	Alive	not hispanic or latino	female	white	NA	NA	NA	Radiation Therapy, NOS
TCGA-D8-A1JS	Intraductal papillary adenocarcinoma with invasion	not reported	M0	not reported	T1c	Stage IA	Breast, NOS	No	no	8503/3	C50.9	released	No	not reported	850b9c76-b47e-5313-8fce-287efa324368	Breast, NOS	371	NA	stage ia	2010	28178	2019-08-08T16:27:01.852201-05:00	NA	not reported	7th	N0	0	NA	NA	NA	NA	Not Reported	NA	55e5993d-2c65-553f-bff2-2cb1ad4ab548	NA	NA	77	-28178	1933	NA	617fc1b4-c6ca-5f5a-abf7-11b5b2d84256	Alive	not hispanic or latino	female	white	NA	NA	NA	Radiation Therapy, NOS
TCGA-D8-A1JT	Infiltrating duct mixed with other types of carcinoma	not reported	M0	not reported	T2	Stage IIA	Breast, NOS	No	no	8523/3	C50.9	released	No	not reported	5e2278b0-96a1-556d-a815-2428ee3253dd	Breast, NOS	405	NA	stage iia	2010	25677	2019-08-08T16:27:01.852201-05:00	NA	not reported	7th	N0	0	NA	NA	NA	NA	Not Reported	NA	2150d9cc-8cf2-5d97-bca4-ac7fc718ed2c	NA	NA	70	-25677	1940	NA	2404b4db-143d-5af1-9e0e-0c4f2394e99e	Alive	not hispanic or latino	female	white	NA	NA	NA	Radiation Therapy, NOS
TCGA-D8-A1JU	Infiltrating duct carcinoma, NOS	not reported	M0	not reported	T1c	Stage IA	Breast, NOS	No	no	8500/3	C50.9	released	No	not reported	69a38acb-a532-5099-9182-232c63d81c58	Breast, NOS	447	NA	stage ia	2010	18733	2019-08-08T16:27:01.852201-05:00	NA	not reported	7th	N0	0	NA	NA	NA	NA	Not Reported	NA	06d3953b-686b-5250-8bcf-4df40bb52c67	NA	NA	51	-18733	1959	NA	5874e6a9-32c3-59c2-b87c-cc9dae46e50b	Alive	not hispanic or latino	female	white	NA	NA	NA	Radiation Therapy, NOS
TCGA-D8-A1X6	Infiltrating duct carcinoma, NOS	not reported	MX	not reported	T3	Stage IIIA	Breast, NOS	No	no	8500/3	C50.9	released	No	not reported	d8d5d195-cc60-51af-987d-eee55dbd12ce	Breast, NOS	541	NA	stage iiia	2010	29256	2019-08-08T16:27:33.488489-05:00	NA	not reported	7th	N2a	0	NA	NA	NA	NA	Not Reported	NA	a09440ae-b539-527b-a468-75fff4c3bfae	NA	NA	80	-29256	1930	NA	26590b1b-17b4-56a6-86bf-7d74b0d72d78	Alive	not hispanic or latino	female	white	NA	NA	NA	Radiation Therapy, NOS
TCGA-D8-A1X7	Intraductal papillary adenocarcinoma with invasion	not reported	MX	not reported	T2	Stage IIA	Breast, NOS	No	no	8503/3	C50.9	released	No	not reported	dfd22644-a256-583b-a187-494506916a70	Breast, NOS	509	NA	stage iia	2010	14858	2019-08-08T16:27:33.488489-05:00	NA	not reported	7th	N0	0	NA	NA	NA	NA	Not Reported	NA	f0e7399d-3eb2-5d88-88b5-28f8ca81efb9	NA	NA	40	-14858	1970	NA	f20f930e-7c17-5825-ae2c-ff2a0889539a	Alive	not hispanic or latino	female	white	NA	NA	NA	Radiation Therapy, NOS
TCGA-D8-A1X8	Lobular carcinoma, NOS	not reported	M0	not reported	T1c	Stage IIIA	Breast, NOS	No	no	8520/3	C50.9	released	No	not reported	41136fdd-83fe-5555-901f-fc67a119109f	Breast, NOS	783	NA	stage iiia	2010	22995	2019-08-08T16:27:33.488489-05:00	NA	not reported	7th	N2a	0	NA	NA	NA	NA	Not Reported	NA	db4d2cc0-1c50-55a1-9061-6252fd8b6d92	NA	NA	62	-22995	1948	NA	7a516c93-355b-5e9f-9fd7-b34ac146ec10	Alive	not hispanic or latino	female	white	NA	NA	NA	Radiation Therapy, NOS
TCGA-D8-A1X9	Infiltrating duct carcinoma, NOS	not reported	M0	not reported	T2	Stage IIB	Breast, NOS	No	no	8500/3	C50.9	released	No	not reported	5359e94d-2181-5400-8323-585d22482651	Breast, NOS	727	NA	stage iib	2010	24417	2019-08-08T16:27:33.488489-05:00	NA	not reported	7th	N1a	0	NA	NA	NA	NA	Not Reported	NA	2ced2308-93a3-5945-b341-3809b88fe6d0	NA	NA	66	-24417	1944	NA	c7687a86-d118-5772-983a-ba0e2f8c843d	Alive	not hispanic or latino	female	white	NA	NA	NA	Radiation Therapy, NOS
TCGA-D8-A1XA	Infiltrating duct carcinoma, NOS	not reported	M0	not reported	T1c	Stage IA	Breast, NOS	No	no	8500/3	C50.9	released	No	not reported	4d4a9689-1950-58dc-80ef-003455e5b0b3	Breast, NOS	839	NA	stage ia	2010	23387	2019-08-08T16:27:33.488489-05:00	NA	not reported	7th	N0	0	NA	NA	NA	NA	Not Reported	NA	809ebb71-5746-5895-b6c0-67072d8acd2e	NA	NA	64	-23387	1946	NA	86ac2a19-b453-5699-b300-797be289f5aa	Alive	not hispanic or latino	female	white	NA	NA	NA	Radiation Therapy, NOS
TCGA-D8-A1XB	Infiltrating duct carcinoma, NOS	not reported	M0	not reported	T2	Stage IIB	Breast, NOS	No	no	8500/3	C50.9	released	No	not reported	cf903104-269c-586f-b762-6ae19be4bb33	Breast, NOS	552	NA	stage iib	2010	22976	2019-08-08T16:27:33.488489-05:00	NA	not reported	7th	N1a	0	NA	NA	NA	NA	Not Reported	NA	57a2187f-e338-5090-82c8-abc862c2f830	NA	NA	62	-22976	1948	NA	56a89821-600e-5796-b981-1ad3af445016	Alive	not hispanic or latino	female	white	NA	NA	NA	Radiation Therapy, NOS
TCGA-D8-A1XC	Mucinous adenocarcinoma	not reported	M0	not reported	T4b	Stage IIIB	Breast, NOS	No	no	8480/3	C50.9	released	No	not reported	e9d706d6-3a9d-5f36-9593-470b97d0b3f8	Breast, NOS	81	NA	stage iiib	2010	31220	2019-08-08T16:27:33.488489-05:00	NA	not reported	7th	N1a	0	NA	NA	NA	NA	Not Reported	NA	f44b0892-452b-5bb0-b63a-e75b1ac14e6a	NA	NA	85	-31220	1925	NA	d13304fe-485f-5ad9-aab4-ee829a03170e	Dead	not hispanic or latino	female	white	377	NA	NA	Radiation Therapy, NOS
TCGA-D8-A1XD	Infiltrating duct carcinoma, NOS	not reported	M0	not reported	T1c	Stage IIIA	Breast, NOS	No	no	8500/3	C50.9	released	No	not reported	8ab446e4-a925-5a4d-8e0f-682b857b5d03	Breast, NOS	522	NA	stage iiia	2010	13510	2019-08-08T16:27:33.488489-05:00	NA	not reported	7th	N2a	0	NA	NA	NA	NA	Not Reported	NA	7d63fe84-e2fc-5f34-9494-3dde3b6a5bd5	NA	NA	36	-13510	1974	NA	48697d18-3ca4-5063-9df6-91502d1c91cf	Alive	not hispanic or latino	female	white	NA	NA	NA	Radiation Therapy, NOS
TCGA-D8-A1XF	Infiltrating duct carcinoma, NOS	not reported	M0	not reported	T2	Stage IIA	Breast, NOS	No	no	8500/3	C50.9	released	No	not reported	cc257113-b7e2-5bb3-ab3b-1d6ddf55e9b9	Breast, NOS	463	NA	stage iia	2010	16787	2019-08-08T16:27:33.488489-05:00	NA	not reported	7th	N0	0	NA	NA	NA	NA	Not Reported	NA	86e68cb6-336d-5eb7-baf8-f8490fc4ae62	NA	NA	45	-16787	1965	NA	75707164-7c3e-59c2-afe9-5c61c8c13fa2	Alive	not hispanic or latino	female	white	NA	NA	NA	Radiation Therapy, NOS
TCGA-D8-A1XG	Infiltrating duct carcinoma, NOS	not reported	M0	not reported	T4b	Stage IIIB	Breast, NOS	No	no	8500/3	C50.9	released	No	not reported	eb445629-d50e-5180-95b9-cc003b8a8854	Breast, NOS	448	NA	stage iiib	2010	31748	2019-08-08T16:27:33.488489-05:00	NA	not reported	7th	N1a	0	NA	NA	NA	NA	Not Reported	NA	d0a4a867-ebf3-5cdf-8f94-dc216be122c9	NA	NA	86	-31748	1924	NA	b30d9189-abb1-5b3c-9815-cb2edcb3bbf8	Alive	not hispanic or latino	female	white	NA	NA	NA	Radiation Therapy, NOS
TCGA-D8-A1XJ	Infiltrating duct mixed with other types of carcinoma	not reported	MX	not reported	T3	Stage IIIA	Breast, NOS	No	no	8523/3	C50.9	released	No	not reported	fb36c13e-3f83-546c-a2ff-0755b1b27e58	Breast, NOS	664	NA	stage iiia	2010	27967	2019-08-08T16:27:33.488489-05:00	NA	not reported	7th	N1a	0	NA	NA	NA	NA	Not Reported	NA	c1d7246d-338c-5158-aeac-6cd28765a38f	NA	NA	76	-27967	1934	NA	f39cf52f-75d1-5cbf-a976-76b0edc1e1dc	Alive	not hispanic or latino	female	white	NA	NA	NA	Radiation Therapy, NOS
TCGA-D8-A1XK	Infiltrating duct carcinoma, NOS	not reported	MX	not reported	T2	Stage IIB	Breast, NOS	No	no	8500/3	C50.9	released	No	not reported	21515926-12de-5440-9d4a-a12d91a85ee2	Breast, NOS	441	NA	stage iib	2010	20092	2019-08-08T16:27:33.488489-05:00	NA	not reported	7th	N1a	0	NA	NA	NA	NA	Not Reported	NA	2013b46e-3f9e-5936-8eec-a68830c05758	NA	NA	55	-20092	1955	NA	9639345c-71b4-585d-8eb6-50ec717f8fb4	Alive	not hispanic or latino	female	white	NA	NA	NA	Radiation Therapy, NOS
TCGA-D8-A1XL	Infiltrating duct carcinoma, NOS	not reported	MX	not reported	T2	Stage IIB	Breast, NOS	No	no	8500/3	C50.9	released	No	not reported	fe76751f-4b1d-5926-9fad-13bd1b759cf1	Breast, NOS	606	NA	stage iib	2010	12668	2019-08-08T16:27:33.488489-05:00	NA	not reported	7th	N1a	0	NA	NA	NA	NA	Not Reported	NA	f9bb9eb8-eeee-509f-9db1-c3eecd711b9e	NA	NA	34	-12668	1976	NA	7a24306c-f79c-58ef-927a-78972ae66478	Alive	not hispanic or latino	female	white	NA	NA	NA	Radiation Therapy, NOS
TCGA-D8-A1XM	Infiltrating duct carcinoma, NOS	not reported	M0	not reported	T1c	Stage IA	Breast, NOS	No	no	8500/3	C50.9	released	No	not reported	af7eedea-4c3f-55a8-bf89-2ae58321bd67	Breast, NOS	538	NA	stage ia	2010	21056	2019-08-08T16:27:33.488489-05:00	NA	not reported	7th	N0	0	NA	NA	NA	NA	Not Reported	NA	b5aa7945-589c-502e-848a-2cd0bbb9b4ee	NA	NA	57	-21056	1953	NA	2639c570-9e5f-5eaa-af40-c9e2ccfbe23a	Alive	not hispanic or latino	female	white	NA	NA	NA	Radiation Therapy, NOS
TCGA-D8-A1XO	Lobular carcinoma, NOS	not reported	M0	not reported	T2	Stage IIB	Breast, NOS	No	no	8520/3	C50.9	released	No	not reported	07ba7587-dff7-54c7-9cb3-9e0aa81ab889	Breast, NOS	1682	NA	stage iib	2010	20606	2019-08-08T16:27:33.488489-05:00	NA	not reported	7th	N1a	0	NA	NA	NA	NA	Not Reported	NA	6c2b8246-f220-5f97-83ff-041a60d879f6	NA	NA	56	-20606	1954	NA	94f576e1-a478-5fb4-8237-59f778a60b0a	Alive	not hispanic or latino	female	white	NA	NA	NA	Radiation Therapy, NOS
TCGA-D8-A1XQ	Infiltrating duct carcinoma, NOS	not reported	M0	not reported	T2	Stage IIA	Breast, NOS	No	no	8500/3	C50.9	released	No	not reported	2c57e411-1e59-52c1-9fc0-eb1fd9c799d7	Breast, NOS	499	NA	stage iia	2010	25345	2019-08-08T16:27:33.488489-05:00	NA	not reported	7th	N0	0	NA	NA	NA	NA	Not Reported	NA	ba0179ac-aa2b-5e13-a557-6d22b4272213	NA	NA	69	-25345	1941	NA	96b5f7f1-0524-51e9-af9e-a97da1edcb44	Alive	not hispanic or latino	female	white	NA	NA	NA	Radiation Therapy, NOS
TCGA-D8-A1XR	Infiltrating duct carcinoma, NOS	not reported	M0	not reported	T2	Stage IIB	Breast, NOS	No	no	8500/3	C50.9	released	No	not reported	c2ad71ed-3744-587d-a108-ea5f4087524d	Breast, NOS	482	NA	stage iib	2010	20488	2019-08-08T16:27:33.488489-05:00	NA	not reported	7th	N1a	0	NA	NA	NA	NA	Not Reported	NA	6dfa11dc-4266-57c9-b746-02a6c7bb9d23	NA	NA	56	-20488	1954	NA	498e27fb-2201-524a-bdd1-86f4e53dc54b	Alive	not hispanic or latino	female	white	NA	NA	NA	Radiation Therapy, NOS
TCGA-D8-A1XT	Infiltrating duct carcinoma, NOS	not reported	M0	not reported	T1c	Stage IIA	Breast, NOS	No	no	8500/3	C50.9	released	No	not reported	5ee8769d-b31d-58a2-9723-0690c769770e	Breast, NOS	506	NA	stage iia	2010	22448	2019-08-08T16:27:33.488489-05:00	NA	not reported	7th	N1a	0	NA	NA	NA	NA	Not Reported	NA	663171f8-3137-55ad-b04e-74ce9c72c39e	NA	NA	61	-22448	1949	NA	40f1369a-24d7-5565-9622-5113d6ae84a4	Alive	not hispanic or latino	female	white	NA	NA	NA	Radiation Therapy, NOS
TCGA-D8-A1XU	Infiltrating duct carcinoma, NOS	not reported	M0	not reported	T1c	Stage IA	Breast, NOS	No	no	8500/3	C50.9	released	No	not reported	535e0da6-6128-5eb3-9095-a47677f5323b	Breast, NOS	395	NA	stage ia	2010	20715	2019-08-08T16:27:33.488489-05:00	NA	not reported	7th	N0	0	NA	NA	NA	NA	Not Reported	NA	5ec9e2d6-e38e-5a21-9679-35a6958936fb	NA	NA	56	-20715	1954	NA	2d23b71d-cca7-5db8-a059-513f2e1cc323	Alive	not hispanic or latino	female	white	NA	NA	NA	Radiation Therapy, NOS
TCGA-D8-A1XV	Mucinous adenocarcinoma	not reported	M0	not reported	T2	Stage IIA	Breast, NOS	No	no	8480/3	C50.9	released	No	not reported	47afa2cf-09ad-584f-8814-b81422d96f4f	Breast, NOS	461	NA	stage iia	2010	30830	2019-08-08T16:27:33.488489-05:00	NA	not reported	7th	N0	0	NA	NA	NA	NA	Not Reported	NA	bf9ac83c-e066-5895-9c5a-782c0e10a2f4	NA	NA	84	-30830	1926	NA	49b0a1d0-5d22-5115-b864-97956f603fa3	Alive	not hispanic or latino	female	white	NA	NA	NA	Radiation Therapy, NOS
TCGA-D8-A1XY	Infiltrating duct carcinoma, NOS	not reported	MX	not reported	T2	Stage IIA	Breast, NOS	No	no	8500/3	C50.9	released	No	not reported	05b37f74-473c-58fd-adc5-1665c363d90e	Breast, NOS	503	NA	stage iia	2010	27106	2019-08-08T16:27:33.488489-05:00	NA	not reported	7th	N0	0	NA	NA	NA	NA	Not Reported	NA	bb2b5b6f-e375-590c-ac9f-ebf3c76e611d	NA	NA	74	-27106	1936	NA	cec6dece-e3af-55d6-b48c-151c58b09a93	Alive	not hispanic or latino	female	white	NA	NA	NA	Radiation Therapy, NOS
TCGA-D8-A1XZ	Infiltrating duct carcinoma, NOS	not reported	MX	not reported	T1c	Stage IIIA	Breast, NOS	No	no	8500/3	C50.9	released	No	not reported	ac9d764e-c5c8-5955-8d0c-bb3cce9c86b8	Breast, NOS	466	NA	stage iiia	2010	29916	2019-08-08T16:27:33.488489-05:00	NA	not reported	7th	N2a	0	NA	NA	NA	NA	Not Reported	NA	3c7b09bc-9e32-5d9d-b356-3b5fd839ab70	NA	NA	81	-29916	1929	NA	dc207888-7ec9-5e7f-b06c-be9f88e002ce	Alive	not hispanic or latino	female	white	NA	NA	NA	Radiation Therapy, NOS
TCGA-D8-A1Y0	Infiltrating duct carcinoma, NOS	not reported	MX	not reported	T1c	Stage IIIA	Breast, NOS	No	no	8500/3	C50.9	released	No	not reported	4e148d79-708e-5a92-af09-cc0cfb34cf3e	Breast, NOS	472	NA	stage iiia	2010	24083	2019-08-08T16:27:33.488489-05:00	NA	not reported	7th	N2a	0	NA	NA	NA	NA	Not Reported	NA	6c3ec328-07eb-5f54-887c-aa3a54eda911	NA	NA	65	-24083	1945	NA	3c0bf4b1-8a3f-5bf7-befe-cda37a7a2e1b	Alive	not hispanic or latino	female	white	NA	NA	NA	Radiation Therapy, NOS
TCGA-D8-A1Y1	Infiltrating duct carcinoma, NOS	not reported	MX	not reported	T3	Stage IIIA	Breast, NOS	No	no	8500/3	C50.9	released	No	not reported	169d45c0-608c-56ff-ad4e-7e1e10c171bb	Breast, NOS	116	NA	stage iiia	2010	29474	2019-08-08T16:27:33.488489-05:00	NA	not reported	7th	N1a	0	NA	NA	NA	NA	Not Reported	NA	5f15f152-d178-54d4-8413-ca35e8724610	NA	NA	80	-29474	1930	NA	2b64c683-03f0-5e5a-8209-801db99b9233	Dead	not hispanic or latino	female	white	302	NA	NA	Radiation Therapy, NOS
TCGA-D8-A1Y2	Infiltrating duct carcinoma, NOS	not reported	MX	not reported	T2	Stage IIA	Breast, NOS	No	no	8500/3	C50.9	released	No	not reported	a39e1918-7a40-50c0-9f22-dc2d3142da84	Breast, NOS	433	NA	stage iia	2011	26021	2019-08-08T16:27:33.488489-05:00	NA	not reported	7th	N0	0	NA	NA	NA	NA	Not Reported	NA	50505a02-0645-5110-918c-385e1f8680fb	NA	NA	71	-26021	1940	NA	91ac1a56-b19e-5cc8-809e-be4aa26e6150	Alive	not hispanic or latino	female	white	NA	NA	NA	Radiation Therapy, NOS
TCGA-D8-A27E	Infiltrating duct mixed with other types of carcinoma	not reported	M0	not reported	T1c	Stage IA	Breast, NOS	No	no	8523/3	C50.9	released	No	not reported	2bdd0dbc-c2cc-5b67-bb3b-4e7eeac079df	Breast, NOS	530	NA	stage ia	2010	24315	2019-08-08T16:27:33.488489-05:00	NA	not reported	7th	N0	0	NA	NA	NA	NA	Not Reported	NA	6bb6a057-1639-5d5d-a016-46a0d2f2a601	NA	NA	66	-24315	1944	NA	64b3a1b7-b7e5-50b0-9ca3-12949625c39c	Alive	not hispanic or latino	female	white	NA	NA	NA	Radiation Therapy, NOS
TCGA-D8-A27F	Infiltrating duct carcinoma, NOS	not reported	M0	not reported	T2	Stage IIA	Breast, NOS	No	no	8500/3	C50.9	released	No	not reported	360ed423-d56a-5986-b3ed-2a148606addb	Breast, NOS	488	NA	stage iia	2010	14731	2019-08-08T16:27:33.488489-05:00	NA	not reported	7th	N0	0	NA	NA	NA	NA	Not Reported	NA	2208fdb4-e57a-541c-968b-56cfab5e6faf	NA	NA	40	-14731	1970	NA	a2b2b8e5-ba68-51e0-aa9b-7d6434094d24	Alive	not hispanic or latino	female	white	NA	NA	NA	Radiation Therapy, NOS
TCGA-D8-A27H	Infiltrating duct carcinoma, NOS	not reported	M0	not reported	T2	Stage IIA	Breast, NOS	No	no	8500/3	C50.9	released	No	not reported	6f3b9cd0-90ce-5fab-9b29-e3449aa29ba9	Breast, NOS	397	NA	stage iia	2011	26588	2019-08-08T16:27:33.488489-05:00	NA	not reported	7th	N0	0	NA	NA	NA	NA	Not Reported	NA	37ec68ce-d69a-598f-8d20-dedd23248f45	NA	NA	72	-26588	1939	NA	578b7cbc-7290-5ff7-9913-fb547be0ee72	Alive	not hispanic or latino	female	white	NA	NA	NA	Radiation Therapy, NOS
TCGA-D8-A27I	Lobular carcinoma, NOS	not reported	M0	not reported	T1c	Stage IIIA	Breast, NOS	No	no	8520/3	C50.9	released	No	not reported	067e4e69-7956-56b4-9a84-c15b41602629	Breast, NOS	439	NA	stage iiia	2010	21327	2019-08-08T16:27:33.488489-05:00	NA	not reported	7th	N2a	0	NA	NA	NA	NA	Not Reported	NA	7d1dbe88-a180-51e2-81ba-7ca1f60dddd3	NA	NA	58	-21327	1952	NA	43fb7482-70e1-5066-a48b-346ae44f51a8	Alive	not hispanic or latino	female	white	NA	NA	NA	Radiation Therapy, NOS
TCGA-D8-A27K	Infiltrating duct carcinoma, NOS	not reported	M0	not reported	T2	Stage IIB	Breast, NOS	No	no	8500/3	C50.9	released	No	not reported	e0f9d2a7-0d44-56b3-8b93-09d5b20ba2f5	Breast, NOS	1461	NA	stage iib	2011	17426	2019-08-08T16:27:33.488489-05:00	NA	not reported	7th	N1a	0	NA	NA	NA	NA	Not Reported	NA	bfe398b0-7f1e-54e0-93d4-026602b4aecb	NA	NA	47	-17426	1964	NA	ac388033-5f7d-5e43-a2c0-afdedd399d5f	Alive	not hispanic or latino	female	white	NA	NA	NA	Radiation Therapy, NOS
TCGA-D8-A27L	Infiltrating duct carcinoma, NOS	not reported	M0	not reported	T1c	Stage IIIA	Breast, NOS	No	no	8500/3	C50.9	released	No	not reported	1833e933-8075-51a9-8a20-1f9cba8a0b9b	Breast, NOS	499	NA	stage iiia	2011	18025	2019-08-08T16:27:33.488489-05:00	NA	not reported	7th	N2a	0	NA	NA	NA	NA	Not Reported	NA	7391c7cb-0406-52cc-bad5-055288890f6f	NA	NA	49	-18025	1962	NA	97ef1a05-514a-5adf-9ddf-28e117b1424e	Alive	not hispanic or latino	female	white	NA	NA	NA	Radiation Therapy, NOS
TCGA-D8-A27M	Infiltrating duct carcinoma, NOS	not reported	M0	not reported	T1c	Stage IA	Breast, NOS	No	no	8500/3	C50.9	released	No	not reported	4daf3c3e-d61e-5926-8856-b4f3620c08a5	Breast, NOS	410	NA	stage ia	2011	21910	2019-08-08T16:27:33.488489-05:00	NA	not reported	7th	N0	0	NA	NA	NA	NA	Not Reported	NA	71df0a79-5e11-5d08-b6a7-b5fe136e1d1f	NA	NA	59	-21910	1952	NA	e08c7da9-1eea-5b46-87e2-a0192b957588	Alive	not hispanic or latino	female	white	NA	NA	NA	Radiation Therapy, NOS
TCGA-D8-A27N	Infiltrating duct carcinoma, NOS	not reported	M0	not reported	T2	Stage IIIA	Breast, NOS	No	no	8500/3	C50.9	released	No	not reported	51ebe88c-ac20-515f-b73f-957e3eab0d01	Breast, NOS	519	NA	stage iiia	2011	13243	2019-08-08T16:27:33.488489-05:00	NA	not reported	7th	N2a	0	NA	NA	NA	NA	Not Reported	NA	f2e19501-2637-552e-93cb-00610b8a1403	NA	NA	36	-13243	1975	NA	1e1afe4c-f99b-518e-b892-c517208e52a8	Alive	not hispanic or latino	female	white	NA	NA	NA	Radiation Therapy, NOS
TCGA-D8-A27P	Infiltrating duct carcinoma, NOS	not reported	M0	not reported	T1c	Stage IA	Breast, NOS	No	no	8500/3	C50.9	released	No	not reported	0752b45e-d9ff-5c62-b668-5f9df36c4d72	Breast, NOS	49	NA	stage ia	2011	23576	2019-08-08T16:27:33.488489-05:00	NA	not reported	7th	N0	0	NA	NA	NA	NA	Not Reported	NA	4bba0155-bf31-536a-af26-d26d27fea341	NA	NA	64	-23576	1947	NA	5ab7c344-33a3-5f21-9cb1-bc4f17e6c35e	Alive	not hispanic or latino	female	white	NA	NA	NA	Radiation Therapy, NOS
TCGA-D8-A27R	Infiltrating duct carcinoma, NOS	not reported	M0	not reported	T2	Stage IIIC	Breast, NOS	No	no	8500/3	C50.9	released	No	not reported	7177d591-765a-50e4-a74f-6164628f9720	Breast, NOS	307	NA	stage iiic	2011	15122	2019-08-08T16:27:33.488489-05:00	NA	not reported	7th	N3a	0	NA	NA	NA	NA	Not Reported	NA	9bf70e2f-bd30-5073-ac83-3c795e7be3df	NA	NA	41	-15122	1970	NA	bf937ea0-a548-5484-9faf-218e1e94db5f	Alive	not hispanic or latino	female	white	NA	NA	NA	Radiation Therapy, NOS
TCGA-D8-A27T	Lobular carcinoma, NOS	not reported	M0	not reported	T2	Stage IIIC	Breast, NOS	No	no	8520/3	C50.9	released	No	not reported	2c997b05-e4ff-515b-a410-c7fe8e241d27	Breast, NOS	398	NA	stage iiic	2011	19591	2019-08-08T16:27:33.488489-05:00	NA	not reported	7th	N3a	0	NA	NA	NA	NA	Not Reported	NA	c413798f-c937-5236-9a5a-427394ad25c1	NA	NA	53	-19591	1958	NA	5e15c0fd-f158-531e-9707-462ebe3ef42a	Alive	not hispanic or latino	female	white	NA	NA	NA	Radiation Therapy, NOS
TCGA-D8-A27V	Lobular carcinoma, NOS	not reported	M0	not reported	T2	Stage IIA	Breast, NOS	No	no	8520/3	C50.9	released	No	not reported	ef029bdc-5b7f-54d5-98ef-ad432f89d22e	Breast, NOS	381	NA	stage iia	2011	22958	2019-08-08T16:27:33.488489-05:00	NA	not reported	7th	N0	0	NA	NA	NA	NA	Not Reported	NA	6178b4fa-7a2f-5a6b-b36d-c7d751a863a7	NA	NA	62	-22958	1949	NA	f2398bfc-eda7-56d9-b009-b60bf3108d19	Alive	not hispanic or latino	female	white	NA	NA	NA	Radiation Therapy, NOS
TCGA-D8-A27W	Mucinous adenocarcinoma	not reported	M0	not reported	T4b	Stage IIIB	Breast, NOS	No	no	8480/3	C50.9	released	No	not reported	29fb067a-735f-5017-9013-dc3751683ef8	Breast, NOS	373	NA	stage iiib	2011	20173	2019-08-08T16:27:33.488489-05:00	NA	not reported	7th	N0	0	NA	NA	NA	NA	Not Reported	NA	4fb385dd-c9d3-5088-bf97-4b23e73bd3da	NA	NA	55	-20173	1956	NA	d9ddff83-d9eb-5c61-aa70-35c33be00005	Alive	not hispanic or latino	female	white	NA	NA	NA	Radiation Therapy, NOS
TCGA-D8-A3Z5	Lobular carcinoma, NOS	not reported	M0	not reported	T2	Stage IIIC	Breast, NOS	No	no	8520/3	C50.9	released	No	not reported	f79d5cda-f402-5308-acaf-82df96de2a91	Breast, NOS	1015	NA	stage iiic	2011	19846	2019-08-08T16:27:33.488489-05:00	NA	not reported	7th	N3a	0	NA	NA	NA	NA	Not Reported	NA	e765230d-a817-5ad0-8710-eeb92889f5ec	NA	NA	54	-19846	1957	NA	860076ed-af0a-5646-928c-3cc3dfed4a8b	Alive	not hispanic or latino	female	white	NA	NA	NA	Radiation Therapy, NOS
TCGA-D8-A3Z6	Lobular carcinoma, NOS	not reported	M0	not reported	T3	Stage IIIC	Breast, NOS	No	no	8520/3	C50.9	released	No	not reported	76481a42-805c-5d17-b86c-3b63a0496ff2	Breast, NOS	563	NA	stage iiic	2011	20629	2019-08-08T16:27:33.488489-05:00	NA	not reported	7th	N3a	0	NA	NA	NA	NA	Not Reported	NA	945f8013-6ad1-52e5-8707-69345ebc127f	NA	NA	56	-20629	1955	NA	7d89b15c-687c-50cc-bb33-1cd094e68e58	Alive	not hispanic or latino	female	white	NA	NA	NA	Radiation Therapy, NOS
TCGA-D8-A4Z1	Lobular carcinoma, NOS	not reported	M0	not reported	T1c	Stage IA	Breast, NOS	No	no	8520/3	C50.9	released	No	not reported	1f4f0caa-ff96-50df-a43a-6d4ca4e01795	Breast, NOS	659	NA	stage ia	2012	25097	2019-08-08T16:27:33.488489-05:00	NA	not reported	7th	N0	0	NA	NA	NA	NA	Not Reported	NA	f401ee98-189b-50de-9107-9322009d7d67	NA	NA	68	-25097	1944	NA	74a9da67-b449-52b4-9b5c-ef7066361bdb	Alive	not hispanic or latino	female	white	NA	NA	NA	Radiation Therapy, NOS
TCGA-D8-A73U	Lobular carcinoma, NOS	not reported	M0	not reported	T2	Stage IIA	Breast, NOS	No	no	8520/3	C50.9	released	No	not reported	db3efa07-95cf-541d-8f9b-4593d10c8367	Breast, NOS	492	NA	stage iia	2012	32208	2019-08-08T16:27:33.488489-05:00	NA	not reported	7th	N0	0	NA	NA	NA	NA	Not Reported	NA	9df3a6ee-ddf4-5cbf-9d0e-5f5d962c0343	NA	NA	88	-32208	1924	NA	05725d4f-7d1c-595a-9716-45eaf4e92c38	Alive	not hispanic or latino	female	white	NA	NA	NA	Radiation Therapy, NOS
TCGA-D8-A73W	Mucinous adenocarcinoma	not reported	MX	not reported	T3	Stage IIIA	Breast, NOS	No	no	8480/3	C50.9	released	No	not reported	9fdf82e3-ea93-5884-a9b4-2f64e86ac164	Breast, NOS	244	NA	stage iiia	2013	29125	2019-08-08T16:27:33.488489-05:00	NA	not reported	7th	N1a	0	NA	NA	NA	NA	Not Reported	NA	d1617fb8-6a1f-5760-a188-f0c4743484f9	NA	NA	79	-29125	1934	NA	83d1175c-7e98-55c1-9038-1aafa219ad61	Dead	not hispanic or latino	female	white	385	NA	NA	Radiation Therapy, NOS
TCGA-D8-A73X	Tubular adenocarcinoma	not reported	M0	not reported	T2	Stage IIA	Breast, NOS	No	no	8211/3	C50.9	released	No	not reported	868dd7f0-5fec-5b62-bf19-012054dcdfca	Breast, NOS	767	NA	stage iia	2013	19607	2019-08-08T16:27:33.488489-05:00	NA	not reported	7th	N0	0	NA	NA	NA	NA	Not Reported	NA	2c3134b5-0c38-5a5b-be86-fe166f8ccc86	NA	NA	53	-19607	1960	NA	36834ea6-21bd-5d7d-93fe-7b7575d6a26b	Alive	not hispanic or latino	female	white	NA	NA	NA	Radiation Therapy, NOS
TCGA-E2-A105	Infiltrating duct carcinoma, NOS	not reported	M0	not reported	T2	Stage IIA	Breast, NOS	No	no	8500/3	C50.9	released	No	not reported	d217a297-0bf7-5255-ae92-714b9cfc9196	Breast, NOS	1308	NA	stage iia	2007	28855	2019-08-08T16:27:33.488489-05:00	NA	not reported	6th	N0 (i-)	0	NA	NA	NA	NA	Not Reported	NA	21dccb3b-842d-5995-8751-e3146d82ac50	NA	NA	79	-28855	1928	NA	7fc08ea9-7ef9-518a-8878-da2bfe0e23ef	Alive	not hispanic or latino	female	white	NA	NA	NA	Radiation Therapy, NOS
TCGA-E2-A106	Infiltrating duct carcinoma, NOS	not reported	M0	not reported	T1c	Stage IB	Breast, NOS	No	no	8500/3	C50.9	released	No	not reported	69741182-bb08-5888-acb1-fa7418277d74	Breast, NOS	2541	NA	stage ib	2006	12528	2019-08-08T16:27:33.488489-05:00	NA	not reported	NA	N1mi	0	NA	NA	NA	NA	Not Reported	NA	3cd3d9ad-bef5-59b1-ad76-9225748c40d3	NA	NA	34	-12528	1972	NA	94765550-75b4-525c-91d9-31c3361954c4	Alive	not hispanic or latino	female	asian	NA	NA	NA	Radiation Therapy, NOS
TCGA-E2-A107	Lobular carcinoma, NOS	not reported	M0	not reported	T3	Stage IIIA	Breast, NOS	No	no	8520/3	C50.9	released	No	not reported	4f09667c-184f-5438-9cec-e9f3c77b12d1	Breast, NOS	1047	NA	stage iiia	2008	20065	2019-08-08T16:28:03.729574-05:00	NA	not reported	6th	N2a	0	NA	NA	NA	NA	Not Reported	NA	38eed29d-b5ec-5f12-a0fc-7e675b62b32d	NA	NA	54	-20065	1954	NA	e70814c8-5b5c-5f2c-bdbe-a75e5d174ccd	Alive	not hispanic or latino	female	white	NA	NA	NA	Radiation Therapy, NOS
TCGA-E2-A109	Infiltrating duct carcinoma, NOS	not reported	M0	not reported	T2	Stage IIA	Breast, NOS	No	no	8500/3	C50.9	released	No	not reported	ea947042-2dd9-5eef-8561-1998a816cffe	Breast, NOS	1417	NA	stage iia	2007	23521	2019-08-08T16:28:03.729574-05:00	NA	not reported	6th	N0 (i-)	0	NA	NA	NA	NA	Not Reported	NA	608e628f-e3dc-5eb3-ab1a-3da4abf81825	NA	NA	64	-23521	1943	NA	a13f044e-f6ae-59e8-bf20-2e92daa2940a	Alive	not hispanic or latino	female	white	NA	NA	NA	Radiation Therapy, NOS
TCGA-E2-A10B	Infiltrating duct carcinoma, NOS	not reported	M0	not reported	T2	Stage IIB	Breast, NOS	No	no	8500/3	C50.9	released	No	not reported	c0c7b665-b71b-5ae8-8b59-d479d69430da	Breast, NOS	1141	NA	stage iib	2007	24577	2019-08-08T16:28:03.729574-05:00	NA	not reported	6th	N1a	0	NA	NA	NA	NA	Not Reported	NA	1ffa2bc1-e06b-5a82-8aa5-b4aa7c2dbaa9	NA	NA	67	-24577	1940	NA	0d606ffe-c0c0-5cdd-ac83-88590a2a3bf5	Alive	not hispanic or latino	female	white	NA	NA	NA	Radiation Therapy, NOS
TCGA-E2-A10C	Infiltrating duct carcinoma, NOS	not reported	M0	not reported	T2	Stage IIB	Breast, NOS	No	no	8500/3	C50.9	released	No	not reported	967275ef-b789-58a5-8940-ff9caffdda52	Breast, NOS	1220	NA	stage iib	2008	19849	2019-08-08T16:28:03.729574-05:00	NA	not reported	6th	N1a	0	NA	NA	NA	NA	Not Reported	NA	0ad555ca-b89e-5923-a067-93259a7211e3	NA	NA	54	-19849	1954	NA	ea7e62b0-9080-539f-96ed-d4e5692bbfd8	Alive	not hispanic or latino	female	white	NA	NA	NA	Radiation Therapy, NOS
TCGA-E2-A10E	Infiltrating duct carcinoma, NOS	not reported	M0	not reported	T1c	Stage IIA	Breast, NOS	No	no	8500/3	C50.9	released	No	not reported	814b1370-f2f3-5938-9f3f-48b55752f345	Breast, NOS	865	NA	stage iia	2008	23684	2019-08-08T16:28:03.729574-05:00	NA	not reported	6th	N1a	0	NA	NA	NA	NA	Not Reported	NA	fc7d6b40-1137-55d7-8c6a-50e776384073	NA	NA	64	-23684	1944	NA	c6df78b7-f80f-5f2b-ad5f-8efb396d9cf3	Alive	not hispanic or latino	female	white	NA	NA	NA	Radiation Therapy, NOS
TCGA-E2-A10F	Lobular carcinoma, NOS	not reported	M0	not reported	T2	Stage IIA	Breast, NOS	No	no	8520/3	C50.9	released	No	not reported	dee6ae30-0207-5031-85e3-3bbe96e39829	Breast, NOS	878	NA	stage iia	2008	17257	2019-08-08T16:28:03.729574-05:00	NA	not reported	6th	N0 (i-)	0	NA	NA	NA	NA	Not Reported	NA	d80323b9-334d-5b5e-bb54-19d4d75e9f79	NA	NA	47	-17257	1961	NA	b7047201-6762-50fd-b0c7-b280cefc32c5	Alive	not hispanic or latino	female	white	NA	NA	NA	Radiation Therapy, NOS
TCGA-E2-A14N	Infiltrating duct carcinoma, NOS	not reported	M0	not reported	T2	Stage IIB	Breast, NOS	No	no	8500/3	C50.9	released	No	not reported	c66984a0-c6a6-5952-845d-297dccb65102	Breast, NOS	1434	NA	stage iib	2007	13743	2019-08-08T16:28:03.729574-05:00	NA	not reported	6th	N1	0	NA	NA	NA	NA	Not Reported	NA	92cdd5a5-faee-5e12-8c89-bf3f09c53c1a	NA	NA	37	-13743	1970	NA	a1a4b74d-52c4-57bc-8e5f-cd40dfa8ef75	Alive	not hispanic or latino	female	white	NA	NA	NA	Radiation Therapy, NOS
TCGA-E2-A14U	Lobular carcinoma, NOS	not reported	M0	not reported	T1c	Stage I	Breast, NOS	No	no	8520/3	C50.9	released	No	not reported	a3b21206-04bc-5c0c-a3d5-8ae036b5b869	Breast, NOS	1318	NA	stage i	2008	27389	2019-08-08T16:28:03.729574-05:00	NA	not reported	6th	N0	0	NA	NA	NA	NA	Not Reported	NA	6b959e8f-12c1-5ac0-9c3e-52e0218d3630	NA	NA	74	-27389	1934	NA	fd20b101-f9cd-5b7c-be40-b3645c4bd774	Alive	not hispanic or latino	female	white	NA	NA	NA	Radiation Therapy, NOS
TCGA-E2-A15I	Infiltrating duct carcinoma, NOS	not reported	M0	not reported	T2	Stage IIA	Breast, NOS	No	no	8500/3	C50.9	released	No	not reported	2c1064d8-64d7-5fc7-aa57-a6a58e08f896	Breast, NOS	1692	NA	stage iia	2009	16163	2019-08-08T16:28:03.729574-05:00	NA	not reported	6th	N0	0	NA	NA	NA	NA	Not Reported	NA	ca64b6e1-64d7-568a-988c-955d2b9713bf	NA	NA	44	-16163	1965	NA	8105efa4-faf9-5007-8bd4-9dca9abf8b44	Alive	not hispanic or latino	female	white	NA	NA	NA	Radiation Therapy, NOS
TCGA-E2-A15J	Infiltrating duct carcinoma, NOS	not reported	M0	not reported	T1c	Stage I	Breast, NOS	No	no	8500/3	C50.9	released	No	not reported	ab4e5a98-680a-5de3-a350-2b92d7635a61	Breast, NOS	1640	NA	stage i	2009	18771	2019-08-08T16:28:03.729574-05:00	NA	not reported	6th	N0	0	NA	NA	NA	NA	Not Reported	NA	23e55fa3-557e-5afd-b09e-0c38e8b978ef	NA	NA	51	-18771	1958	NA	e43d43c8-9d29-58ce-865b-cc5eefe13814	Alive	not hispanic or latino	female	white	NA	NA	NA	Radiation Therapy, NOS
TCGA-E2-A15K	Infiltrating duct carcinoma, NOS	not reported	M0	not reported	T2	Stage IIB	Breast, NOS	No	no	8500/3	C50.9	released	No	not reported	f2054857-b092-5626-895d-e94feaeea6a8	Breast, NOS	275	NA	stage iib	2010	21514	2019-08-08T16:28:03.729574-05:00	NA	not reported	7th	N1a	0	NA	NA	NA	NA	Not Reported	NA	b49aa227-96b1-5ecc-9778-3b681a78639a	NA	NA	58	-21514	1952	NA	94722458-0df7-55bc-8965-0b44947c71c4	Alive	not hispanic or latino	female	white	NA	NA	NA	Radiation Therapy, NOS
TCGA-E2-A1AZ	Infiltrating duct carcinoma, NOS	not reported	M0	not reported	T2	Stage IIB	Breast, NOS	No	no	8500/3	C50.9	released	No	not reported	11be3f73-e127-5958-819f-5703a64c7a1e	Breast, NOS	2329	NA	stage iib	2004	23230	2019-08-08T16:28:03.729574-05:00	NA	not reported	6th	N1a	0	NA	NA	NA	NA	Not Reported	NA	5f8ab995-75e3-504f-be8e-ed93a1ca9876	NA	NA	63	-23230	1941	NA	be993b54-a455-5e65-8e12-8940517606ba	Alive	hispanic or latino	female	white	NA	NA	NA	Radiation Therapy, NOS
TCGA-E2-A1B0	Infiltrating duct carcinoma, NOS	not reported	M0	not reported	T2	Stage IIIA	Breast, NOS	No	no	8500/3	C50.9	released	No	not reported	eb9daa2a-6388-52eb-af40-ee53a985191e	Breast, NOS	1631	NA	stage iiia	2007	18346	2019-08-08T16:28:03.729574-05:00	NA	not reported	6th	N2	0	NA	NA	NA	NA	Not Reported	NA	9826c59c-a88f-58d2-975a-cd2b2e786790	NA	NA	50	-18346	1957	NA	452b33a8-4f84-5bc7-a3bf-511955b05bcd	Alive	not hispanic or latino	female	white	NA	NA	NA	Radiation Therapy, NOS
TCGA-E2-A1B1	Infiltrating duct carcinoma, NOS	not reported	M0	not reported	T2	Stage IIB	Breast, NOS	No	no	8500/3	C50.9	released	No	not reported	691b718c-8815-516e-87de-8c900021bc92	Breast, NOS	2653	NA	stage iib	2007	16603	2019-08-08T16:28:03.729574-05:00	NA	not reported	6th	N1	0	NA	NA	NA	NA	Not Reported	NA	935b363d-0611-5dca-9302-6441ab689b70	NA	NA	45	-16603	1962	NA	bd532a10-045f-5ae4-8175-f46be5f826b9	Alive	not hispanic or latino	female	white	NA	NA	NA	Radiation Therapy, NOS
TCGA-E2-A1B4	Infiltrating duct carcinoma, NOS	not reported	M0	not reported	T1c	Stage IIIA	Breast, NOS	No	no	8500/3	C50.9	released	No	not reported	430922c0-2221-521e-9090-071449e1885c	Breast, NOS	911	NA	stage iiia	2008	27241	2019-08-08T16:28:03.729574-05:00	NA	not reported	6th	N2a	0	NA	NA	NA	NA	Not Reported	NA	f3185329-3945-5fb6-9fe2-92d6044cc891	NA	NA	74	-27241	1934	NA	7122aec7-db6d-5def-812c-ab8ffa0b8b3f	Dead	not hispanic or latino	female	white	1004	NA	NA	Radiation Therapy, NOS
TCGA-E2-A1B5	Lobular carcinoma, NOS	not reported	M0	not reported	T2	Stage IIA	Breast, NOS	No	no	8520/3	C50.9	released	No	not reported	c234c3f6-3448-50a3-9b31-dbd81ab8739d	Breast, NOS	984	NA	stage iia	2008	17039	2019-08-08T16:28:29.970921-05:00	NA	not reported	6th	N0	0	NA	NA	NA	NA	Not Reported	NA	7c3d2114-8da8-5c5a-8dd9-56e16a3c228f	NA	NA	46	-17039	1962	NA	069b8e0e-effe-57a2-80d4-34e22430a7da	Alive	not hispanic or latino	female	white	NA	NA	NA	Radiation Therapy, NOS
TCGA-E2-A1B6	Infiltrating duct carcinoma, NOS	not reported	M0	not reported	T2	Stage IIA	Breast, NOS	No	no	8500/3	C50.9	released	No	not reported	4b4b234a-8e1a-5325-b022-2d9a4be53c16	Breast, NOS	867	NA	stage iia	2008	16370	2019-08-08T16:28:29.970921-05:00	NA	not reported	6th	N0	0	NA	NA	NA	NA	Not Reported	NA	8686ecb0-acac-5545-9353-0ec0bf13aeff	NA	NA	44	-16370	1964	NA	2044593c-c6e7-5791-a5fb-d29f0f3d94d1	Alive	not hispanic or latino	female	white	NA	NA	NA	Radiation Therapy, NOS
TCGA-E2-A1BC	Infiltrating lobular mixed with other types of carcinoma	not reported	M0	not reported	T1c	Stage IA	Breast, NOS	No	yes	8524/3	C50.9	released	Not Reported	not reported	613a34d8-4605-55a0-819d-ecf19ec2c759	Breast, NOS	501	NA	stage ia	2010	23168	2019-08-08T16:28:29.970921-05:00	NA	not reported	7th	N0	0	NA	NA	NA	NA	Not Reported	NA	2274c3ff-6c2d-5532-bae7-647f381135b1	NA	NA	63	-23168	1947	NA	8dcc784d-5f07-5406-9dc9-04c8336d0947	Alive	not reported	female	not reported	NA	NA	NA	Radiation Therapy, NOS
TCGA-E2-A1BD	Infiltrating duct carcinoma, NOS	not reported	M0	not reported	T2	Stage IIA	Breast, NOS	No	no	8500/3	C50.9	released	No	not reported	a926d75e-ca77-597a-94fe-fe6b463e74ef	Breast, NOS	1133	NA	stage iia	2010	19627	2019-08-08T16:28:29.970921-05:00	NA	not reported	7th	N0	0	NA	NA	NA	NA	Not Reported	NA	f8f642b3-61c6-5257-97a3-6370f627635d	NA	NA	53	-19627	1957	NA	24284c9f-0b20-5d67-9fdc-77033180732a	Alive	not hispanic or latino	female	white	NA	NA	NA	Radiation Therapy, NOS
TCGA-E2-A1IE	Infiltrating duct carcinoma, NOS	not reported	M0	not reported	T2	Stage IIB	Breast, NOS	No	no	8500/3	C50.9	released	No	not reported	c8046eaf-a466-5998-b5c8-68d9bc4be1d8	Breast, NOS	2362	NA	stage iib	2008	22510	2019-08-08T16:28:29.970921-05:00	NA	not reported	6th	N1	0	NA	NA	NA	NA	Not Reported	NA	f83ccc24-10bc-5148-87b9-3fc862895b8b	NA	NA	61	-22510	1947	NA	8fc01126-7e84-5fe8-91c5-b04d6cbdc9b1	Alive	not hispanic or latino	female	white	NA	NA	NA	Radiation Therapy, NOS
TCGA-E2-A1IF	Infiltrating duct carcinoma, NOS	not reported	M0	not reported	T1c	Stage I	Breast, NOS	No	no	8500/3	C50.9	released	No	not reported	dde7d015-4241-51f9-8cc2-ee97be3f80d5	Breast, NOS	1138	NA	stage i	2008	27341	2019-08-08T16:28:29.970921-05:00	NA	not reported	6th	N0	0	NA	NA	NA	NA	Not Reported	NA	a7da0744-c386-5dad-af4a-6d993e50c6b4	NA	NA	74	-27341	1934	NA	a7e2f441-48c6-5d79-a8c5-f8398397fd93	Alive	not hispanic or latino	female	white	NA	NA	NA	Radiation Therapy, NOS
TCGA-E2-A1IG	Infiltrating duct carcinoma, NOS	not reported	M0	not reported	T2	Stage IIB	Breast, NOS	No	no	8500/3	C50.9	released	No	not reported	0db594f4-ffae-5684-9089-8f653a2bd595	Breast, NOS	2140	NA	stage iib	2009	16757	2019-08-08T16:28:29.970921-05:00	NA	not reported	6th	N1mi	0	NA	NA	NA	NA	Not Reported	NA	b957fcf9-11d1-549d-aaf8-3428349b89ef	NA	NA	45	-16757	1964	NA	48176deb-f92e-54fa-af1e-8939ed46c03e	Alive	not hispanic or latino	female	white	NA	NA	NA	Radiation Therapy, NOS
TCGA-E2-A1IH	Lobular carcinoma, NOS	not reported	M0	not reported	T1c	Stage I	Breast, NOS	No	no	8520/3	C50.9	released	No	not reported	e8e92100-e1c9-5d93-b7a1-5aaeb72bca0c	Breast, NOS	1026	NA	stage i	2008	29444	2019-08-08T16:28:29.970921-05:00	NA	not reported	6th	N0	0	NA	NA	NA	NA	Not Reported	NA	a3daea48-db39-562c-8e1a-420225c72579	NA	NA	80	-29444	1928	NA	1c26cb20-fe05-5765-a39e-c63f3efff530	Alive	not hispanic or latino	female	white	NA	NA	NA	Radiation Therapy, NOS
TCGA-E2-A1II	Infiltrating duct carcinoma, NOS	not reported	M0	not reported	T1c	Stage I	Breast, NOS	No	no	8500/3	C50.9	released	No	not reported	f097dc00-b3d1-54be-8fbc-894126cab77f	Breast, NOS	1025	NA	stage i	2008	18788	2019-08-08T16:28:29.970921-05:00	NA	not reported	6th	N0	0	NA	NA	NA	NA	Not Reported	NA	3c709aae-50a7-5d9e-be9f-a4e241d4dcee	NA	NA	51	-18788	1957	NA	05ece724-4c47-54a6-91cf-f429e8372e6d	Alive	not hispanic or latino	female	white	NA	NA	NA	Radiation Therapy, NOS
TCGA-E2-A1IJ	Lobular carcinoma, NOS	not reported	M0	not reported	T1c	Stage I	Breast, NOS	No	no	8520/3	C50.9	released	No	not reported	1a64453a-09de-500f-a97a-945bf7cb6a56	Breast, NOS	865	NA	stage i	2009	20956	2019-08-08T16:28:29.970921-05:00	NA	not reported	6th	N0	0	NA	NA	NA	NA	Not Reported	NA	8324d3e8-2726-53c3-9d9c-87bdd9ae9478	NA	NA	57	-20956	1952	NA	129f9479-9fe2-57d2-8259-edcbfaf7e1d5	Alive	not hispanic or latino	female	white	NA	NA	NA	Radiation Therapy, NOS
TCGA-E2-A1IK	Infiltrating duct carcinoma, NOS	not reported	M0	not reported	T1c	Stage IIA	Breast, NOS	No	no	8500/3	C50.9	released	No	not reported	0b8bc678-1bc1-52f2-bf5d-3afedea8d9ae	Breast, NOS	1800	NA	stage iia	2009	26052	2019-08-08T16:28:29.970921-05:00	NA	not reported	6th	N1mi	0	NA	NA	NA	NA	Not Reported	NA	3f033c96-2833-5c8c-816f-1a075c63d991	NA	NA	71	-26052	1938	NA	07b2cd1a-4f78-592c-bc7e-6ed1de26dace	Alive	not hispanic or latino	female	white	NA	NA	NA	Radiation Therapy, NOS
TCGA-E2-A1IL	Lobular carcinoma, NOS	not reported	M0	not reported	T1c	Stage IIA	Breast, NOS	No	no	8520/3	C50.9	released	No	not reported	9d254c85-3a70-5370-8568-0a897bff80b4	Breast, NOS	118	NA	stage iia	2009	28495	2019-08-08T16:28:29.970921-05:00	NA	not reported	6th	N1a	0	NA	NA	NA	NA	Not Reported	NA	f6de9a9f-8531-5d2f-8937-839da22f933e	NA	NA	78	-28495	1931	NA	07bae2f4-4b10-59b8-8561-c8184d060fd4	Alive	not hispanic or latino	female	white	NA	NA	NA	Radiation Therapy, NOS
TCGA-E2-A1IN	Infiltrating duct carcinoma, NOS	not reported	M0	not reported	T1c	Stage I	Breast, NOS	No	no	8500/3	C50.9	released	No	not reported	06a9dfa6-9a82-5dcd-9adb-a1ed0c14bce6	Breast, NOS	675	NA	stage i	2010	22199	2019-08-08T16:28:29.970921-05:00	NA	not reported	7th	N0	0	NA	NA	NA	NA	Not Reported	NA	38a51df9-74f0-5c02-a264-009129dfbd6e	NA	NA	60	-22199	1950	NA	90b76df2-3163-5d68-a19b-9258ac92db8b	Alive	not hispanic or latino	female	white	NA	NA	NA	Radiation Therapy, NOS
TCGA-E2-A1IO	Infiltrating duct carcinoma, NOS	not reported	M0	not reported	T1c	Stage I	Breast, NOS	No	no	8500/3	C50.9	released	No	not reported	8da435f2-f645-5886-b0ce-aff1610c31c3	Breast, NOS	1855	NA	stage i	2009	13671	2019-08-08T16:28:29.970921-05:00	NA	not reported	6th	N0	0	NA	NA	NA	NA	Not Reported	NA	132f53e6-cadd-5417-ab7b-88ffee865942	NA	NA	37	-13671	1972	NA	1d791e11-18a9-5e28-9213-60659638aa9b	Alive	not hispanic or latino	female	white	NA	NA	NA	Radiation Therapy, NOS
TCGA-E2-A1IU	Infiltrating duct carcinoma, NOS	not reported	M0	not reported	T1c	Stage IA	Breast, NOS	No	no	8500/3	C50.9	released	No	not reported	b881807c-67e1-5a31-80dc-850aa493733d	Breast, NOS	337	NA	stage ia	2010	22279	2019-08-08T16:28:29.970921-05:00	NA	not reported	7th	N0 (mol+)	0	NA	NA	NA	NA	Not Reported	NA	c325fd67-6023-5c43-85c2-4ed779fb9473	NA	NA	60	-22279	1950	NA	d14426b2-e0a0-519a-bea6-4fe07d11ce95	Alive	not hispanic or latino	female	white	NA	NA	NA	Radiation Therapy, NOS
TCGA-E2-A1L6	Infiltrating duct carcinoma, NOS	not reported	M0	not reported	T1c	Stage IIA	Breast, NOS	No	no	8500/3	C50.9	released	No	not reported	a3f101c8-8f00-572a-bda2-5301c9fc5e13	Breast, NOS	1648	NA	stage iia	2007	16403	2019-08-08T16:28:29.970921-05:00	NA	not reported	6th	N1mi	0	NA	NA	NA	NA	Not Reported	NA	b0cd3cab-06af-5364-8143-723bd5a7b025	NA	NA	44	-16403	1963	NA	26842ec0-94bd-5296-aae7-28811253ca52	Alive	not hispanic or latino	female	white	NA	NA	NA	Radiation Therapy, NOS
TCGA-E2-A1L7	Infiltrating duct carcinoma, NOS	not reported	M0	not reported	T2	Stage IIIA	Breast, NOS	No	no	8500/3	C50.9	released	No	not reported	4bb667ca-213f-5b17-ab35-76930e255da8	Breast, NOS	1836	NA	stage iiia	2009	14854	2019-08-08T16:28:29.970921-05:00	NA	not reported	6th	N2	0	NA	NA	NA	NA	Not Reported	NA	2e45a5ae-adcc-5702-b800-f928ea0c3d07	NA	NA	40	-14854	1969	NA	c1957b04-4594-598a-aef2-6a1688c8283e	Alive	not hispanic or latino	female	white	NA	NA	NA	Radiation Therapy, NOS
TCGA-E2-A1L8	Lobular carcinoma, NOS	not reported	M0	not reported	T2	Stage IIB	Breast, NOS	No	yes	8520/3	C50.9	released	Not Reported	not reported	cf50abbc-a6f7-52ef-94b7-e03ddbba845b	Breast, NOS	2240	NA	stage iib	2008	19187	2019-08-08T16:28:29.970921-05:00	NA	not reported	6th	N1a	0	NA	NA	NA	NA	Not Reported	NA	c29826be-f033-5b4c-aa85-eb3b632a7891	NA	NA	52	-19187	1956	NA	97e2709a-3c72-5dd8-ba3d-c4c167dd1d12	Alive	not hispanic or latino	female	black or african american	NA	NA	NA	Radiation Therapy, NOS
TCGA-E2-A1L9	Infiltrating duct carcinoma, NOS	not reported	M0	not reported	T1c	Stage IIA	Breast, NOS	No	no	8500/3	C50.9	released	No	not reported	94d75c76-6e00-557a-a408-0c5377c72c28	Breast, NOS	598	NA	stage iia	2009	14868	2019-08-08T16:28:29.970921-05:00	NA	not reported	6th	N1mi	0	NA	NA	NA	NA	Not Reported	NA	54d4d7ee-6441-5cd0-81ad-6d43d6adb516	NA	NA	40	-14868	1969	NA	024b6b20-56a1-5362-9593-368c6112ef8c	Alive	not hispanic or latino	female	white	NA	NA	NA	Radiation Therapy, NOS
TCGA-E2-A1LA	Infiltrating duct carcinoma, NOS	not reported	M0	not reported	T1c	Stage IIA	Breast, NOS	No	no	8500/3	C50.9	released	No	not reported	7f5c9f43-1047-54b1-b5d9-1f71a5e81ba5	Breast, NOS	748	NA	stage iia	2009	21773	2019-08-08T16:28:29.970921-05:00	NA	not reported	6th	N1a	0	NA	NA	NA	NA	Not Reported	NA	53717279-5a5b-585f-bfe3-83594b9bb95a	NA	NA	59	-21773	1950	NA	d3191db4-fa53-5e4a-a4e2-2f1508e13018	Alive	not hispanic or latino	female	not reported	NA	NA	NA	Radiation Therapy, NOS
TCGA-E2-A1LB	Infiltrating duct carcinoma, NOS	not reported	M0	not reported	T2	Stage IIB	Breast, NOS	No	no	8500/3	C50.9	released	No	not reported	6a14b439-df45-5384-9fa2-52a4b0078b15	Breast, NOS	2306	NA	stage iib	2008	15283	2019-08-08T16:28:29.970921-05:00	NA	not reported	6th	N1	0	NA	NA	NA	NA	Not Reported	NA	1a966590-e59f-51d9-b1a8-dcd66dd01c79	NA	NA	41	-15283	1967	NA	780d39c0-47fa-5cf5-86df-20467ef291fe	Alive	not hispanic or latino	female	black or african american	NA	NA	NA	Radiation Therapy, NOS
TCGA-E2-A1LE	Infiltrating duct carcinoma, NOS	not reported	M0	not reported	T2	Stage IIIC	Breast, NOS	No	no	8500/3	C50.9	released	No	not reported	23df93d0-05b9-54f8-a1a9-438e8576de4f	Breast, NOS	NA	NA	stage iiic	2008	26239	2019-08-08T16:28:29.970921-05:00	NA	not reported	6th	N3a	0	NA	NA	NA	NA	Not Reported	NA	4c456a08-ffda-507f-a3e3-d273e5c49864	NA	NA	71	-26239	1937	2010	4394b44c-b51d-5b96-b62b-db7f49007b43	Dead	not hispanic or latino	female	white	879	NA	NA	Radiation Therapy, NOS
TCGA-E2-A1LG	Lobular carcinoma, NOS	not reported	M0	not reported	T2	Stage IIA	Breast, NOS	No	yes	8520/3	C50.9	released	Not Reported	not reported	baea35ee-a9e0-50dd-a2ba-0abfbd9f408e	Breast, NOS	1523	NA	stage iia	2010	18492	2019-08-08T16:28:29.970921-05:00	NA	not reported	7th	N0	0	NA	NA	NA	NA	Not Reported	NA	a252e1ce-10f7-5830-9a6b-0f48b0ae5f77	NA	NA	50	-18492	1960	NA	6251a232-986e-527f-a50e-67ef0eda9b80	Alive	not hispanic or latino	female	black or african american	NA	NA	NA	Radiation Therapy, NOS
TCGA-E2-A1LH	Infiltrating duct carcinoma, NOS	not reported	M0	not reported	T1c	Stage I	Breast, NOS	No	no	8500/3	C50.9	released	No	not reported	a34520a7-503f-5ced-ab2a-36ca8ca5d354	Breast, NOS	3247	NA	stage i	2002	21628	2019-08-08T16:28:29.970921-05:00	NA	not reported	5th	N0	0	NA	NA	NA	NA	Not Reported	NA	7f1061fd-3ff9-5f05-842a-d45e5e968604	NA	NA	59	-21628	1943	NA	d080bdf8-4ea1-50c2-9a3f-17da4fd77212	Alive	not hispanic or latino	female	white	NA	NA	NA	Radiation Therapy, NOS
TCGA-E2-A1LI	Infiltrating duct carcinoma, NOS	not reported	M0	not reported	T2	Stage IIB	Breast, NOS	No	no	8500/3	C50.9	released	No	not reported	078851b6-5292-51e7-8761-0a257147f1bb	Breast, NOS	3121	NA	stage iib	2003	21064	2019-08-08T16:28:29.970921-05:00	NA	not reported	6th	N1	0	NA	NA	NA	NA	Not Reported	NA	c01701ce-2028-5b64-b160-4fb8e1703625	NA	NA	57	-21064	1946	NA	d81fd9c3-fa04-537c-894c-5986b22bcc66	Alive	not hispanic or latino	female	white	NA	NA	NA	Radiation Therapy, NOS
TCGA-E2-A1LK	Infiltrating duct carcinoma, NOS	not reported	M0	not reported	T4b	Stage IIIC	Breast, NOS	No	no	8500/3	C50.9	released	No	not reported	43c6ce06-86c1-5278-a71c-26aa55b9a976	Breast, NOS	NA	NA	stage iiic	2008	30757	2019-08-08T16:28:29.970921-05:00	NA	not reported	6th	N3a	0	NA	NA	NA	NA	Not Reported	NA	3db0c896-67c7-56de-b3c9-6a4a0b30786c	NA	NA	84	-30757	1924	2008	5361a279-7ce7-55a5-abf0-0c062d0a2c7b	Dead	not hispanic or latino	female	black or african american	266	NA	NA	Radiation Therapy, NOS
TCGA-E2-A1LL	Infiltrating duct carcinoma, NOS	not reported	MX	not reported	T3	Stage IIIA	Breast, NOS	No	no	8500/3	C50.9	released	No	not reported	e3189712-a2ae-5336-b9e8-697ad1934bb2	Breast, NOS	1309	NA	stage iiia	2008	27028	2019-08-08T16:28:29.970921-05:00	NA	not reported	6th	N2a	0	NA	NA	NA	NA	Not Reported	NA	0e66bcd7-7f5e-5b66-9e09-1a6e4ae622fa	NA	NA	73	-27028	1935	NA	e0221d77-e714-56b0-ad23-0c2b378fcd2f	Alive	not hispanic or latino	female	black or african american	NA	NA	NA	Radiation Therapy, NOS
TCGA-E2-A1LS	Infiltrating duct carcinoma, NOS	not reported	M0	not reported	T1c	Stage IA	Breast, NOS	No	no	8500/3	C50.9	released	No	not reported	128cd95f-b603-5ade-80cf-079a207888ce	Breast, NOS	1604	NA	stage ia	2010	16887	2019-08-08T16:28:29.970921-05:00	NA	not reported	7th	N0	0	NA	NA	NA	NA	Not Reported	NA	082a0e04-234b-586d-9391-b14296aedc7a	NA	NA	46	-16887	1964	NA	87bac088-1120-5f95-ab9b-9b5720fe9033	Alive	not reported	female	white	NA	NA	NA	Radiation Therapy, NOS
TCGA-E2-A2P5	Lobular carcinoma, NOS	not reported	M0	not reported	T2	Stage IIIC	Breast, NOS	No	yes	8520/3	C50.9	released	Not Reported	not reported	71745f79-00d2-5f96-8668-bd9fc2574181	Breast, NOS	515	NA	stage iiic	2011	28621	2019-08-08T16:28:29.970921-05:00	NA	not reported	7th	N3	0	NA	NA	NA	NA	Not Reported	NA	c1d59236-1709-5b4f-96da-9655a8ad64d5	NA	NA	78	-28621	1933	NA	fb9bc1e0-e1b5-5150-9699-1a820d55d678	Dead	not hispanic or latino	female	black or african american	821	NA	NA	Radiation Therapy, NOS
TCGA-E2-A2P6	Lobular carcinoma, NOS	not reported	M0	not reported	T2	Stage IIB	Breast, NOS	No	no	8520/3	C50.9	released	No	not reported	29eb77fe-207c-584f-8250-5b322d96621b	Breast, NOS	1051	NA	stage iib	2011	28411	2019-08-08T16:28:29.970921-05:00	NA	not reported	7th	N1	0	NA	NA	NA	NA	Not Reported	NA	601373e1-4391-52d7-9c64-6ad6d3476956	NA	NA	77	-28411	1934	NA	2f1785af-3e73-596a-8838-5a09dc69451e	Alive	hispanic or latino	female	not reported	NA	NA	NA	Radiation Therapy, NOS
TCGA-E2-A3DX	Lobular carcinoma, NOS	not reported	M0	not reported	T2	Stage IIIC	Breast, NOS	No	no	8520/3	C50.9	released	No	not reported	40136d4a-4022-5dd5-9603-1a1e632d69ad	Breast, NOS	1325	NA	stage iiic	2011	15969	2019-08-08T16:28:29.970921-05:00	NA	not reported	7th	N3	0	NA	NA	NA	NA	Not Reported	NA	25b42076-38c7-58f4-b737-f49a1b342575	NA	NA	43	-15969	1968	NA	64740ea3-c719-573e-9735-5ae0e9eb6c87	Alive	not hispanic or latino	female	white	NA	NA	NA	Radiation Therapy, NOS
TCGA-E2-A56Z	Infiltrating duct carcinoma, NOS	not reported	M0	not reported	T2	Stage IIB	Breast, NOS	No	no	8500/3	C50.9	released	No	not reported	1a0707e2-a7af-5aee-997d-1d45ceebd50c	Breast, NOS	252	NA	stage iib	2012	25282	2019-08-08T16:28:29.970921-05:00	NA	not reported	7th	N1a	0	NA	NA	NA	NA	Not Reported	NA	10b5f9c4-e24e-57b9-9e81-fa97c8c170ff	NA	NA	69	-25282	1943	NA	8fcc20c9-ed08-597f-bdcd-438ab165562c	Alive	not hispanic or latino	female	black or african american	NA	NA	NA	Radiation Therapy, NOS
TCGA-E2-A570	Infiltrating duct carcinoma, NOS	not reported	M0	not reported	T1c	Stage IB	Breast, NOS	No	no	8500/3	C50.9	released	No	not reported	9cc17651-1122-53bd-b005-1faa310e856f	Breast, NOS	931	NA	stage ib	2011	17456	2019-08-08T16:28:29.970921-05:00	NA	not reported	7th	N1mi	0	NA	NA	NA	NA	Not Reported	NA	4dc34d32-13b6-5b86-b932-daee52a9451d	NA	NA	47	-17456	1964	NA	3498eea3-4732-5c0a-8b9e-09599478966e	Alive	not hispanic or latino	female	black or african american	NA	NA	NA	Radiation Therapy, NOS
TCGA-E2-A572	Infiltrating duct carcinoma, NOS	not reported	M0	not reported	T2	Stage IIIA	Breast, NOS	No	yes	8500/3	C50.9	released	Not Reported	not reported	2f55d842-1e84-54da-b7d9-fb9a61455897	Breast, NOS	1208	NA	stage iiia	2011	26399	2019-08-08T16:28:29.970921-05:00	NA	not reported	7th	N2	0	NA	NA	NA	NA	Not Reported	NA	5b80e370-7571-5da4-8ad5-211e42fbecf4	NA	NA	72	-26399	1939	NA	9e5830c2-2a7c-5a62-bc1d-99b2aa3f4420	Alive	not hispanic or latino	female	black or african american	NA	NA	NA	Radiation Therapy, NOS
TCGA-E2-A573	Infiltrating duct carcinoma, NOS	not reported	M0	not reported	T1c	Stage IA	Breast, NOS	No	no	8500/3	C50.9	released	No	not reported	527aac9d-5257-5f87-a3c4-4fdc99f72bab	Breast, NOS	1062	NA	stage ia	2011	17689	2019-08-08T16:28:29.970921-05:00	NA	not reported	7th	N0	0	NA	NA	NA	NA	Not Reported	NA	7d472ae0-5fd4-51c4-9b4e-cd6fb824e1a9	NA	NA	48	-17689	1963	NA	41dd0092-686b-5efe-bca1-a817d5b34c2f	Alive	not hispanic or latino	female	black or african american	NA	NA	NA	Radiation Therapy, NOS
TCGA-E2-A574	Infiltrating duct carcinoma, NOS	not reported	M0	not reported	T2	Stage IIA	Breast, NOS	No	no	8500/3	C50.9	released	No	not reported	13dcd036-4382-55ed-8d2c-69d6d5a81352	Breast, NOS	1179	NA	stage iia	2011	16195	2019-08-08T16:28:29.970921-05:00	NA	not reported	7th	N0	0	NA	NA	NA	NA	Not Reported	NA	39365eb5-6271-5e1c-9faf-f63c85c49175	NA	NA	44	-16195	1967	NA	7464b70e-84db-5e22-aadd-f6a7e34bab6f	Alive	not hispanic or latino	female	black or african american	NA	NA	NA	Radiation Therapy, NOS
TCGA-E2-A576	Lobular carcinoma, NOS	not reported	MX	not reported	T1c	Stage IA	Breast, NOS	No	no	8520/3	C50.9	released	No	not reported	dbad4cf0-b38b-5cd4-aed6-09bc724979c2	Breast, NOS	1043	NA	stage ia	2011	25350	2019-08-08T16:28:29.970921-05:00	NA	not reported	7th	N0	0	NA	NA	NA	NA	Not Reported	NA	1832f073-37ed-5f6f-b9fc-84ff1235eefd	NA	NA	69	-25350	1942	NA	09ba4591-4434-58ec-b276-a7d5f24440d1	Alive	not hispanic or latino	female	black or african american	NA	NA	NA	Radiation Therapy, NOS
TCGA-E2-A9RU	Infiltrating duct carcinoma, NOS	not reported	MX	not reported	T2	Stage IIIC	Breast, NOS	No	no	8500/3	C50.9	released	No	not reported	7a61066b-f5be-5562-8fb0-85976a509ff4	Breast, NOS	0	NA	stage iiic	2013	32872	2019-08-08T16:28:29.970921-05:00	NA	not reported	7th	N3a	0	NA	NA	NA	NA	Not Reported	NA	484a4d77-a5c4-5c28-895e-a590a4eada74	NA	NA	90	-32872	1923	NA	0e686a75-d776-5e0a-8d0e-ffe9a61847fd	Alive	not hispanic or latino	female	black or african american	NA	NA	NA	Radiation Therapy, NOS
TCGA-E9-A1N3	Infiltrating duct and lobular carcinoma	not reported	M0	not reported	T1c	Stage IIIA	Breast, NOS	No	no	8522/3	C50.9	released	No	not reported	43ed3a2e-a043-53db-b20e-4e6eeab9cf82	Breast, NOS	1059	NA	stage iiia	2010	25714	2019-08-08T16:28:29.970921-05:00	NA	not reported	7th	N2	0	NA	NA	NA	NA	Not Reported	NA	203c77df-e16e-5ea0-84ad-6bdd7b4bb86b	NA	NA	70	-25714	1940	NA	d1a3ec9c-bfcb-5d5c-858f-7a90f4e51baf	Alive	not hispanic or latino	female	white	NA	NA	NA	Radiation Therapy, NOS
TCGA-E9-A1N4	Lobular carcinoma, NOS	not reported	M0	not reported	T2	Stage IIIA	Breast, NOS	No	no	8520/3	C50.9	released	No	not reported	9c2d55d3-bc87-58b8-8033-76043a983819	Breast, NOS	1000	NA	stage iiia	2010	15055	2019-08-08T16:28:29.970921-05:00	NA	not reported	7th	N2	0	NA	NA	NA	NA	Not Reported	NA	5b5ae985-b291-5ae6-80a1-d39ca682a66d	NA	NA	41	-15055	1969	NA	e55dcc6e-64be-5cb8-a1de-38a1922f161b	Alive	not hispanic or latino	female	white	NA	NA	NA	Radiation Therapy, NOS
TCGA-E9-A1N5	Infiltrating duct and lobular carcinoma	not reported	M0	not reported	T2	Stage IIB	Breast, NOS	No	no	8522/3	C50.9	released	No	not reported	bde621cb-ab8d-5892-aa5b-2821096da208	Breast, NOS	1120	NA	stage iib	2010	16736	2019-08-08T16:28:29.970921-05:00	NA	not reported	7th	N1	0	NA	NA	NA	NA	Not Reported	NA	4149f4db-8fd2-5968-bfd7-cfc1609d9c58	NA	NA	45	-16736	1965	NA	01e0be8d-2881-5646-9867-9a09d0ce14c5	Alive	not hispanic or latino	female	white	NA	NA	NA	Radiation Therapy, NOS
TCGA-E9-A1N6	Infiltrating duct carcinoma, NOS	not reported	M0	not reported	T2	Stage IIB	Breast, NOS	No	no	8500/3	C50.9	released	No	not reported	7142d0c7-63da-501b-baff-f38a2a4cd02a	Breast, NOS	410	NA	stage iib	2010	19327	2019-08-08T16:28:29.970921-05:00	NA	not reported	7th	N1	0	NA	NA	NA	NA	Not Reported	NA	38394e47-1aba-5bfa-90f6-5c4fb1fef2e4	NA	NA	52	-19327	1958	NA	b12d91ef-1619-5b86-869d-9668a7d76d02	Dead	not hispanic or latino	female	white	678	NA	NA	Radiation Therapy, NOS
TCGA-E9-A1N8	Infiltrating duct carcinoma, NOS	not reported	M0	not reported	T2	Stage IIA	Breast, NOS	No	no	8500/3	C50.9	released	No	not reported	835aa871-b8d9-5e54-9dc1-24ef4d091180	Breast, NOS	1039	NA	stage iia	2010	17652	2019-08-08T16:28:29.970921-05:00	NA	not reported	7th	N0	0	NA	NA	NA	NA	Not Reported	NA	75a55d3b-e0e4-506f-bdd8-9df11a05644f	NA	NA	48	-17652	1962	NA	a143a1df-03e5-508e-b583-fb9d3c7afcc8	Alive	not hispanic or latino	female	white	NA	NA	NA	Radiation Therapy, NOS
TCGA-E9-A1N9	Infiltrating duct and lobular carcinoma	not reported	M0	not reported	T2	Stage IIA	Breast, NOS	No	no	8522/3	C50.9	released	No	not reported	a477baee-5a07-53a1-b179-55ba8bfde074	Breast, NOS	1101	NA	stage iia	2011	21228	2019-08-08T16:28:29.970921-05:00	NA	not reported	7th	N0	0	NA	NA	NA	NA	Not Reported	NA	5deb7825-1833-5a37-9a72-8f53ac8ff2ad	NA	NA	58	-21228	1953	NA	26d50768-39dc-5746-93d6-7f6905a2b434	Alive	not hispanic or latino	female	white	NA	NA	NA	Radiation Therapy, NOS
TCGA-E9-A1NA	Infiltrating duct and lobular carcinoma	not reported	M0	not reported	T2	Stage IIA	Breast, NOS	No	no	8522/3	C50.9	released	No	not reported	329118d4-2cd9-5f26-93d2-a38e78500858	Breast, NOS	1112	NA	stage iia	2011	21397	2019-08-08T16:28:29.970921-05:00	NA	not reported	7th	N0	0	NA	NA	NA	NA	Not Reported	NA	aa130027-3adc-51d7-bdff-6cad71381de7	NA	NA	58	-21397	1953	NA	32145dd3-ff61-5ab0-b85b-2bd2405840c9	Alive	not hispanic or latino	female	white	NA	NA	NA	Radiation Therapy, NOS
TCGA-E9-A1ND	Infiltrating duct carcinoma, NOS	not reported	M0	not reported	T2	Stage IIB	Breast, NOS	No	no	8500/3	C50.9	released	No	not reported	4c8a4db0-2292-59e4-b2ca-d70d05239cec	Breast, NOS	1266	NA	stage iib	2011	27400	2019-08-08T16:28:29.970921-05:00	NA	not reported	7th	N1	0	NA	NA	NA	NA	Not Reported	NA	a1d26f66-c98d-5bcb-93a5-25de968962be	NA	NA	75	-27400	1936	NA	9d2fe39f-a7f0-5a61-85c1-e4673522cf49	Alive	not hispanic or latino	female	white	NA	NA	NA	Radiation Therapy, NOS
TCGA-E9-A1NE	Infiltrating duct and lobular carcinoma	not reported	M0	not reported	T2	Stage IIB	Breast, NOS	No	no	8522/3	C50.9	released	No	not reported	d8b9b7ca-c888-51fe-9131-c834b972cd89	Breast, NOS	1088	NA	stage iib	2011	10564	2019-08-08T16:28:29.970921-05:00	NA	not reported	7th	N1	0	NA	NA	NA	NA	Not Reported	NA	c586a479-5c45-5d5e-8788-e411c30ee8b5	NA	NA	28	-10564	1983	NA	17846c01-7dd4-5800-bf34-1ca8819b6e21	Alive	not hispanic or latino	female	white	NA	NA	NA	Radiation Therapy, NOS
TCGA-E9-A1NF	Infiltrating duct and lobular carcinoma	not reported	M0	not reported	T2	Stage IIA	Breast, NOS	No	no	8522/3	C50.9	released	No	not reported	92a02928-76c3-5ce9-a0ad-a507f90f0a49	Breast, NOS	610	NA	stage iia	2011	21981	2019-08-08T16:28:29.970921-05:00	NA	not reported	7th	N0	0	NA	NA	NA	NA	Not Reported	NA	c58dc88d-cdb8-537f-8dfa-25c33229950e	NA	NA	60	-21981	1951	NA	a1fc55a0-8653-53ff-8bf7-3291f5d9b5f9	Dead	not hispanic or latino	female	white	1072	NA	NA	Radiation Therapy, NOS
TCGA-E9-A1NG	Infiltrating duct carcinoma, NOS	not reported	M0	not reported	T2	Stage IIA	Breast, NOS	No	no	8500/3	C50.9	released	No	not reported	e52cabe6-c95e-5fa3-91a2-c79c5e202294	Breast, NOS	656	NA	stage iia	2011	22896	2019-08-08T16:28:29.970921-05:00	NA	not reported	7th	N0	0	NA	NA	NA	NA	Not Reported	NA	316af890-6283-5059-992d-c99284c9e791	NA	NA	62	-22896	1949	NA	6f67f0ee-afd3-5d28-8e51-e7b94ca758e7	Dead	not hispanic or latino	female	white	786	NA	NA	Radiation Therapy, NOS
TCGA-E9-A1NH	Infiltrating duct carcinoma, NOS	not reported	M0	not reported	T2	Stage IIB	Breast, NOS	No	no	8500/3	C50.9	released	No	not reported	82864559-0110-597c-b76d-0d6af68fbe04	Breast, NOS	576	NA	stage iib	2011	26221	2019-08-08T16:28:59.107330-05:00	NA	not reported	7th	N1	0	NA	NA	NA	NA	Not Reported	NA	675f1bc8-75b4-5e21-8e9f-79bdbd4a77ce	NA	NA	71	-26221	1940	NA	bf0f629f-ca68-52dc-8540-dd92128f1632	Alive	not hispanic or latino	female	white	NA	NA	NA	Radiation Therapy, NOS
TCGA-E9-A1NI	Infiltrating duct and lobular carcinoma	not reported	M0	not reported	T2	Stage IIA	Breast, NOS	No	no	8522/3	C50.9	released	No	not reported	79b22003-ed48-575e-ba0e-2073d60fa14f	Breast, NOS	300	NA	stage iia	2011	18985	2019-08-08T16:28:59.107330-05:00	NA	not reported	7th	N0	0	NA	NA	NA	NA	Not Reported	NA	bf3601a1-b421-519f-9ff8-81eb6806ca8d	NA	NA	51	-18985	1960	NA	c23befb8-638e-53db-a778-678f110b8d33	Alive	not hispanic or latino	female	white	NA	NA	NA	Radiation Therapy, NOS
TCGA-E9-A1QZ	Infiltrating duct carcinoma, NOS	not reported	M0	not reported	T2	Stage IIA	Breast, NOS	No	no	8500/3	C50.9	released	No	not reported	b9af21b9-71de-5241-abf6-ac548efb8413	Breast, NOS	755	NA	stage iia	2011	22397	2019-08-08T16:28:59.107330-05:00	NA	not reported	7th	N0	0	NA	NA	NA	NA	Not Reported	NA	1d0eb2c9-38be-5eab-862d-0e57d2004116	NA	NA	61	-22397	1950	NA	bebe1299-b477-5917-bc5e-378fd2d47588	Alive	not hispanic or latino	female	white	NA	NA	NA	Radiation Therapy, NOS
TCGA-E9-A1R0	Infiltrating duct carcinoma, NOS	not reported	M0	not reported	T1c	Stage IIA	Breast, NOS	No	no	8500/3	C50.9	released	No	not reported	a15c12e6-8e95-545e-8e69-a31b150f90f4	Breast, NOS	860	NA	stage iia	2011	21394	2019-08-08T16:28:59.107330-05:00	NA	not reported	7th	N1	0	NA	NA	NA	NA	Not Reported	NA	0443c635-9273-5a00-9c13-9783ddca6955	NA	NA	58	-21394	1953	NA	dfad4f8b-a8be-5753-b35a-b09849f76d61	Alive	not hispanic or latino	female	white	NA	NA	NA	Radiation Therapy, NOS
TCGA-E9-A1R2	Infiltrating duct carcinoma, NOS	not reported	MX	not reported	T2	Stage IIIC	Breast, NOS	No	no	8500/3	C50.9	released	No	not reported	d78181ee-ec7f-5485-9a24-1afdf99a5508	Breast, NOS	1063	NA	stage iiic	2011	18936	2019-08-08T16:28:59.107330-05:00	NA	not reported	7th	N3	0	NA	NA	NA	NA	Not Reported	NA	55e9d89e-eaed-5112-bee7-26f46821e870	NA	NA	51	-18936	1960	NA	73039d5b-4689-5608-a7fa-27d5fde3fc04	Alive	not hispanic or latino	female	white	NA	NA	NA	Radiation Therapy, NOS
TCGA-E9-A1R3	Infiltrating duct carcinoma, NOS	not reported	M0	not reported	T2	Stage IIIC	Breast, NOS	No	no	8500/3	C50.9	released	No	not reported	601d5263-d4f8-53e6-aac2-5721a034cb03	Breast, NOS	78	NA	stage iiic	2010	25693	2019-08-08T16:28:59.107330-05:00	NA	not reported	7th	N3	0	NA	NA	NA	NA	Not Reported	NA	97509c92-a4f4-56fd-800f-88af36ec98b0	NA	NA	70	-25693	1940	NA	c9b8c735-aa08-55ae-a159-ea61a2523373	Alive	not hispanic or latino	female	white	NA	NA	NA	Radiation Therapy, NOS
TCGA-E9-A1R5	Infiltrating duct carcinoma, NOS	not reported	M0	not reported	T1c	Stage IA	Breast, NOS	No	no	8500/3	C50.9	released	No	not reported	eb21dd54-f0b2-589c-81ca-ee8e50c65597	Breast, NOS	92	NA	stage ia	2011	23116	2019-08-08T16:28:59.107330-05:00	NA	not reported	7th	N0	0	NA	NA	NA	NA	Not Reported	NA	a117844f-4209-5cef-9766-7bc44e975918	NA	NA	63	-23116	1948	NA	128f8add-cfe0-5582-b8f6-635416a1ca0e	Alive	not hispanic or latino	female	white	NA	NA	NA	Radiation Therapy, NOS
TCGA-E9-A1R7	Infiltrating duct carcinoma, NOS	not reported	M0	not reported	T2	Stage IIA	Breast, NOS	No	no	8500/3	C50.9	released	No	not reported	0642ad9a-1641-5aea-81a0-c75928dad4b4	Breast, NOS	1467	NA	stage iia	2011	23397	2019-08-08T16:28:59.107330-05:00	NA	not reported	7th	N0	0	NA	NA	NA	NA	Not Reported	NA	720b2d03-70e0-54a7-93e2-79071f916093	NA	NA	64	-23397	1947	NA	abb080bd-f58c-565d-a0b9-1da5273e1db3	Alive	not hispanic or latino	female	white	NA	NA	NA	Radiation Therapy, NOS
TCGA-E9-A1RA	Infiltrating duct carcinoma, NOS	not reported	M0	not reported	T1c	Stage IA	Breast, NOS	No	no	8500/3	C50.9	released	No	not reported	d7236219-ac2c-52af-816e-7fc03c0d88c1	Breast, NOS	1369	NA	stage ia	2011	17699	2019-08-08T16:28:59.107330-05:00	NA	not reported	7th	N0	0	NA	NA	NA	NA	Not Reported	NA	5f137d9a-9f06-5f0c-a0fe-9146aaa01c9c	NA	NA	48	-17699	1963	NA	c5eb1ec6-395e-54eb-8d07-e8e8e4944d35	Alive	not hispanic or latino	female	white	NA	NA	NA	Radiation Therapy, NOS
TCGA-E9-A1RB	Infiltrating duct carcinoma, NOS	not reported	M0	not reported	T2	Stage IIA	Breast, NOS	No	no	8500/3	C50.9	released	No	not reported	bdcaf93c-330d-5d9c-a418-f2032fbab3fd	Breast, NOS	633	NA	stage iia	2011	14755	2019-08-08T16:28:59.107330-05:00	NA	not reported	7th	N0	0	NA	NA	NA	NA	Not Reported	NA	3b6410e7-5fff-5b6d-9928-2eeaf8ad7141	NA	NA	40	-14755	1971	NA	ecaccbbc-4eb7-592f-9c3f-d914e7ed8f41	Dead	not hispanic or latino	female	white	976	NA	NA	Radiation Therapy, NOS
TCGA-E9-A1RC	Infiltrating duct and lobular carcinoma	not reported	M0	not reported	T4b	Stage IIIC	Breast, NOS	No	no	8522/3	C50.9	released	No	not reported	16e917ef-bd7b-56c9-a6fa-f7d8f8375a16	Breast, NOS	1224	NA	stage iiic	2007	20795	2019-08-08T16:28:59.107330-05:00	NA	not reported	7th	N3	0	NA	NA	NA	NA	Not Reported	NA	1f16d618-62fa-5a9b-8882-4056e6c78f94	NA	NA	56	-20795	1951	NA	c364f766-a77c-5e9d-b2ee-37df478f2273	Alive	not hispanic or latino	female	white	NA	NA	NA	Radiation Therapy, NOS
TCGA-E9-A1RD	Infiltrating duct carcinoma, NOS	not reported	M0	not reported	T2	Stage IIA	Breast, NOS	No	no	8500/3	C50.9	released	No	not reported	7e0cf890-62dd-5a15-a633-5802facccc1b	Breast, NOS	34	NA	stage iia	2011	24719	2019-08-08T16:28:59.107330-05:00	NA	not reported	7th	N0	0	NA	NA	NA	NA	Not Reported	NA	7ff2b31a-cb35-5a92-a09e-a8a77c1258e6	NA	NA	67	-24719	1944	NA	ccf01a64-4e98-5aac-baf0-3af5bffcf220	Alive	not hispanic or latino	female	white	NA	NA	NA	Radiation Therapy, NOS
TCGA-E9-A1RE	Infiltrating duct carcinoma, NOS	not reported	M0	not reported	T2	Stage IIIA	Breast, NOS	No	no	8500/3	C50.9	released	No	not reported	7ea3bc6a-6840-5a36-856a-15c492c404b6	Breast, NOS	1419	NA	stage iiia	2011	27392	2019-08-08T16:28:59.107330-05:00	NA	not reported	7th	N2	0	NA	NA	NA	NA	Not Reported	NA	6362bd34-5817-5583-baca-d3a76623cacd	NA	NA	74	-27392	1937	NA	d9ff3e1c-39b5-5d11-9abb-e387e9022029	Alive	not hispanic or latino	female	white	NA	NA	NA	Radiation Therapy, NOS
TCGA-E9-A1RF	Infiltrating duct carcinoma, NOS	not reported	M0	not reported	T2	Stage IIIA	Breast, NOS	No	no	8500/3	C50.9	released	No	not reported	e03badde-0fa4-5204-827d-bb4c4f389f6c	Breast, NOS	200	NA	stage iiia	2011	25119	2019-08-08T16:28:59.107330-05:00	NA	not reported	7th	N2	0	NA	NA	NA	NA	Not Reported	NA	07f30986-78af-5047-bbec-b3c3fd62aab0	NA	NA	68	-25119	1943	NA	0f4979ad-6aa5-5e73-8d16-844254331b66	Alive	not hispanic or latino	female	white	NA	NA	NA	Radiation Therapy, NOS
TCGA-E9-A1RG	Infiltrating duct carcinoma, NOS	not reported	M0	not reported	T1c	Stage IIIA	Breast, NOS	No	no	8500/3	C50.9	released	No	not reported	103b471c-bb6d-5dcd-84e4-ed30ccfae7c3	Breast, NOS	647	NA	stage iiia	2011	22788	2019-08-08T16:28:59.107330-05:00	NA	not reported	7th	N2	0	NA	NA	NA	NA	Not Reported	NA	06aa4dba-f381-586a-badc-f65d3db112da	NA	NA	62	-22788	1949	NA	6b08715f-409e-51e4-8036-34924f759a81	Alive	not hispanic or latino	female	white	NA	NA	NA	Radiation Therapy, NOS
TCGA-E9-A1RH	Infiltrating duct carcinoma, NOS	not reported	M0	not reported	T2	Stage IIA	Breast, NOS	No	no	8500/3	C50.9	released	No	not reported	302f5c01-1140-5d3c-aa8a-cc2f6fd1c368	Breast, NOS	1417	NA	stage iia	2011	23224	2019-08-08T16:28:59.107330-05:00	NA	not reported	7th	N0	0	NA	NA	NA	NA	Not Reported	NA	6d3560b9-4835-5248-95ee-84972c703ce8	NA	NA	63	-23224	1948	NA	dc36db44-0161-5ab1-9136-8f3a4f509fb8	Alive	not hispanic or latino	female	white	NA	NA	NA	Radiation Therapy, NOS
TCGA-E9-A1RI	Infiltrating duct and lobular carcinoma	not reported	M0	not reported	T1c	Stage IIIA	Breast, NOS	No	no	8522/3	C50.9	released	No	not reported	836f9bfa-fa53-5bd9-8648-5f6b21547ae3	Breast, NOS	1449	NA	stage iiia	2011	15942	2019-08-08T16:28:59.107330-05:00	NA	not reported	7th	N2	0	NA	NA	NA	NA	Not Reported	NA	69fd9327-1f90-584f-ac01-7ec3935fc5a8	NA	NA	43	-15942	1968	NA	d0012c61-9eed-5e25-8281-09c10b78d055	Alive	not hispanic or latino	female	white	NA	NA	NA	Radiation Therapy, NOS
TCGA-E9-A226	Infiltrating duct carcinoma, NOS	not reported	M0	not reported	T2	Stage IIIA	Breast, NOS	No	no	8500/3	C50.9	released	No	not reported	5c046e97-bd02-5d04-9640-619159c5aa4b	Breast, NOS	1038	NA	stage iiia	2011	16511	2019-08-08T16:28:59.107330-05:00	NA	not reported	7th	N2	0	NA	NA	NA	NA	Not Reported	NA	8243ffaa-40f7-5404-bd86-c8dd3a11fe24	NA	NA	45	-16511	1966	NA	8f629767-d165-5840-b649-9c6d7ec6e8cf	Dead	not hispanic or latino	female	white	1048	NA	NA	Radiation Therapy, NOS
TCGA-E9-A227	Infiltrating duct carcinoma, NOS	not reported	M0	not reported	T2	Stage IIB	Breast, NOS	No	no	8500/3	C50.9	released	No	not reported	35416fc9-6d39-5690-9bce-1f6932461283	Breast, NOS	975	NA	stage iib	2011	15602	2019-08-08T16:28:59.107330-05:00	NA	not reported	7th	N1	0	NA	NA	NA	NA	Not Reported	NA	6a4098ca-fe09-5706-84ec-d64c9bef895d	NA	NA	42	-15602	1969	NA	27c104f6-eb60-52b3-968c-5f08fe28ec42	Alive	not hispanic or latino	female	white	NA	NA	NA	Radiation Therapy, NOS
TCGA-E9-A228	Infiltrating duct carcinoma, NOS	not reported	M0	not reported	T2	Stage IIB	Breast, NOS	No	no	8500/3	C50.9	released	No	not reported	92c0148b-f56c-5b92-8e9d-1b3944765806	Breast, NOS	1285	NA	stage iib	2011	21294	2019-08-08T16:28:59.107330-05:00	NA	not reported	7th	N1	0	NA	NA	NA	NA	Not Reported	NA	1c4336f3-c315-529e-b721-10132a25ed94	NA	NA	58	-21294	1953	NA	223fb427-e49d-544b-bbca-17fb125518d3	Alive	not hispanic or latino	female	white	NA	NA	NA	Radiation Therapy, NOS
TCGA-E9-A229	Infiltrating duct carcinoma, NOS	not reported	M0	not reported	T1c	Stage IA	Breast, NOS	No	no	8500/3	C50.9	released	No	not reported	f807131d-cefe-5992-855a-2713b032606d	Breast, NOS	1148	NA	stage ia	2011	13817	2019-08-08T16:28:59.107330-05:00	NA	not reported	7th	N0	0	NA	NA	NA	NA	Not Reported	NA	23142dc4-2584-538c-95e5-d80ea6400ca1	NA	NA	37	-13817	1974	NA	9d0b2b91-b622-5c89-908c-1e0bd20f34ba	Alive	not hispanic or latino	female	white	NA	NA	NA	Radiation Therapy, NOS
TCGA-E9-A22A	Infiltrating duct carcinoma, NOS	not reported	M0	not reported	T2	Stage IIA	Breast, NOS	No	no	8500/3	C50.9	released	No	not reported	7e7673c0-6d85-56f4-9fa7-6d7e363c3629	Breast, NOS	1189	NA	stage iia	2011	27288	2019-08-08T16:28:59.107330-05:00	NA	not reported	7th	N0	0	NA	NA	NA	NA	Not Reported	NA	52e2cf16-5c2e-56bc-9568-34606ef79b38	NA	NA	74	-27288	1937	NA	b8ae37ba-cb27-5019-908f-9f3a24eb7d32	Alive	not hispanic or latino	female	white	NA	NA	NA	Radiation Therapy, NOS
TCGA-E9-A22B	Infiltrating duct and lobular carcinoma	not reported	M0	not reported	T1c	Stage IA	Breast, NOS	No	no	8522/3	C50.9	released	No	not reported	1e7676fb-ffb7-57f4-9e36-c73294096eb8	Breast, NOS	1167	NA	stage ia	2011	26278	2019-08-08T16:28:59.107330-05:00	NA	not reported	7th	N0	0	NA	NA	NA	NA	Not Reported	NA	51d20549-f84c-5211-99b8-37bf86ce9679	NA	NA	71	-26278	1940	NA	783ba0ad-47c7-50cf-93df-88e3bb929e2c	Alive	not hispanic or latino	female	white	NA	NA	NA	Radiation Therapy, NOS
TCGA-E9-A22D	Infiltrating duct carcinoma, NOS	not reported	M0	not reported	T2	Stage IIA	Breast, NOS	No	no	8500/3	C50.9	released	No	not reported	d1b3eae3-2f87-5ccb-99cc-50ee59f7ed72	Breast, NOS	1248	NA	stage iia	2011	14115	2019-08-08T16:28:59.107330-05:00	NA	not reported	7th	N0	0	NA	NA	NA	NA	Not Reported	NA	f56fab2d-a449-549e-be03-07fb2ec6c7f4	NA	NA	38	-14115	1973	NA	16d6cfc7-e440-52f7-a254-63b3ac84d037	Alive	not hispanic or latino	female	white	NA	NA	NA	Radiation Therapy, NOS
TCGA-E9-A22E	Infiltrating duct carcinoma, NOS	not reported	M0	not reported	T2	Stage IIIA	Breast, NOS	No	no	8500/3	C50.9	released	No	not reported	216c4ef0-2d17-5082-855a-afac2b27aad3	Breast, NOS	1269	NA	stage iiia	2011	20574	2019-08-08T16:28:59.107330-05:00	NA	not reported	7th	N2	0	NA	NA	NA	NA	Not Reported	NA	82cb5bc0-6aa2-5daf-8d6a-c08be0a28235	NA	NA	56	-20574	1955	NA	aba87266-78e1-5153-886b-14764f57d7a2	Alive	not hispanic or latino	female	white	NA	NA	NA	Radiation Therapy, NOS
TCGA-E9-A22G	Infiltrating duct carcinoma, NOS	not reported	M0	not reported	T2	Stage IIA	Breast, NOS	No	no	8500/3	C50.9	released	No	not reported	3ad56e79-3369-562e-b182-5954b051352c	Breast, NOS	1239	NA	stage iia	2011	17300	2019-08-08T16:28:59.107330-05:00	NA	not reported	7th	N0	0	NA	NA	NA	NA	Not Reported	NA	d939f7fb-5da4-59f7-8262-95a4a075819b	NA	NA	47	-17300	1964	NA	7ee2a0be-d8ec-57c9-b3ec-0b7083142f31	Alive	not hispanic or latino	female	white	NA	NA	NA	Radiation Therapy, NOS
TCGA-E9-A22H	Infiltrating duct carcinoma, NOS	not reported	M0	not reported	T2	Stage IIB	Breast, NOS	No	no	8500/3	C50.9	released	No	not reported	3c4fbce5-0559-5d4f-bd44-3a9cbaca4c1f	Breast, NOS	1232	NA	stage iib	2011	15504	2019-08-08T16:28:59.107330-05:00	NA	not reported	7th	N1	0	NA	NA	NA	NA	Not Reported	NA	91a0de54-7599-5606-aed0-0425b3219154	NA	NA	42	-15504	1969	NA	fd0b7148-623f-557d-9163-bf34725c5bf1	Alive	not hispanic or latino	female	white	NA	NA	NA	Radiation Therapy, NOS
TCGA-E9-A243	Infiltrating duct carcinoma, NOS	not reported	M0	not reported	T2	Stage IIA	Breast, NOS	No	no	8500/3	C50.9	released	No	not reported	6375c05c-c771-5125-ab54-b60fcf13f50e	Breast, NOS	612	NA	stage iia	2011	19035	2019-08-08T16:28:59.107330-05:00	NA	not reported	7th	N0 (i-)	0	NA	NA	NA	NA	Not Reported	NA	ad729682-e163-5a86-b657-66b1891279c2	NA	NA	52	-19035	1959	NA	5d075425-0023-50cd-9e5f-150419d8c854	Alive	not hispanic or latino	female	white	NA	NA	NA	Radiation Therapy, NOS
TCGA-E9-A244	Infiltrating duct carcinoma, NOS	not reported	M0	not reported	T2	Stage IIA	Breast, NOS	No	no	8500/3	C50.9	released	No	not reported	64a89e26-fdd1-5947-a7cd-5039de833c41	Breast, NOS	21	NA	stage iia	2011	19778	2019-08-08T16:28:59.107330-05:00	NA	not reported	7th	N0 (i-)	0	NA	NA	NA	NA	Not Reported	NA	44b084c8-d459-578a-8af0-224009e55447	NA	NA	54	-19778	1957	NA	025fd22a-21b7-5b85-a71e-1237d22b1745	Alive	not hispanic or latino	female	white	NA	NA	NA	Radiation Therapy, NOS
TCGA-E9-A245	Infiltrating duct carcinoma, NOS	not reported	M0	not reported	T2	Stage IIB	Breast, NOS	No	no	8500/3	C50.9	released	No	not reported	f6763388-c066-5bc1-8f68-5a185e675431	Breast, NOS	26	NA	stage iib	2011	17363	2019-08-08T16:28:59.107330-05:00	NA	not reported	7th	N1	0	NA	NA	NA	NA	Not Reported	NA	8587d57c-71de-56ef-a6c5-eac864fbcf9b	NA	NA	47	-17363	1964	NA	277e3f68-54d1-5088-b53b-37e146fd0f9a	Dead	not hispanic or latino	female	white	NA	NA	NA	Radiation Therapy, NOS
TCGA-E9-A247	Infiltrating duct carcinoma, NOS	not reported	M0	not reported	T1c	Stage IA	Breast, NOS	No	no	8500/3	C50.9	released	No	not reported	233eb37a-259f-58ff-9ab5-7de0de3208ab	Breast, NOS	1186	NA	stage ia	2011	21562	2019-08-08T16:28:59.107330-05:00	NA	not reported	7th	N0 (i-)	0	NA	NA	NA	NA	Not Reported	NA	c3990f6d-c052-5ec6-98cb-cf8ebcfb7a57	NA	NA	59	-21562	1952	NA	439ce603-baf9-5c68-ae78-32812a666d92	Alive	not hispanic or latino	female	white	NA	NA	NA	Radiation Therapy, NOS
TCGA-E9-A248	Infiltrating duct carcinoma, NOS	not reported	M0	not reported	T2	Stage IIA	Breast, NOS	No	no	8500/3	C50.9	released	No	not reported	40008154-c7b9-59b2-a1d0-830d8e20f27c	Breast, NOS	59	NA	stage iia	2011	18684	2019-08-08T16:28:59.107330-05:00	NA	not reported	7th	N0 (i-)	0	NA	NA	NA	NA	Not Reported	NA	40f14bfe-994e-50f0-92fa-fdc5aa9cab04	NA	NA	51	-18684	1960	NA	1b49cc34-91f5-539a-8ffb-ea0187ab05d7	Alive	not hispanic or latino	female	white	NA	NA	NA	Radiation Therapy, NOS
TCGA-E9-A249	Infiltrating duct carcinoma, NOS	not reported	M0	not reported	T2	Stage IIA	Breast, NOS	No	no	8500/3	C50.9	released	No	not reported	b867d105-ec84-5b31-9341-8a737c45f034	Breast, NOS	217	NA	stage iia	2011	16689	2019-08-08T16:28:59.107330-05:00	NA	not reported	7th	N0 (i-)	0	NA	NA	NA	NA	Not Reported	NA	ca30fed7-a77b-5c32-8aea-383d4d5a2ddf	NA	NA	45	-16689	1966	NA	c1bd8d3d-5687-577f-92a4-5be430d4de16	Alive	not hispanic or latino	female	white	NA	NA	NA	Radiation Therapy, NOS
TCGA-E9-A24A	Infiltrating duct carcinoma, NOS	not reported	M0	not reported	T1c	Stage IIA	Breast, NOS	No	no	8500/3	C50.9	released	No	not reported	ce07fe7e-00aa-5005-bcc3-28a1c2625e91	Breast, NOS	747	NA	stage iia	2011	25370	2019-08-08T16:28:59.107330-05:00	NA	not reported	7th	N1	0	NA	NA	NA	NA	Not Reported	NA	5e3bbbf4-5ead-5a39-a8ab-ababf17f18ba	NA	NA	69	-25370	1942	NA	53d4fb4f-da2d-5d1e-937c-3632992cbeae	Alive	not hispanic or latino	female	white	NA	NA	NA	Radiation Therapy, NOS
TCGA-E9-A295	Lobular carcinoma, NOS	not reported	M0	not reported	T2	Stage IIA	Breast, NOS	No	no	8520/3	C50.9	released	No	not reported	feb90f8f-d3f0-5dab-8927-d563c4786aed	Breast, NOS	375	NA	stage iia	2011	25957	2019-08-08T16:28:59.107330-05:00	NA	not reported	7th	N0 (i-)	0	NA	NA	NA	NA	Not Reported	NA	22ee1967-1dac-530e-b939-b19c02814692	NA	NA	71	-25957	1940	NA	dc38f171-af3e-5f95-8c74-0d4704f606fd	Alive	not hispanic or latino	female	white	NA	NA	NA	Radiation Therapy, NOS
TCGA-E9-A2JS	Lobular carcinoma, NOS	not reported	M0	not reported	T2	Stage IIB	Breast, NOS	No	no	8520/3	C50.9	released	No	not reported	67a2f884-f491-5b40-96d4-74221b7d8242	Breast, NOS	540	NA	stage iib	2011	26407	2019-08-08T16:28:59.107330-05:00	NA	not reported	7th	N1	0	NA	NA	NA	NA	Not Reported	NA	d9f03557-b718-5c7f-aca2-a11b1275a1b0	NA	NA	72	-26407	1939	NA	18f50a02-b294-5146-a42d-6f7b1df3ddbc	Dead	not hispanic or latino	female	white	904	NA	NA	Radiation Therapy, NOS
TCGA-E9-A3Q9	Lobular carcinoma, NOS	not reported	M0	not reported	T3	Stage IIIC	Breast, NOS	No	no	8520/3	C50.9	released	No	not reported	c81cce09-8520-591e-83df-2e97092950a4	Breast, NOS	1001	NA	stage iiic	2011	28715	2019-08-08T16:28:59.107330-05:00	NA	not reported	7th	N3	0	NA	NA	NA	NA	Not Reported	NA	61bd3c1c-d57a-5b5f-9747-10c9b1043ca3	NA	NA	78	-28715	1933	NA	189748ec-bad7-5e2d-abbd-bc2c06a80d49	Alive	not hispanic or latino	female	white	NA	NA	NA	Radiation Therapy, NOS
TCGA-E9-A3QA	Medullary carcinoma, NOS	not reported	M0	not reported	T2	Stage IIA	Breast, NOS	No	no	8510/3	C50.9	released	No	not reported	2c3608ac-907b-5df0-8c70-361e425200dc	Breast, NOS	918	NA	stage iia	2011	12142	2019-08-08T16:28:59.107330-05:00	NA	not reported	7th	N0 (i-)	0	NA	NA	NA	NA	Not Reported	NA	d91541c7-9ccf-5d76-8dd3-33f94ae88fb5	NA	NA	33	-12142	1978	NA	2c14d710-383d-55b4-a4e3-438041769a45	Alive	not hispanic or latino	female	white	NA	NA	NA	Radiation Therapy, NOS
TCGA-E9-A3X8	Lobular carcinoma, NOS	not reported	M0	not reported	T2	Stage IIB	Breast, NOS	No	no	8520/3	C50.9	released	No	not reported	a9be8e7e-4d28-580a-a402-6ad88135e449	Breast, NOS	926	NA	stage iib	2011	17588	2019-08-08T16:28:59.107330-05:00	NA	not reported	7th	N1	0	NA	NA	NA	NA	Not Reported	NA	0087e877-5af3-562b-9f06-cfe63f2bee9e	NA	NA	48	-17588	1963	NA	4ebe4583-2b32-5e9e-9a93-375d75119a5a	Alive	not hispanic or latino	female	white	NA	NA	NA	Radiation Therapy, NOS
TCGA-E9-A54X	Mucinous adenocarcinoma	not reported	M0	not reported	T1b	Stage IA	Breast, NOS	No	no	8480/3	C50.9	released	No	not reported	07011898-89b4-5e64-ad87-10ee83a2f313	Breast, NOS	727	NA	stage ia	2012	31173	2019-08-08T16:28:59.107330-05:00	NA	not reported	7th	N0 (i-)	0	NA	NA	NA	NA	Not Reported	NA	c8b3ba7c-1d0d-500f-a762-1ff3429aee50	NA	NA	85	-31173	1927	NA	d2609565-0aee-5077-b1ba-dc4f2c72e686	Alive	not hispanic or latino	female	white	NA	NA	NA	Radiation Therapy, NOS
TCGA-E9-A54Y	Lobular carcinoma, NOS	not reported	M0	not reported	T2	Stage IIIA	Breast, NOS	No	no	8520/3	C50.9	released	No	not reported	5a7da42d-bdfc-54a8-a1c3-ff8a66bd8a3e	Breast, NOS	725	NA	stage iiia	2012	23057	2019-08-08T16:28:59.107330-05:00	NA	not reported	7th	N2	0	NA	NA	NA	NA	Not Reported	NA	2fa59dc5-fd4c-561d-a519-3fcb451db61a	NA	NA	63	-23057	1949	NA	d4c73e75-5b32-5c96-8881-153118d3d60c	Alive	not hispanic or latino	female	white	NA	NA	NA	Radiation Therapy, NOS
TCGA-E9-A5FK	Lobular carcinoma, NOS	not reported	M0	not reported	T2	Stage IIIC	Breast, NOS	No	no	8520/3	C50.9	released	No	not reported	be86039c-6eb0-5aed-bbcd-3898406f3e1c	Breast, NOS	812	NA	stage iiic	2012	22199	2019-08-08T16:28:59.107330-05:00	NA	not reported	7th	N3	0	NA	NA	NA	NA	Not Reported	NA	92284273-2814-56da-91d7-711342fcce09	NA	NA	60	-22199	1952	NA	3af6bc61-a250-5e84-9121-e0018236488e	Alive	not hispanic or latino	female	white	NA	NA	NA	Radiation Therapy, NOS
TCGA-E9-A5FL	Metaplastic carcinoma, NOS	not reported	M0	not reported	T3	Stage IIB	Breast, NOS	No	no	8575/3	C50.9	released	No	not reported	63d06bf8-70cd-5c28-aee2-6b774b65a672	Breast, NOS	24	NA	stage iib	2012	24053	2019-08-08T16:28:59.107330-05:00	NA	not reported	7th	N0	0	NA	NA	NA	NA	Not Reported	NA	3c4eb28c-d790-5542-b6e7-c7a661c78d2c	NA	NA	65	-24053	1947	NA	d5a825aa-5b7f-5752-b16c-82573f870d4d	Alive	not hispanic or latino	female	white	NA	NA	NA	Radiation Therapy, NOS
TCGA-E9-A5UO	Mucinous adenocarcinoma	not reported	M0	not reported	T2	Stage IIA	Breast, NOS	No	no	8480/3	C50.9	released	No	not reported	9e51b0ce-ed6a-5209-92cc-b13e30e0fc68	Breast, NOS	785	NA	stage iia	2012	15050	2019-08-08T16:28:59.107330-05:00	NA	not reported	7th	N0	0	NA	NA	NA	NA	Not Reported	NA	3f79dbbf-f1eb-567a-9921-2b905ddf5c15	NA	NA	41	-15050	1971	NA	5470dbdc-9b95-5f83-a717-ab0605ee9452	Alive	not hispanic or latino	female	white	NA	NA	NA	Radiation Therapy, NOS
TCGA-E9-A5UP	Intraductal papillary adenocarcinoma with invasion	not reported	M0	not reported	T2	Stage IIA	Breast, NOS	No	no	8503/3	C50.9	released	No	not reported	da4909d9-b7ee-59fb-b507-a95a7eab7e4a	Breast, NOS	803	NA	stage iia	2012	23371	2019-08-08T16:28:59.107330-05:00	NA	not reported	7th	N0	0	NA	NA	NA	NA	Not Reported	NA	4c2001db-c7f8-5673-af4f-a7ee597407d6	NA	NA	63	-23371	1949	NA	f461368c-d4d6-545b-9d0d-1e8f954ce235	Alive	not hispanic or latino	female	white	NA	NA	NA	Radiation Therapy, NOS
TCGA-E9-A6HE	Lobular carcinoma, NOS	not reported	MX	not reported	T3	Stage IIIC	Breast, NOS	No	no	8520/3	C50.9	released	No	not reported	9399cb1b-030d-56bb-8a2d-91531bae2a62	Breast, NOS	847	NA	stage iiic	2012	16697	2019-08-08T16:28:59.107330-05:00	NA	not reported	7th	N3	0	NA	NA	NA	NA	Not Reported	NA	4604ea5b-d0c1-5b11-9d24-96db094df768	NA	NA	45	-16697	1967	NA	4fb75b6c-397a-576c-8935-be46db1996e4	Alive	not hispanic or latino	female	white	NA	NA	NA	Radiation Therapy, NOS
TCGA-EW-A1IW	Lobular carcinoma, NOS	not reported	MX	not reported	T2	Stage IIB	Breast, NOS	No	no	8520/3	C50.9	released	No	not reported	8cafa6ba-2732-5c82-b2e4-798162a005cc	Breast, NOS	371	NA	stage iib	2010	29529	2019-08-08T16:29:25.533211-05:00	NA	not reported	7th	N1a	0	NA	NA	NA	NA	Not Reported	NA	124c6c50-fbbf-5610-ac58-0c52574ca0df	NA	NA	80	-29529	1930	NA	2cd46bce-530d-593c-9d4d-65396226e642	Alive	hispanic or latino	female	white	NA	NA	NA	Radiation Therapy, NOS
TCGA-EW-A1IX	Infiltrating lobular mixed with other types of carcinoma	not reported	MX	not reported	T1b	Stage IIA	Breast, NOS	No	no	8524/3	C50.9	released	No	not reported	e81756a3-fda2-5186-9920-7ad89922247c	Breast, NOS	1208	NA	stage iia	2008	17597	2019-08-08T16:29:25.533211-05:00	NA	not reported	6th	N1a	0	NA	NA	NA	NA	Not Reported	NA	50b42896-6f1d-530f-b6c9-f846efd907ed	NA	NA	48	-17597	1960	NA	4e588c0a-bacf-5319-a54b-f5617f89a4ae	Alive	hispanic or latino	female	asian	NA	NA	NA	Radiation Therapy, NOS
TCGA-EW-A1IY	Infiltrating duct carcinoma, NOS	not reported	MX	not reported	T1c	Stage I	Breast, NOS	No	no	8500/3	C50.9	released	No	not reported	d7168e8b-f547-52f5-b683-018a83f6564c	Breast, NOS	258	NA	stage i	2009	14122	2019-08-08T16:29:25.533211-05:00	NA	not reported	6th	N0	0	NA	NA	NA	NA	Not Reported	NA	59e3d8cc-b32b-51ef-9e4d-e875aaed4ba3	NA	NA	38	-14122	1971	NA	2107560a-36be-58b7-ac37-795c1b2b7b4c	Alive	not hispanic or latino	female	asian	NA	NA	NA	Radiation Therapy, NOS
TCGA-EW-A1IZ	Infiltrating duct carcinoma, NOS	not reported	MX	not reported	T2	Stage IIIA	Breast, NOS	No	no	8500/3	C50.9	released	No	not reported	2674e5ba-0a46-5ebe-abd6-b53f5ca1f211	Breast, NOS	554	NA	stage iiia	2010	19706	2019-08-08T16:29:25.533211-05:00	NA	not reported	7th	N2a	0	NA	NA	NA	NA	Not Reported	NA	5b9633a1-8e80-57ae-b6be-ba77b03f9b77	NA	NA	53	-19706	1957	NA	c97b5819-603a-5ff1-95ae-113c7a66f6ef	Alive	not hispanic or latino	female	white	NA	NA	NA	Radiation Therapy, NOS
TCGA-EW-A1J1	Infiltrating duct carcinoma, NOS	not reported	M0	not reported	T2	Stage IIB	Breast, NOS	No	no	8500/3	C50.9	released	No	not reported	da790565-d952-5ff2-a023-1fd850aca5a8	Breast, NOS	575	NA	stage iib	2010	14122	2019-08-08T16:29:25.533211-05:00	NA	not reported	7th	N1a	0	NA	NA	NA	NA	Not Reported	NA	23f54544-c87e-5c68-8d8f-a8b91a05057a	NA	NA	38	-14122	1972	NA	1918fb7f-570f-53ae-bf38-5c6fc151866b	Alive	hispanic or latino	female	white	NA	NA	NA	Radiation Therapy, NOS
TCGA-EW-A1J2	Lobular carcinoma, NOS	not reported	MX	not reported	T1c	NA	Breast, NOS	No	no	8520/3	C50.9	released	No	not reported	35a9fe27-aa61-5de8-a48e-4473cb3a2f40	Breast, NOS	403	NA	not reported	2010	18558	2019-08-08T16:29:25.533211-05:00	NA	not reported	7th	N1mi	0	NA	NA	NA	NA	Not Reported	NA	70da1761-6ecb-52aa-8bd5-2e2d7d7ce1b8	NA	NA	50	-18558	1960	NA	5c1fb423-7eb2-5079-8201-a43b2fb8f7f7	Alive	not hispanic or latino	female	black or african american	NA	NA	NA	Radiation Therapy, NOS
TCGA-EW-A1J3	Lobular carcinoma, NOS	not reported	M0	not reported	T1c	Stage IA	Breast, NOS	No	no	8520/3	C50.9	released	No	not reported	1dc4a35b-e2c6-5a9e-9183-7a6d3f2acc6f	Breast, NOS	504	NA	stage ia	2010	22332	2019-08-08T16:29:25.533211-05:00	NA	not reported	7th	N0	0	NA	NA	NA	NA	Not Reported	NA	cf9c8dc7-7401-52ed-aa10-ff1142f0b3bc	NA	NA	61	-22332	1949	NA	5b60da0d-4f5c-5746-87d4-ba45aba13265	Alive	hispanic or latino	female	white	NA	NA	NA	Radiation Therapy, NOS
TCGA-EW-A1J5	Lobular carcinoma, NOS	not reported	M0	not reported	T3	Stage IIB	Breast, NOS	No	no	8520/3	C50.9	released	No	not reported	327e09f0-fb81-550d-9e08-efcea5a01f48	Breast, NOS	477	NA	stage iib	2010	21559	2019-08-08T16:29:25.533211-05:00	NA	not reported	7th	N0 (i-)	0	NA	NA	NA	NA	Not Reported	NA	0a173158-1a29-5275-b5c3-defebe670152	NA	NA	59	-21559	1951	NA	f6126ddf-6490-53cb-9826-7727bff12faf	Alive	not hispanic or latino	female	white	NA	NA	NA	Radiation Therapy, NOS
TCGA-EW-A1J6	Infiltrating duct carcinoma, NOS	not reported	M0	not reported	T1c	Stage I	Breast, NOS	No	no	8500/3	C50.9	released	No	not reported	4562c500-f3dc-5b65-98c8-f0eea19f7cd4	Breast, NOS	875	NA	stage i	2009	25830	2019-08-08T16:29:25.533211-05:00	NA	not reported	6th	N0 (i-)	0	NA	NA	NA	NA	Not Reported	NA	61253528-abfc-5416-ad33-cf6b36384b2e	NA	NA	70	-25830	1939	NA	1ca873b5-07dc-52f0-8f0d-db9e0e44b4fd	Alive	hispanic or latino	female	white	NA	NA	NA	Radiation Therapy, NOS
TCGA-EW-A1OV	Infiltrating duct carcinoma, NOS	not reported	MX	not reported	T2	Stage IIB	Breast, NOS	No	no	8500/3	C50.9	released	No	not reported	9fd446d2-fc22-599b-888d-472c8a93e3d0	Breast, NOS	789	NA	stage iib	2009	20764	2019-08-08T16:29:25.533211-05:00	NA	not reported	6th	N1mi	0	NA	NA	NA	NA	Not Reported	NA	e74a29e8-ea4d-514a-a8d6-c66e160c15c3	NA	NA	56	-20764	1953	NA	4682abf2-e8ef-5cd2-807f-d35c7fab55f8	Alive	hispanic or latino	female	white	NA	NA	NA	Radiation Therapy, NOS
TCGA-EW-A1OW	Basal cell carcinoma, NOS	not reported	MX	not reported	T2	Stage IIA	Breast, NOS	No	no	8090/3	C50.9	released	No	not reported	fcbf7e04-a55a-5ac5-831c-d9d87f66fdd0	Breast, NOS	694	NA	stage iia	2009	21465	2019-08-08T16:29:25.533211-05:00	NA	not reported	6th	N0	0	NA	NA	NA	NA	Not Reported	NA	da111ec2-c174-54d5-b052-23e9567015ba	NA	NA	58	-21465	1951	NA	d3135c0a-617d-59d6-b818-f42510ac3f90	Alive	not hispanic or latino	female	black or african american	NA	NA	NA	Radiation Therapy, NOS
TCGA-EW-A1OX	Infiltrating duct mixed with other types of carcinoma	not reported	MX	not reported	T2	Stage IIA	Breast, NOS	No	no	8523/3	C50.9	released	No	not reported	f4f9a2cf-075e-57a9-b6bf-70795a2ff9ac	Breast, NOS	911	NA	stage iia	2009	15837	2019-08-08T16:29:25.533211-05:00	NA	not reported	6th	N0	0	NA	NA	NA	NA	Not Reported	NA	82574093-b503-5535-b59e-572b0ec3c5b2	NA	NA	43	-15837	1966	NA	bc11c8d9-1c65-5219-a863-8a2af7c9a5ea	Alive	hispanic or latino	female	white	NA	NA	NA	Radiation Therapy, NOS
TCGA-EW-A1OZ	Infiltrating duct carcinoma, NOS	not reported	M0	not reported	T2	Stage IIA	Breast, NOS	No	no	8500/3	C50.9	released	No	not reported	cea54277-a167-5393-a74f-165a9e49a50c	Breast, NOS	1229	NA	stage iia	2008	20664	2019-08-08T16:29:25.533211-05:00	NA	not reported	6th	N0 (i-)	0	NA	NA	NA	NA	Not Reported	NA	1f66f7af-6320-59a3-a834-3d493fe7107f	NA	NA	56	-20664	1952	NA	2437898a-a243-57d2-b755-39786546e1a5	Alive	not hispanic or latino	female	black or african american	NA	NA	NA	Radiation Therapy, NOS
TCGA-EW-A1P0	Infiltrating duct mixed with other types of carcinoma	not reported	MX	not reported	T2	Stage IIB	Breast, NOS	No	no	8523/3	C50.9	released	No	not reported	9c18e1c7-d32d-55f0-ae93-2ae2987c7a8e	Breast, NOS	1251	NA	stage iib	2008	20107	2019-08-08T16:29:25.533211-05:00	NA	not reported	6th	N1b	0	NA	NA	NA	NA	Not Reported	NA	e60bc7c5-ae34-5848-9262-7e7e5bfe51c9	NA	NA	55	-20107	1953	NA	109f3dc7-f62a-5dca-ac7c-0ba6aac48aae	Alive	not hispanic or latino	female	white	NA	NA	NA	Radiation Therapy, NOS
TCGA-EW-A1P3	Infiltrating duct carcinoma, NOS	not reported	MX	not reported	T2	Stage IIA	Breast, NOS	No	yes	8500/3	C50.9	released	Not Reported	not reported	29470450-0967-59d1-8c8f-3e1faaca242a	Breast, NOS	1611	NA	stage iia	2008	17637	2019-08-08T16:29:25.533211-05:00	NA	not reported	6th	N0	0	NA	NA	NA	NA	Not Reported	NA	d173acec-2b6c-57b8-b57b-b3004232a4b2	NA	NA	48	-17637	1960	NA	30c328d9-50cc-5135-8e8a-63899ff66c3e	Alive	not hispanic or latino	female	white	NA	NA	NA	Radiation Therapy, NOS
TCGA-EW-A1P4	Medullary carcinoma, NOS	not reported	M0	not reported	T2	Stage IIA	Breast, NOS	No	no	8510/3	C50.9	released	No	not reported	3fe0871e-a076-55cf-9579-451a3968faf9	Breast, NOS	907	NA	stage iia	2009	15989	2019-08-08T16:29:25.533211-05:00	NA	not reported	6th	N0 (i-)	0	NA	NA	NA	NA	Not Reported	NA	874b59bc-fd3a-56a4-bf1d-6e7d11c81f53	NA	NA	43	-15989	1966	NA	ffe90c6d-c381-5e6d-a069-c775f592b514	Alive	hispanic or latino	female	white	NA	NA	NA	Radiation Therapy, NOS
TCGA-EW-A1P5	Infiltrating duct carcinoma, NOS	not reported	M0	not reported	T2	Stage IIB	Breast, NOS	No	no	8500/3	C50.9	released	No	not reported	3c873eab-e5e1-5810-b9f6-12e3682c344d	Breast, NOS	703	NA	stage iib	2010	28177	2019-08-08T16:29:25.533211-05:00	NA	not reported	7th	N1a	0	NA	NA	NA	NA	Not Reported	NA	c4850ad3-b370-5792-8a59-134ae8e71d2c	NA	NA	77	-28177	1933	NA	48c9074f-a7e7-5dc9-8d49-9792a9061bf9	Alive	not hispanic or latino	female	white	NA	NA	NA	Radiation Therapy, NOS
TCGA-EW-A1P6	Infiltrating duct carcinoma, NOS	not reported	M0	not reported	T2	Stage IIB	Breast, NOS	No	no	8500/3	C50.9	released	No	not reported	303c74ef-7e51-51eb-a69d-49837646031f	Breast, NOS	562	NA	stage iib	2010	23485	2019-08-08T16:29:25.533211-05:00	NA	not reported	7th	N1a	0	NA	NA	NA	NA	Not Reported	NA	c2899be9-e5fe-52cd-9d61-03055e421c1a	NA	NA	64	-23485	1946	NA	3a86bb57-cc91-578d-9d0c-fe2098497082	Alive	hispanic or latino	female	white	NA	NA	NA	Radiation Therapy, NOS
TCGA-EW-A1P8	Infiltrating duct carcinoma, NOS	not reported	M0	not reported	T2	Stage IIIC	Breast, NOS	No	no	8500/3	C50.9	released	No	not reported	3af8b3ee-2d0c-538f-8cc3-aa68d8ff67c8	Breast, NOS	NA	NA	stage iiic	2010	21501	2019-08-08T16:29:25.533211-05:00	NA	not reported	7th	N3b	0	NA	NA	NA	NA	Not Reported	NA	bdabd234-1a04-5103-947e-86977adf7524	NA	NA	58	-21501	1952	2010	7797bfff-2cfd-5e44-9201-4f802f09b7c4	Dead	not hispanic or latino	female	white	239	NA	NA	Radiation Therapy, NOS
TCGA-EW-A1PA	Infiltrating duct carcinoma, NOS	not reported	M0	not reported	T2	Stage IIB	Breast, NOS	No	no	8500/3	C50.9	released	No	not reported	65badc3e-07c1-5f31-97f4-3198d0cd45eb	Breast, NOS	575	NA	stage iib	2010	21837	2019-08-08T16:29:25.533211-05:00	NA	not reported	7th	N1a	0	NA	NA	NA	NA	Not Reported	NA	88c83585-48cb-542d-bb4f-92ece20e25e2	NA	NA	59	-21837	1951	NA	6c1ef4ca-a13b-5101-98b7-875755c9e4b5	Alive	hispanic or latino	female	white	NA	NA	NA	Radiation Therapy, NOS
TCGA-EW-A1PB	Infiltrating duct carcinoma, NOS	not reported	MX	not reported	T3	Stage IIIA	Breast, NOS	No	no	8500/3	C50.9	released	No	not reported	f08bcffc-5dd0-5c03-a00c-1d00a2b457a7	Breast, NOS	608	NA	stage iiia	2009	25770	2019-08-08T16:29:25.533211-05:00	NA	not reported	6th	N1a	0	NA	NA	NA	NA	Not Reported	NA	d051d4cb-f495-549c-9acd-f7c94c9111b9	NA	NA	70	-25770	1939	NA	abe50d5f-70a4-57ce-9cd4-4c650bc460a9	Alive	not hispanic or latino	female	black or african american	NA	NA	NA	Radiation Therapy, NOS
TCGA-EW-A1PC	Infiltrating duct carcinoma, NOS	not reported	MX	not reported	T3	Stage IIB	Breast, NOS	No	no	8500/3	C50.9	released	No	not reported	102cd71e-5a56-53f9-acf7-143c23589b1b	Breast, NOS	187	NA	stage iib	2011	24434	2019-08-08T16:29:25.533211-05:00	NA	not reported	7th	N0 (i-)	0	NA	NA	NA	NA	Not Reported	NA	4e22d602-db26-5939-865a-d6ccd7f23e94	NA	NA	66	-24434	1945	NA	ccd3b04a-20b4-53e2-b798-ede39284c0b6	Alive	not hispanic or latino	female	black or african american	NA	NA	NA	Radiation Therapy, NOS
TCGA-EW-A1PE	Intraductal micropapillary carcinoma	not reported	M0	not reported	T1c	Stage IIA	Breast, NOS	No	no	8507/3	C50.9	released	No	not reported	bbdfbcb0-577b-52aa-8a41-e2e493090524	Breast, NOS	320	NA	stage iia	2011	20694	2019-08-08T16:29:25.533211-05:00	NA	not reported	7th	N1a	0	NA	NA	NA	NA	Not Reported	NA	94dcbbd7-f4b8-5196-b4a7-187ccc9a4af2	NA	NA	56	-20694	1955	NA	7acd804a-694d-5a9b-8071-4a9beb50b7cb	Alive	hispanic or latino	female	white	NA	NA	NA	Radiation Therapy, NOS
TCGA-EW-A1PF	Infiltrating duct carcinoma, NOS	not reported	M0	not reported	T1c	Stage IA	Breast, NOS	No	no	8500/3	C50.9	released	No	not reported	fc625303-3c7f-5707-aa38-5efda34fd44d	Breast, NOS	439	NA	stage ia	2010	18384	2019-08-08T16:29:25.533211-05:00	NA	not reported	7th	N0	0	NA	NA	NA	NA	Not Reported	NA	446b1dab-4cde-54b2-bdc5-a71dd10919bd	NA	NA	50	-18384	1960	NA	6de5dba5-bc57-5c60-8c87-6bd8c6859591	Alive	hispanic or latino	female	white	NA	NA	NA	Radiation Therapy, NOS
TCGA-EW-A1PH	Infiltrating duct carcinoma, NOS	not reported	M0	not reported	T1c	Stage IIA	Breast, NOS	No	no	8500/3	C50.9	released	No	not reported	3cda5a39-eef6-5e54-8833-03ac340a013d	Breast, NOS	607	NA	stage iia	2010	19073	2019-08-08T16:29:25.533211-05:00	NA	not reported	7th	N1a	0	NA	NA	NA	NA	Not Reported	NA	86460a64-cfca-50a7-8637-f22b29373265	NA	NA	52	-19073	1958	NA	b4df9bc2-cb23-552b-b065-ab3e94a34b84	Alive	hispanic or latino	female	white	NA	NA	NA	Radiation Therapy, NOS
TCGA-EW-A2FR	Infiltrating duct carcinoma, NOS	not reported	MX	not reported	T1b	Stage IIIC	Breast, NOS	No	no	8500/3	C50.9	released	No	not reported	79688542-8377-5287-874d-f13e3aa48077	Breast, NOS	1673	NA	stage iiic	2008	21628	2019-08-08T16:29:25.533211-05:00	NA	not reported	6th	N3a	0	NA	NA	NA	NA	Not Reported	NA	d53bb7b5-207d-51c5-acaf-0c3ddc204d82	NA	NA	59	-21628	1949	NA	03feb08b-a8ab-546f-a171-00c72b3f07e2	Alive	not hispanic or latino	female	black or african american	NA	NA	NA	Radiation Therapy, NOS
TCGA-EW-A2FS	Infiltrating duct carcinoma, NOS	not reported	MX	not reported	T2	Stage IIB	Breast, NOS	No	no	8500/3	C50.9	released	No	not reported	0f059577-3ee3-51f0-980f-d28cf9d3a4c1	Breast, NOS	1604	NA	stage iib	2008	15302	2019-08-08T16:29:25.533211-05:00	NA	not reported	6th	N1mi	0	NA	NA	NA	NA	Not Reported	NA	d2c825f7-88c2-5bb4-a50d-ed917ee0c9f5	NA	NA	41	-15302	1967	NA	cd436b29-ec64-5b39-ba43-13a3136933ad	Alive	not hispanic or latino	female	black or african american	NA	NA	NA	Radiation Therapy, NOS
TCGA-EW-A2FV	Intraductal micropapillary carcinoma	not reported	MX	not reported	T3	Stage IIIC	Breast, NOS	No	no	8507/3	C50.9	released	No	not reported	288ebd5c-a6ef-53c7-a223-c69cdb9e047a	Breast, NOS	788	NA	stage iiic	2011	14316	2019-08-08T16:29:25.533211-05:00	NA	not reported	7th	N3a	0	NA	NA	NA	NA	Not Reported	NA	ac9075f9-9aba-5138-8c9e-8b0a640cffed	NA	NA	39	-14316	1972	NA	c92d2b07-8d55-55ed-94de-d4ca4eac160f	Alive	hispanic or latino	female	white	NA	NA	NA	Radiation Therapy, NOS
TCGA-EW-A2FW	Intraductal papillary adenocarcinoma with invasion	not reported	MX	not reported	T2	Stage IIA	Breast, NOS	Not Reported	no	8503/3	C50.9	released	No	not reported	43bd9b05-5a2e-5067-9eef-955530fe0099	Breast, NOS	672	NA	stage iia	2011	19085	2019-08-08T16:29:25.533211-05:00	NA	not reported	7th	N0 (i-)	0	NA	NA	NA	NA	Not Reported	NA	cfbefdd3-5cbf-5209-93b7-26994f90a1bb	NA	NA	52	-19085	1959	NA	886fc920-0690-5ba1-ab58-9463b3e8b21d	Alive	hispanic or latino	female	white	NA	NA	NA	Radiation Therapy, NOS
TCGA-EW-A3E8	Lobular carcinoma, NOS	not reported	MX	not reported	T3	Stage IIB	Breast, NOS	No	no	8520/3	C50.9	released	No	not reported	9e470864-b3dd-544f-900f-27fff2f39a41	Breast, NOS	1035	NA	stage iib	2011	21922	2019-08-08T16:29:25.533211-05:00	NA	not reported	7th	N0	0	NA	NA	NA	NA	Not Reported	NA	11b9764f-9813-55fa-b45c-d936067a5ae8	NA	NA	60	-21922	1951	NA	d683789e-0d36-5c9a-b088-14e28e8d3388	Alive	hispanic or latino	female	white	NA	NA	NA	Radiation Therapy, NOS
TCGA-EW-A3U0	Infiltrating duct carcinoma, NOS	not reported	M0	not reported	T3	Stage IIIA	Breast, NOS	No	no	8500/3	C50.9	released	No	not reported	86b49e85-0e68-520a-b96a-1a736d95a013	Breast, NOS	532	NA	stage iiia	2011	22520	2019-08-08T16:29:25.533211-05:00	NA	not reported	7th	N1a	0	NA	NA	NA	NA	Not Reported	NA	fdef2533-3aeb-51a1-b828-8d7d9a432846	NA	NA	61	-22520	1950	NA	31cdfb78-72a9-5778-9f03-d14ab85025c4	Alive	not hispanic or latino	female	black or african american	NA	NA	NA	Radiation Therapy, NOS
TCGA-EW-A423	Lobular carcinoma, NOS	not reported	MX	not reported	T2	Stage IIA	Breast, NOS	No	no	8520/3	C50.9	released	No	not reported	cc6df66c-0b4c-5bf9-abdb-0c6bbe55d03d	Breast, NOS	533	NA	stage iia	2012	27627	2019-08-08T16:29:25.533211-05:00	NA	not reported	7th	N0	0	NA	NA	NA	NA	Not Reported	NA	30a61136-d5e7-591e-8442-2bc8d7444db6	NA	NA	75	-27627	1937	NA	f52eb95b-0c92-5abe-abf4-30edf136f212	Alive	hispanic or latino	female	white	NA	NA	NA	Radiation Therapy, NOS
TCGA-EW-A424	Lobular carcinoma, NOS	not reported	MX	not reported	T3	Stage IIIA	Breast, NOS	No	no	8520/3	C50.9	released	No	not reported	83af7254-a1db-575d-927f-97adcc94deed	Breast, NOS	715	NA	stage iiia	2012	18850	2019-08-08T16:29:25.533211-05:00	NA	not reported	7th	N1	0	NA	NA	NA	NA	Not Reported	NA	26febf05-d0f8-5bb3-9b33-001ea1a6078b	NA	NA	51	-18850	1961	NA	c8c18444-320a-592d-9056-f7af44b7acda	Alive	hispanic or latino	female	white	NA	NA	NA	Radiation Therapy, NOS
TCGA-EW-A6S9	Infiltrating duct carcinoma, NOS	not reported	M0	not reported	T1c	Stage IIA	Breast, NOS	No	no	8500/3	C50.9	released	No	not reported	77fe4ec4-60ce-5ec7-b551-0d81f8bedc16	Breast, NOS	463	NA	stage iia	2013	12755	2019-08-08T16:29:25.533211-05:00	NA	not reported	7th	N1	0	NA	NA	NA	NA	Not Reported	NA	7ac68dc9-b56b-594c-b0e9-cc51b55b2ca2	NA	NA	34	-12755	1979	NA	0ddd4b08-a479-56ec-83ab-a8bf64ccf87d	Alive	not hispanic or latino	female	black or african american	NA	NA	NA	Radiation Therapy, NOS
TCGA-EW-A6SB	Infiltrating duct carcinoma, NOS	not reported	M0	not reported	T2	Stage II	Breast, NOS	No	no	8500/3	C50.9	released	No	not reported	c01185fa-668d-58e2-a255-dea08d7b5573	Breast, NOS	760	NA	stage ii	2012	22844	2019-08-08T16:29:25.533211-05:00	NA	not reported	7th	N0	0	NA	NA	NA	NA	Not Reported	NA	4822a856-6998-5b55-b45e-5f7bff988a13	NA	NA	62	-22844	1950	NA	5ca6f8f4-872c-5df9-9577-8f686bae03d0	Alive	not hispanic or latino	female	black or african american	NA	NA	NA	Radiation Therapy, NOS
TCGA-EW-A6SC	Lobular carcinoma, NOS	not reported	M0	not reported	T2	Stage IIA	Breast, NOS	No	no	8520/3	C50.9	released	No	not reported	4fd14957-e4d5-591e-bc2e-7065381ff363	Breast, NOS	952	NA	stage iia	2012	21918	2019-08-08T16:29:25.533211-05:00	NA	not reported	7th	N0	0	NA	NA	NA	NA	Not Reported	NA	e07de1f3-1a71-5ae2-ac63-53c90cd77ac8	NA	NA	60	-21918	1952	NA	ced04884-64f6-501d-9702-fbbfbde838b6	Alive	not hispanic or latino	female	black or african american	NA	NA	NA	Radiation Therapy, NOS
TCGA-EW-A6SD	Infiltrating duct carcinoma, NOS	not reported	M0	not reported	T2	Stage IIB	Breast, NOS	No	no	8500/3	C50.9	released	No	not reported	61d5e200-61fe-5db1-ab90-875aff128808	Breast, NOS	1010	NA	stage iib	2012	12006	2019-08-08T16:29:25.533211-05:00	NA	not reported	7th	N1a	0	NA	NA	NA	NA	Not Reported	NA	bbdf9662-707b-5a88-8dee-e25ce558e76c	NA	NA	32	-12006	1980	NA	8d248aa1-0566-531d-a158-cd804c490b61	Alive	hispanic or latino	female	black or african american	NA	NA	NA	Radiation Therapy, NOS
TCGA-GI-A2C8	Infiltrating duct carcinoma, NOS	not reported	MX	not reported	T4b	Stage IIIB	Breast, NOS	Yes	no	8500/3	C50.9	released	No	not reported	313cbbc8-5205-54d1-a329-35250a907ffb	Breast, NOS	225	NA	stage iiib	2004	23103	2019-08-08T16:29:25.533211-05:00	NA	not reported	6th	N0	0	NA	NA	NA	NA	Not Reported	NA	dd44fd41-e765-5578-903f-258de7fe1c9f	NA	NA	63	-23103	1941	NA	7ab4be87-cb9d-5781-bb8b-83a7908ded4e	Alive	not hispanic or latino	female	white	NA	NA	NA	Radiation Therapy, NOS
TCGA-GI-A2C9	Infiltrating duct carcinoma, NOS	not reported	MX	not reported	T3	Stage IIB	Breast, NOS	No	no	8500/3	C50.9	released	No	not reported	c92a5ffe-0e7b-5f91-8351-080845953cfa	Breast, NOS	3342	NA	stage iib	2003	21534	2019-08-08T16:29:25.533211-05:00	NA	not reported	6th	N0	0	NA	NA	NA	NA	Not Reported	NA	814cda5b-0f05-52b9-9060-db7599e9f31c	NA	NA	58	-21534	1945	NA	8d1e7060-34e8-593c-a876-5520b9222b92	Alive	not hispanic or latino	female	black or african american	NA	NA	NA	Radiation Therapy, NOS
TCGA-GM-A2D9	Infiltrating duct carcinoma, NOS	not reported	M0	not reported	T1c	Stage I	Breast, NOS	No	no	8500/3	C50.9	released	No	not reported	fc0f8476-dfce-5ac6-a4e1-99bcbf7a8ec0	Breast, NOS	NA	NA	stage i	2006	25490	2019-08-08T16:29:25.533211-05:00	NA	not reported	6th	N0 (i-)	0	NA	NA	NA	NA	Not Reported	NA	5a9971d7-3d53-5c09-b06f-cb79d46a388d	NA	NA	69	-25490	1937	2010	734ff634-c830-51c9-a8f4-901a4a10e2ac	Dead	not hispanic or latino	female	white	1812	NA	NA	Radiation Therapy, NOS
TCGA-GM-A2DA	Infiltrating duct carcinoma, NOS	not reported	M0	not reported	T2	Stage IIB	Breast, NOS	No	no	8500/3	C50.9	released	No	not reported	6a9815bc-f72c-5d73-97b0-3362ff597039	Breast, NOS	5909	NA	stage iib	1993	16854	2019-08-08T16:29:25.533211-05:00	NA	not reported	4th	N1b	0	NA	NA	NA	NA	Not Reported	NA	f48e13db-4433-5386-9411-8e46854ae0c4	NA	NA	46	-16854	1947	NA	5fce8538-b3ce-50ba-9e12-7fdcc454ec93	Dead	not hispanic or latino	female	white	6593	NA	NA	Radiation Therapy, NOS
TCGA-GM-A2DB	Infiltrating duct carcinoma, NOS	not reported	M0	not reported	T2	Stage IIA	Breast, NOS	No	no	8500/3	C50.9	released	No	not reported	559485c2-fba3-58fd-9418-ca876775e23c	Breast, NOS	2406	NA	stage iia	2006	22883	2019-08-08T16:29:25.533211-05:00	NA	not reported	6th	N0 (i-)	0	NA	NA	NA	NA	Not Reported	NA	fea71389-470b-5eec-b18b-753c429fbef8	NA	NA	62	-22883	1944	NA	4fa7f14e-4009-5ec3-9ad5-8e2fe0a33684	Alive	not hispanic or latino	female	white	NA	NA	NA	Radiation Therapy, NOS
TCGA-GM-A2DC	Infiltrating duct carcinoma, NOS	not reported	M0	not reported	T1c	Stage IIA	Breast, NOS	No	no	8500/3	C50.9	released	No	not reported	fa5cbcb4-9771-5765-b4f5-6e89cfc32997	Breast, NOS	2535	NA	stage iia	2006	21122	2019-08-08T16:29:25.533211-05:00	NA	not reported	6th	N1a	0	NA	NA	NA	NA	Not Reported	NA	00e7362e-d3a7-5911-987b-97c2499f1a1a	NA	NA	57	-21122	1949	NA	16b7cee5-0b6c-5c04-9c22-53abdd93ca3a	Alive	not hispanic or latino	female	white	NA	NA	NA	Radiation Therapy, NOS
TCGA-GM-A2DF	Infiltrating duct carcinoma, NOS	not reported	M0	not reported	T1c	Stage IIA	Breast, NOS	No	no	8500/3	C50.9	released	No	not reported	5ccf79b6-5b42-5cf4-a64f-28ed8d0f4012	Breast, NOS	2155	NA	stage iia	2007	19614	2019-08-08T16:29:50.543582-05:00	NA	not reported	6th	N1a	0	NA	NA	NA	NA	Not Reported	NA	ba492eda-0c1b-5409-807a-6fcda77e510d	NA	NA	53	-19614	1954	NA	7c64a75d-f3ac-5f9f-93c1-812e27a1e1b7	Alive	not hispanic or latino	female	black or african american	NA	NA	NA	Radiation Therapy, NOS
TCGA-GM-A2DH	Infiltrating duct carcinoma, NOS	not reported	M0	not reported	T1c	Stage I	Breast, NOS	No	no	8500/3	C50.9	released	No	not reported	4e9c621b-dedd-5a5b-a8ed-50aea443c270	Breast, NOS	2193	NA	stage i	2007	21344	2019-08-08T16:29:50.543582-05:00	NA	not reported	6th	N0 (i+)	0	NA	NA	NA	NA	Not Reported	NA	c4698560-6fc8-5348-beff-a69a9718815d	NA	NA	58	-21344	1949	NA	eb82df46-1607-589a-952b-1218a75dbe30	Alive	not hispanic or latino	female	white	NA	NA	NA	Radiation Therapy, NOS
TCGA-GM-A2DI	Infiltrating duct carcinoma, NOS	not reported	M0	not reported	T1c	Stage I	Breast, NOS	No	no	8500/3	C50.9	released	No	not reported	f5422a49-0618-542f-a1ae-75e679b46e7c	Breast, NOS	2590	NA	stage i	2005	19030	2019-08-08T16:29:50.543582-05:00	NA	not reported	6th	N0 (i+)	0	NA	NA	NA	NA	Not Reported	NA	1b6823ae-b286-55b6-8e6e-38fe62b2c1f2	NA	NA	52	-19030	1953	NA	7aa40b45-d8c2-5bdb-b7bb-f08fc749990d	Alive	not hispanic or latino	female	white	NA	NA	NA	Radiation Therapy, NOS
TCGA-GM-A2DK	Infiltrating duct carcinoma, NOS	not reported	M0	not reported	T1c	Stage I	Breast, NOS	No	no	8500/3	C50.9	released	No	not reported	90c45af3-d025-5354-84a8-d337dc6b4346	Breast, NOS	2645	NA	stage i	2005	21198	2019-08-08T16:29:50.543582-05:00	NA	not reported	6th	N0 (i-)	0	NA	NA	NA	NA	Not Reported	NA	1db034e5-6d25-5220-a708-9cfaf73d1ed2	NA	NA	58	-21198	1947	NA	08a8a713-496e-52f0-92d5-cbff4fdbbf95	Alive	not hispanic or latino	female	white	NA	NA	NA	Radiation Therapy, NOS
TCGA-GM-A2DL	Infiltrating duct carcinoma, NOS	not reported	M0	not reported	T1c	Stage I	Breast, NOS	No	no	8500/3	C50.9	released	No	not reported	3185a0c5-83e5-5523-81b8-6973708a75b9	Breast, NOS	3519	NA	stage i	2003	18475	2019-08-08T16:29:50.543582-05:00	NA	not reported	6th	N0 (i-)	0	NA	NA	NA	NA	Not Reported	NA	1372c3a9-f3c9-53ac-a11f-599c021eb909	NA	NA	50	-18475	1953	NA	b94ef8b8-13a9-57c5-90ec-d7b640476cd4	Alive	not hispanic or latino	female	white	NA	NA	NA	Radiation Therapy, NOS
TCGA-GM-A2DM	Infiltrating duct carcinoma, NOS	not reported	M0	not reported	T2	Stage IIA	Breast, NOS	No	no	8500/3	C50.9	released	No	not reported	df5e957f-bf1c-544b-b85b-48c4bfa51ebf	Breast, NOS	3226	NA	stage iia	2004	21160	2019-08-08T16:29:50.543582-05:00	NA	not reported	6th	N0 (i-)	0	NA	NA	NA	NA	Not Reported	NA	9f0b986d-a217-5896-bfc3-8caaa2d03399	NA	NA	57	-21160	1947	NA	fbba9976-274d-5465-a334-e87057e5e7de	Alive	hispanic or latino	female	white	NA	NA	NA	Radiation Therapy, NOS
TCGA-GM-A2DN	Infiltrating duct carcinoma, NOS	not reported	M0	not reported	T2	Stage IIA	Breast, NOS	No	no	8500/3	C50.9	released	No	not reported	57c58553-d1d1-5e0d-a22a-77250df32b0c	Breast, NOS	3091	NA	stage iia	2004	21288	2019-08-08T16:29:50.543582-05:00	NA	not reported	6th	N0 (i-)	0	NA	NA	NA	NA	Not Reported	NA	5edac88e-386b-5835-b313-e00f52515d04	NA	NA	58	-21288	1946	NA	91a06fb2-6332-5200-9272-277ead42fa42	Alive	not hispanic or latino	female	white	NA	NA	NA	Radiation Therapy, NOS
TCGA-GM-A2DO	Lobular carcinoma, NOS	not reported	M0	not reported	T1c	Stage I	Breast, NOS	No	no	8520/3	C50.9	released	No	not reported	ab869d96-8f6c-508e-bba2-794aa8e592d6	Breast, NOS	2596	NA	stage i	2006	19842	2019-08-08T16:29:50.543582-05:00	NA	not reported	6th	N0 (i-)	0	NA	NA	NA	NA	Not Reported	NA	3ecea120-cb8f-5365-954a-b3ac1d8b68ca	NA	NA	54	-19842	1952	NA	3a204d93-1cc6-5334-9b62-1aac91e27571	Alive	not hispanic or latino	female	black or african american	NA	NA	NA	Radiation Therapy, NOS
TCGA-GM-A3NW	Lobular carcinoma, NOS	not reported	M0	not reported	T2	Stage IIA	Breast, NOS	No	no	8520/3	C50.9	released	No	not reported	cf6e5635-819f-5ea0-ae9f-e5518847d546	Breast, NOS	3361	NA	stage iia	2003	23041	2019-08-08T16:29:50.543582-05:00	NA	not reported	6th	N0 (i-)	0	NA	NA	NA	NA	Not Reported	NA	dae18a2c-f89c-565b-a4a2-d3783ff59cb9	NA	NA	63	-23041	1940	NA	a49fde2b-ffc3-5089-af79-e99c729bd19c	Alive	not hispanic or latino	female	white	NA	NA	NA	Radiation Therapy, NOS
TCGA-GM-A3NY	Lobular carcinoma, NOS	not reported	M0	not reported	T2	Stage IIB	Breast, NOS	No	no	8520/3	C50.9	released	No	not reported	df8bdf15-07a7-5a64-8680-23fef7fde548	Breast, NOS	1162	NA	stage iib	2009	26642	2019-08-08T16:29:50.543582-05:00	NA	not reported	6th	N1a	0	NA	NA	NA	NA	Not Reported	NA	0424ef1b-a7eb-578a-8aa8-56c99741120a	NA	NA	72	-26642	1937	NA	23569f04-f35d-5fec-8f79-3b0296fb665e	Alive	not hispanic or latino	female	white	NA	NA	NA	Radiation Therapy, NOS
TCGA-GM-A3XG	Lobular carcinoma, NOS	not reported	M0	not reported	T3	Stage IIIA	Breast, NOS	No	no	8520/3	C50.9	released	No	not reported	9ea012e5-0666-5f09-83d1-ea718aceb7ec	Breast, NOS	1330	NA	stage iiia	2009	16948	2019-08-08T16:29:50.543582-05:00	NA	not reported	6th	N1a	0	NA	NA	NA	NA	Not Reported	NA	f1f9ac1e-932e-5e5f-a526-0f0565152d0c	NA	NA	46	-16948	1963	NA	51640013-d67c-5cdf-8393-a300283dcdb5	Alive	not hispanic or latino	female	white	NA	NA	NA	Radiation Therapy, NOS
TCGA-GM-A3XL	Infiltrating duct carcinoma, NOS	not reported	M0	not reported	T2	Stage IIA	Breast, NOS	No	no	8500/3	C50.9	released	No	not reported	399f78f1-1725-50a5-892f-ef46aabb4ad0	Breast, NOS	2108	NA	stage iia	2007	18171	2019-08-08T16:29:50.543582-05:00	NA	not reported	6th	N0 (i-)	0	NA	NA	NA	NA	Not Reported	NA	6656a563-6336-5144-8eb2-ff0db82bc605	NA	NA	49	-18171	1958	NA	d4b66764-c707-5809-a9e8-e917e52e9cc1	Alive	not hispanic or latino	female	black or african american	NA	NA	NA	Radiation Therapy, NOS
TCGA-GM-A3XN	Lobular carcinoma, NOS	not reported	M0	not reported	T1c	Stage IIIA	Breast, NOS	No	no	8520/3	C50.9	released	No	not reported	614b0361-750d-59dd-b431-c292e96c5fd1	Breast, NOS	2019	NA	stage iiia	2007	16109	2019-08-08T16:29:50.543582-05:00	NA	not reported	6th	N2a	0	NA	NA	NA	NA	Not Reported	NA	884e2a89-1a7b-5192-b6aa-3aab4722a3a5	NA	NA	44	-16109	1963	NA	edc7a3c6-972c-5e4c-a25e-37e851fd6d8f	Alive	not hispanic or latino	female	white	NA	NA	NA	Radiation Therapy, NOS
TCGA-GM-A4E0	Lobular carcinoma, NOS	not reported	M0	not reported	T3	Stage IIIC	Breast, NOS	No	no	8520/3	C50.9	released	No	not reported	ae92bc1d-0904-5634-b8f1-30a5627cbc05	Breast, NOS	2191	NA	stage iiic	2007	24788	2019-08-08T16:29:50.543582-05:00	NA	not reported	6th	N3a	0	NA	NA	NA	NA	Not Reported	NA	6c78263f-28b8-5da8-83a3-8d03cf826f86	NA	NA	67	-24788	1940	NA	ea909cf8-a3a2-589b-b2c9-2916182d9fab	Alive	not hispanic or latino	female	white	NA	NA	NA	Radiation Therapy, NOS
TCGA-GM-A5PV	Lobular carcinoma, NOS	not reported	M0	not reported	T2	Stage IIB	Breast, NOS	No	no	8520/3	C50.9	released	No	not reported	b66384a0-2d22-5a13-998f-d96f206e9ec5	Breast, NOS	412	NA	stage iib	2011	23215	2019-08-08T16:29:50.543582-05:00	NA	not reported	7th	N1a	0	NA	NA	NA	NA	Not Reported	NA	f321819f-f285-5354-a2b7-3f9f9999d7f4	NA	NA	63	-23215	1948	NA	e4db5e33-7287-5e64-b9c1-39da55603256	Alive	not hispanic or latino	female	white	NA	NA	NA	Radiation Therapy, NOS
TCGA-GM-A5PX	Lobular carcinoma, NOS	not reported	M0	not reported	T2	Stage IIB	Breast, NOS	No	no	8520/3	C50.9	released	No	not reported	8a0aae09-b02d-507f-8b24-68bd6d613130	Breast, NOS	551	NA	stage iib	2011	23753	2019-08-08T16:29:50.543582-05:00	NA	not reported	7th	N1mi	0	NA	NA	NA	NA	Not Reported	NA	bfb38c77-3f9d-5f9b-be34-3e99c3400ec3	NA	NA	65	-23753	1946	NA	56421ecc-826c-56c8-b9c9-a6ee326b5e26	Alive	not hispanic or latino	female	white	NA	NA	NA	Radiation Therapy, NOS
TCGA-HN-A2NL	Lobular carcinoma, NOS	not reported	M0	not reported	T2	Stage IIA	Breast, NOS	No	no	8520/3	C50.9	released	No	not reported	43270f2d-5c26-53b6-b815-bd889d4243ff	Breast, NOS	79	NA	stage iia	NA	20483	2019-08-08T16:29:50.543582-05:00	NA	not reported	6th	N0	0	NA	NA	NA	NA	Not Reported	NA	77c6c810-64e9-5f97-9e7c-5baee1f6906c	NA	NA	56	-20483	NA	NA	b4147818-66b8-5497-98da-5c0351e3a864	Alive	not reported	female	not reported	NA	NA	NA	Radiation Therapy, NOS
TCGA-HN-A2OB	Lobular carcinoma, NOS	not reported	M0	not reported	T2	Stage IIB	Breast, NOS	No	no	8520/3	C50.9	released	No	not reported	d96a293b-98d4-5fe8-85c2-ea272244fe51	Breast, NOS	1883	NA	stage iib	NA	16672	2019-08-08T16:29:50.543582-05:00	NA	not reported	6th	N1	0	NA	NA	NA	NA	Not Reported	NA	4171f7f2-6438-58a2-8195-8c669d18baec	NA	NA	45	-16672	NA	NA	6f7be5f2-d824-52d1-9e86-015cb6ee28ae	Dead	not reported	female	not reported	1900	NA	NA	Radiation Therapy, NOS
TCGA-JL-A3YW	Lobular carcinoma, NOS	not reported	M0	not reported	T2	Stage IIB	Breast, NOS	No	no	8520/3	C50.9	released	No	not reported	4dcd93cc-d255-5a7f-9d0b-b06f8c152adc	Breast, NOS	360	NA	stage iib	2011	NA	2019-08-08T16:29:50.543582-05:00	NA	not reported	7th	N1	0	NA	NA	NA	NA	Not Reported	NA	79c3941d-a919-5fcf-b9b3-464fe734b94e	NA	NA	49	NA	1962	NA	2ffe4afe-5894-522c-b85c-f6da7813bc78	Alive	not hispanic or latino	female	asian	NA	NA	NA	Radiation Therapy, NOS
TCGA-JL-A3YX	Lobular carcinoma, NOS	not reported	M0	not reported	T2	Stage IIA	Breast, NOS	No	no	8520/3	C50.9	released	No	not reported	55222967-09e5-5bdb-94ca-2873b251a0c5	Breast, NOS	352	NA	stage iia	2011	NA	2019-08-08T16:29:50.543582-05:00	NA	not reported	7th	N0	0	NA	NA	NA	NA	Not Reported	NA	b7a770a5-087b-5a19-8291-09979da040f7	NA	NA	46	NA	1965	NA	9fb7cb91-c7cd-5c2a-8ecc-413d1954d422	Alive	not hispanic or latino	female	asian	NA	NA	NA	Radiation Therapy, NOS
TCGA-LD-A66U	Lobular carcinoma, NOS	not reported	MX	not reported	T2	Stage IIB	Breast, NOS	No	no	8520/3	C50.9	released	No	not reported	bd8ba1ce-4f18-5a80-8a8e-e27487ae7661	Breast, NOS	646	NA	stage iib	2012	16101	2019-08-08T16:29:50.543582-05:00	NA	not reported	7th	N1mi	0	NA	NA	NA	NA	Not Reported	NA	7f772647-0a65-5d4e-9746-bac5cb2b9a69	NA	NA	44	-16101	1968	NA	c3f28466-a94c-5308-921e-482f966409f8	Alive	not hispanic or latino	female	white	NA	NA	NA	Radiation Therapy, NOS
TCGA-LD-A74U	Infiltrating lobular mixed with other types of carcinoma	not reported	M0	not reported	T3	Stage IIIC	Breast, NOS	No	yes	8524/3	C50.9	released	Not Reported	not reported	a3e9997c-8c97-506b-8668-c2e1db5564d1	Breast, NOS	402	NA	stage iiic	2013	28981	2019-08-08T16:29:50.543582-05:00	NA	not reported	7th	N3a	0	NA	NA	NA	NA	Not Reported	NA	5b7df3ee-267c-518e-9eae-d14110fb5866	NA	NA	79	-28981	1934	NA	14ca5d0f-35f4-58ae-abf5-ffade4538cd1	Alive	not hispanic or latino	female	white	NA	NA	NA	Radiation Therapy, NOS
TCGA-LD-A7W6	Infiltrating lobular mixed with other types of carcinoma	not reported	M0	not reported	T2	Stage IIB	Upper-inner quadrant of breast	No	no	8524/3	C50.2	released	No	not reported	266d1890-355d-514a-929a-e1fa5c5e1f3e	Upper-inner quadrant of breast	404	NA	stage iib	2013	20077	2019-08-08T16:29:50.543582-05:00	NA	not reported	7th	N1a	0	NA	NA	NA	NA	Not Reported	NA	2c062aa0-8d24-5878-86fb-69f260d609f2	NA	NA	54	-20077	1959	NA	97947dec-653c-5c47-bbcd-dce78a6e9a14	Alive	not hispanic or latino	female	white	NA	NA	NA	Radiation Therapy, NOS
TCGA-LL-A440	Lobular carcinoma, NOS	not reported	MX	not reported	T1c	Stage IA	Breast, NOS	No	yes	8520/3	C50.9	released	Not Reported	not reported	426cbd54-8cd7-5c29-b7f7-7bdfa7a9091d	Breast, NOS	759	NA	stage ia	2012	22497	2019-08-08T16:29:50.543582-05:00	NA	not reported	7th	N0 (i-)	0	NA	NA	NA	NA	Not Reported	NA	abbef123-c781-5180-9013-c950101337e4	NA	NA	61	-22497	1951	NA	f5229922-62e2-51d5-ba4e-9489554c6a49	Alive	not hispanic or latino	female	white	NA	NA	NA	Radiation Therapy, NOS
TCGA-LL-A442	Infiltrating duct carcinoma, NOS	not reported	MX	not reported	T2	Stage IIA	Breast, NOS	No	yes	8500/3	C50.9	released	Not Reported	not reported	a1373964-0936-5a6e-a53f-6b306d41bf43	Breast, NOS	889	NA	stage iia	2012	20495	2019-08-08T16:29:50.543582-05:00	NA	not reported	7th	N0 (i-)	0	NA	NA	NA	NA	Not Reported	NA	7954a748-5a68-5353-84aa-e488044502fd	NA	NA	56	-20495	1956	NA	60c4ec82-5fe2-5820-9042-d992c4b649a5	Alive	not hispanic or latino	female	black or african american	NA	NA	NA	Radiation Therapy, NOS
TCGA-LL-A50Y	Lobular carcinoma, NOS	not reported	MX	not reported	T2	Stage IIA	Breast, NOS	No	yes	8520/3	C50.9	released	Not Reported	not reported	9d519f4a-28e2-5702-8d5d-d3cf2751b88e	Breast, NOS	762	NA	stage iia	2012	30934	2019-08-08T16:29:50.543582-05:00	NA	not reported	7th	N0	0	NA	NA	NA	NA	Not Reported	NA	8833cebc-7327-5b8d-8258-e5e091483606	NA	NA	84	-30934	1928	NA	75eea218-b070-5b23-9a0c-73a49169acb5	Alive	not hispanic or latino	female	white	NA	NA	NA	Radiation Therapy, NOS
TCGA-LL-A5YL	Lobular carcinoma, NOS	not reported	MX	not reported	T2	Stage IIB	Breast, NOS	No	no	8520/3	C50.9	released	No	not reported	df78d5c8-6735-5642-9be5-dac207076fc4	Breast, NOS	519	NA	stage iib	2012	23395	2019-08-08T16:29:50.543582-05:00	NA	not reported	7th	N1a	0	NA	NA	NA	NA	Not Reported	NA	4e6bcda5-dec0-56c7-85bb-5751621c561d	NA	NA	64	-23395	1948	NA	e09dd8be-9ec6-5f2d-8156-365d1f5880ee	Alive	not hispanic or latino	female	white	NA	NA	NA	Radiation Therapy, NOS
TCGA-LL-A5YN	Infiltrating duct carcinoma, NOS	not reported	M0	not reported	T2	Stage IIA	Breast, NOS	No	no	8500/3	C50.9	released	No	not reported	e5eddb7a-6285-5d07-b412-9dc9b404eee4	Breast, NOS	447	NA	stage iia	2013	16884	2019-08-08T16:29:50.543582-05:00	NA	not reported	7th	N0 (i-)	0	NA	NA	NA	NA	Not Reported	NA	4a7dc27c-b3e6-5c09-a62c-1afce1ff1a7c	NA	NA	46	-16884	1967	NA	e705801f-2f70-5eca-bd67-019091137393	Alive	not hispanic or latino	female	black or african american	NA	NA	NA	Radiation Therapy, NOS
TCGA-LL-A5YO	Infiltrating duct carcinoma, NOS	not reported	MX	not reported	T1b	Stage IA	Breast, NOS	No	no	8500/3	C50.9	released	No	not reported	7c182043-4fee-529f-9ef0-0ae620fd59c7	Breast, NOS	440	NA	stage ia	2013	18354	2019-08-08T16:29:50.543582-05:00	NA	not reported	7th	N0	0	NA	NA	NA	NA	Not Reported	NA	28f234d3-01c5-5b76-8664-7be16e34f4eb	NA	NA	50	-18354	1963	NA	458b8133-b08c-5bdc-8e42-a6ef7c54bc00	Alive	not hispanic or latino	female	black or african american	NA	NA	NA	Radiation Therapy, NOS
TCGA-LL-A5YP	Infiltrating duct carcinoma, NOS	not reported	M0	not reported	T2	Stage IIB	Breast, NOS	No	yes	8500/3	C50.9	released	Not Reported	not reported	2a435551-01f7-57b7-bcce-d707e5a12b40	Breast, NOS	450	NA	stage iib	2013	18041	2019-08-08T16:29:50.543582-05:00	NA	not reported	7th	N1a	0	NA	NA	NA	NA	Not Reported	NA	2e7ac64d-2412-5449-aad3-0f1db7ee6153	NA	NA	49	-18041	1964	NA	2ce3407e-3484-5691-8ccb-38f9b51e00a1	Alive	not hispanic or latino	female	black or african american	NA	NA	NA	Radiation Therapy, NOS
TCGA-LL-A6FP	Lobular carcinoma, NOS	not reported	MX	not reported	T2	Stage IIA	Breast, NOS	Yes	no	8520/3	C50.9	released	No	not reported	0fe82c74-4917-5b90-a43a-5e549665f99a	Breast, NOS	0	NA	stage iia	2012	32872	2019-08-08T16:29:50.543582-05:00	NA	not reported	7th	NX	0	NA	NA	NA	NA	Not Reported	NA	d73e4756-359e-5605-8c10-7f0f6e6b9e33	NA	NA	90	-32872	1922	NA	94d0b050-180b-54c5-827b-af52e1b7ad31	Alive	not hispanic or latino	female	white	NA	NA	NA	Radiation Therapy, NOS
TCGA-LL-A6FQ	Infiltrating duct carcinoma, NOS	not reported	MX	not reported	T2	Stage IIIA	Breast, NOS	No	no	8500/3	C50.9	released	No	not reported	1566ac99-feca-5f29-be17-45e941bc0d57	Breast, NOS	80	NA	stage iiia	2013	28375	2019-08-08T16:29:50.543582-05:00	NA	not reported	7th	N2a	0	NA	NA	NA	NA	Not Reported	NA	861d4804-adf6-5e9f-9de3-02ae08344914	NA	NA	77	-28375	1936	NA	1ab65998-88f4-5a26-ab31-93d152fe27ab	Alive	not hispanic or latino	female	black or african american	NA	NA	NA	Radiation Therapy, NOS
TCGA-LL-A6FR	Infiltrating duct carcinoma, NOS	not reported	MX	not reported	T2	Stage IIA	Breast, NOS	No	no	8500/3	C50.9	released	No	not reported	ff3c5db8-2d15-5a30-a49a-5ed5d2fecfe8	Breast, NOS	489	NA	stage iia	2013	18520	2019-08-08T16:29:50.543582-05:00	NA	not reported	7th	N0 (i-)	0	NA	NA	NA	NA	Not Reported	NA	f4de47e6-087b-50bd-b7f7-9d7d5d7b4362	NA	NA	50	-18520	1963	NA	cd5c7403-f690-57f3-a208-12fb19bde028	Alive	not hispanic or latino	female	black or african american	NA	NA	NA	Radiation Therapy, NOS
TCGA-LL-A73Y	Infiltrating duct carcinoma, NOS	not reported	MX	not reported	T1c	Stage IA	Breast, NOS	No	no	8500/3	C50.9	released	No	not reported	8de52698-2719-56fc-b24a-04f2b2e576f3	Breast, NOS	477	NA	stage ia	2013	24647	2019-08-08T16:29:50.543582-05:00	NA	not reported	7th	N0	0	NA	NA	NA	NA	Not Reported	NA	27b7f389-bc03-523f-8969-859467858195	NA	NA	67	-24647	1946	NA	4a6f97c8-1741-5694-a88e-a8e8ef7d8fac	Alive	not hispanic or latino	female	black or african american	NA	NA	NA	Radiation Therapy, NOS
TCGA-LL-A740	Infiltrating duct carcinoma, NOS	not reported	MX	not reported	T1c	Stage IA	Breast, NOS	No	no	8500/3	C50.9	released	No	not reported	571cf0d0-427a-5c89-a165-600b73bffd74	Breast, NOS	441	NA	stage ia	2013	22416	2019-08-08T16:29:50.543582-05:00	NA	not reported	7th	N0 (i-)	0	NA	NA	NA	NA	Not Reported	NA	3043c6d7-de7f-5177-bbad-d925f0c758a6	NA	NA	61	-22416	1952	NA	84d6d21a-68b1-505e-a745-b06b91dc35dd	Alive	not hispanic or latino	female	black or african american	NA	NA	NA	Radiation Therapy, NOS
TCGA-LL-A7SZ	Infiltrating duct carcinoma, NOS	not reported	MX	not reported	T2	Stage IIB	Breast, NOS	No	no	8500/3	C50.9	released	No	not reported	2b00f4cd-600e-5244-b5a8-6b50a0a661b0	Breast, NOS	594	NA	stage iib	2013	18161	2019-08-08T16:29:50.543582-05:00	NA	not reported	7th	N1a	0	NA	NA	NA	NA	Not Reported	NA	7bcf4ee7-e7c6-5dbf-9884-9bfb3a4b8b42	NA	NA	49	-18161	1964	NA	46d3bffc-7efb-5886-a09b-0dbe2222abbe	Alive	not hispanic or latino	female	black or african american	NA	NA	NA	Radiation Therapy, NOS
TCGA-LL-A7T0	Infiltrating duct carcinoma, NOS	not reported	M0	not reported	T2	Stage IIB	Breast, NOS	No	no	8500/3	C50.9	released	No	not reported	87c779e4-f86f-573d-b584-97740dbc24fc	Breast, NOS	376	NA	stage iib	2013	25867	2019-08-08T16:29:50.543582-05:00	NA	not reported	7th	N1a	0	NA	NA	NA	NA	Not Reported	NA	e6eadcff-e8ca-5dda-a5b2-6d3f8e9db006	NA	NA	70	-25867	1943	NA	c2920d5b-2864-5fae-a53c-084eeb3d6983	Alive	not hispanic or latino	female	black or african american	NA	NA	NA	Radiation Therapy, NOS
TCGA-LL-A8F5	Infiltrating duct carcinoma, NOS	not reported	MX	not reported	T2	Stage IIA	Breast, NOS	No	no	8500/3	C50.9	released	No	not reported	9b49dd84-a19d-5645-a435-d42120ad9885	Breast, NOS	596	NA	stage iia	2013	22544	2019-08-08T16:29:50.543582-05:00	NA	not reported	7th	N0 (i-)	0	NA	NA	NA	NA	Not Reported	NA	b68b33f5-f645-54a2-9784-784dad261d6b	NA	NA	61	-22544	1952	NA	9eac70fd-67e8-5ecb-b3ce-dc8ee27ebe54	Alive	not hispanic or latino	female	black or african american	NA	NA	NA	Radiation Therapy, NOS
TCGA-LL-A9Q3	Lobular carcinoma, NOS	not reported	MX	not reported	T3	Stage IIIC	Breast, NOS	No	no	8520/3	C50.9	released	No	not reported	cd3c40fb-9c25-581e-b9db-eb5815906ca4	Breast, NOS	532	NA	stage iiic	2013	25477	2019-08-08T16:29:50.543582-05:00	NA	not reported	7th	N3a	0	NA	NA	NA	NA	Not Reported	NA	03b2ca44-b563-58f4-a7d0-fa997d001f6e	NA	NA	69	-25477	1944	NA	9ea1b17c-8299-595f-b2f2-2ce6fb4d1f81	Alive	not hispanic or latino	female	white	NA	NA	NA	Radiation Therapy, NOS
TCGA-LQ-A4E4	Lobular carcinoma, NOS	not reported	MX	not reported	T3	Stage IIIA	Breast, NOS	No	no	8520/3	C50.9	released	No	not reported	3a1be4b8-30cb-5687-8ead-b1cd8d248890	Breast, NOS	849	NA	stage iiia	2011	26883	2019-08-08T16:29:50.543582-05:00	NA	not reported	7th	N1a	0	NA	NA	NA	NA	Not Reported	NA	f0cf78a2-b075-5423-b519-6aeea5810abc	NA	NA	73	-26883	1938	NA	0b59cbd9-ee1e-5160-aa26-af5edac28814	Alive	not hispanic or latino	female	white	NA	NA	NA	Radiation Therapy, NOS
TCGA-MS-A51U	Lobular carcinoma, NOS	not reported	M0	not reported	T2	Stage IIB	Breast, NOS	No	no	8520/3	C50.9	released	No	not reported	73aa4f1c-a8ae-588b-ad5a-5f68d635b52f	Breast, NOS	681	NA	stage iib	2012	16213	2019-08-08T16:29:50.543582-05:00	NA	not reported	7th	N1	0	NA	NA	NA	NA	Not Reported	NA	66496c1b-26c3-5d78-b6b2-0815f14e3ab7	NA	NA	44	-16213	1968	NA	33631a38-c5ba-5e70-9a29-738792934b53	Alive	not hispanic or latino	female	white	NA	NA	NA	Radiation Therapy, NOS
TCGA-OK-A5Q2	Lobular carcinoma, NOS	not reported	MX	not reported	T2	Stage II	Breast, NOS	No	no	8520/3	C50.9	released	No	not reported	e3a0d357-e424-5399-87d4-d70e45aba98b	Breast, NOS	64	NA	stage ii	2012	21555	2019-08-08T16:29:50.543582-05:00	NA	not reported	7th	N1a	0	NA	NA	NA	NA	Not Reported	NA	040a180b-6cf3-51d9-b24a-8dc5a0445c9f	NA	NA	59	-21555	1953	NA	9df68e76-a322-5e96-bf83-d1672b4c9f06	Alive	not reported	female	not reported	NA	NA	NA	Radiation Therapy, NOS
TCGA-OL-A5D7	Infiltrating duct carcinoma, NOS	not reported	MX	not reported	T2	Stage IIA	Breast, NOS	No	no	8500/3	C50.9	released	No	not reported	23d88b17-21eb-5efc-a76c-8d79a1c7334f	Breast, NOS	1780	NA	stage iia	2009	25643	2019-08-08T16:29:50.543582-05:00	NA	not reported	6th	N0	0	NA	NA	NA	NA	Not Reported	NA	df91a039-dde6-5173-a458-aeee7c577118	NA	NA	70	-25643	1939	NA	606f880c-41ab-53f9-8a6f-bc660c4f03c7	Alive	not hispanic or latino	female	black or african american	NA	NA	NA	Radiation Therapy, NOS
TCGA-OL-A5D8	Infiltrating duct carcinoma, NOS	not reported	MX	not reported	T3	Stage IIB	Breast, NOS	No	no	8500/3	C50.9	released	No	not reported	89a6fc26-d897-5299-90df-d79b17eec89e	Breast, NOS	973	NA	stage iib	2009	14853	2019-08-08T16:29:50.543582-05:00	NA	not reported	6th	N0	0	NA	NA	NA	NA	Not Reported	NA	8bb4f981-55a3-5e27-a286-8482d4f8bc15	NA	NA	40	-14853	1969	NA	f74ed640-3ffd-5fbb-9687-c678ecaea0ea	Alive	not hispanic or latino	female	black or african american	NA	NA	NA	Radiation Therapy, NOS
TCGA-OL-A5DA	Lobular carcinoma, NOS	not reported	MX	not reported	T2	Stage IIA	Breast, NOS	No	no	8520/3	C50.9	released	No	not reported	f263c625-fbbd-5801-89eb-d948e913cfa9	Breast, NOS	1783	NA	stage iia	2009	22411	2019-08-08T16:30:14.878156-05:00	NA	not reported	6th	N0	0	NA	NA	NA	NA	Not Reported	NA	75e56bd3-15bc-5dc2-af21-7d99f021918a	NA	NA	61	-22411	1948	NA	8985ede8-65d4-59ac-9936-ea4baed3bb73	Alive	not hispanic or latino	female	white	NA	NA	NA	Radiation Therapy, NOS
TCGA-OL-A5RU	Infiltrating duct carcinoma, NOS	not reported	MX	not reported	T1c	Stage IIA	Breast, NOS	No	no	8500/3	C50.9	released	No	not reported	01236db8-8096-5497-9fc5-0b1126a0da2d	Breast, NOS	1219	NA	stage iia	2010	23108	2019-08-08T16:30:14.878156-05:00	NA	not reported	7th	N1	0	NA	NA	NA	NA	Not Reported	NA	7413b54f-297d-53fe-abd9-804a06258269	NA	NA	63	-23108	1947	NA	8a996218-4fc9-5c27-afa1-d59712c6efed	Alive	not reported	female	black or african american	NA	NA	NA	Radiation Therapy, NOS
TCGA-OL-A5RV	Infiltrating duct carcinoma, NOS	not reported	MX	not reported	T2	Stage IIIC	Breast, NOS	No	no	8500/3	C50.9	released	No	not reported	a61c8819-c5ee-5fe0-8b6b-13f028764f20	Breast, NOS	1062	NA	stage iiic	2011	15820	2019-08-08T16:30:14.878156-05:00	NA	not reported	7th	N3	0	NA	NA	NA	NA	Not Reported	NA	5829077e-674b-5593-96bd-2a16713a7b0a	NA	NA	43	-15820	1968	NA	aae0e245-9bf2-5270-a119-d15739e575f5	Alive	not reported	female	black or african american	NA	NA	NA	Radiation Therapy, NOS
TCGA-OL-A5RW	Infiltrating duct carcinoma, NOS	not reported	MX	not reported	T1c	Stage IIA	Breast, NOS	No	no	8500/3	C50.9	released	No	not reported	3af6d341-f03e-51bf-97df-34dcf9d9d433	Breast, NOS	1106	NA	stage iia	2010	14638	2019-08-08T16:30:14.878156-05:00	NA	not reported	7th	N1	0	NA	NA	NA	NA	Not Reported	NA	24b6a239-597f-559e-96be-5775f91f8178	NA	NA	40	-14638	1970	NA	43aa2d53-2405-51ac-9a8e-0bb7217fc5d5	Alive	not reported	female	black or african american	NA	NA	NA	Radiation Therapy, NOS
TCGA-OL-A5RX	Infiltrating duct carcinoma, NOS	not reported	MX	not reported	T1c	Stage IA	Breast, NOS	No	no	8500/3	C50.9	released	No	not reported	95bb9ddf-c9ea-523c-b485-bdb02014245c	Breast, NOS	878	NA	stage ia	2011	18942	2019-08-08T16:30:14.878156-05:00	NA	not reported	7th	N0	0	NA	NA	NA	NA	Not Reported	NA	fd81cd3e-95a2-5b32-90f0-3824e1c28d4f	NA	NA	51	-18942	1960	NA	418bf60e-02e9-539e-8013-5f03c9a17b0d	Alive	not reported	female	black or african american	NA	NA	NA	Radiation Therapy, NOS
TCGA-OL-A5RZ	Infiltrating duct carcinoma, NOS	not reported	MX	not reported	T1b	Stage IA	Breast, NOS	No	no	8500/3	C50.9	released	No	not reported	70a00bdb-1bc1-525d-96f2-59cde34df463	Breast, NOS	679	NA	stage ia	2012	21038	2019-08-08T16:30:14.878156-05:00	NA	not reported	7th	N0	0	NA	NA	NA	NA	Not Reported	NA	b66ed97c-53b3-5ef3-8b9a-e4e891a41a68	NA	NA	57	-21038	1955	NA	272f84f3-4f5e-5a14-83a8-0a456bc48385	Alive	not reported	female	black or african american	NA	NA	NA	Radiation Therapy, NOS
TCGA-OL-A5S0	Infiltrating duct carcinoma, NOS	not reported	MX	not reported	T2	Stage IIB	Breast, NOS	No	no	8500/3	C50.9	released	No	not reported	acf34061-6c2c-541c-885f-286f5b9de655	Breast, NOS	620	NA	stage iib	2012	24139	2019-08-08T16:30:14.878156-05:00	NA	not reported	7th	N1a	0	NA	NA	NA	NA	Not Reported	NA	b7236004-e01f-5598-bd47-321167be88cc	NA	NA	66	-24139	1946	NA	109c8738-7c4c-56c0-9744-3f1b5a40f0fe	Alive	not reported	female	black or african american	NA	NA	NA	Radiation Therapy, NOS
TCGA-OL-A66H	Mucinous adenocarcinoma	not reported	MX	not reported	T1c	Stage IB	Breast, NOS	No	no	8480/3	C50.9	released	No	not reported	e37544e4-5acd-5ea6-8195-5f5f38128c01	Breast, NOS	812	NA	stage ib	2012	27280	2019-08-08T16:30:14.878156-05:00	NA	not reported	7th	N1mi	0	NA	NA	NA	NA	Not Reported	NA	2d7d2d3a-853c-5bc0-89e1-cb008b32ae28	NA	NA	74	-27280	NA	NA	5bd220a9-d8c5-5e01-9543-aa79f0c55d40	Alive	not hispanic or latino	female	black or african american	NA	NA	NA	Radiation Therapy, NOS
TCGA-OL-A66I	Infiltrating duct carcinoma, NOS	not reported	MX	not reported	T1c	Stage IIA	Breast, NOS	No	no	8500/3	C50.9	released	No	not reported	53a628ac-da4e-574c-8593-13b41f294057	Breast, NOS	714	NA	stage iia	2008	13458	2019-08-08T16:30:14.878156-05:00	NA	not reported	6th	N1mi	0	NA	NA	NA	NA	Not Reported	NA	f20777ca-aace-5140-8d47-1a22cc2010d9	NA	NA	36	-13458	1972	NA	74956f3c-a7ea-5880-8f41-1a3f6609565b	Alive	not hispanic or latino	female	black or african american	NA	NA	NA	Radiation Therapy, NOS
TCGA-OL-A66J	Lobular carcinoma, NOS	not reported	MX	not reported	T1c	Stage I	Breast, NOS	No	no	8520/3	C50.9	released	No	not reported	05fac853-1e8d-59b5-a166-14d79a332351	Breast, NOS	1996	NA	stage i	2008	29345	2019-08-08T16:30:14.878156-05:00	NA	not reported	6th	N0	0	NA	NA	NA	NA	Not Reported	NA	06dbfbf6-dcce-5e59-b89a-f4407f482c29	NA	NA	80	-29345	1928	NA	bfdc6d11-b08c-525b-9b56-f4709fe27b79	Alive	not hispanic or latino	female	white	NA	NA	NA	Radiation Therapy, NOS
TCGA-OL-A66K	Lobular carcinoma, NOS	not reported	MX	not reported	T2	Stage IIA	Breast, NOS	No	no	8520/3	C50.9	released	No	not reported	cb5128ff-1b51-54df-82c9-5ba11c612705	Breast, NOS	1021	NA	stage iia	2010	26299	2019-08-08T16:30:14.878156-05:00	NA	not reported	7th	N0	0	NA	NA	NA	NA	Not Reported	NA	1f38bbfa-8b68-59fe-92b8-ba553919811b	NA	NA	72	-26299	1938	NA	3278e9ce-92b0-5e92-b490-6fb07475aa92	Dead	not hispanic or latino	female	white	1275	NA	NA	Radiation Therapy, NOS
TCGA-OL-A66L	Infiltrating duct carcinoma, NOS	not reported	MX	not reported	T1c	Stage IA	Breast, NOS	No	no	8500/3	C50.9	released	No	not reported	a2fdbed8-d8a7-553c-bf96-70eebb82400d	Breast, NOS	1301	NA	stage ia	2010	26186	2019-08-08T16:30:14.878156-05:00	NA	not reported	7th	N0	0	NA	NA	NA	NA	Not Reported	NA	0c326109-6909-5eef-835f-3e90a21197be	NA	NA	71	-26186	1939	NA	e144634e-6db7-5ee4-ba93-d51cfc5d909d	Alive	not hispanic or latino	female	black or african american	NA	NA	NA	Radiation Therapy, NOS
TCGA-OL-A66N	Lobular carcinoma, NOS	not reported	MX	not reported	T3	Stage IIIC	Breast, NOS	No	no	8520/3	C50.9	released	No	not reported	d69fc475-558c-5cc5-9539-e0f63fc6c61d	Breast, NOS	792	NA	stage iiic	2011	21608	2019-08-08T16:30:14.878156-05:00	NA	not reported	7th	N3	0	NA	NA	NA	NA	Not Reported	NA	000f402b-b01e-5db0-83b3-36778b237dbc	NA	NA	59	-21608	1952	NA	72e895b7-cad4-598e-8c64-5fe47bc41717	Alive	not hispanic or latino	female	white	NA	NA	NA	Radiation Therapy, NOS
TCGA-OL-A66O	Infiltrating duct carcinoma, NOS	not reported	MX	not reported	T2	Stage IIB	Breast, NOS	No	no	8500/3	C50.9	released	No	not reported	514402a1-df89-512d-a22e-70bb5dbbfe24	Breast, NOS	528	NA	stage iib	2012	14272	2019-08-08T16:30:14.878156-05:00	NA	not reported	7th	N1a	0	NA	NA	NA	NA	Not Reported	NA	da873ab9-9744-5984-b357-6783737cf3c4	NA	NA	39	-14272	1973	NA	6f476782-2bf5-571b-b51a-8f17506ae940	Alive	not hispanic or latino	female	black or african american	NA	NA	NA	Radiation Therapy, NOS
TCGA-OL-A66P	Infiltrating duct carcinoma, NOS	not reported	MX	not reported	T2	Stage IIA	Breast, NOS	No	no	8500/3	C50.9	released	No	not reported	3b5c76ee-a76b-579f-9e78-2951086b12dd	Breast, NOS	428	NA	stage iia	2013	27489	2019-08-08T16:30:14.878156-05:00	NA	not reported	7th	N0	0	NA	NA	NA	NA	Not Reported	NA	59dcdefd-33a3-5fe3-a3cd-14b25be39895	NA	NA	75	-27489	1938	NA	cc387543-6602-534a-a8b6-91429bc6c60f	Alive	not hispanic or latino	female	black or african american	NA	NA	NA	Radiation Therapy, NOS
TCGA-OL-A6VO	Infiltrating duct carcinoma, NOS	not reported	MX	not reported	T1c	Stage IA	Breast, NOS	No	no	8500/3	C50.9	released	No	not reported	8768c643-b3d3-5ef1-aaf5-540226e23efa	Breast, NOS	858	NA	stage ia	2012	15780	2019-08-08T16:30:14.878156-05:00	NA	not reported	7th	N0	0	NA	NA	NA	NA	Not Reported	NA	36f6763c-c7f4-56a0-aa18-3f07a214d86b	NA	NA	43	-15780	1969	NA	23f711ce-b73e-52c5-b2b2-2b4bcb213241	Alive	not hispanic or latino	female	black or african american	NA	NA	NA	Radiation Therapy, NOS
TCGA-OL-A6VQ	Lobular carcinoma, NOS	not reported	MX	not reported	T2	Stage IIA	Breast, NOS	No	no	8520/3	C50.9	released	No	not reported	8234e838-1bfd-5828-923e-47efc16de711	Breast, NOS	600	NA	stage iia	2012	18151	2019-08-08T16:30:14.878156-05:00	NA	not reported	7th	N0	0	NA	NA	NA	NA	Not Reported	NA	1e9e6e55-24b3-5830-ae8a-6f6c417a5c0c	NA	NA	49	-18151	1963	NA	57b57739-51f8-51bc-828a-6ae181407fc2	Alive	not hispanic or latino	female	white	NA	NA	NA	Radiation Therapy, NOS
TCGA-OL-A6VR	Infiltrating duct carcinoma, NOS	not reported	MX	not reported	T1b	Stage IA	Breast, NOS	No	no	8500/3	C50.9	released	No	not reported	9180b33b-14cb-5af2-9fd4-2ea54852b796	Breast, NOS	1220	NA	stage ia	2011	17702	2019-08-08T16:30:14.878156-05:00	NA	not reported	7th	N0	0	NA	NA	NA	NA	Not Reported	NA	ffb8cec1-56a1-597a-8da9-ae1998aaae77	NA	NA	48	-17702	1963	NA	1f8e9c83-c37d-5f36-a401-09b5f4fcbe61	Alive	not hispanic or latino	female	black or african american	NA	NA	NA	Radiation Therapy, NOS
TCGA-PE-A5DD	Lobular carcinoma, NOS	not reported	M0	not reported	T2	Stage IIA	Breast, NOS	No	no	8520/3	C50.9	released	No	not reported	5f049423-18ea-5c26-a808-eb4b078c06c0	Breast, NOS	1953	NA	stage iia	2006	23686	2019-08-08T16:30:14.878156-05:00	NA	not reported	6th	N0	0	NA	NA	NA	NA	Not Reported	NA	d8bba0c5-8673-5abf-9676-94b1bd1a022a	NA	NA	64	-23686	1942	NA	e23cb027-bf61-5674-b7b6-5896b8a58a27	Alive	not hispanic or latino	female	asian	NA	NA	NA	Radiation Therapy, NOS
TCGA-PE-A5DE	Lobular carcinoma, NOS	not reported	M0	not reported	T2	Stage IIA	Breast, NOS	No	no	8520/3	C50.9	released	No	not reported	fedd1c85-fbec-5ad7-9935-9b1a75dd5973	Breast, NOS	2645	NA	stage iia	2007	15216	2019-08-08T16:30:14.878156-05:00	NA	not reported	6th	N0	0	NA	NA	NA	NA	Not Reported	NA	169b97f7-8210-5454-8486-b8e25fbedb21	NA	NA	41	-15216	1966	NA	4dce3ee6-c7d2-55d3-bf50-d1989018973f	Alive	not reported	female	white	NA	NA	NA	Radiation Therapy, NOS
TCGA-PL-A8LV	Medullary carcinoma, NOS	not reported	M0	not reported	T4	Stage IIIB	Breast, NOS	No	no	8510/3	C50.9	released	No	not reported	c3d9930b-2194-5a70-b189-8a34552daa01	Breast, NOS	-7	NA	stage iiib	2013	19746	2019-08-08T16:30:14.878156-05:00	NA	not reported	7th	N0	0	NA	NA	NA	NA	Not Reported	NA	2795c911-784d-5bda-82b5-e6962762eb73	NA	NA	54	-19746	1959	NA	53fb5a5f-60d3-55d7-9777-3ed3ef240243	Alive	not hispanic or latino	female	black or african american	NA	NA	NA	Radiation Therapy, NOS
TCGA-PL-A8LX	Infiltrating duct carcinoma, NOS	not reported	M1	not reported	T4	Stage IV	Breast, NOS	No	no	8500/3	C50.9	released	No	not reported	1ab06c52-3801-50fc-8596-28374b4db4b5	Breast, NOS	5	NA	stage iv	2013	12840	2019-08-08T16:30:14.878156-05:00	NA	not reported	7th	N1a	0	NA	NA	NA	NA	Not Reported	NA	716dfe57-a12d-517b-b1d8-8b6bedf09f9e	NA	NA	35	-12840	1978	NA	562fee57-d81f-52ce-8b4e-22792b17435f	Alive	not hispanic or latino	female	black or african american	NA	NA	NA	Radiation Therapy, NOS
TCGA-PL-A8LZ	Infiltrating duct carcinoma, NOS	not reported	M0	not reported	T4b	Stage IIIB	Breast, NOS	No	no	8500/3	C50.9	released	No	not reported	121914eb-647d-5fb1-9395-5abef61fd057	Breast, NOS	302	NA	stage iiib	2013	10869	2019-08-08T16:30:14.878156-05:00	NA	not reported	7th	N2	0	NA	NA	NA	NA	Not Reported	NA	aa3f40c7-87e8-583d-bfc2-d174a827798d	NA	NA	29	-10869	1984	NA	073918c0-e903-53d0-93d4-8fbb96c767e4	Alive	not hispanic or latino	female	black or african american	NA	NA	NA	Radiation Therapy, NOS
TCGA-S3-A6ZF	Infiltrating duct carcinoma, NOS	not reported	M0	not reported	T2	Stage IIA	Breast, NOS	No	no	8500/3	C50.9	released	No	not reported	a6afe9ef-4c1b-5860-a4a7-902c34f80f5c	Breast, NOS	572	NA	stage iia	2013	23650	2019-08-08T16:30:14.878156-05:00	NA	not reported	7th	N0	0	NA	NA	NA	NA	Not Reported	NA	90f35b5c-f95e-5db8-a7cf-4e3db9a49985	NA	NA	64	-23650	1949	NA	a6faaeb6-bfd9-555a-8aa4-19e82e5869e1	Alive	not hispanic or latino	female	black or african american	NA	NA	NA	Radiation Therapy, NOS
TCGA-S3-A6ZG	Lobular carcinoma, NOS	not reported	M0	not reported	T2	Stage IIB	Breast, NOS	No	no	8520/3	C50.9	released	No	not reported	c1590c2d-aea3-5ea7-8404-4f58e1b8b027	Breast, NOS	562	NA	stage iib	2013	26141	2019-08-08T16:30:14.878156-05:00	NA	not reported	7th	N1	0	NA	NA	NA	NA	Not Reported	NA	fa1d8bdb-d653-582b-b048-b97b1232b85e	NA	NA	71	-26141	1942	NA	6b072bca-5214-54ac-8399-b5d76c30eedc	Alive	not hispanic or latino	female	black or african american	NA	NA	NA	Radiation Therapy, NOS
TCGA-S3-AA0Z	Infiltrating duct carcinoma, NOS	not reported	M0	not reported	T2	Stage IIB	Breast, NOS	No	no	8500/3	C50.9	released	No	not reported	ce69d075-6e0a-52f2-b2ab-5bd270fcaa10	Breast, NOS	629	NA	stage iib	2013	23314	2019-08-08T16:30:14.878156-05:00	NA	not reported	7th	N1a	0	NA	NA	NA	NA	Not Reported	NA	0b2cf07e-ba0b-5d51-8b5e-a086d917b0cb	NA	NA	63	-23314	1950	NA	e4a26ceb-50b1-5d85-95df-bc4f48080991	Alive	not hispanic or latino	female	black or african american	NA	NA	NA	Radiation Therapy, NOS
TCGA-S3-AA10	Infiltrating duct carcinoma, NOS	not reported	M0	not reported	T2	Stage IIA	Breast, NOS	No	no	8500/3	C50.9	released	No	not reported	a6f062ef-225e-5047-aae1-55e57a8c6ba6	Breast, NOS	586	NA	stage iia	2013	24075	2019-08-08T16:30:14.878156-05:00	NA	not reported	7th	N0	0	NA	NA	NA	NA	Not Reported	NA	c790121c-2fda-541f-b02a-03fb74caa690	NA	NA	65	-24075	1948	NA	524978c2-e87f-5f71-910f-6994c9860fca	Alive	not hispanic or latino	female	black or african american	NA	NA	NA	Radiation Therapy, NOS
TCGA-S3-AA11	Infiltrating duct carcinoma, NOS	not reported	M0	not reported	T2	Stage IIA	Breast, NOS	No	no	8500/3	C50.9	released	No	not reported	35342dde-0fb3-585a-8733-d4b9c90db7ba	Breast, NOS	421	NA	stage iia	2013	24813	2019-08-08T16:30:14.878156-05:00	NA	not reported	7th	N0	0	NA	NA	NA	NA	Not Reported	NA	5264bd44-b493-5ef2-ba48-ac10daf4eba1	NA	NA	67	-24813	1946	NA	41e472f5-2398-5d1b-b687-2eef74cbb5ad	Alive	not hispanic or latino	female	black or african american	NA	NA	NA	Radiation Therapy, NOS
TCGA-S3-AA14	Infiltrating duct carcinoma, NOS	not reported	cM0 (i+)	not reported	T1	Stage I	Breast, NOS	No	no	8500/3	C50.9	released	No	not reported	731259f0-e9b7-5627-b08e-71cb5542f3b8	Breast, NOS	529	NA	stage i	2013	17352	2019-08-08T16:30:14.878156-05:00	NA	not reported	7th	N0 (i+)	0	NA	NA	NA	NA	Not Reported	NA	520baca5-1788-5e6b-a53a-d6e824b2f6dd	NA	NA	47	-17352	1966	NA	c13871f8-8927-5a8a-ab99-5ec416ebd5db	Alive	not hispanic or latino	female	black or african american	NA	NA	NA	Radiation Therapy, NOS
TCGA-S3-AA15	Infiltrating duct carcinoma, NOS	not reported	cM0 (i+)	not reported	T2	Stage IIB	Breast, NOS	No	no	8500/3	C50.9	released	No	not reported	e8db3d00-0b8f-5102-9ed1-692335d28bdc	Breast, NOS	525	NA	stage iib	2013	18659	2019-08-08T16:30:14.878156-05:00	NA	not reported	7th	N1a	0	NA	NA	NA	NA	Not Reported	NA	8dad3597-15be-561b-9ee8-dc4f016e3eba	NA	NA	51	-18659	1962	NA	19992b51-1e67-56f3-a3e6-f8ddf72a37ef	Alive	not hispanic or latino	female	black or african american	NA	NA	NA	Radiation Therapy, NOS
TCGA-S3-AA17	Infiltrating duct carcinoma, NOS	not reported	cM0 (i+)	not reported	T2	Stage IIB	Breast, NOS	No	yes	8500/3	C50.9	released	Not Reported	not reported	aa435440-8297-592f-9027-150df7ceab8a	Breast, NOS	424	NA	stage iib	2013	23642	2019-08-08T16:30:14.878156-05:00	NA	not reported	7th	N1mi	0	NA	NA	NA	NA	Not Reported	NA	abc89c1d-3cb8-51a9-8306-66951ba8dfb4	NA	NA	64	-23642	1949	NA	eda155ac-f456-5e54-b643-892c8554270c	Alive	not hispanic or latino	female	black or african american	NA	NA	NA	Radiation Therapy, NOS
TCGA-UL-AAZ6	Infiltrating duct carcinoma, NOS	not reported	MX	not reported	T2	Stage IIA	Breast, NOS	No	no	8500/3	C50.9	released	No	not reported	e5966571-e8de-5302-9782-f581370bd95e	Breast, NOS	518	NA	stage iia	2013	26999	2019-08-08T16:30:14.878156-05:00	NA	not reported	7th	N0	0	NA	NA	NA	NA	Not Reported	NA	4bfe47f1-b215-540d-b116-6b283f0d4e79	NA	NA	73	-26999	1940	NA	16845b62-3736-54f9-9115-86af1bf7ca3f	Alive	not hispanic or latino	female	black or african american	NA	NA	NA	Radiation Therapy, NOS
TCGA-V7-A7HQ	Infiltrating duct carcinoma, NOS	not reported	M0	not reported	T1c	Stage IIIA	Breast, NOS	No	no	8500/3	C50.9	released	No	not reported	1e908dda-c642-5759-aafb-577419bbbecb	Breast, NOS	2033	NA	stage iiia	2009	27684	2019-08-08T16:30:14.878156-05:00	NA	not reported	6th	N2a	0	NA	NA	NA	NA	Not Reported	NA	38ea3492-d404-5921-8616-8db392fc5cea	NA	NA	75	-27684	1934	NA	fb3a62b6-8f14-5cd6-84ef-4f9c4c6349b4	Alive	not hispanic or latino	female	black or african american	NA	NA	NA	Radiation Therapy, NOS
TCGA-W8-A86G	Lobular carcinoma, NOS	not reported	MX	not reported	T2a	Stage IIA	Breast, NOS	No	yes	8520/3	C50.9	released	Not Reported	not reported	7b92f95a-bc66-51b5-8960-db9aa7af5be8	Breast, NOS	347	NA	stage iia	2013	24125	2019-08-08T16:30:14.878156-05:00	NA	not reported	7th	N0 (i-)	0	NA	NA	NA	NA	Not Reported	NA	c89d1c5e-cb4a-513d-8c5c-b4370879cc22	NA	NA	66	-24125	1947	NA	e3487b39-8abe-5c7b-9fd3-fa639a7c1f2a	Alive	not hispanic or latino	female	white	NA	NA	NA	Radiation Therapy, NOS
TCGA-WT-AB41	Infiltrating duct carcinoma, NOS	not reported	MX	not reported	T2	Stage IIB	Breast, NOS	No	yes	8500/3	C50.9	released	Not Reported	not reported	f22297be-8f05-5bbc-9ef0-4ef3dbba7467	Breast, NOS	1611	NA	stage iib	2010	NA	2019-08-08T16:30:14.878156-05:00	NA	not reported	7th	N1mi	0	NA	NA	NA	NA	Not Reported	NA	e62402c1-b53f-5bb9-bfcd-215a1c026135	NA	NA	55	NA	1955	NA	4b4a696b-09ad-54c2-827f-88bbfda9c42c	Alive	not hispanic or latino	female	black or african american	NA	NA	NA	Radiation Therapy, NOS
TCGA-WT-AB44	Lobular carcinoma, NOS	not reported	MX	not reported	T1c	Stage IA	Breast, NOS	No	no	8520/3	C50.9	released	No	not reported	33236260-b983-5d95-a2ec-93e3169009ed	Breast, NOS	883	NA	stage ia	2012	NA	2019-08-08T16:30:14.878156-05:00	NA	not reported	7th	N0 (i-)	0	NA	NA	NA	NA	Not Reported	NA	6f04dc83-ab3f-5b20-b24b-38493cd1f1e0	NA	NA	77	NA	1935	NA	dee2c887-1140-58fd-9894-b36041a16431	Alive	not hispanic or latino	female	white	NA	NA	NA	Radiation Therapy, NOS
TCGA-XX-A899	Lobular carcinoma, NOS	not reported	MX	not reported	T1c	Stage IIIA	Breast, NOS	No	no	8520/3	C50.9	released	No	not reported	f679d020-6da0-54c3-9904-8bfbbd2c5a57	Breast, NOS	467	NA	stage iiia	2013	17022	2019-08-08T16:30:14.878156-05:00	NA	not reported	7th	N2a	0	NA	NA	NA	NA	Not Reported	NA	986338d0-1c85-5eac-9c1f-970c3cf5b58e	NA	NA	46	-17022	1967	NA	12c6ef8d-6820-594f-92c0-cd032ee1c9f9	Alive	not hispanic or latino	female	white	NA	NA	NA	Radiation Therapy, NOS
TCGA-XX-A89A	Lobular carcinoma, NOS	not reported	MX	not reported	T3	Stage IIB	Breast, NOS	No	no	8520/3	C50.9	released	No	not reported	d171e32b-7c5c-52ec-b98a-cb5509bae812	Breast, NOS	488	NA	stage iib	2013	25000	2019-08-08T16:30:14.878156-05:00	NA	not reported	7th	N0	0	NA	NA	NA	NA	Not Reported	NA	1ecab71a-3760-5c06-af52-42209f8fa410	NA	NA	68	-25000	1945	NA	055f14a8-7b87-5323-bee0-0ab509fb8c29	Alive	not hispanic or latino	female	white	NA	NA	NA	Radiation Therapy, NOS
TCGA-Z7-A8R5	Lobular carcinoma, NOS	not reported	MX	not reported	T3	Stage IIIA	Breast, NOS	No	yes	8520/3	C50.9	released	Not Reported	not reported	3b46c06d-3232-5ebe-a91b-f3e8a1aedf1e	Breast, NOS	3287	NA	stage iiia	2005	22280	2019-08-08T16:30:14.878156-05:00	NA	not reported	6th	N1a	0	NA	NA	NA	NA	Not Reported	NA	f4193aa9-56c6-531a-9f69-28aef4553ba5	NA	NA	61	-22280	1944	NA	2ffb4154-1be1-5bab-9300-ce26ccdd436b	Alive	not hispanic or latino	female	white	NA	NA	NA	Radiation Therapy, NOS
TCGA-Z7-A8R6	Pleomorphic carcinoma	not reported	M0	not reported	T1c	Stage I	Overlapping lesion of breast	No	no	8022/3	C50.8	released	No	not reported	71037d87-bfdd-56d2-874f-fc4dd4fa9932	Overlapping lesion of breast	3256	NA	stage i	2005	16955	2019-08-08T16:30:14.878156-05:00	NA	not reported	6th	N0	0	NA	NA	NA	NA	Not Reported	NA	edadf2f2-99c0-5983-bf77-347e8c1b4c83	NA	NA	46	-16955	1959	NA	ed1a9ed4-1b8f-5394-ada9-84750a14d767	Alive	not hispanic or latino	female	white	NA	NA	NA	Radiation Therapy, NOS
[truncated: 11 more columns]
